# Supplementary material for: Microbial genomes from non-human primate gut metagenomes expand the primate-associated bacterial tree of life with over 1000 novel species
Source: Genome Biol. 2019 Dec 28;20:299. doi: 10.1186/s13059-019-1923-9 (PMC6935492; doi:10.1186/s13059-019-1923-9)
Supplement: Supplementary file 13 — Additional file 13: Table S12. Full list of SGBs. [file 13059_2019_1923_MOESM13_ESM.xlsx]

## Sheet: SGB.May19.v3
# Label	ID	Number of reconstructed genomes	Number of reference genomes	Unknown	Level of assigned taxonomy	Assigned taxonomy
SGB	1	0	1	kSGB	Species	k__Archaea|p__Archaea_unclassified|c__Archaea_unclassified|o__Archaea_unclassified|f__Archaea_unclassified|g__Archaea_unclassified|s__Candidatus_Pacearchaeota_archaeon_CG1_02_35_32|t__SGB1
SGB	2	0	1	kSGB	Species	k__Archaea|p__Archaea_unclassified|c__Archaea_unclassified|o__Archaea_unclassified|f__Archaea_unclassified|g__Archaea_unclassified|s__Candidatus_Pacearchaeota_archaeon_CG10_big_fil_rev_8_21_14_0_10_31_9|t__SGB2
SGB	4	0	1	kSGB	Species	k__Archaea|p__Archaea_unclassified|c__Archaea_unclassified|o__Archaea_unclassified|f__Archaea_unclassified|g__Archaea_unclassified|s__Candidatus_Pacearchaeota_archaeon_CG10_big_fil_rev_8_21_14_0_10_31_24|t__SGB4
SGB	5	0	1	kSGB	Species	k__Archaea|p__Archaea_unclassified|c__Archaea_unclassified|o__Archaea_unclassified|f__Archaea_unclassified|g__Archaea_unclassified|s__Candidatus_Pacearchaeota_archaeon_CG10_big_fil_rev_8_21_14_0_10_34_76|t__SGB5
SGB	7	0	1	kSGB	Species	k__Archaea|p__Candidatus_Micrarchaeota|c__Candidatus_Micrarchaeota_unclassified|o__Candidatus_Micrarchaeota_unclassified|f__Candidatus_Micrarchaeota_unclassified|g__Candidatus_Micrarchaeota_unclassified|s__Candidatus_Micrarchaeota_archaeon_RBG_16_36_9|t__SGB7
SGB	8	0	1	kSGB	Species	k__Archaea|p__Candidatus_Diapherotrites|c__Candidatus_Diapherotrites_unclassified|o__Candidatus_Diapherotrites_unclassified|f__Candidatus_Diapherotrites_unclassified|g__Candidatus_Diapherotrites_unclassified|s__Candidatus_Diapherotrites_archaeon_CG08_land_8_20_14_0_20_30_16|t__SGB8
SGB	9	0	1	kSGB	Species	k__Archaea|p__Candidatus_Bathyarchaeota|c__Candidatus_Bathyarchaeota_unclassified|o__Candidatus_Bathyarchaeota_unclassified|f__Candidatus_Bathyarchaeota_unclassified|g__Candidatus_Bathyarchaeota_unclassified|s__miscellaneous_Crenarchaeota_group_1_archaeon_SG8_32_1|t__SGB9
SGB	10	0	1	kSGB	Species	k__Archaea|p__Candidatus_Aenigmarchaeota|c__Candidatus_Aenigmarchaeota_unclassified|o__Candidatus_Aenigmarchaeota_unclassified|f__Candidatus_Aenigmarchaeota_unclassified|g__Candidatus_Aenigmarchaeota_unclassified|s__Candidatus_Aenigmarchaeota_archaeon_ex4484_14|t__SGB10
SGB	11	0	1	kSGB	Species	k__Bacteria|p__Tenericutes|c__Mollicutes|o__Mycoplasmatales|f__Mycoplasmataceae|g__Mycoplasmataceae_unclassified|s__Mycoplasmataceae_bacterium_RV_VA103A|t__SGB11
SGB	12	0	1	kSGB	Species	k__Bacteria|p__Tenericutes|c__Mollicutes|o__Mycoplasmatales|f__Mycoplasmataceae|g__Mycoplasmataceae_unclassified|s__Mycoplasmataceae_bacterium_RC_NB112A|t__SGB12
SGB	13	0	1	kSGB	Species	k__Bacteria|p__Tenericutes|c__Mollicutes|o__Mycoplasmatales|f__Mycoplasmataceae|g__Mycoplasmataceae_unclassified|s__Mycoplasmataceae_bacterium_CE_OT135|t__SGB13
SGB	17	0	1	kSGB	Species	k__Bacteria|p__Bacteria_unclassified|c__Bacteria_unclassified|o__Bacteria_unclassified|f__Bacteria_unclassified|g__Bacteria_unclassified|s__Parcubacteria_group_bacterium_GW2011_GWA2_46_39|t__SGB17
SGB	19	0	1	kSGB	Species	k__Archaea|p__Candidatus_Woesearchaeota|c__Candidatus_Woesearchaeota_unclassified|o__Candidatus_Woesearchaeota_unclassified|f__Candidatus_Woesearchaeota_unclassified|g__Candidatus_Woesearchaeota_unclassified|s__Candidatus_Woesearchaeota_archaeon|t__SGB19
SGB	20	0	1	kSGB	Species	k__Archaea|p__Archaea_unclassified|c__Archaea_unclassified|o__Archaea_unclassified|f__Archaea_unclassified|g__Archaea_unclassified|s__archaeon_GW2011_AR15|t__SGB20
SGB	21	0	1	kSGB	Species	k__Bacteria|p__Spirochaetes|c__Spirochaetes_unclassified|o__Spirochaetes_unclassified|f__Spirochaetes_unclassified|g__Spirochaetes_unclassified|s__Spirochaetes_bacterium_GWF1_41_5|t__SGB21
SGB	22	0	1	kSGB	Species	k__Archaea|p__Candidatus_Heimdallarchaeota|c__Candidatus_Heimdallarchaeota_unclassified|o__Candidatus_Heimdallarchaeota_unclassified|f__Candidatus_Heimdallarchaeota_unclassified|g__Candidatus_Heimdallarchaeota_unclassified|s__Candidatus_Heimdallarchaeota_archaeon_LC_3|t__SGB22
SGB	24	0	1	kSGB	Species	k__Archaea|p__Archaea_unclassified|c__Archaea_unclassified|o__Archaea_unclassified|f__Archaea_unclassified|g__Archaea_unclassified|s__archaeon_BMS3Abin17|t__SGB24
SGB	27	0	1	kSGB	Species	k__Archaea|p__Candidatus_Woesearchaeota|c__Candidatus_Woesearchaeota_unclassified|o__Candidatus_Woesearchaeota_unclassified|f__Candidatus_Woesearchaeota_unclassified|g__Candidatus_Woesearchaeota_unclassified|s__Candidatus_Woesearchaeota_archaeon|t__SGB27
SGB	28	0	1	kSGB	Species	k__Archaea|p__Candidatus_Woesearchaeota|c__Candidatus_Woesearchaeota_unclassified|o__Candidatus_Woesearchaeota_unclassified|f__Candidatus_Woesearchaeota_unclassified|g__Candidatus_Woesearchaeota_unclassified|s__Candidatus_Woesearchaeota_archaeon|t__SGB28
SGB	29	0	1	kSGB	Species	k__Archaea|p__Candidatus_Lokiarchaeota|c__Candidatus_Lokiarchaeota_unclassified|o__Candidatus_Lokiarchaeota_unclassified|f__Candidatus_Lokiarchaeota_unclassified|g__Candidatus_Lokiarchaeota_unclassified|s__Candidatus_Lokiarchaeota_archaeon_CR_4|t__SGB29
SGB	30	0	1	kSGB	Species	k__Archaea|p__Euryarchaeota|c__Euryarchaeota_unclassified|o__Candidatus_Altiarchaeales|f__Candidatus_Altiarchaeales_archaeon_ex4484_43_unclassified|g__Candidatus_Altiarchaeales_archaeon_ex4484_43_unclassified|s__Candidatus_Altiarchaeales_archaeon_ex4484_43|t__SGB30
SGB	31	0	2	kSGB	Species	k__Archaea|p__Euryarchaeota|c__Euryarchaeota_unclassified|o__Euryarchaeota_unclassified|f__Euryarchaeota_unclassified|g__Euryarchaeota_unclassified|s__candidate_divison_MSBL1_archaeon_SCGC_AAA833K04|t__SGB31
SGB	32	0	3	kSGB	Species	k__Archaea|p__Euryarchaeota|c__Euryarchaeota_unclassified|o__Euryarchaeota_unclassified|f__Euryarchaeota_unclassified|g__Euryarchaeota_unclassified|s__candidate_divison_MSBL1_archaeon_SCGC_AAA261C02|t__SGB32
SGB	33	0	1	kSGB	Species	k__Archaea|p__Euryarchaeota|c__Euryarchaeota_unclassified|o__Euryarchaeota_unclassified|f__Euryarchaeota_unclassified|g__Euryarchaeota_unclassified|s__candidate_divison_MSBL1_archaeon_SCGC_AAA261F17|t__SGB33
SGB	34	0	2	kSGB	Species	k__Archaea|p__Euryarchaeota|c__Euryarchaeota_unclassified|o__Euryarchaeota_unclassified|f__Euryarchaeota_unclassified|g__Euryarchaeota_unclassified|s__candidate_divison_MSBL1_archaeon_SCGC_AAA261D19|t__SGB34
SGB	35	0	1	kSGB	Species	k__Archaea|p__Euryarchaeota|c__Euryarchaeota_unclassified|o__Euryarchaeota_unclassified|f__Euryarchaeota_unclassified|g__Euryarchaeota_unclassified|s__candidate_divison_MSBL1_archaeon_SCGC_AAA385D11|t__SGB35
SGB	36	0	1	kSGB	Species	k__Archaea|p__Euryarchaeota|c__Euryarchaeota_unclassified|o__Euryarchaeota_unclassified|f__Euryarchaeota_unclassified|g__Euryarchaeota_unclassified|s__candidate_divison_MSBL1_archaeon_SCGC_AAA259B11|t__SGB36
SGB	37	0	1	kSGB	Species	k__Archaea|p__Euryarchaeota|c__Euryarchaeota_unclassified|o__Euryarchaeota_unclassified|f__Euryarchaeota_unclassified|g__Euryarchaeota_unclassified|s__candidate_divison_MSBL1_archaeon_SCGC_AAA259J03|t__SGB37
SGB	38	0	2	kSGB	Species	k__Archaea|p__Euryarchaeota|c__Euryarchaeota_unclassified|o__Euryarchaeota_unclassified|f__Euryarchaeota_unclassified|g__Euryarchaeota_unclassified|s__candidate_divison_MSBL1_archaeon_SCGC_AAA259D14|t__SGB38
SGB	40	0	1	kSGB	Species	k__Archaea|p__Euryarchaeota|c__Euryarchaeota_unclassified|o__Euryarchaeota_unclassified|f__Euryarchaeota_unclassified|g__Euryarchaeota_unclassified|s__candidate_divison_MSBL1_archaeon_SCGC_AAA259I09|t__SGB40
SGB	41	0	1	kSGB	Species	k__Archaea|p__Euryarchaeota|c__Euryarchaeota_unclassified|o__Euryarchaeota_unclassified|f__Euryarchaeota_unclassified|g__Euryarchaeota_unclassified|s__candidate_divison_MSBL1_archaeon_SCGC_AAA259M10|t__SGB41
SGB	42	0	1	kSGB	Species	k__Archaea|p__Euryarchaeota|c__Euryarchaeota_unclassified|o__Euryarchaeota_unclassified|f__Euryarchaeota_unclassified|g__Euryarchaeota_unclassified|s__candidate_divison_MSBL1_archaeon_SCGC_AAA259I07|t__SGB42
SGB	43	0	1	kSGB	Species	k__Archaea|p__Euryarchaeota|c__Euryarchaeota_unclassified|o__Euryarchaeota_unclassified|f__Euryarchaeota_unclassified|g__Euryarchaeota_unclassified|s__candidate_divison_MSBL1_archaeon_SCGC_AAA259I14|t__SGB43
SGB	44	0	1	kSGB	Species	k__Archaea|p__Euryarchaeota|c__Euryarchaeota_unclassified|o__Euryarchaeota_unclassified|f__Euryarchaeota_unclassified|g__Euryarchaeota_unclassified|s__candidate_divison_MSBL1_archaeon_SCGC_AAA259E17|t__SGB44
SGB	45	0	1	kSGB	Species	k__Archaea|p__Euryarchaeota|c__Euryarchaeota_unclassified|o__Euryarchaeota_unclassified|f__Euryarchaeota_unclassified|g__Euryarchaeota_unclassified|s__candidate_divison_MSBL1_archaeon_SCGC_AAA259E19|t__SGB45
SGB	46	0	1	kSGB	Species	k__Archaea|p__Euryarchaeota|c__Euryarchaeota_unclassified|o__Euryarchaeota_unclassified|f__Euryarchaeota_unclassified|g__Euryarchaeota_unclassified|s__candidate_divison_MSBL1_archaeon_SCGC_AAA259O05|t__SGB46
SGB	47	0	1	kSGB	Species	k__Archaea|p__Euryarchaeota|c__Euryarchaeota_unclassified|o__Euryarchaeota_unclassified|f__Euryarchaeota_unclassified|g__Euryarchaeota_unclassified|s__candidate_divison_MSBL1_archaeon_SCGC_AAA259A05|t__SGB47
SGB	48	0	1	kSGB	Species	k__Archaea|p__Euryarchaeota|c__Euryarchaeota_unclassified|o__Euryarchaeota_unclassified|f__Euryarchaeota_unclassified|g__Euryarchaeota_unclassified|s__candidate_divison_MSBL1_archaeon_SCGC_AAA259D18|t__SGB48
SGB	49	0	1	kSGB	Species	k__Archaea|p__Euryarchaeota|c__Euryarchaeota_unclassified|o__Euryarchaeota_unclassified|f__Euryarchaeota_unclassified|g__Euryarchaeota_unclassified|s__candidate_divison_MSBL1_archaeon_SCGC_AAA382A03|t__SGB49
SGB	50	0	1	kSGB	Species	k__Archaea|p__Euryarchaeota|c__Euryarchaeota_unclassified|o__Euryarchaeota_unclassified|f__Euryarchaeota_unclassified|g__Euryarchaeota_unclassified|s__candidate_divison_MSBL1_archaeon_SCGC_AAA382A13|t__SGB50
SGB	51	0	1	kSGB	Species	k__Archaea|p__Euryarchaeota|c__Euryarchaeota_unclassified|o__Euryarchaeota_unclassified|f__Euryarchaeota_unclassified|g__Euryarchaeota_unclassified|s__candidate_divison_MSBL1_archaeon_SCGC_AAA382A20|t__SGB51
SGB	52	0	1	kSGB	Species	k__Archaea|p__Euryarchaeota|c__Euryarchaeota_unclassified|o__Euryarchaeota_unclassified|f__Euryarchaeota_unclassified|g__Euryarchaeota_unclassified|s__candidate_divison_MSBL1_archaeon_SCGC_AAA382C18|t__SGB52
SGB	53	0	1	kSGB	Species	k__Archaea|p__Euryarchaeota|c__Euryarchaeota_unclassified|o__Euryarchaeota_unclassified|f__Euryarchaeota_unclassified|g__Euryarchaeota_unclassified|s__candidate_divison_MSBL1_archaeon_SCGC_AAA382K21|t__SGB53
SGB	54	0	1	kSGB	Species	k__Archaea|p__Euryarchaeota|c__Euryarchaeota_unclassified|o__Euryarchaeota_unclassified|f__Euryarchaeota_unclassified|g__Euryarchaeota_unclassified|s__candidate_divison_MSBL1_archaeon_SCGC_AAA382M17|t__SGB54
SGB	55	0	1	kSGB	Species	k__Archaea|p__Euryarchaeota|c__Euryarchaeota_unclassified|o__Euryarchaeota_unclassified|f__Euryarchaeota_unclassified|g__Euryarchaeota_unclassified|s__candidate_divison_MSBL1_archaeon_SCGC_AAA382F02|t__SGB55
SGB	56	0	1	kSGB	Species	k__Archaea|p__Euryarchaeota|c__Euryarchaeota_unclassified|o__Euryarchaeota_unclassified|f__Euryarchaeota_unclassified|g__Euryarchaeota_unclassified|s__candidate_divison_MSBL1_archaeon_SCGC_AAA382N08|t__SGB56
SGB	57	0	2	kSGB	Species	k__Archaea|p__Candidatus_Micrarchaeota|c__Candidatus_Micrarchaeota_unclassified|o__Candidatus_Micrarchaeota_unclassified|f__Candidatus_Micrarchaeota_unclassified|g__Candidatus_Micrarchaeota_unclassified|s__Candidatus_Micrarchaeota_archaeon_CG1_02_47_40|t__SGB57
SGB	58	0	1	kSGB	Species	k__Archaea|p__Candidatus_Diapherotrites|c__Candidatus_Diapherotrites_unclassified|o__Candidatus_Diapherotrites_unclassified|f__Candidatus_Diapherotrites_unclassified|g__Candidatus_Diapherotrites_unclassified|s__Candidatus_Diapherotrites_archaeon_CG08_land_8_20_14_0_20_34_12|t__SGB58
SGB	59	0	4	kSGB	Species	k__Archaea|p__Candidatus_Micrarchaeota|c__Candidatus_Micrarchaeota_unclassified|o__Candidatus_Micrarchaeota_unclassified|f__Candidatus_Micrarchaeota_unclassified|g__Candidatus_Micrarchaeota_unclassified|s__Candidatus_Micrarchaeota_archaeon_CG1_02_49_24|t__SGB59
SGB	60	0	1	kSGB	Species	k__Archaea|p__Candidatus_Micrarchaeota|c__Candidatus_Micrarchaeota_unclassified|o__Candidatus_Micrarchaeota_unclassified|f__Candidatus_Micrarchaeota_unclassified|g__Candidatus_Micrarchaeota_unclassified|s__Candidatus_Micrarchaeota_archaeon_CG1_02_55_22|t__SGB60
SGB	61	0	1	kSGB	Species	k__Archaea|p__Candidatus_Micrarchaeota|c__Candidatus_Micrarchaeota_unclassified|o__Candidatus_Micrarchaeota_unclassified|f__Candidatus_Micrarchaeota_unclassified|g__Candidatus_Micrarchaeota_unclassified|s__Candidatus_Micrarchaeota_archaeon_CG08_land_8_20_14_0_20_59_11|t__SGB61
SGB	62	0	1	kSGB	Species	k__Archaea|p__Candidatus_Micrarchaeota|c__Candidatus_Micrarchaeota_unclassified|o__Candidatus_Micrarchaeota_unclassified|f__Candidatus_Micrarchaeota_unclassified|g__Candidatus_Micrarchaeota_unclassified|s__Candidatus_Micrarchaeota_archaeon_CG10_big_fil_rev_8_21_14_0_10_59_7|t__SGB62
SGB	63	0	5	kSGB	Species	k__Archaea|p__Candidatus_Micrarchaeota|c__Candidatus_Micrarchaeota_unclassified|o__Candidatus_Micrarchaeota_unclassified|f__Candidatus_Micrarchaeota_unclassified|g__Candidatus_Micrarchaeota_unclassified|s__Candidatus_Micrarchaeota_archaeon_CG1_02_60_51|t__SGB63
SGB	64	0	4	kSGB	Species	k__Archaea|p__Candidatus_Micrarchaeota|c__Candidatus_Micrarchaeota_unclassified|o__Candidatus_Micrarchaeota_unclassified|f__Candidatus_Micrarchaeota_unclassified|g__Candidatus_Micrarchaeota_unclassified|s__Candidatus_Micrarchaeota_archaeon_CG1_02_55_41|t__SGB64
SGB	65	0	1	kSGB	Species	k__Archaea|p__Candidatus_Micrarchaeota|c__Candidatus_Micrarchaeota_unclassified|o__Candidatus_Micrarchaeota_unclassified|f__Candidatus_Micrarchaeota_unclassified|g__Candidatus_Micrarchaeota_unclassified|s__Candidatus_Micrarchaeota_archaeon_CG1_02_51_15|t__SGB65
SGB	66	0	1	kSGB	Species	k__Archaea|p__Candidatus_Micrarchaeota|c__Candidatus_Micrarchaeota_unclassified|o__Candidatus_Micrarchaeota_unclassified|f__Candidatus_Micrarchaeota_unclassified|g__Candidatus_Micrarchaeota_unclassified|s__Candidatus_Micrarchaeota_archaeon_CG10_big_fil_rev_8_21_14_0_10_45_29|t__SGB66
SGB	67	0	3	kSGB	Species	k__Archaea|p__Euryarchaeota|c__Methanomicrobia|o__Methanomicrobia_unclassified|f__Methanomicrobia_unclassified|g__Methanomicrobia_unclassified|s__Arc_I_group_archaeon_ADurb1013_Bin02101|t__SGB67
SGB	68	0	3	kSGB	Species	k__Archaea|p__Euryarchaeota|c__Methanomicrobia|o__Methanomicrobia_unclassified|f__Methanomicrobia_unclassified|g__Methanomicrobia_unclassified|s__Arc_I_group_archaeon_BMIXfssc0709_Meth_Bin006|t__SGB68
SGB	69	0	1	kSGB	Species	k__Archaea|p__Euryarchaeota|c__Methanomicrobia|o__Methanomicrobia_unclassified|f__Methanomicrobia_unclassified|g__Methanomicrobia_unclassified|s__Arc_I_group_archaeon_U1lsi0528_Bin055|t__SGB69
SGB	70	0	1	kSGB	Species	k__Archaea|p__Euryarchaeota|c__Methanomicrobia|o__Methanomicrobia_unclassified|f__Methanomicrobia_unclassified|g__Methanomicrobia_unclassified|s__Arc_I_group_archaeon_U1lsi0528_Bin089|t__SGB70
SGB	71	0	7	kSGB	Species	k__Archaea|p__Candidatus_Aenigmarchaeota|c__Candidatus_Aenigmarchaeota_unclassified|o__Candidatus_Aenigmarchaeota_unclassified|f__Candidatus_Aenigmarchaeota_unclassified|g__Candidatus_Aenigmarchaeota_unclassified|s__Candidatus_Aenigmarchaeota_archaeon_CG1_02_38_14|t__SGB71
SGB	72	0	1	kSGB	Species	k__Archaea|p__Candidatus_Micrarchaeota|c__Candidatus_Micrarchaeota_unclassified|o__Candidatus_Micrarchaeota_unclassified|f__Candidatus_Micrarchaeota_unclassified|g__Candidatus_Micrarchaeota_unclassified|s__Candidatus_Micrarchaeota_archaeon_RBG_16_49_10|t__SGB72
SGB	75	0	1	kSGB	Species	k__Bacteria|p__Spirochaetes|c__Spirochaetia|o__Spirochaetia_unclassified|f__Leptospiraceae|g__Leptospiraceae_bacterium_unclassified|s__Leptospiraceae_bacterium|t__SGB75
SGB	76	0	1	kSGB	Species	k__Archaea|p__Euryarchaeota|c__Theionarchaea|o__Theionarchaea_unclassified|f__Theionarchaea_unclassified|g__Theionarchaea_unclassified|s__Theionarchaea_archaeon_DG_70|t__SGB76
SGB	77	0	1	kSGB	Species	k__Archaea|p__Euryarchaeota|c__Theionarchaea|o__Theionarchaea_unclassified|f__Theionarchaea_unclassified|g__Theionarchaea_unclassified|s__Theionarchaea_archaeon_DG_70_1|t__SGB77
SGB	78	0	2	kSGB	Species	k__Archaea|p__Candidatus_Thorarchaeota|c__Candidatus_Thorarchaeota_unclassified|o__Candidatus_Thorarchaeota_unclassified|f__Candidatus_Thorarchaeota_unclassified|g__Candidatus_Thorarchaeota_unclassified|s__Candidatus_Thorarchaeota_archaeon_SMTZ1_45|t__SGB78
SGB	79	0	1	kSGB	Species	k__Archaea|p__Candidatus_Thorarchaeota|c__Candidatus_Thorarchaeota_unclassified|o__Candidatus_Thorarchaeota_unclassified|f__Candidatus_Thorarchaeota_unclassified|g__Candidatus_Thorarchaeota_unclassified|s__Candidatus_Thorarchaeota_archaeon_AB_25|t__SGB79
SGB	80	0	1	kSGB	Species	k__Archaea|p__Candidatus_Thorarchaeota|c__Candidatus_Thorarchaeota_unclassified|o__Candidatus_Thorarchaeota_unclassified|f__Candidatus_Thorarchaeota_unclassified|g__Candidatus_Thorarchaeota_unclassified|s__Candidatus_Thorarchaeota_archaeon_SMTZ1_83|t__SGB80
SGB	81	0	2	kSGB	Species	k__Archaea|p__Crenarchaeota|c__Crenarchaeota_unclassified|o__Crenarchaeota_unclassified|f__Crenarchaeota_unclassified|g__Crenarchaeota_unclassified|s__Crenarchaeota_archaeon_13_1_40CM_3_52_17|t__SGB81
SGB	82	0	1	kSGB	Species	k__Archaea|p__Crenarchaeota|c__Crenarchaeota_unclassified|o__Crenarchaeota_unclassified|f__Crenarchaeota_unclassified|g__Crenarchaeota_unclassified|s__Crenarchaeota_archaeon_13_1_40CM_3_52_10|t__SGB82
SGB	83	0	1	kSGB	Species	k__Archaea|p__Crenarchaeota|c__Crenarchaeota_unclassified|o__Crenarchaeota_unclassified|f__Crenarchaeota_unclassified|g__Crenarchaeota_unclassified|s__Crenarchaeota_archaeon_13_1_20CM_2_51_8|t__SGB83
SGB	84	0	1	kSGB	Species	k__Archaea|p__Crenarchaeota|c__Crenarchaeota_unclassified|o__Crenarchaeota_unclassified|f__Crenarchaeota_unclassified|g__Crenarchaeota_unclassified|s__Crenarchaeota_archaeon_13_1_40CM_3_53_5|t__SGB84
SGB	85	0	1	kSGB	Species	k__Archaea|p__Crenarchaeota|c__Crenarchaeota_unclassified|o__Crenarchaeota_unclassified|f__Crenarchaeota_unclassified|g__Crenarchaeota_unclassified|s__Crenarchaeota_archaeon_13_1_20CM_2_53_14|t__SGB85
SGB	87	0	1	kSGB	Species	k__Archaea|p__Crenarchaeota|c__Crenarchaeota_unclassified|o__Crenarchaeota_unclassified|f__Crenarchaeota_unclassified|g__Crenarchaeota_unclassified|s__Crenarchaeota_archaeon_13_1_40CM_3_52_4|t__SGB87
SGB	88	0	1	kSGB	Species	k__Archaea|p__Euryarchaeota|c__Euryarchaeota_unclassified|o__Euryarchaeota_unclassified|f__Euryarchaeota_unclassified|g__Euryarchaeota_unclassified|s__candidate_divison_MSBL1_archaeon_SCGC_AAA385M02|t__SGB88
SGB	89	0	1	kSGB	Species	k__Bacteria|p__Proteobacteria|c__Deltaproteobacteria|o__Myxococcales|f__Myxococcales_unclassified|g__Myxococcales_unclassified|s__Myxococcales_bacterium|t__SGB89
SGB	90	0	1	kSGB	Species	k__Bacteria|p__Chloroflexi|c__Chloroflexi_unclassified|o__Chloroflexi_unclassified|f__Chloroflexi_unclassified|g__Chloroflexi_unclassified|s__Chloroflexi_bacterium|t__SGB90
SGB	91	0	1	kSGB	Species	k__Bacteria|p__Chloroflexi|c__Chloroflexi_unclassified|o__Chloroflexi_unclassified|f__Chloroflexi_unclassified|g__Chloroflexi_unclassified|s__Chloroflexi_bacterium|t__SGB91
SGB	92	0	1	kSGB	Species	k__Bacteria|p__Chloroflexi|c__Chloroflexi_unclassified|o__Chloroflexi_unclassified|f__Chloroflexi_unclassified|g__Chloroflexi_unclassified|s__Chloroflexi_bacterium|t__SGB92
SGB	93	0	1	kSGB	Species	k__Bacteria|p__Chloroflexi|c__Chloroflexi_unclassified|o__Chloroflexi_unclassified|f__Chloroflexi_unclassified|g__Chloroflexi_unclassified|s__Chloroflexi_bacterium|t__SGB93
SGB	98	0	1	kSGB	Species	k__Bacteria|p__Bacteria_unclassified|c__Bacteria_unclassified|o__Bacteria_unclassified|f__Bacteria_unclassified|g__Bacteria_unclassified|s__candidate_division_WS6_bacterium_GW2011_GWF2_39_15|t__SGB98
SGB	110	0	3	kSGB	Species	k__Bacteria|p__candidate_division_WWE3|c__candidate_division_WWE3_unclassified|o__candidate_division_WWE3_unclassified|f__candidate_division_WWE3_unclassified|g__candidate_division_WWE3_unclassified|s__candidate_division_WWE3_bacterium_RIFCSPHIGHO2_02_FULL_38_14|t__SGB110
SGB	111	0	1	kSGB	Species	k__Bacteria|p__candidate_division_WWE3|c__candidate_division_WWE3_unclassified|o__candidate_division_WWE3_unclassified|f__candidate_division_WWE3_unclassified|g__candidate_division_WWE3_unclassified|s__candidate_division_WWE3_bacterium_RBG_16_37_10|t__SGB111
SGB	112	0	3	kSGB	Species	k__Bacteria|p__candidate_division_WWE3|c__candidate_division_WWE3_unclassified|o__candidate_division_WWE3_unclassified|f__candidate_division_WWE3_unclassified|g__candidate_division_WWE3_unclassified|s__candidate_division_WWE3_bacterium_GW2011_GWB1_41_6|t__SGB112
SGB	114	0	2	kSGB	Species	k__Bacteria|p__candidate_division_WWE3|c__candidate_division_WWE3_unclassified|o__candidate_division_WWE3_unclassified|f__candidate_division_WWE3_unclassified|g__candidate_division_WWE3_unclassified|s__candidate_division_WWE3_bacterium_RIFOXYC1_FULL_39_7|t__SGB114
SGB	115	0	4	kSGB	Species	k__Bacteria|p__candidate_division_WWE3|c__candidate_division_WWE3_unclassified|o__candidate_division_WWE3_unclassified|f__candidate_division_WWE3_unclassified|g__candidate_division_WWE3_unclassified|s__candidate_division_WWE3_bacterium_RAAC2_WWE3_1|t__SGB115
SGB	116	0	2	kSGB	Species	k__Bacteria|p__candidate_division_WWE3|c__candidate_division_WWE3_unclassified|o__candidate_division_WWE3_unclassified|f__candidate_division_WWE3_unclassified|g__candidate_division_WWE3_unclassified|s__candidate_division_WWE3_bacterium_GW2011_GWA1_42_12|t__SGB116
SGB	117	0	7	kSGB	Species	k__Bacteria|p__candidate_division_WWE3|c__candidate_division_WWE3_unclassified|o__candidate_division_WWE3_unclassified|f__candidate_division_WWE3_unclassified|g__candidate_division_WWE3_unclassified|s__candidate_division_WWE3_bacterium_RIFOXYA1_FULL_40_11|t__SGB117
SGB	119	0	1	kSGB	Species	k__Bacteria|p__Bacteria_unclassified|c__Bacteria_unclassified|o__Bacteria_unclassified|f__Bacteria_unclassified|g__Bacteria_unclassified|s__Parcubacteria_group_bacterium_GW2011_GWA2_56_7|t__SGB119
SGB	120	0	1	kSGB	Species	k__Bacteria|p__Candidatus_Uhrbacteria|c__Candidatus_Uhrbacteria_unclassified|o__Candidatus_Uhrbacteria_unclassified|f__Candidatus_Uhrbacteria_unclassified|g__Candidatus_Uhrbacteria_unclassified|s__Candidatus_Uhrbacteria_bacterium_RIFCSPLOWO2_02_FULL_49_11|t__SGB120
SGB	121	2	0	uSGB	Other	k__Bacteria|p__Aquificae|c__CFGB69|o__OFGB69|f__FGB69|g__GGB102|s__GGB102_SGB121|t__SGB121
SGB	122	0	1	kSGB	Species	k__Bacteria|p__Candidatus_Coatesbacteria|c__Candidatus_Coatesbacteria_unclassified|o__Candidatus_Coatesbacteria_unclassified|f__Candidatus_Coatesbacteria_unclassified|g__Candidatus_Coatesbacteria_unclassified|s__Candidatus_Coatesbacteria_bacterium_4484_99|t__SGB122
SGB	124	2	0	uSGB	Other	k__Bacteria|p__Bacteroidetes|c__CFGB72|o__OFGB72|f__FGB72|g__GGB105|s__GGB105_SGB124|t__SGB124
SGB	125	1	0	uSGB	Other	k__Bacteria|p__Firmicutes|c__CFGB73|o__OFGB73|f__FGB73|g__GGB106|s__GGB106_SGB125|t__SGB125
SGB	130	0	2	kSGB	Species	k__Archaea|p__Candidatus_Micrarchaeota|c__Candidatus_Micrarchaeota_unclassified|o__Candidatus_Micrarchaeota_unclassified|f__Candidatus_Micrarchaeota_unclassified|g__Candidatus_Micrarchaeum|s__Candidatus_Micrarchaeum_acidiphilum|t__SGB130
SGB	131	0	1	kSGB	Species	k__Archaea|p__Candidatus_Micrarchaeota|c__Candidatus_Micrarchaeota_unclassified|o__Candidatus_Micrarchaeota_unclassified|f__Candidatus_Micrarchaeota_unclassified|g__Candidatus_Micrarchaeota_unclassified|s__Candidatus_Micrarchaeota_archaeon_Mia14|t__SGB131
SGB	133	0	1	kSGB	Species	k__Bacteria|p__Chloroflexi|c__Chloroflexi_unclassified|o__Chloroflexi_unclassified|f__Chloroflexi_unclassified|g__Chloroflexi_unclassified|s__Chloroflexi_bacterium|t__SGB133
SGB	135	0	1	kSGB	Species	k__Bacteria|p__Chloroflexi|c__Chloroflexi_unclassified|o__Chloroflexi_unclassified|f__Chloroflexi_unclassified|g__Chloroflexi_unclassified|s__Chloroflexi_bacterium|t__SGB135
SGB	136	0	2	kSGB	Species	k__Archaea|p__Candidatus_Bathyarchaeota|c__Candidatus_Bathyarchaeota_unclassified|o__Candidatus_Bathyarchaeota_unclassified|f__Candidatus_Bathyarchaeota_unclassified|g__Candidatus_Bathyarchaeota_unclassified|s__Candidatus_Bathyarchaeota_archaeon_RBG_13_60_20|t__SGB136
SGB	137	0	1	kSGB	Species	k__Archaea|p__Candidatus_Bathyarchaeota|c__Candidatus_Bathyarchaeota_unclassified|o__Candidatus_Bathyarchaeota_unclassified|f__Candidatus_Bathyarchaeota_unclassified|g__Candidatus_Bathyarchaeota_unclassified|s__Candidatus_Bathyarchaeota_archaeon_RBG_13_52_12|t__SGB137
SGB	138	0	1	kSGB	Species	k__Archaea|p__Candidatus_Bathyarchaeota|c__Candidatus_Bathyarchaeota_unclassified|o__Candidatus_Bathyarchaeota_unclassified|f__Candidatus_Bathyarchaeota_unclassified|g__Candidatus_Bathyarchaeota_unclassified|s__miscellaneous_Crenarchaeota_group_15_archaeon_DG_45|t__SGB138
SGB	139	0	1	kSGB	Species	k__Archaea|p__Candidatus_Bathyarchaeota|c__Candidatus_Bathyarchaeota_unclassified|o__Candidatus_Bathyarchaeota_unclassified|f__Candidatus_Bathyarchaeota_unclassified|g__Candidatus_Bathyarchaeota_unclassified|s__Candidatus_Bathyarchaeota_archaeon_B23|t__SGB139
SGB	141	0	1	kSGB	Species	k__Archaea|p__Euryarchaeota|c__Methanomicrobia|o__Methanomicrobiales|f__Methanocorpusculaceae|g__Methanocorpusculum|s__Methanocorpusculum_labreanum|t__SGB141
SGB	143	0	1	kSGB	Species	k__Archaea|p__Euryarchaeota|c__Methanomicrobia|o__Methanomicrobiales|f__Methanomicrobiaceae|g__Methanolacinia|s__Methanolacinia_petrolearia|t__SGB143
SGB	144	0	1	kSGB	Species	k__Archaea|p__Euryarchaeota|c__Methanomicrobia|o__Methanomicrobiales|f__Methanomicrobiaceae|g__Methanoplanus|s__Methanoplanus_limicola|t__SGB144
SGB	145	0	1	kSGB	Species	k__Archaea|p__Euryarchaeota|c__Methanomicrobia|o__Methanomicrobiales|f__Methanospirillaceae|g__Methanospirillum|s__Methanospirillum_hungatei|t__SGB145
SGB	146	0	1	kSGB	Species	k__Archaea|p__Euryarchaeota|c__Methanomicrobia|o__Methanomicrobiales|f__Methanomicrobiales_unclassified|g__Methanomicrobiales_unclassified|s__Methanomicrobiales_archaeon_HGW_Methanomicrobiales_4|t__SGB146
SGB	149	0	1	kSGB	Species	k__Archaea|p__Euryarchaeota|c__Methanomicrobia|o__Methanomicrobiales|f__Methanoregulaceae|g__Methanoregula|s__Methanoregula_boonei|t__SGB149
SGB	153	0	1	kSGB	Species	k__Archaea|p__Euryarchaeota|c__Methanomicrobia|o__Methanomicrobiales|f__Methanomicrobiales_unclassified|g__Methanomicrobiales_unclassified|s__Methanomicrobiales_archaeon_HGW_Methanomicrobiales_3|t__SGB153
SGB	155	0	1	kSGB	Species	k__Archaea|p__Euryarchaeota|c__Methanomicrobia|o__Methanomicrobiales|f__Methanoregulaceae|g__Methanoregula|s__Methanoregula_formicica|t__SGB155
SGB	156	0	1	kSGB	Species	k__Archaea|p__Euryarchaeota|c__Methanomicrobia|o__Methanomicrobiales|f__Methanomicrobiales_unclassified|g__Methanomicrobiales_unclassified|s__Methanomicrobiales_archaeon_HGW_Methanomicrobiales_1|t__SGB156
SGB	163	0	1	kSGB	Species	k__Archaea|p__Euryarchaeota|c__Methanomicrobia|o__Methanomicrobiales|f__Methanoregulaceae|g__Methanosphaerula|s__Methanosphaerula_palustris|t__SGB163
SGB	166	0	2	kSGB	Species	k__Archaea|p__Euryarchaeota|c__Methanomicrobia|o__Methanomicrobiales|f__Methanocalculaceae|g__Methanocalculus|s__Methanocalculus_sp_52_23|t__SGB166
SGB	168	0	1	kSGB	Species	k__Archaea|p__Euryarchaeota|c__Methanomicrobia|o__Methanomicrobiales|f__Methanomicrobiaceae|g__Methanofollis|s__Methanofollis_liminatans|t__SGB168
SGB	170	0	3	kSGB	Species	k__Archaea|p__Euryarchaeota|c__Methanomicrobia|o__Methanomicrobiales|f__Methanomicrobiaceae|g__Methanoculleus|s__Methanoculleus_bourgensis|t__SGB170
SGB	176	0	1	kSGB	Species	k__Archaea|p__Euryarchaeota|c__Methanomicrobia|o__Methanomicrobiales|f__Methanomicrobiales_unclassified|g__Methanomicrobiales_unclassified|s__Methanomicrobiales_archaeon_HGW_Methanomicrobiales_2|t__SGB176
SGB	177	0	2	kSGB	Species	k__Archaea|p__Euryarchaeota|c__Methanomicrobia|o__Methanomicrobiales|f__Methanomicrobiaceae|g__Methanoculleus|s__Methanoculleus_marisnigri|t__SGB177
SGB	178	0	1	kSGB	Species	k__Archaea|p__Euryarchaeota|c__Methanomicrobia|o__Methanomicrobiales|f__Methanomicrobiaceae|g__Methanoculleus|s__Methanoculleus_sediminis|t__SGB178
SGB	179	0	1	kSGB	Species	k__Archaea|p__Euryarchaeota|c__Methanomicrobia|o__Methanomicrobiales|f__Methanomicrobiaceae|g__Methanoculleus|s__Methanoculleus_chikugoensis|t__SGB179
SGB	180	0	1	kSGB	Species	k__Archaea|p__Euryarchaeota|c__Methanomicrobia|o__Methanomicrobiales|f__Methanomicrobiales_unclassified|g__Methanomicrobiales_unclassified|s__Methanomicrobiales_archaeon_HGW_Methanomicrobiales_6|t__SGB180
SGB	184	0	1	kSGB	Species	k__Archaea|p__Euryarchaeota|c__Methanomicrobia|o__Methanocellales|f__Methanocellaceae|g__Methanocella|s__Methanocella_paludicola|t__SGB184
SGB	185	0	1	kSGB	Species	k__Archaea|p__Euryarchaeota|c__Methanomicrobia|o__Methanocellales|f__Methanocellaceae|g__Methanocella|s__Methanocella_conradii|t__SGB185
SGB	186	0	1	kSGB	Species	k__Archaea|p__Euryarchaeota|c__Methanomicrobia|o__Methanocellales|f__Methanocellaceae|g__Methanocella|s__Methanocella_arvoryzae|t__SGB186
SGB	187	0	1	kSGB	Species	k__Archaea|p__Euryarchaeota|c__Methanomicrobia|o__Methanosarcinales|f__Methanosaetaceae|g__Methanothrix|s__Methanothrix_soehngenii|t__SGB187
SGB	191	0	2	kSGB	Species	k__Archaea|p__Euryarchaeota|c__Methanomicrobia|o__Methanosarcinales|f__Methanosaetaceae|g__Methanothrix|s__Methanosaeta_harundinacea|t__SGB191
SGB	194	0	1	kSGB	Species	k__Archaea|p__Euryarchaeota|c__Methanomicrobia|o__Methanosarcinales|f__Methanosaetaceae|g__Methanothrix|s__Methanosaeta_harundinacea|t__SGB194
SGB	196	0	1	kSGB	Species	k__Archaea|p__Euryarchaeota|c__Methanomicrobia|o__Methanosarcinales|f__Methanosaetaceae|g__Methanothrix|s__Methanothrix_thermoacetophila|t__SGB196
SGB	200	0	2	kSGB	Species	k__Archaea|p__Euryarchaeota|c__Halobacteria|o__Haloferacales|f__Halorubraceae|g__Halorubrum|s__Halorubrum_sp_J07HR59|t__SGB200
SGB	201	0	1	kSGB	Species	k__Archaea|p__Candidatus_Nanohaloarchaeota|c__Nanohaloarchaea|o__Nanohaloarchaea_unclassified|f__Nanohaloarchaea_unclassified|g__Candidatus_Nanosalinarum|s__Candidatus_Nanosalinarum_sp_J07AB56|t__SGB201
SGB	202	0	1	kSGB	Species	k__Archaea|p__Euryarchaeota|c__Halobacteria|o__Halobacteriales|f__Halobacteriales_unclassified|g__Halobacteriales_unclassified|s__halophilic_archaeon_J07HX5|t__SGB202
SGB	203	0	2	kSGB	Species	k__Archaea|p__Euryarchaeota|c__Halobacteria|o__Haloferacales|f__Haloferacaceae|g__Haloquadratum|s__Haloquadratum_walsbyi|t__SGB203
SGB	204	0	1	kSGB	Species	k__Archaea|p__Euryarchaeota|c__Halobacteria|o__Haloferacales|f__Haloferacaceae|g__Haloquadratum|s__Haloquadratum_walsbyi|t__SGB204
SGB	205	0	1	kSGB	Species	k__Archaea|p__Euryarchaeota|c__Halobacteria|o__Haloferacales|f__Haloferacaceae|g__Haloquadratum|s__Haloquadratum_walsbyi|t__SGB205
SGB	206	0	1	kSGB	Species	k__Archaea|p__Euryarchaeota|c__Halobacteria|o__Haloferacales|f__Haloferacaceae|g__Haloquadratum|s__Haloquadratum_sp_J07HQX50|t__SGB206
SGB	207	0	2	kSGB	Species	k__Archaea|p__Euryarchaeota|c__Halobacteria|o__Halobacteriales|f__Halobacteriaceae|g__Halanaeroarchaeum|s__Halanaeroarchaeum_sulfurireducens|t__SGB207
SGB	208	0	2	kSGB	Species	k__Archaea|p__Euryarchaeota|c__Halobacteria|o__Halobacteriales|f__Halobacteriaceae|g__Halodesulfurarchaeum|s__Halodesulfurarchaeum_formicicum|t__SGB208
SGB	209	0	1	kSGB	Species	k__Archaea|p__Euryarchaeota|c__Halobacteria|o__Halobacteriales|f__Halobacteriales_unclassified|g__Halobacteriales_unclassified|s__halophilic_archaeon_J07HX64|t__SGB209
SGB	210	0	1	kSGB	Species	k__Archaea|p__Euryarchaeota|c__Halobacteria|o__Halobacteriales|f__Halobacteriaceae|g__Halovenus|s__Halovenus_aranensis|t__SGB210
SGB	211	0	1	kSGB	Species	k__Archaea|p__Euryarchaeota|c__Halobacteria|o__Halobacteriales|f__Halobacteriales_unclassified|g__Halobacteriales_unclassified|s__halophilic_archaeon_J07HB67|t__SGB211
SGB	212	0	1	kSGB	Species	k__Archaea|p__Archaea_unclassified|c__Archaea_unclassified|o__Archaea_unclassified|f__Archaea_unclassified|g__Archaea_unclassified|s__uncultured_archaeon_A07HB70|t__SGB212
SGB	213	0	3	kSGB	Species	k__Archaea|p__Euryarchaeota|c__Halobacteria|o__Halobacteriales|f__Halobacteriaceae|g__Haladaptatus|s__Haladaptatus_paucihalophilus|t__SGB213
SGB	214	0	1	kSGB	Species	k__Archaea|p__Euryarchaeota|c__Halobacteria|o__Halobacteriales|f__Halobacteriaceae|g__Haladaptatus|s__Haladaptatus_sp_R4|t__SGB214
SGB	215	0	1	kSGB	Species	k__Archaea|p__Euryarchaeota|c__Halobacteria|o__Halobacteriales|f__Halobacteriaceae|g__Haladaptatus|s__Haladaptatus_litoreus|t__SGB215
SGB	216	0	2	kSGB	Species	k__Archaea|p__Euryarchaeota|c__Halobacteria|o__Haloferacales|f__Halorubraceae|g__Halonotius|s__Halonotius_sp_J07HN6|t__SGB216
SGB	217	0	1	kSGB	Species	k__Archaea|p__Euryarchaeota|c__Halobacteria|o__Haloferacales|f__Halorubraceae|g__Halonotius|s__Halonotius_sp_J07HN4|t__SGB217
SGB	218	0	1	kSGB	Species	k__Archaea|p__Euryarchaeota|c__Halobacteria|o__Halobacteriales|f__Haloarculaceae|g__Natronomonas|s__Natronomonas_pharaonis|t__SGB218
SGB	219	0	1	kSGB	Species	k__Archaea|p__Euryarchaeota|c__Halobacteria|o__Halobacteriales|f__Haloarculaceae|g__Natronomonas|s__Natronomonas_moolapensis|t__SGB219
SGB	220	0	2	kSGB	Species	k__Archaea|p__Euryarchaeota|c__Halobacteria|o__Halobacteriales|f__Haloarculaceae|g__Halorhabdus|s__Halorhabdus_tiamatea|t__SGB220
SGB	221	0	1	kSGB	Species	k__Archaea|p__Euryarchaeota|c__Halobacteria|o__Halobacteriales|f__Haloarculaceae|g__Halorhabdus|s__Halorhabdus_utahensis|t__SGB221
SGB	222	0	1	kSGB	Species	k__Archaea|p__Euryarchaeota|c__Halobacteria|o__Halobacteriales|f__Haloarculaceae|g__Haloarcula|s__Haloarcula_japonica|t__SGB222
SGB	223	0	1	kSGB	Species	k__Archaea|p__Euryarchaeota|c__Halobacteria|o__Halobacteriales|f__Haloarculaceae|g__Haloarcula|s__Haloarcula_argentinensis|t__SGB223
SGB	224	0	3	kSGB	Species	k__Archaea|p__Euryarchaeota|c__Halobacteria|o__Halobacteriales|f__Haloarculaceae|g__Haloarcula|s__Haloarcula_marismortui|t__SGB224
SGB	225	0	5	kSGB	Species	k__Archaea|p__Euryarchaeota|c__Halobacteria|o__Halobacteriales|f__Haloarculaceae|g__Haloarcula|s__Haloarcula_hispanica|t__SGB225
SGB	226	0	2	kSGB	Species	k__Archaea|p__Euryarchaeota|c__Halobacteria|o__Halobacteriales|f__Haloarculaceae|g__Haloarcula|s__Haloarcula_vallismortis|t__SGB226
SGB	227	0	1	kSGB	Species	k__Archaea|p__Euryarchaeota|c__Halobacteria|o__Halobacteriales|f__Haloarculaceae|g__Haloarcula|s__Haloarcula_rubripromontorii|t__SGB227
SGB	228	0	1	kSGB	Species	k__Archaea|p__Euryarchaeota|c__Halobacteria|o__Halobacteriales|f__Haloarculaceae|g__Halorientalis|s__Halorientalis_regularis|t__SGB228
SGB	229	0	1	kSGB	Species	k__Archaea|p__Euryarchaeota|c__Halobacteria|o__Halobacteriales|f__Haloarculaceae|g__Halorientalis|s__Halorientalis_persicus|t__SGB229
SGB	230	0	1	kSGB	Species	k__Archaea|p__Euryarchaeota|c__Halobacteria|o__Halobacteriales|f__Haloarculaceae|g__Halorientalis|s__Halorientalis_sp_IM1011|t__SGB230
SGB	231	0	1	kSGB	Species	k__Archaea|p__Euryarchaeota|c__Halobacteria|o__Halobacteriales|f__Haloarculaceae|g__Halomicrobium|s__Halomicrobium_mukohataei|t__SGB231
SGB	232	0	1	kSGB	Species	k__Archaea|p__Euryarchaeota|c__Halobacteria|o__Halobacteriales|f__Haloarculaceae|g__Halomicrobium|s__Halomicrobium_zhouii|t__SGB232
SGB	233	0	1	kSGB	Species	k__Archaea|p__Euryarchaeota|c__Halobacteria|o__Halobacteriales|f__Haloarculaceae|g__Halosimplex|s__Halosimplex_carlsbadense|t__SGB233
SGB	234	0	2	kSGB	Species	k__Archaea|p__Euryarchaeota|c__Halobacteria|o__Halobacteriales|f__Halobacteriales_unclassified|g__Halobacteriales_unclassified|s__halophilic_archaeon_True_ADL|t__SGB234
SGB	235	0	1	kSGB	Species	k__Archaea|p__Euryarchaeota|c__Halobacteria|o__Haloferacales|f__Haloferacales_unclassified|g__Haloferacales_unclassified|s__halophilic_archaeon_DL31|t__SGB235
SGB	236	0	1	kSGB	Species	k__Archaea|p__Euryarchaeota|c__Halobacteria|o__Halobacteriales|f__Halobacteriaceae|g__Halobacterium|s__Halobacterium_sp_DL1|t__SGB236
SGB	237	0	2	kSGB	Species	k__Archaea|p__Euryarchaeota|c__Halobacteria|o__Haloferacales|f__Haloferacaceae|g__Haloferax|s__Haloferax_larsenii|t__SGB237
SGB	238	0	1	kSGB	Species	k__Archaea|p__Euryarchaeota|c__Halobacteria|o__Haloferacales|f__Haloferacaceae|g__Haloferax|s__Haloferax_elongans|t__SGB238
SGB	239	0	3	kSGB	Species	k__Archaea|p__Euryarchaeota|c__Halobacteria|o__Haloferacales|f__Haloferacaceae|g__Haloferax|s__Haloferax_mediterranei|t__SGB239
SGB	240	0	3	kSGB	Species	k__Archaea|p__Euryarchaeota|c__Halobacteria|o__Haloferacales|f__Haloferacaceae|g__Haloferax|s__Haloferax_gibbonsii|t__SGB240
SGB	241	0	8	kSGB	Species	k__Archaea|p__Euryarchaeota|c__Halobacteria|o__Haloferacales|f__Haloferacaceae|g__Haloferax|s__Haloferax_volcanii|t__SGB241
SGB	242	0	3	kSGB	Species	k__Archaea|p__Euryarchaeota|c__Halobacteria|o__Haloferacales|f__Haloferacaceae|g__Haloferax|s__Haloferax_denitrificans|t__SGB242
SGB	243	0	1	kSGB	Species	k__Archaea|p__Euryarchaeota|c__Halobacteria|o__Haloferacales|f__Haloferacaceae|g__Haloferax|s__Haloferax_sp_SB29|t__SGB243
SGB	244	0	1	kSGB	Species	k__Archaea|p__Euryarchaeota|c__Halobacteria|o__Haloferacales|f__Haloferacaceae|g__Halopelagius|s__Halopelagius_longus|t__SGB244
SGB	245	0	1	kSGB	Species	k__Archaea|p__Euryarchaeota|c__Halobacteria|o__Haloferacales|f__Haloferacaceae|g__Halopelagius|s__Halopelagius_inordinatus|t__SGB245
SGB	246	0	2	kSGB	Species	k__Archaea|p__Euryarchaeota|c__Halobacteria|o__Haloferacales|f__Haloferacaceae|g__Halogeometricum|s__Halogeometricum_borinquense|t__SGB246
SGB	247	0	1	kSGB	Species	k__Archaea|p__Euryarchaeota|c__Halobacteria|o__Haloferacales|f__Haloferacaceae|g__Halogeometricum|s__Halogeometricum_pallidum|t__SGB247
SGB	248	0	1	kSGB	Species	k__Archaea|p__Euryarchaeota|c__Halobacteria|o__Haloferacales|f__Haloferacaceae|g__Halogeometricum|s__Halogeometricum_rufum|t__SGB248
SGB	249	0	2	kSGB	Species	k__Archaea|p__Euryarchaeota|c__Halobacteria|o__Haloferacales|f__Haloferacaceae|g__Halogranum|s__Halogranum_salarium|t__SGB249
SGB	250	0	1	kSGB	Species	k__Archaea|p__Euryarchaeota|c__Halobacteria|o__Haloferacales|f__Haloferacaceae|g__Halogranum|s__Halogranum_amylolyticum|t__SGB250
SGB	251	0	1	kSGB	Species	k__Archaea|p__Euryarchaeota|c__Halobacteria|o__Haloferacales|f__Haloferacaceae|g__Halogranum|s__Halogranum_gelatinilyticum|t__SGB251
SGB	252	0	1	kSGB	Species	k__Archaea|p__Euryarchaeota|c__Halobacteria|o__Haloferacales|f__Haloferacaceae|g__Haloprofundus|s__Haloprofundus_marisrubri|t__SGB252
SGB	253	0	1	kSGB	Species	k__Archaea|p__Euryarchaeota|c__Halobacteria|o__Haloferacales|f__Halorubraceae|g__Salinigranum|s__Salinigranum_rubrum|t__SGB253
SGB	254	0	1	kSGB	Species	k__Archaea|p__Euryarchaeota|c__Halobacteria|o__Haloferacales|f__Haloferacaceae|g__Haloplanus|s__Haloplanus_vescus|t__SGB254
SGB	255	0	1	kSGB	Species	k__Archaea|p__Euryarchaeota|c__Halobacteria|o__Natrialbales|f__Natrialbaceae|g__Salinarchaeum|s__Salinarchaeum_sp_Harcht_Bsk1|t__SGB255
SGB	256	0	1	kSGB	Species	k__Archaea|p__Euryarchaeota|c__Halobacteria|o__Halobacteriales|f__Halobacteriaceae|g__Natronoarchaeum|s__Natronoarchaeum_philippinense|t__SGB256
SGB	257	0	2	kSGB	Species	k__Archaea|p__Euryarchaeota|c__Halobacteria|o__Halobacteriales|f__Halobacteriaceae|g__Halobacterium|s__Halobacterium_salinarum|t__SGB257
SGB	258	0	1	kSGB	Species	k__Archaea|p__Euryarchaeota|c__Halobacteria|o__Halobacteriales|f__Halobacteriaceae|g__Halobacterium|s__Halobacterium_hubeiense|t__SGB258
SGB	259	0	1	kSGB	Species	k__Archaea|p__Euryarchaeota|c__Halobacteria|o__Halobacteriales|f__Halobacteriaceae|g__Halobacterium|s__Halobacterium_jilantaiense|t__SGB259
SGB	260	0	1	kSGB	Species	k__Archaea|p__Euryarchaeota|c__Halobacteria|o__Halobacteriales|f__Halobacteriaceae|g__Halarchaeum|s__Halarchaeum_acidiphilum|t__SGB260
SGB	261	0	1	kSGB	Species	k__Archaea|p__Euryarchaeota|c__Halobacteria|o__Haloferacales|f__Haloferacaceae|g__Halobellus|s__Halobellus_clavatus|t__SGB261
SGB	262	0	1	kSGB	Species	k__Archaea|p__Euryarchaeota|c__Halobacteria|o__Haloferacales|f__Haloferacaceae|g__Halobellus|s__Halobellus_limi|t__SGB262
SGB	263	0	1	kSGB	Species	k__Archaea|p__Euryarchaeota|c__Halobacteria|o__Haloferacales|f__Halorubraceae|g__Candidatus_Halobonum|s__Candidatus_Halobonum_tyrrellensis|t__SGB263
SGB	264	0	1	kSGB	Species	k__Archaea|p__Euryarchaeota|c__Halobacteria|o__Haloferacales|f__Halorubraceae|g__Halobaculum|s__Halobaculum_gomorrense|t__SGB264
SGB	265	0	1	kSGB	Species	k__Archaea|p__Euryarchaeota|c__Halobacteria|o__Haloferacales|f__Halorubraceae|g__Halolamina|s__Halolamina_pelagica|t__SGB265
SGB	266	0	1	kSGB	Species	k__Archaea|p__Euryarchaeota|c__Halobacteria|o__Haloferacales|f__Halorubraceae|g__Halolamina|s__Halolamina_pelagica|t__SGB266
SGB	267	0	1	kSGB	Species	k__Archaea|p__Euryarchaeota|c__Halobacteria|o__Haloferacales|f__Halorubraceae|g__Halolamina|s__Halolamina_sp_CBA1230|t__SGB267
SGB	268	0	1	kSGB	Species	k__Archaea|p__Euryarchaeota|c__Halobacteria|o__Haloferacales|f__Halorubraceae|g__Halopenitus|s__Halopenitus_persicus|t__SGB268
SGB	269	0	1	kSGB	Species	k__Archaea|p__Euryarchaeota|c__Halobacteria|o__Haloferacales|f__Halorubraceae|g__Halopenitus|s__Halopenitus_malekzadehii|t__SGB269
SGB	270	0	2	kSGB	Species	k__Archaea|p__Euryarchaeota|c__Halobacteria|o__Haloferacales|f__Halorubraceae|g__Halorubrum|s__Halorubrum_hochstenium|t__SGB270
SGB	271	0	1	kSGB	Species	k__Archaea|p__Euryarchaeota|c__Halobacteria|o__Haloferacales|f__Halorubraceae|g__Halorubrum|s__Halorubrum_sp_AJ67|t__SGB271
SGB	272	0	11	kSGB	Species	k__Archaea|p__Euryarchaeota|c__Halobacteria|o__Haloferacales|f__Halorubraceae|g__Halorubrum|s__Halorubrum_ezzemoulense|t__SGB272
SGB	273	0	1	kSGB	Species	k__Archaea|p__Euryarchaeota|c__Halobacteria|o__Haloferacales|f__Halorubraceae|g__Halorubrum|s__Halorubrum_coriense|t__SGB273
SGB	274	0	8	kSGB	Species	k__Archaea|p__Euryarchaeota|c__Halobacteria|o__Haloferacales|f__Halorubraceae|g__Halorubrum|s__Halorubrum_distributum|t__SGB274
SGB	275	0	1	kSGB	Species	k__Archaea|p__Euryarchaeota|c__Halobacteria|o__Haloferacales|f__Halorubraceae|g__Halorubrum|s__Halorubrum_tropicale|t__SGB275
SGB	276	0	1	kSGB	Species	k__Archaea|p__Euryarchaeota|c__Halobacteria|o__Haloferacales|f__Halorubraceae|g__Halorubrum|s__Halorubrum_sodomense|t__SGB276
SGB	277	0	1	kSGB	Species	k__Archaea|p__Euryarchaeota|c__Halobacteria|o__Haloferacales|f__Halorubraceae|g__Halorubrum|s__Halorubrum_californiense|t__SGB277
SGB	278	0	5	kSGB	Species	k__Archaea|p__Euryarchaeota|c__Halobacteria|o__Haloferacales|f__Halorubraceae|g__Halorubrum|s__Halorubrum_sp_Ib24|t__SGB278
SGB	279	0	1	kSGB	Species	k__Archaea|p__Euryarchaeota|c__Halobacteria|o__Haloferacales|f__Halorubraceae|g__Halorubrum|s__Halorubrum_kocurii|t__SGB279
SGB	280	0	1	kSGB	Species	k__Archaea|p__Euryarchaeota|c__Halobacteria|o__Haloferacales|f__Halorubraceae|g__Halorubrum|s__Halorubrum_lipolyticum|t__SGB280
SGB	281	0	1	kSGB	Species	k__Archaea|p__Euryarchaeota|c__Halobacteria|o__Haloferacales|f__Halorubraceae|g__Halorubrum|s__Halorubrum_saccharovorum|t__SGB281
SGB	282	0	1	kSGB	Species	k__Archaea|p__Euryarchaeota|c__Halobacteria|o__Haloferacales|f__Halorubraceae|g__Halorubrum|s__Halorubrum_sp_WN019|t__SGB282
SGB	283	0	1	kSGB	Species	k__Archaea|p__Euryarchaeota|c__Halobacteria|o__Haloferacales|f__Halorubraceae|g__Halorubrum|s__Halorubrum_saccharovorum|t__SGB283
SGB	284	0	1	kSGB	Species	k__Archaea|p__Euryarchaeota|c__Halobacteria|o__Haloferacales|f__Halorubraceae|g__Halorubrum|s__Halorubrum_persicum|t__SGB284
SGB	285	0	1	kSGB	Species	k__Archaea|p__Euryarchaeota|c__Halobacteria|o__Haloferacales|f__Halorubraceae|g__Halorubrum|s__Halorubrum_lacusprofundi|t__SGB285
SGB	286	0	1	kSGB	Species	k__Archaea|p__Euryarchaeota|c__Halobacteria|o__Haloferacales|f__Halorubraceae|g__Halorubrum|s__Halorubrum_aidingense|t__SGB286
SGB	287	0	1	kSGB	Species	k__Archaea|p__Euryarchaeota|c__Halobacteria|o__Haloferacales|f__Halorubraceae|g__Halorubrum|s__Halorubrum_halodurans|t__SGB287
SGB	288	0	1	kSGB	Species	k__Archaea|p__Archaea_unclassified|c__Archaea_unclassified|o__Archaea_unclassified|f__Archaea_unclassified|g__Archaea_unclassified|s__uncultured_archaeon_A07HR67|t__SGB288
SGB	289	0	1	kSGB	Species	k__Archaea|p__Euryarchaeota|c__Halobacteria|o__Haloferacales|f__Halorubraceae|g__Halorubrum|s__Halorubrum_vacuolatum|t__SGB289
SGB	290	0	1	kSGB	Species	k__Archaea|p__Euryarchaeota|c__Halobacteria|o__Halobacteriales|f__Halobacteriaceae|g__Haloarchaeobius|s__Haloarchaeobius_iranensis|t__SGB290
SGB	291	0	1	kSGB	Species	k__Archaea|p__Euryarchaeota|c__Halobacteria|o__Natrialbales|f__Natrialbaceae|g__Halovivax|s__Halovivax_ruber|t__SGB291
SGB	292	0	1	kSGB	Species	k__Archaea|p__Euryarchaeota|c__Halobacteria|o__Natrialbales|f__Natrialbaceae|g__Halovivax|s__Halovivax_asiaticus|t__SGB292
SGB	293	0	1	kSGB	Species	k__Archaea|p__Euryarchaeota|c__Halobacteria|o__Natrialbales|f__Natrialbaceae|g__Halostagnicola|s__Halostagnicola_sp_A56|t__SGB293
SGB	294	0	1	kSGB	Species	k__Archaea|p__Euryarchaeota|c__Halobacteria|o__Natrialbales|f__Natrialbaceae|g__Halostagnicola|s__Halostagnicola_kamekurae|t__SGB294
SGB	295	0	1	kSGB	Species	k__Archaea|p__Euryarchaeota|c__Halobacteria|o__Natrialbales|f__Natrialbaceae|g__Halostagnicola|s__Halostagnicola_larsenii|t__SGB295
SGB	296	0	2	kSGB	Species	k__Archaea|p__Euryarchaeota|c__Halobacteria|o__Natrialbales|f__Natrialbaceae|g__Natrialba|s__Natrialba_aegyptia|t__SGB296
SGB	297	0	1	kSGB	Species	k__Archaea|p__Euryarchaeota|c__Halobacteria|o__Natrialbales|f__Natrialbaceae|g__Natrialba|s__Natrialba_asiatica|t__SGB297
SGB	298	0	2	kSGB	Species	k__Archaea|p__Euryarchaeota|c__Halobacteria|o__Natrialbales|f__Natrialbaceae|g__Natrialba|s__Natrialba_magadii|t__SGB298
SGB	299	0	1	kSGB	Species	k__Archaea|p__Euryarchaeota|c__Halobacteria|o__Natrialbales|f__Natrialbaceae|g__Natrialba|s__Natrialba_hulunbeirensis|t__SGB299
SGB	300	0	1	kSGB	Species	k__Archaea|p__Euryarchaeota|c__Halobacteria|o__Natrialbales|f__Natrialbaceae|g__Natrialba|s__Natrialba_sp_SSL1|t__SGB300
SGB	301	0	1	kSGB	Species	k__Archaea|p__Euryarchaeota|c__Halobacteria|o__Natrialbales|f__Natrialbaceae|g__Natrialba|s__Natrialba_chahannaoensis|t__SGB301
SGB	302	0	2	kSGB	Species	k__Archaea|p__Euryarchaeota|c__Halobacteria|o__Natrialbales|f__Natrialbaceae|g__Haloterrigena|s__Haloterrigena_daqingensis|t__SGB302
SGB	303	0	1	kSGB	Species	k__Archaea|p__Euryarchaeota|c__Halobacteria|o__Natrialbales|f__Natrialbaceae|g__Natronorubrum|s__Natronorubrum_sediminis|t__SGB303
SGB	304	0	3	kSGB	Species	k__Archaea|p__Euryarchaeota|c__Halobacteria|o__Natrialbales|f__Natrialbaceae|g__Halobiforma|s__Halobiforma_lacisalsi|t__SGB304
SGB	305	0	4	kSGB	Species	k__Archaea|p__Euryarchaeota|c__Halobacteria|o__Natrialbales|f__Natrialbaceae|g__Natronobacterium|s__Natronobacterium_gregoryi|t__SGB305
SGB	306	0	1	kSGB	Species	k__Archaea|p__Euryarchaeota|c__Halobacteria|o__Natrialbales|f__Natrialbaceae|g__Natronobacterium|s__Natronobacterium_texcoconense|t__SGB306
SGB	307	0	1	kSGB	Species	k__Archaea|p__Euryarchaeota|c__Halobacteria|o__Natrialbales|f__Natrialbaceae|g__Halobiforma|s__Halobiforma_nitratireducens|t__SGB307
SGB	308	0	1	kSGB	Species	k__Archaea|p__Euryarchaeota|c__Halobacteria|o__Natrialbales|f__Natrialbaceae|g__Natronococcus|s__Natronococcus_occultus|t__SGB308
SGB	309	0	1	kSGB	Species	k__Archaea|p__Euryarchaeota|c__Halobacteria|o__Natrialbales|f__Natrialbaceae|g__Natronococcus|s__Natronococcus_amylolyticus|t__SGB309
SGB	310	0	1	kSGB	Species	k__Archaea|p__Euryarchaeota|c__Halobacteria|o__Natrialbales|f__Natrialbaceae|g__Natronococcus|s__Natronococcus_jeotgali|t__SGB310
SGB	311	0	1	kSGB	Species	k__Archaea|p__Euryarchaeota|c__Halobacteria|o__Natrialbales|f__Natrialbaceae|g__Natronorubrum|s__Natronorubrum_bangense|t__SGB311
SGB	312	0	1	kSGB	Species	k__Archaea|p__Euryarchaeota|c__Halobacteria|o__Natrialbales|f__Natrialbaceae|g__Natronorubrum|s__Natronorubrum_sulfidifaciens|t__SGB312
SGB	313	0	1	kSGB	Species	k__Archaea|p__Euryarchaeota|c__Halobacteria|o__Natrialbales|f__Natrialbaceae|g__Natronorubrum|s__Natronorubrum_thiooxidans|t__SGB313
SGB	314	0	1	kSGB	Species	k__Archaea|p__Euryarchaeota|c__Halobacteria|o__Natrialbales|f__Natrialbaceae|g__Haloterrigena|s__Haloterrigena_limicola|t__SGB314
SGB	315	0	1	kSGB	Species	k__Archaea|p__Euryarchaeota|c__Halobacteria|o__Natrialbales|f__Natrialbaceae|g__Haloterrigena|s__Haloterrigena_hispanica|t__SGB315
SGB	316	0	1	kSGB	Species	k__Archaea|p__Euryarchaeota|c__Halobacteria|o__Natrialbales|f__Natrialbaceae|g__Natrinema|s__Natrinema_versiforme|t__SGB316
SGB	317	0	1	kSGB	Species	k__Archaea|p__Euryarchaeota|c__Halobacteria|o__Natrialbales|f__Natrialbaceae|g__Natrinema|s__Natrinema_sp_CBA1119|t__SGB317
SGB	318	0	1	kSGB	Species	k__Archaea|p__Euryarchaeota|c__Halobacteria|o__Natrialbales|f__Natrialbaceae|g__Natrinema|s__Natrinema_ejinorense|t__SGB318
SGB	319	0	1	kSGB	Species	k__Archaea|p__Euryarchaeota|c__Halobacteria|o__Natrialbales|f__Natrialbaceae|g__Natrinema|s__Natrinema_salaciae|t__SGB319
SGB	320	0	2	kSGB	Species	k__Archaea|p__Euryarchaeota|c__Halobacteria|o__Natrialbales|f__Natrialbaceae|g__Natrinema|s__Natrinema_sp_J7_2|t__SGB320
SGB	321	0	1	kSGB	Species	k__Archaea|p__Euryarchaeota|c__Halobacteria|o__Natrialbales|f__Natrialbaceae|g__Natrinema|s__Natrinema_altunense|t__SGB321
SGB	322	0	1	kSGB	Species	k__Archaea|p__Euryarchaeota|c__Halobacteria|o__Natrialbales|f__Natrialbaceae|g__Natrinema|s__Natrinema_pallidum|t__SGB322
SGB	323	0	3	kSGB	Species	k__Archaea|p__Euryarchaeota|c__Halobacteria|o__Natrialbales|f__Natrialbaceae|g__Natrinema|s__Natrinema_pellirubrum|t__SGB323
SGB	324	0	1	kSGB	Species	k__Archaea|p__Euryarchaeota|c__Halobacteria|o__Natrialbales|f__Natrialbaceae|g__Haloterrigena|s__Haloterrigena_mahii|t__SGB324
SGB	325	0	1	kSGB	Species	k__Archaea|p__Euryarchaeota|c__Halobacteria|o__Natrialbales|f__Natrialbaceae|g__Haloterrigena|s__Haloterrigena_saccharevitans|t__SGB325
SGB	326	0	1	kSGB	Species	k__Archaea|p__Euryarchaeota|c__Halobacteria|o__Natrialbales|f__Natrialbaceae|g__Halopiger|s__Halopiger_salifodinae|t__SGB326
SGB	327	0	1	kSGB	Species	k__Archaea|p__Euryarchaeota|c__Halobacteria|o__Natrialbales|f__Natrialbaceae|g__Natronorubrum|s__Natronorubrum_tibetense|t__SGB327
SGB	328	0	1	kSGB	Species	k__Archaea|p__Euryarchaeota|c__Halobacteria|o__Natrialbales|f__Natrialbaceae|g__Natronorubrum|s__Natronorubrum_texcoconense|t__SGB328
SGB	329	0	1	kSGB	Species	k__Archaea|p__Euryarchaeota|c__Halobacteria|o__Natrialbales|f__Natrialbaceae|g__Haloterrigena|s__Haloterrigena_turkmenica|t__SGB329
SGB	330	0	1	kSGB	Species	k__Archaea|p__Euryarchaeota|c__Halobacteria|o__Natrialbales|f__Natrialbaceae|g__Haloterrigena|s__Haloterrigena_salina|t__SGB330
SGB	331	0	1	kSGB	Species	k__Archaea|p__Euryarchaeota|c__Halobacteria|o__Natrialbales|f__Natrialbaceae|g__Natronolimnobius|s__Natronolimnobius_innermongolicus|t__SGB331
SGB	332	0	1	kSGB	Species	k__Archaea|p__Euryarchaeota|c__Halobacteria|o__Natrialbales|f__Natrialbaceae|g__Halopiger|s__Halopiger_xanaduensis|t__SGB332
SGB	333	0	1	kSGB	Species	k__Archaea|p__Euryarchaeota|c__Halobacteria|o__Natrialbales|f__Natrialbaceae|g__Natronolimnobius|s__Natronolimnobius_baerhuensis|t__SGB333
SGB	334	0	2	kSGB	Species	k__Archaea|p__Euryarchaeota|c__Halobacteria|o__Halobacteriales|f__Halobacteriaceae|g__Halalkalicoccus|s__Halalkalicoccus_jeotgali|t__SGB334
SGB	335	0	1	kSGB	Species	k__Archaea|p__Euryarchaeota|c__Halobacteria|o__Halobacteriales|f__Halobacteriaceae|g__Halalkalicoccus|s__Halalkalicoccus_paucihalophilus|t__SGB335
SGB	336	0	1	kSGB	Species	k__Archaea|p__Euryarchaeota|c__Halobacteria|o__Halobacteriales|f__Halococcaceae|g__Halococcus|s__Halococcus_morrhuae|t__SGB336
SGB	337	0	1	kSGB	Species	k__Archaea|p__Euryarchaeota|c__Halobacteria|o__Halobacteriales|f__Halococcaceae|g__Halococcus|s__Halococcus_thailandensis|t__SGB337
SGB	338	0	1	kSGB	Species	k__Archaea|p__Euryarchaeota|c__Halobacteria|o__Halobacteriales|f__Halococcaceae|g__Halococcus|s__Halococcus_saccharolyticus|t__SGB338
SGB	339	0	1	kSGB	Species	k__Archaea|p__Euryarchaeota|c__Halobacteria|o__Halobacteriales|f__Halococcaceae|g__Halococcus|s__Halococcus_salifodinae|t__SGB339
SGB	340	0	1	kSGB	Species	k__Archaea|p__Euryarchaeota|c__Halobacteria|o__Halobacteriales|f__Halococcaceae|g__Halococcus|s__Halococcus_hamelinensis|t__SGB340
SGB	343	0	1	kSGB	Species	k__Archaea|p__Crenarchaeota|c__Thermoprotei|o__Thermoproteales|f__Thermofilaceae|g__Thermofilum|s__Thermofilum_sp_ex4484_79|t__SGB343
SGB	344	0	1	kSGB	Species	k__Archaea|p__Euryarchaeota|c__Thermoplasmata|o__Thermoplasmatales|f__Ferroplasmaceae|g__Ferroplasma|s__Ferroplasma_sp_Type_II|t__SGB344
SGB	345	0	2	kSGB	Species	k__Archaea|p__Euryarchaeota|c__Thermoplasmata|o__Thermoplasmatales|f__Ferroplasmaceae|g__Ferroplasma|s__Ferroplasma_acidarmanus|t__SGB345
SGB	346	0	4	kSGB	Species	k__Archaea|p__Euryarchaeota|c__Thermoplasmata|o__Thermoplasmatales|f__Ferroplasmaceae|g__Acidiplasma|s__Acidiplasma_aeolicum|t__SGB346
SGB	347	0	2	kSGB	Species	k__Archaea|p__Euryarchaeota|c__Thermoplasmata|o__Thermoplasmatales|f__Picrophilaceae|g__Picrophilus|s__Picrophilus_torridus|t__SGB347
SGB	348	0	4	kSGB	Species	k__Archaea|p__Euryarchaeota|c__Thermoplasmata|o__Thermoplasmatales|f__Cuniculiplasmataceae|g__Cuniculiplasma|s__Cuniculiplasma_divulgatum|t__SGB348
SGB	349	0	1	kSGB	Species	k__Archaea|p__Euryarchaeota|c__Thermoplasmata|o__Thermoplasmatales|f__Thermoplasmatales_unclassified|g__Thermoplasmatales_unclassified|s__Thermoplasmatales_archaeon_A_plasma|t__SGB349
SGB	352	0	1	kSGB	Species	k__Archaea|p__Euryarchaeota|c__Thermoplasmata|o__Thermoplasmatales|f__Thermoplasmataceae|g__Thermoplasma|s__Thermoplasma_volcanium|t__SGB352
SGB	353	0	1	kSGB	Species	k__Archaea|p__Euryarchaeota|c__Thermoplasmata|o__Thermoplasmatales|f__Thermoplasmatales_unclassified|g__Thermoplasmatales_unclassified|s__Thermoplasmatales_archaeon_I_plasma|t__SGB353
SGB	354	0	1	kSGB	Species	k__Archaea|p__Euryarchaeota|c__Thermoplasmata|o__Thermoplasmatales|f__Thermoplasmataceae|g__Thermoplasma|s__Thermoplasma_acidophilum|t__SGB354
SGB	355	0	1	kSGB	Species	k__Archaea|p__Euryarchaeota|c__Thermoplasmata|o__Thermoplasmatales|f__Thermoplasmatales_unclassified|g__Thermoplasmatales_unclassified|s__Thermoplasmatales_archaeon_B_DKE|t__SGB355
SGB	356	0	1	kSGB	Species	k__Archaea|p__Euryarchaeota|c__Thermoplasmata|o__Thermoplasmatales|f__Thermoplasmatales_unclassified|g__Thermoplasmatales_unclassified|s__Thermoplasmatales_archaeon_E_plasma|t__SGB356
SGB	360	0	2	kSGB	Species	k__Archaea|p__Candidatus_Woesearchaeota|c__Candidatus_Woesearchaeota_unclassified|o__Candidatus_Woesearchaeota_unclassified|f__Candidatus_Woesearchaeota_unclassified|g__Candidatus_Woesearchaeota_unclassified|s__Candidatus_Woesearchaeota_archaeon_CG10_big_fil_rev_8_21_14_0_10_33_12|t__SGB360
SGB	361	0	1	kSGB	Species	k__Archaea|p__Candidatus_Diapherotrites|c__Candidatus_Diapherotrites_unclassified|o__Candidatus_Diapherotrites_unclassified|f__Candidatus_Diapherotrites_unclassified|g__Candidatus_Diapherotrites_unclassified|s__Candidatus_Diapherotrites_archaeon_CG09_land_8_20_14_0_10_32_12|t__SGB361
SGB	362	3	0	uSGB	Family	k__Archaea|p__Euryarchaeota|c__Thermoplasmata|o__Methanomassiliicoccales|f__Methanomassiliicoccaceae|g__GGB260|s__GGB260_SGB362|t__SGB362
SGB	363	11	1	kSGB	Species	k__Archaea|p__Euryarchaeota|c__Thermoplasmata|o__Methanomassiliicoccales|f__Methanomassiliicoccaceae|g__Methanomassiliicoccus|s__Candidatus_Methanomassiliicoccus_intestinalis|t__SGB363
SGB	364	1	0	uSGB	Genus	k__Archaea|p__Euryarchaeota|c__Thermoplasmata|o__Methanomassiliicoccales|f__Methanomassiliicoccaceae|g__Methanomassiliicoccus|s__Methanomassiliicoccus_SGB364|t__SGB364
SGB	368	0	1	kSGB	Species	k__Archaea|p__Euryarchaeota|c__Thermoplasmata|o__Methanomassiliicoccales|f__Methanomassiliicoccales_unclassified|g__Methanomassiliicoccales_unclassified|s__Methanomassiliicoccales_archaeon_RumEn_M1|t__SGB368
SGB	372	19	0	uSGB	Other	k__Archaea|p__Euryarchaeota|c__CFGB117|o__OFGB117|f__FGB117|g__GGB267|s__GGB267_SGB372|t__SGB372
SGB	376	23	0	uSGB	Family	k__Archaea|p__Euryarchaeota|c__Thermoplasmata|o__Methanomassiliicoccales|f__Methanomassiliicoccaceae|g__GGB269|s__GGB269_SGB376|t__SGB376
SGB	378	1	0	uSGB	Family	k__Archaea|p__Euryarchaeota|c__Thermoplasmata|o__Methanomassiliicoccales|f__Methanomassiliicoccaceae|g__GGB271|s__GGB271_SGB378|t__SGB378
SGB	380	9	0	uSGB	Family	k__Archaea|p__Euryarchaeota|c__Thermoplasmata|o__Methanomassiliicoccales|f__Methanomassiliicoccaceae|g__GGB273|s__GGB273_SGB380|t__SGB380
SGB	381	4	0	uSGB	Family	k__Archaea|p__Euryarchaeota|c__Thermoplasmata|o__Methanomassiliicoccales|f__Methanomassiliicoccaceae|g__GGB273|s__GGB273_SGB381|t__SGB381
SGB	382	1	0	uSGB	Family	k__Archaea|p__Euryarchaeota|c__Thermoplasmata|o__Methanomassiliicoccales|f__Methanomassiliicoccaceae|g__GGB273|s__GGB273_SGB382|t__SGB382
SGB	384	1	0	uSGB	Family	k__Archaea|p__Euryarchaeota|c__Thermoplasmata|o__Methanomassiliicoccales|f__Methanomassiliicoccaceae|g__GGB275|s__GGB275_SGB384|t__SGB384
SGB	385	17	2	kSGB	Species	k__Archaea|p__Euryarchaeota|c__Thermoplasmata|o__Methanomassiliicoccales|f__Methanomassiliicoccaceae|g__Candidatus_Methanomethylophilus|s__Candidatus_Methanomethylophilus_alvus|t__SGB385
SGB	387	0	1	kSGB	Species	k__Archaea|p__Euryarchaeota|c__Thermoplasmata|o__Methanomassiliicoccales|f__Methanomassiliicoccaceae|g__Candidatus_Methanomethylophilus|s__Candidatus_Methanomethylophilus_sp_1R26|t__SGB387
SGB	388	0	1	kSGB	Species	k__Archaea|p__Euryarchaeota|c__Thermoplasmata|o__Thermoplasmatales|f__Thermoplasmatales_unclassified|g__Thermoplasmatales_unclassified|s__Thermoplasmatales_archaeon_BRNA1|t__SGB388
SGB	389	0	1	kSGB	Species	k__Archaea|p__Euryarchaeota|c__Thermoplasmata|o__Thermoplasmata_unclassified|f__Thermoplasmata_unclassified|g__Thermoplasmata_unclassified|s__methanogenic_archaeon_ISO4_H5|t__SGB389
SGB	394	0	1	kSGB	Species	k__Archaea|p__Euryarchaeota|c__Thermoplasmata|o__Methanomassiliicoccales|f__Methanomassiliicoccales_unclassified|g__Methanomassiliicoccales_unclassified|s__Methanomassiliicoccales_archaeon_RumEn_M2|t__SGB394
SGB	396	0	1	kSGB	Species	k__Archaea|p__Euryarchaeota|c__Thermoplasmata|o__Methanomassiliicoccales|f__Methanomassiliicoccaceae|g__Candidatus_Methanoplasma|s__Candidatus_Methanoplasma_termitum|t__SGB396
SGB	398	0	1	kSGB	Species	k__Bacteria|p__Proteobacteria|c__Gammaproteobacteria|o__Chromatiales|f__Woeseiaceae|g__Woeseia|s__Woeseia_sp|t__SGB398
SGB	402	0	1	kSGB	Species	k__Archaea|p__Euryarchaeota|c__Euryarchaeota_unclassified|o__Euryarchaeota_unclassified|f__Euryarchaeota_unclassified|g__Euryarchaeota_unclassified|s__Euryarchaeota_archaeon|t__SGB402
SGB	404	0	1	kSGB	Species	k__Bacteria|p__Proteobacteria|c__Gammaproteobacteria|o__Gammaproteobacteria_unclassified|f__Gammaproteobacteria_unclassified|g__Gammaproteobacteria_unclassified|s__Gammaproteobacteria_bacterium|t__SGB404
SGB	419	0	1	kSGB	Species	k__Archaea|p__Euryarchaeota|c__Euryarchaeota_unclassified|o__Euryarchaeota_unclassified|f__Euryarchaeota_unclassified|g__Euryarchaeota_unclassified|s__Marine_Group_II_euryarchaeote_MED_G36|t__SGB419
SGB	428	0	1	kSGB	Species	k__Archaea|p__Euryarchaeota|c__Euryarchaeota_unclassified|o__Euryarchaeota_unclassified|f__Euryarchaeota_unclassified|g__Euryarchaeota_unclassified|s__Euryarchaeota_archaeon|t__SGB428
SGB	430	0	1	kSGB	Species	k__Archaea|p__Euryarchaeota|c__Euryarchaeota_unclassified|o__Euryarchaeota_unclassified|f__Euryarchaeota_unclassified|g__Euryarchaeota_unclassified|s__Euryarchaeota_archaeon|t__SGB430
SGB	431	0	1	kSGB	Species	k__Archaea|p__Euryarchaeota|c__Euryarchaeota_unclassified|o__Euryarchaeota_unclassified|f__Euryarchaeota_unclassified|g__Euryarchaeota_unclassified|s__Euryarchaeota_archaeon|t__SGB431
SGB	432	0	1	kSGB	Species	k__Archaea|p__Euryarchaeota|c__Euryarchaeota_unclassified|o__Euryarchaeota_unclassified|f__Euryarchaeota_unclassified|g__Euryarchaeota_unclassified|s__Euryarchaeota_archaeon|t__SGB432
SGB	435	0	1	kSGB	Species	k__Archaea|p__Euryarchaeota|c__Euryarchaeota_unclassified|o__Euryarchaeota_unclassified|f__Euryarchaeota_unclassified|g__Euryarchaeota_unclassified|s__Euryarchaeota_archaeon|t__SGB435
SGB	440	0	1	kSGB	Species	k__Archaea|p__Euryarchaeota|c__Euryarchaeota_unclassified|o__Euryarchaeota_unclassified|f__Euryarchaeota_unclassified|g__Euryarchaeota_unclassified|s__Euryarchaeota_archaeon|t__SGB440
SGB	442	0	2	kSGB	Species	k__Archaea|p__Euryarchaeota|c__Euryarchaeota_unclassified|o__Euryarchaeota_unclassified|f__Euryarchaeota_unclassified|g__Euryarchaeota_unclassified|s__Euryarchaeota_archaeon|t__SGB442
SGB	446	0	1	kSGB	Species	k__Archaea|p__Euryarchaeota|c__Euryarchaeota_unclassified|o__Euryarchaeota_unclassified|f__Euryarchaeota_unclassified|g__Euryarchaeota_unclassified|s__Euryarchaeota_archaeon_TMED215|t__SGB446
SGB	450	0	1	kSGB	Species	k__Archaea|p__Euryarchaeota|c__Euryarchaeota_unclassified|o__Euryarchaeota_unclassified|f__Euryarchaeota_unclassified|g__Euryarchaeota_unclassified|s__Euryarchaeota_archaeon|t__SGB450
SGB	452	0	1	kSGB	Species	k__Archaea|p__Euryarchaeota|c__Euryarchaeota_unclassified|o__Euryarchaeota_unclassified|f__Euryarchaeota_unclassified|g__Euryarchaeota_unclassified|s__Euryarchaeota_archaeon|t__SGB452
SGB	460	0	1	kSGB	Species	k__Archaea|p__Euryarchaeota|c__Euryarchaeota_unclassified|o__Euryarchaeota_unclassified|f__Euryarchaeota_unclassified|g__Euryarchaeota_unclassified|s__Euryarchaeota_archaeon|t__SGB460
SGB	461	0	1	kSGB	Species	k__Archaea|p__Euryarchaeota|c__Euryarchaeota_unclassified|o__Euryarchaeota_unclassified|f__Euryarchaeota_unclassified|g__Euryarchaeota_unclassified|s__Marine_Group_II_euryarchaeote_MED_G34|t__SGB461
SGB	469	0	1	kSGB	Species	k__Archaea|p__Euryarchaeota|c__Euryarchaeota_unclassified|o__Euryarchaeota_unclassified|f__Euryarchaeota_unclassified|g__Euryarchaeota_unclassified|s__Euryarchaeota_archaeon|t__SGB469
SGB	472	0	1	kSGB	Species	k__Archaea|p__Euryarchaeota|c__Euryarchaeota_unclassified|o__Euryarchaeota_unclassified|f__Euryarchaeota_unclassified|g__Euryarchaeota_unclassified|s__Euryarchaeota_archaeon|t__SGB472
SGB	485	0	1	kSGB	Species	k__Archaea|p__Euryarchaeota|c__Euryarchaeota_unclassified|o__Euryarchaeota_unclassified|f__Euryarchaeota_unclassified|g__Euryarchaeota_unclassified|s__Euryarchaeota_archaeon_TMED279|t__SGB485
SGB	515	0	1	kSGB	Species	k__Bacteria|p__Verrucomicrobia|c__Verrucomicrobiae|o__Verrucomicrobiales|f__Verrucomicrobiales_unclassified|g__Verrucomicrobiales_unclassified|s__Verrucomicrobiales_bacterium|t__SGB515
SGB	517	0	1	kSGB	Species	k__Archaea|p__Candidatus_Woesearchaeota|c__Candidatus_Woesearchaeota_unclassified|o__Candidatus_Woesearchaeota_unclassified|f__Candidatus_Woesearchaeota_unclassified|g__Candidatus_Woesearchaeota_unclassified|s__Candidatus_Woesearchaeota_archaeon|t__SGB517
SGB	521	0	2	kSGB	Species	k__Bacteria|p__Candidatus_Shapirobacteria|c__Candidatus_Shapirobacteria_unclassified|o__Candidatus_Shapirobacteria_unclassified|f__Candidatus_Shapirobacteria_unclassified|g__Candidatus_Shapirobacteria_unclassified|s__Candidatus_Shapirobacteria_bacterium_CG09_land_8_20_14_0_10_49_15|t__SGB521
SGB	523	0	1	kSGB	Species	k__Bacteria|p__Planctomycetes|c__Phycisphaerae|o__Phycisphaerales|f__Phycisphaeraceae|g__Phycisphaeraceae_unclassified|s__Phycisphaeraceae_bacterium|t__SGB523
SGB	525	0	1	kSGB	Species	k__Bacteria|p__Proteobacteria|c__Deltaproteobacteria|o__Desulfobacterales|f__Desulfobacteraceae|g__Desulfobacteraceae_unclassified|s__Desulfobacteraceae_bacterium_4572_88|t__SGB525
SGB	529	0	1	kSGB	Species	k__Bacteria|p__Firmicutes|c__Clostridia|o__Clostridia_unclassified|f__Clostridia_unclassified|g__Clostridia_unclassified|s__Clostridia_bacterium_41_269|t__SGB529
SGB	531	0	1	kSGB	Species	k__Bacteria|p__Firmicutes|c__Clostridia|o__Clostridiales|f__Syntrophomonadaceae|g__Dethiobacter|s__Dethiobacter_alkaliphilus|t__SGB531
SGB	535	0	1	kSGB	Species	k__Bacteria|p__Chloroflexi|c__Chloroflexi_unclassified|o__Chloroflexi_unclassified|f__Chloroflexi_unclassified|g__Chloroflexi_unclassified|s__Chloroflexi_bacterium_RBG_13_46_9|t__SGB535
SGB	536	0	1	kSGB	Species	k__Bacteria|p__Chloroflexi|c__Chloroflexi_unclassified|o__Chloroflexi_unclassified|f__Chloroflexi_unclassified|g__Chloroflexi_unclassified|s__Chloroflexi_bacterium_RBG_16_48_8|t__SGB536
SGB	537	0	1	kSGB	Species	k__Bacteria|p__Proteobacteria|c__Proteobacteria_unclassified|o__Proteobacteria_unclassified|f__Proteobacteria_unclassified|g__Proteobacteria_unclassified|s__Proteobacteria_bacterium|t__SGB537
SGB	541	0	1	kSGB	Species	k__Archaea|p__Thaumarchaeota|c__Thaumarchaeota_unclassified|o__Cenarchaeales|f__Cenarchaeaceae|g__Cenarchaeum|s__Cenarchaeum_symbiosum|t__SGB541
SGB	544	0	1	kSGB	Species	k__Archaea|p__Thaumarchaeota|c__Thaumarchaeota_unclassified|o__Thaumarchaeota_unclassified|f__Thaumarchaeota_unclassified|g__Candidatus_Nitrosopelagicus|s__Candidatus_Nitrosopelagicus_brevis|t__SGB544
SGB	545	0	1	kSGB	Species	k__Bacteria|p__Nitrospinae|c__Nitrospinia|o__Nitrospinales|f__Nitrospinaceae|g__Nitrospina|s__Nitrospina_sp|t__SGB545
SGB	547	0	1	kSGB	Species	k__Archaea|p__Thaumarchaeota|c__Thaumarchaeota_unclassified|o__Thaumarchaeota_unclassified|f__Thaumarchaeota_unclassified|g__Thaumarchaeota_unclassified|s__Thaumarchaeota_archaeon_N4|t__SGB547
SGB	548	0	1	kSGB	Species	k__Archaea|p__Thaumarchaeota|c__Thaumarchaeota_unclassified|o__Thaumarchaeota_unclassified|f__Thaumarchaeota_unclassified|g__Candidatus_Nitrosotalea|s__Candidatus_Nitrosotalea_devanaterra|t__SGB548
SGB	549	0	1	kSGB	Species	k__Archaea|p__Thaumarchaeota|c__Thaumarchaeota_unclassified|o__Thaumarchaeota_unclassified|f__Thaumarchaeota_unclassified|g__Candidatus_Nitrosotalea|s__Nitrosotalea_sp_CS|t__SGB549
SGB	550	0	1	kSGB	Species	k__Archaea|p__Thaumarchaeota|c__Thaumarchaeota_unclassified|o__Thaumarchaeota_unclassified|f__Thaumarchaeota_unclassified|g__Candidatus_Nitrosotalea|s__Nitrosotalea_sp_Nd2|t__SGB550
SGB	552	0	2	kSGB	Species	k__Archaea|p__Thaumarchaeota|c__Thaumarchaeota_unclassified|o__Nitrosopumilales|f__Nitrosopumilaceae|g__Candidatus_Nitrosoarchaeum|s__Candidatus_Nitrosoarchaeum_limnia|t__SGB552
SGB	553	0	2	kSGB	Species	k__Archaea|p__Thaumarchaeota|c__Thaumarchaeota_unclassified|o__Nitrosopumilales|f__Nitrosopumilales_archaeon_CG_4_10_14_0_8_um_filter_34_8_unclassified|g__Nitrosopumilales_archaeon_CG_4_10_14_0_8_um_filter_34_8_unclassified|s__Nitrosopumilales_archaeon_CG_4_10_14_0_8_um_filter_34_8|t__SGB553
SGB	554	0	1	kSGB	Species	k__Archaea|p__Thaumarchaeota|c__Thaumarchaeota_unclassified|o__Nitrosopumilales|f__Nitrosopumilaceae|g__Candidatus_Nitrosoarchaeum|s__Candidatus_Nitrosoarchaeum_koreensis|t__SGB554
SGB	555	0	5	kSGB	Species	k__Archaea|p__Thaumarchaeota|c__Thaumarchaeota_unclassified|o__Thaumarchaeota_unclassified|f__Thaumarchaeota_unclassified|g__Thaumarchaeota_unclassified|s__Marine_Group_I_thaumarchaeote_SCGC_AAA799_N04|t__SGB555
SGB	556	0	1	kSGB	Species	k__Archaea|p__Thaumarchaeota|c__Thaumarchaeota_unclassified|o__Thaumarchaeota_unclassified|f__Thaumarchaeota_unclassified|g__Thaumarchaeota_unclassified|s__Marine_Group_I_thaumarchaeote_SCGC_AAA799_P11|t__SGB556
SGB	557	0	1	kSGB	Species	k__Archaea|p__Thaumarchaeota|c__Thaumarchaeota_unclassified|o__Nitrosopumilales|f__Nitrosopumilaceae|g__Nitrosopumilus|s__Nitrosopumilus_maritimus|t__SGB557
SGB	558	0	1	kSGB	Species	k__Archaea|p__Thaumarchaeota|c__Thaumarchaeota_unclassified|o__Nitrosopumilales|f__Nitrosopumilaceae|g__Nitrosopumilus|s__Candidatus_Nitrosopumilus_koreensis|t__SGB558
SGB	559	0	1	kSGB	Species	k__Archaea|p__Thaumarchaeota|c__Thaumarchaeota_unclassified|o__Nitrosopumilales|f__Nitrosopumilaceae|g__Nitrosopumilus|s__Candidatus_Nitrosopumilus_piranensis|t__SGB559
SGB	560	0	1	kSGB	Species	k__Archaea|p__Thaumarchaeota|c__Thaumarchaeota_unclassified|o__Nitrosopumilales|f__Nitrosopumilaceae|g__Nitrosopumilus|s__Candidatus_Nitrosopumilus_salaria|t__SGB560
SGB	561	0	1	kSGB	Species	k__Archaea|p__Thaumarchaeota|c__Thaumarchaeota_unclassified|o__Nitrosopumilales|f__Nitrosopumilaceae|g__Nitrosopumilus|s__Candidatus_Nitrosopumilus_adriaticus|t__SGB561
SGB	562	0	1	kSGB	Species	k__Archaea|p__Thaumarchaeota|c__Thaumarchaeota_unclassified|o__Nitrosopumilales|f__Nitrosopumilaceae|g__Nitrosopumilus|s__Candidatus_Nitrosopumilus_sediminis|t__SGB562
SGB	563	0	1	kSGB	Species	k__Archaea|p__Thaumarchaeota|c__Thaumarchaeota_unclassified|o__Thaumarchaeota_unclassified|f__Thaumarchaeota_unclassified|g__Thaumarchaeota_unclassified|s__Thaumarchaeota_archaeon|t__SGB563
SGB	565	0	1	kSGB	Species	k__Archaea|p__Thaumarchaeota|c__Thaumarchaeota_unclassified|o__Nitrosopumilales|f__Nitrosopumilaceae|g__Nitrosopumilus|s__Nitrosopumilus_sp_PRT_SC01|t__SGB565
SGB	566	0	1	kSGB	Species	k__Archaea|p__Candidatus_Heimdallarchaeota|c__Candidatus_Heimdallarchaeota_unclassified|o__Candidatus_Heimdallarchaeota_unclassified|f__Candidatus_Heimdallarchaeota_unclassified|g__Candidatus_Heimdallarchaeota_unclassified|s__Candidatus_Heimdallarchaeota_archaeon_AB_125|t__SGB566
SGB	568	2	0	uSGB	Other	k__Bacteria|p__Firmicutes|c__CFGB172|o__OFGB172|f__FGB172|g__GGB420|s__GGB420_SGB568|t__SGB568
SGB	572	0	1	kSGB	Species	k__Bacteria|p__Candidatus_Omnitrophica|c__Candidatus_Omnitrophica_unclassified|o__Candidatus_Omnitrophica_unclassified|f__Candidatus_Omnitrophica_unclassified|g__Candidatus_Omnitrophica_unclassified|s__Omnitrophica_WOR_2_bacterium_RBG_13_44_8|t__SGB572
SGB	576	0	5	kSGB	Species	k__Bacteria|p__Proteobacteria|c__Oligoflexia|o__Bdellovibrionales|f__Bdellovibrionales_unclassified|g__Bdellovibrionales_unclassified|s__Bdellovibrionales_bacterium_RIFOXYC1_FULL_39_130|t__SGB576
SGB	578	0	2	kSGB	Species	k__Bacteria|p__Proteobacteria|c__Gammaproteobacteria|o__Cellvibrionales|f__Porticoccaceae|g__Porticoccaceae_unclassified|s__Porticoccaceae_bacterium|t__SGB578
SGB	580	0	5	kSGB	Species	k__Bacteria|p__Proteobacteria|c__Gammaproteobacteria|o__Cellvibrionales|f__Porticoccaceae|g__Porticoccaceae_unclassified|s__Porticoccaceae_bacterium|t__SGB580
SGB	581	0	1	kSGB	Species	k__Bacteria|p__Proteobacteria|c__Gammaproteobacteria|o__Cellvibrionales|f__Porticoccaceae|g__Porticoccaceae_unclassified|s__Porticoccaceae_bacterium|t__SGB581
SGB	582	0	1	kSGB	Species	k__Archaea|p__Candidatus_Diapherotrites|c__Candidatus_Diapherotrites_unclassified|o__Candidatus_Diapherotrites_unclassified|f__Candidatus_Diapherotrites_unclassified|g__Candidatus_Diapherotrites_unclassified|s__Candidatus_Diapherotrites_archaeon|t__SGB582
SGB	583	0	1	kSGB	Species	k__Archaea|p__Candidatus_Diapherotrites|c__Candidatus_Diapherotrites_unclassified|o__Candidatus_Diapherotrites_unclassified|f__Candidatus_Diapherotrites_unclassified|g__Candidatus_Diapherotrites_unclassified|s__Candidatus_Diapherotrites_archaeon_CG11_big_fil_rev_8_21_14_0_20_37_9|t__SGB583
SGB	584	0	1	kSGB	Species	k__Archaea|p__Archaea_unclassified|c__Archaea_unclassified|o__Archaea_unclassified|f__Archaea_unclassified|g__Archaea_unclassified|s__archaeon_GW2011_AR10|t__SGB584
SGB	585	0	1	kSGB	Species	k__Archaea|p__Candidatus_Diapherotrites|c__Candidatus_Diapherotrites_unclassified|o__Candidatus_Diapherotrites_unclassified|f__Candidatus_Diapherotrites_unclassified|g__Candidatus_Diapherotrites_unclassified|s__Candidatus_Diapherotrites_archaeon|t__SGB585
SGB	586	0	1	kSGB	Species	k__Archaea|p__Candidatus_Heimdallarchaeota|c__Candidatus_Heimdallarchaeota_unclassified|o__Candidatus_Heimdallarchaeota_unclassified|f__Candidatus_Heimdallarchaeota_unclassified|g__Candidatus_Heimdallarchaeota_unclassified|s__Candidatus_Heimdallarchaeota_archaeon_LC_2|t__SGB586
SGB	587	0	1	kSGB	Species	k__Archaea|p__Candidatus_Heimdallarchaeota|c__Candidatus_Heimdallarchaeota_unclassified|o__Candidatus_Heimdallarchaeota_unclassified|f__Candidatus_Heimdallarchaeota_unclassified|g__Candidatus_Heimdallarchaeota_unclassified|s__Candidatus_Heimdallarchaeota_archaeon|t__SGB587
SGB	588	0	1	kSGB	Species	k__Bacteria|p__Chlamydiae|c__Chlamydiia|o__Chlamydiales|f__Chlamydiales_unclassified|g__Chlamydiales_unclassified|s__Chlamydiales_bacterium_SCGC_AG_110_M15|t__SGB588
SGB	589	0	1	kSGB	Species	k__Archaea|p__Euryarchaeota|c__Methanomicrobia|o__Methanosarcinales|f__Candidatus_Methanoperedenaceae|g__Candidatus_Methanoperedens|s__Candidatus_Methanoperedens_nitroreducens|t__SGB589
SGB	590	0	1	kSGB	Species	k__Archaea|p__Euryarchaeota|c__Methanomicrobia|o__Methanosarcinales|f__Candidatus_Methanoperedenaceae|g__Candidatus_Methanoperedens|s__Candidatus_Methanoperedens_sp_BLZ1|t__SGB590
SGB	591	0	1	kSGB	Species	k__Archaea|p__Euryarchaeota|c__Methanomicrobia|o__Methanosarcinales|f__Candidatus_Methanoperedenaceae|g__Candidatus_Methanoperedens|s__Candidatus_Methanoperedens_nitroreducens|t__SGB591
SGB	592	0	3	kSGB	Species	k__Archaea|p__Euryarchaeota|c__Methanomicrobia|o__Methanosarcinales|f__Methanosarcinaceae|g__Methanosarcina|s__Methanosarcina_siciliae|t__SGB592
SGB	593	0	1	kSGB	Species	k__Archaea|p__Euryarchaeota|c__Methanomicrobia|o__Methanosarcinales|f__Methanosarcinaceae|g__Methanosarcina|s__Methanosarcina_acetivorans|t__SGB593
SGB	594	0	7	kSGB	Species	k__Archaea|p__Euryarchaeota|c__Methanomicrobia|o__Methanosarcinales|f__Methanosarcinaceae|g__Methanosarcina|s__Methanosarcina_sp_1_H_T_1A_1|t__SGB594
SGB	595	0	2	kSGB	Species	k__Archaea|p__Euryarchaeota|c__Methanomicrobia|o__Methanosarcinales|f__Methanosarcinaceae|g__Methanosarcina|s__Methanosarcina_sp_WWM596|t__SGB595
SGB	596	0	1	kSGB	Species	k__Archaea|p__Euryarchaeota|c__Methanomicrobia|o__Methanosarcinales|f__Methanosarcinaceae|g__Methanosarcina|s__Methanosarcina_lacustris|t__SGB596
SGB	597	0	63	kSGB	Species	k__Archaea|p__Euryarchaeota|c__Methanomicrobia|o__Methanosarcinales|f__Methanosarcinaceae|g__Methanosarcina|s__Methanosarcina_mazei|t__SGB597
SGB	598	0	1	kSGB	Species	k__Archaea|p__Euryarchaeota|c__Methanomicrobia|o__Methanosarcinales|f__Methanosarcinaceae|g__Methanosarcina|s__Methanosarcina_horonobensis|t__SGB598
SGB	600	0	2	kSGB	Species	k__Archaea|p__Euryarchaeota|c__Methanomicrobia|o__Methanosarcinales|f__Methanosarcinaceae|g__Methanosarcina|s__Methanosarcina_barkeri|t__SGB600
SGB	601	0	2	kSGB	Species	k__Archaea|p__Euryarchaeota|c__Methanomicrobia|o__Methanosarcinales|f__Methanosarcinaceae|g__Methanosarcina|s__Methanosarcina_vacuolata|t__SGB601
SGB	602	0	2	kSGB	Species	k__Archaea|p__Euryarchaeota|c__Methanomicrobia|o__Methanosarcinales|f__Methanosarcinaceae|g__Methanosarcina|s__Methanosarcina_barkeri|t__SGB602
SGB	603	0	4	kSGB	Species	k__Archaea|p__Euryarchaeota|c__Methanomicrobia|o__Methanosarcinales|f__Methanosarcinaceae|g__Methanosarcina|s__Methanosarcina_barkeri|t__SGB603
SGB	605	0	2	kSGB	Species	k__Archaea|p__Euryarchaeota|c__Methanomicrobia|o__Methanosarcinales|f__Methanosarcinaceae|g__Methanosarcina|s__Methanosarcina_thermophila|t__SGB605
SGB	606	0	1	kSGB	Species	k__Archaea|p__Euryarchaeota|c__Methanomicrobia|o__Methanosarcinales|f__Methanosarcinaceae|g__Methanosarcina|s__Methanosarcina_flavescens|t__SGB606
SGB	609	0	1	kSGB	Species	k__Archaea|p__Euryarchaeota|c__Methanomicrobia|o__Methanosarcinales|f__Methanosarcinaceae|g__Methanosarcina|s__Methanosarcina_sp_Ant1|t__SGB609
SGB	610	0	1	kSGB	Species	k__Archaea|p__Euryarchaeota|c__Methanomicrobia|o__Methanosarcinales|f__Methanosarcinaceae|g__Methanosarcina|s__Methanosarcina_sp_MTP4|t__SGB610
SGB	611	0	1	kSGB	Species	k__Archaea|p__Euryarchaeota|c__Methanomicrobia|o__Methanosarcinales|f__Methanosarcinaceae|g__Methanomethylovorans|s__Methanomethylovorans_hollandica|t__SGB611
SGB	613	0	1	kSGB	Species	k__Archaea|p__Euryarchaeota|c__Methanomicrobia|o__Methanosarcinales|f__Methanosarcinaceae|g__Methanococcoides|s__Methanococcoides_burtonii|t__SGB613
SGB	614	0	1	kSGB	Species	k__Archaea|p__Euryarchaeota|c__Methanomicrobia|o__Methanosarcinales|f__Methanosarcinaceae|g__Methanococcoides|s__Methanococcoides_methylutens|t__SGB614
SGB	615	0	1	kSGB	Species	k__Archaea|p__Euryarchaeota|c__Methanomicrobia|o__Methanosarcinales|f__Methanosarcinaceae|g__Methanolobus|s__Methanolobus_psychrophilus|t__SGB615
SGB	617	0	1	kSGB	Species	k__Archaea|p__Euryarchaeota|c__Methanomicrobia|o__Methanosarcinales|f__Methanosarcinaceae|g__Methanolobus|s__Methanolobus_sp_T82_4|t__SGB617
SGB	619	0	1	kSGB	Species	k__Archaea|p__Euryarchaeota|c__Methanomicrobia|o__Methanosarcinales|f__Methanosarcinaceae|g__Methanolobus|s__Methanolobus_tindarius|t__SGB619
SGB	620	0	1	kSGB	Species	k__Archaea|p__Euryarchaeota|c__Methanomicrobia|o__Methanosarcinales|f__Methanosarcinaceae|g__Methanolobus|s__Methanolobus_vulcani|t__SGB620
SGB	621	0	1	kSGB	Species	k__Archaea|p__Euryarchaeota|c__Methanomicrobia|o__Methanosarcinales|f__Methanosarcinaceae|g__Methanolobus|s__Methanolobus_profundi|t__SGB621
SGB	623	0	2	kSGB	Species	k__Archaea|p__Euryarchaeota|c__Methanomicrobia|o__Methanosarcinales|f__Methanosarcinaceae|g__Methanohalophilus|s__Methanohalophilus_halophilus|t__SGB623
SGB	624	0	3	kSGB	Species	k__Archaea|p__Euryarchaeota|c__Methanomicrobia|o__Methanosarcinales|f__Methanosarcinaceae|g__Methanohalophilus|s__Methanohalophilus_portucalensis|t__SGB624
SGB	625	0	4	kSGB	Species	k__Archaea|p__Euryarchaeota|c__Methanomicrobia|o__Methanosarcinales|f__Methanosarcinaceae|g__Methanohalophilus|s__Methanohalophilus_sp_T328_1|t__SGB625
SGB	626	0	1	kSGB	Species	k__Archaea|p__Euryarchaeota|c__Methanomicrobia|o__Methanosarcinales|f__Methanosarcinaceae|g__Methanohalophilus|s__Methanohalophilus_mahii|t__SGB626
SGB	627	0	1	kSGB	Species	k__Archaea|p__Euryarchaeota|c__Methanomicrobia|o__Methanosarcinales|f__Methanosarcinaceae|g__Methanosalsum|s__Methanosalsum_zhilinae|t__SGB627
SGB	628	0	1	kSGB	Species	k__Archaea|p__Euryarchaeota|c__Methanomicrobia|o__Methanosarcinales|f__Methanosarcinaceae|g__Methanohalobium|s__Methanohalobium_evestigatum|t__SGB628
SGB	629	0	6	kSGB	Species	k__Archaea|p__Euryarchaeota|c__Euryarchaeota_unclassified|o__Candidatus_Altiarchaeales|f__Candidatus_Altiarchaeum_unclassified|g__Candidatus_Altiarchaeum|s__Candidatus_Altiarchaeum_sp_CG2_30_32_3053|t__SGB629
SGB	630	0	2	kSGB	Species	k__Archaea|p__Euryarchaeota|c__Euryarchaeota_unclassified|o__Candidatus_Altiarchaeales|f__Candidatus_Altiarchaeales_archaeon_HGW_Altiarchaeales_2_unclassified|g__Candidatus_Altiarchaeales_archaeon_HGW_Altiarchaeales_2_unclassified|s__Candidatus_Altiarchaeales_archaeon_HGW_Altiarchaeales_2|t__SGB630
SGB	631	0	1	kSGB	Species	k__Archaea|p__Euryarchaeota|c__Euryarchaeota_unclassified|o__Candidatus_Altiarchaeales|f__Candidatus_Altiarchaeales_archaeon_A3_unclassified|g__Candidatus_Altiarchaeales_archaeon_A3_unclassified|s__Candidatus_Altiarchaeales_archaeon_A3|t__SGB631
SGB	632	0	1	kSGB	Species	k__Archaea|p__Euryarchaeota|c__Euryarchaeota_unclassified|o__Candidatus_Altiarchaeales|f__Candidatus_Altiarchaeales_archaeon_HGW_Altiarchaeales_3_unclassified|g__Candidatus_Altiarchaeales_archaeon_HGW_Altiarchaeales_3_unclassified|s__Candidatus_Altiarchaeales_archaeon_HGW_Altiarchaeales_3|t__SGB632
SGB	633	0	1	kSGB	Species	k__Archaea|p__Euryarchaeota|c__Euryarchaeota_unclassified|o__Candidatus_Altiarchaeales|f__Candidatus_Altiarchaeales_archaeon_ex4484_96_unclassified|g__Candidatus_Altiarchaeales_archaeon_ex4484_96_unclassified|s__Candidatus_Altiarchaeales_archaeon_ex4484_96|t__SGB633
SGB	634	0	1	kSGB	Species	k__Archaea|p__Euryarchaeota|c__Euryarchaeota_unclassified|o__Candidatus_Altiarchaeales|f__Candidatus_Altiarchaeales_archaeon_ex4484_2_unclassified|g__Candidatus_Altiarchaeales_archaeon_ex4484_2_unclassified|s__Candidatus_Altiarchaeales_archaeon_ex4484_2|t__SGB634
SGB	635	0	2	kSGB	Species	k__Archaea|p__Euryarchaeota|c__Euryarchaeota_unclassified|o__Candidatus_Altiarchaeales|f__Candidatus_Altiarchaeales_archaeon_WOR_SM1_79_unclassified|g__Candidatus_Altiarchaeales_archaeon_WOR_SM1_79_unclassified|s__Candidatus_Altiarchaeales_archaeon_WOR_SM1_79|t__SGB635
SGB	636	0	1	kSGB	Species	k__Archaea|p__Euryarchaeota|c__Euryarchaeota_unclassified|o__Candidatus_Altiarchaeales|f__Candidatus_Altiarchaeales_archaeon_WOR_SM1_SCG_unclassified|g__Candidatus_Altiarchaeales_archaeon_WOR_SM1_SCG_unclassified|s__Candidatus_Altiarchaeales_archaeon_WOR_SM1_SCG|t__SGB636
SGB	637	0	1	kSGB	Species	k__Archaea|p__Euryarchaeota|c__Euryarchaeota_unclassified|o__Candidatus_Altiarchaeales|f__Candidatus_Altiarchaeales_archaeon_IMC4_unclassified|g__Candidatus_Altiarchaeales_archaeon_IMC4_unclassified|s__Candidatus_Altiarchaeales_archaeon_IMC4|t__SGB637
SGB	638	0	1	kSGB	Species	k__Archaea|p__Candidatus_Aenigmarchaeota|c__Candidatus_Aenigmarchaeota_unclassified|o__Candidatus_Aenigmarchaeota_unclassified|f__Candidatus_Aenigmarchaeota_unclassified|g__Candidatus_Aenigmarchaeota_unclassified|s__Candidatus_Aenigmarchaeota_archaeon_ex4484_224|t__SGB638
SGB	639	0	1	kSGB	Species	k__Archaea|p__Crenarchaeota|c__Thermoprotei|o__Thermoproteales|f__Thermofilaceae|g__Thermofilum|s__Thermofilum_sp_ex4484_82|t__SGB639
SGB	640	0	1	kSGB	Species	k__Archaea|p__Nanoarchaeota|c__Nanoarchaeota_unclassified|o__Nanoarchaeales|f__Nanopusillaceae|g__Candidatus_Nanobsidianus|s__Candidatus_Nanobsidianus_stetteri|t__SGB640
SGB	641	0	1	kSGB	Species	k__Archaea|p__Nanoarchaeota|c__Nanoarchaeota_unclassified|o__Nanoarchaeales|f__Nanopusillaceae|g__Candidatus_Nanopusillus|s__Candidatus_Nanopusillus_acidilobi|t__SGB641
SGB	642	0	1	kSGB	Species	k__Archaea|p__Crenarchaeota|c__Thermoprotei|o__Acidilobales|f__Caldisphaeraceae|g__Caldisphaera|s__Caldisphaera_lagunensis|t__SGB642
SGB	644	0	1	kSGB	Species	k__Archaea|p__Euryarchaeota|c__Methanopyri|o__Methanopyrales|f__Methanopyraceae|g__Methanopyrus|s__Methanopyrus_kandleri|t__SGB644
SGB	645	0	1	kSGB	Species	k__Archaea|p__Nanoarchaeota|c__Nanoarchaeota_unclassified|o__Nanoarchaeales|f__Nanoarchaeaceae|g__Nanoarchaeum|s__Nanoarchaeum_equitans|t__SGB645
SGB	646	0	1	kSGB	Species	k__Archaea|p__Euryarchaeota|c__Methanococci|o__Methanococcales|f__Methanocaldococcaceae|g__Methanocaldococcus|s__Methanocaldococcus_sp_FS406_22|t__SGB646
SGB	647	0	1	kSGB	Species	k__Archaea|p__Euryarchaeota|c__Methanococci|o__Methanococcales|f__Methanocaldococcaceae|g__Methanocaldococcus|s__Methanocaldococcus_bathoardescens|t__SGB647
SGB	648	0	1	kSGB	Species	k__Archaea|p__Euryarchaeota|c__Methanococci|o__Methanococcales|f__Methanocaldococcaceae|g__Methanocaldococcus|s__Methanocaldococcus_jannaschii|t__SGB648
SGB	649	0	1	kSGB	Species	k__Archaea|p__Euryarchaeota|c__Methanococci|o__Methanococcales|f__Methanocaldococcaceae|g__Methanocaldococcus|s__Methanocaldococcus_fervens|t__SGB649
SGB	650	0	1	kSGB	Species	k__Archaea|p__Euryarchaeota|c__Methanococci|o__Methanococcales|f__Methanocaldococcaceae|g__Methanocaldococcus|s__Methanocaldococcus_vulcanius|t__SGB650
SGB	651	0	1	kSGB	Species	k__Archaea|p__Euryarchaeota|c__Methanococci|o__Methanococcales|f__Methanocaldococcaceae|g__Methanotorris|s__Methanotorris_igneus|t__SGB651
SGB	652	0	1	kSGB	Species	k__Archaea|p__Euryarchaeota|c__Methanococci|o__Methanococcales|f__Methanocaldococcaceae|g__Methanotorris|s__Methanotorris_formicicus|t__SGB652
SGB	653	0	1	kSGB	Species	k__Archaea|p__Euryarchaeota|c__Methanococci|o__Methanococcales|f__Methanocaldococcaceae|g__Methanocaldococcus|s__Methanocaldococcus_villosus|t__SGB653
SGB	654	0	1	kSGB	Species	k__Archaea|p__Euryarchaeota|c__Methanococci|o__Methanococcales|f__Methanocaldococcaceae|g__Methanocaldococcus|s__Methanocaldococcus_infernus|t__SGB654
SGB	655	0	1	kSGB	Species	k__Archaea|p__Euryarchaeota|c__Methanococci|o__Methanococcales|f__Methanococcaceae|g__Methanococcus|s__Methanococcus_aeolicus|t__SGB655
SGB	656	0	1	kSGB	Species	k__Archaea|p__Euryarchaeota|c__Methanococci|o__Methanococcales|f__Methanococcaceae|g__Methanothermococcus|s__Methanothermococcus_okinawensis|t__SGB656
SGB	658	0	2	kSGB	Species	k__Archaea|p__Euryarchaeota|c__Methanococci|o__Methanococcales|f__Methanococcaceae|g__Methanococcus|s__Methanococcus_maripaludis|t__SGB658
SGB	659	0	1	kSGB	Species	k__Archaea|p__Euryarchaeota|c__Methanococci|o__Methanococcales|f__Methanococcaceae|g__Methanococcus|s__Methanococcus_maripaludis|t__SGB659
SGB	660	0	1	kSGB	Species	k__Archaea|p__Euryarchaeota|c__Methanococci|o__Methanococcales|f__Methanococcaceae|g__Methanococcus|s__Methanococcus_maripaludis|t__SGB660
SGB	661	0	1	kSGB	Species	k__Archaea|p__Euryarchaeota|c__Methanococci|o__Methanococcales|f__Methanococcaceae|g__Methanococcus|s__Methanococcus_maripaludis|t__SGB661
SGB	662	0	1	kSGB	Species	k__Archaea|p__Euryarchaeota|c__Methanococci|o__Methanococcales|f__Methanococcaceae|g__Methanococcus|s__Methanococcus_vannielii|t__SGB662
SGB	663	0	1	kSGB	Species	k__Archaea|p__Euryarchaeota|c__Methanococci|o__Methanococcales|f__Methanococcaceae|g__Methanococcus|s__Methanococcus_voltae|t__SGB663
SGB	664	0	1	kSGB	Species	k__Archaea|p__Candidatus_Odinarchaeota|c__Candidatus_Odinarchaeota_unclassified|o__Candidatus_Odinarchaeota_unclassified|f__Candidatus_Odinarchaeota_unclassified|g__Candidatus_Odinarchaeota_unclassified|s__Candidatus_Odinarchaeota_archaeon_LCB_4|t__SGB664
SGB	665	0	1	kSGB	Species	k__Bacteria|p__Proteobacteria|c__Alphaproteobacteria|o__Rickettsiales|f__Rickettsiales_unclassified|g__Rickettsiales_unclassified|s__Rickettsiales_bacterium|t__SGB665
SGB	674	0	3	kSGB	Species	k__Archaea|p__Euryarchaeota|c__Methanobacteria|o__Methanobacteriales|f__Methanobacteriaceae|g__Methanothermobacter|s__Methanothermobacter_thermautotrophicus|t__SGB674
SGB	675	0	1	kSGB	Species	k__Archaea|p__Euryarchaeota|c__Methanobacteria|o__Methanobacteriales|f__Methanobacteriaceae|g__Methanothermobacter|s__Methanothermobacter_marburgensis|t__SGB675
SGB	676	0	1	kSGB	Species	k__Archaea|p__Euryarchaeota|c__Methanobacteria|o__Methanobacteriales|f__Methanobacteriaceae|g__Methanothermobacter|s__Methanothermobacter_wolfeii|t__SGB676
SGB	677	0	1	kSGB	Species	k__Archaea|p__Euryarchaeota|c__Methanobacteria|o__Methanobacteriales|f__Methanobacteriaceae|g__Methanobacterium|s__Methanobacterium_congolense|t__SGB677
SGB	679	0	1	kSGB	Species	k__Archaea|p__Euryarchaeota|c__Methanobacteria|o__Methanobacteriales|f__Methanobacteriaceae|g__Methanobacterium|s__Methanobacterium_paludis|t__SGB679
SGB	680	0	1	kSGB	Species	k__Archaea|p__Euryarchaeota|c__Methanobacteria|o__Methanobacteriales|f__Methanobacteriaceae|g__Methanobacterium|s__Methanobacterium_lacus|t__SGB680
SGB	681	0	2	kSGB	Species	k__Archaea|p__Euryarchaeota|c__Methanobacteria|o__Methanobacteriales|f__Methanobacteriaceae|g__Methanobacterium|s__Methanobacterium_sp_A39|t__SGB681
SGB	690	1	1	kSGB	Species	k__Archaea|p__Euryarchaeota|c__Methanobacteria|o__Methanobacteriales|f__Methanobacteriaceae|g__Methanobacterium|s__Methanobacterium_sp_MB1|t__SGB690
SGB	691	0	4	kSGB	Species	k__Archaea|p__Euryarchaeota|c__Methanobacteria|o__Methanobacteriales|f__Methanobacteriaceae|g__Methanobacterium|s__Methanobacterium_formicicum|t__SGB691
SGB	692	0	2	kSGB	Species	k__Archaea|p__Euryarchaeota|c__Methanobacteria|o__Methanobacteriales|f__Methanobacteriaceae|g__Methanobacterium|s__Methanobacterium_sp_MZ_A1|t__SGB692
SGB	693	0	1	kSGB	Species	k__Archaea|p__Euryarchaeota|c__Methanobacteria|o__Methanobacteriales|f__Methanobacteriaceae|g__Methanobacterium|s__Methanobacterium_formicicum|t__SGB693
SGB	694	0	1	kSGB	Species	k__Archaea|p__Euryarchaeota|c__Methanobacteria|o__Methanobacteriales|f__Methanobacteriaceae|g__Methanobacterium|s__Methanobacterium_sp_Maddingley_MBC34|t__SGB694
SGB	696	2	1	kSGB	Species	k__Archaea|p__Euryarchaeota|c__Methanobacteria|o__Methanobacteriales|f__Methanobacteriaceae|g__Methanosphaera|s__Methanosphaera_cuniculi|t__SGB696
SGB	697	1	0	uSGB	Family	k__Archaea|p__Euryarchaeota|c__Methanobacteria|o__Methanobacteriales|f__Methanobacteriaceae|g__GGB519|s__GGB519_SGB697|t__SGB697
SGB	698	9	2	kSGB	Species	k__Archaea|p__Euryarchaeota|c__Methanobacteria|o__Methanobacteriales|f__Methanobacteriaceae|g__Methanosphaera|s__Methanosphaera_stadtmanae|t__SGB698
SGB	699	0	1	kSGB	Species	k__Archaea|p__Euryarchaeota|c__Methanobacteria|o__Methanobacteriales|f__Methanobacteriaceae|g__Methanosphaera|s__Methanosphaera_sp_WGK6|t__SGB699
SGB	700	0	1	kSGB	Species	k__Archaea|p__Euryarchaeota|c__Methanobacteria|o__Methanobacteriales|f__Methanobacteriaceae|g__Methanobrevibacter|s__Methanobrevibacter_cuticularis|t__SGB700
SGB	701	0	1	kSGB	Species	k__Archaea|p__Euryarchaeota|c__Methanobacteria|o__Methanobacteriales|f__Methanobacteriaceae|g__Methanobrevibacter|s__Methanobrevibacter_arboriphilus|t__SGB701
SGB	702	0	1	kSGB	Species	k__Archaea|p__Euryarchaeota|c__Methanobacteria|o__Methanobacteriales|f__Methanobacteriaceae|g__Methanobrevibacter|s__Methanobrevibacter_filiformis|t__SGB702
SGB	703	0	1	kSGB	Species	k__Archaea|p__Euryarchaeota|c__Methanobacteria|o__Methanobacteriales|f__Methanobacteriaceae|g__Methanobrevibacter|s__Methanobrevibacter_curvatus|t__SGB703
SGB	706	0	2	kSGB	Species	k__Archaea|p__Euryarchaeota|c__Methanobacteria|o__Methanobacteriales|f__Methanobacteriaceae|g__Methanobrevibacter|s__Methanobrevibacter_olleyae|t__SGB706
SGB	707	0	1	kSGB	Species	k__Archaea|p__Euryarchaeota|c__Methanobacteria|o__Methanobacteriales|f__Methanobacteriaceae|g__Methanobrevibacter|s__Methanobrevibacter_ruminantium|t__SGB707
SGB	709	0	1	kSGB	Species	k__Archaea|p__Euryarchaeota|c__Methanobacteria|o__Methanobacteriales|f__Methanobacteriaceae|g__Methanobrevibacter|s__Methanobrevibacter_sp_AbM4|t__SGB709
SGB	710	0	1	kSGB	Species	k__Archaea|p__Euryarchaeota|c__Methanobacteria|o__Methanobacteriales|f__Methanobacteriaceae|g__Methanobrevibacter|s__Methanobrevibacter_sp_87_7|t__SGB710
SGB	711	3	0	uSGB	Family	k__Archaea|p__Euryarchaeota|c__Methanobacteria|o__Methanobacteriales|f__Methanobacteriaceae|g__GGB532|s__GGB532_SGB711|t__SGB711
SGB	713	94	0	uSGB	Genus	k__Archaea|p__Euryarchaeota|c__Methanobacteria|o__Methanobacteriales|f__Methanobacteriaceae|g__Methanobrevibacter|s__Methanobrevibacter_SGB713|t__SGB713
SGB	714	488	6	kSGB	Species	k__Archaea|p__Euryarchaeota|c__Methanobacteria|o__Methanobacteriales|f__Methanobacteriaceae|g__Methanobrevibacter|s__Methanobrevibacter_smithii|t__SGB714
SGB	715	1	0	uSGB	Family	k__Archaea|p__Euryarchaeota|c__Methanobacteria|o__Methanobacteriales|f__Methanobacteriaceae|g__GGB535|s__GGB535_SGB715|t__SGB715
SGB	716	0	2	kSGB	Species	k__Archaea|p__Euryarchaeota|c__Methanobacteria|o__Methanobacteriales|f__Methanobacteriaceae|g__Methanobrevibacter|s__Methanobrevibacter_sp_A27|t__SGB716
SGB	717	0	1	kSGB	Species	k__Archaea|p__Euryarchaeota|c__Methanobacteria|o__Methanobacteriales|f__Methanobacteriaceae|g__Methanobrevibacter|s__Methanobrevibacter_sp_YE315|t__SGB717
SGB	719	0	1	kSGB	Species	k__Archaea|p__Euryarchaeota|c__Methanobacteria|o__Methanobacteriales|f__Methanobacteriaceae|g__Methanobrevibacter|s__Methanobrevibacter_millerae|t__SGB719
SGB	720	0	1	kSGB	Species	k__Archaea|p__Euryarchaeota|c__Methanobacteria|o__Methanobacteriales|f__Methanobacteriaceae|g__Methanobrevibacter|s__Methanobrevibacter_oralis|t__SGB720
SGB	722	0	1	kSGB	Species	k__Archaea|p__Euryarchaeota|c__Methanobacteria|o__Methanobacteriales|f__Methanothermaceae|g__Methanothermus|s__Methanothermus_fervidus|t__SGB722
SGB	725	0	1	kSGB	Species	k__Bacteria|p__Proteobacteria|c__Alphaproteobacteria|o__Rhodobacterales|f__Hyphomonadaceae|g__Robiginitomaculum|s__Robiginitomaculum_sp|t__SGB725
SGB	727	0	1	kSGB	Species	k__Bacteria|p__Bacteroidetes|c__Cytophagia|o__Cytophagales|f__Cytophagaceae|g__Cytophagaceae_unclassified|s__Cytophagaceae_bacterium_BCCC1|t__SGB727
SGB	728	0	1	kSGB	Species	k__Bacteria|p__Bacteroidetes|c__Bacteroidetes_unclassified|o__Bacteroidetes_unclassified|f__Bacteroidetes_unclassified|g__Bacteroidetes_unclassified|s__Bacteroidetes_bacterium_B1_2017|t__SGB728
SGB	729	0	1	kSGB	Species	k__Bacteria|p__Bacteroidetes|c__Flavobacteriia|o__Flavobacteriales|f__Flavobacteriaceae|g__Flavobacterium|s__Flavobacterium_sp_BFFFF2|t__SGB729
SGB	730	0	1	kSGB	Species	k__Archaea|p__Candidatus_Nanohaloarchaeota|c__Nanohaloarchaea|o__Nanohaloarchaea_unclassified|f__Nanohaloarchaea_unclassified|g__Candidatus_Nanosalina|s__Candidatus_Nanosalina_sp_J07AB43|t__SGB730
SGB	731	0	1	kSGB	Species	k__Archaea|p__Candidatus_Nanohaloarchaeota|c__Nanohaloarchaea|o__Nanohaloarchaea_unclassified|f__Nanohaloarchaea_unclassified|g__Nanohaloarchaea_unclassified|s__Candidatus_Haloredivivus_sp_G17|t__SGB731
SGB	732	0	117	kSGB	Species	k__Eukaryota|p__Ascomycota|c__Saccharomycetes|o__Saccharomycetales|f__Saccharomycetaceae|g__Saccharomyces|s__Saccharomyces_cerevisiae|t__SGB732
SGB	733	0	1	kSGB	Species	k__Eukaryota|p__Ascomycota|c__Saccharomycetes|o__Saccharomycetales|f__Saccharomycetaceae|g__Saccharomyces|s__Saccharomyces_kudriavzevii|t__SGB733
SGB	734	0	1	kSGB	Species	k__Eukaryota|p__Ascomycota|c__Saccharomycetes|o__Saccharomycetales|f__Saccharomycetaceae|g__Saccharomyces|s__Saccharomyces_arboricola|t__SGB734
SGB	735	0	1	kSGB	Species	k__Eukaryota|p__Ascomycota|c__Saccharomycetes|o__Saccharomycetales|f__Saccharomycetaceae|g__Saccharomyces|s__Saccharomyces_eubayanus|t__SGB735
SGB	736	0	25	kSGB	Species	k__Eukaryota|p__Ascomycota|c__Saccharomycetes|o__Saccharomycetales|f__Debaryomycetaceae|g__Candida|s__Candida_albicans|t__SGB736
SGB	737	0	1	kSGB	Species	k__Eukaryota|p__Ascomycota|c__Saccharomycetes|o__Saccharomycetales|f__Debaryomycetaceae|g__Candida|s__Candida_dubliniensis|t__SGB737
SGB	738	0	1	kSGB	Species	k__Eukaryota|p__Ascomycota|c__Saccharomycetes|o__Saccharomycetales|f__Debaryomycetaceae|g__Candida|s__Candida_tropicalis|t__SGB738
SGB	739	0	1	kSGB	Species	k__Eukaryota|p__Ascomycota|c__Saccharomycetes|o__Saccharomycetales|f__Debaryomycetaceae|g__Candida|s__Candida_maltosa|t__SGB739
SGB	740	0	1	kSGB	Species	k__Eukaryota|p__Ascomycota|c__Saccharomycetes|o__Saccharomycetales|f__Debaryomycetaceae|g__Candida|s__Candida_orthopsilosis|t__SGB740
SGB	741	0	1	kSGB	Species	k__Eukaryota|p__Eukaryota_unclassified|c__Eukaryota_unclassified|o__Eukaryota_unclassified|f__Eukaryota_unclassified|g__Blastocystis|s__Blastocystis_hominis|t__SGB741
SGB	743	3	1	kSGB	Species	k__Bacteria|p__Firmicutes|c__Clostridia|o__Clostridiales|f__Peptostreptococcaceae|g__Peptostreptococcus|s__Peptostreptococcus_russellii|t__SGB743
SGB	745	1	0	uSGB	Family	k__Bacteria|p__Firmicutes|c__Clostridia|o__Clostridiales|f__Peptostreptococcaceae|g__GGB562|s__GGB562_SGB745|t__SGB745
SGB	746	14	6	kSGB	Species	k__Bacteria|p__Firmicutes|c__Clostridia|o__Clostridiales|f__Peptostreptococcaceae|g__Peptostreptococcus|s__Peptostreptococcus_anaerobius|t__SGB746
SGB	747	2	1	kSGB	Species	k__Bacteria|p__Firmicutes|c__Clostridia|o__Clostridiales|f__Peptostreptococcaceae|g__Peptostreptococcus|s__Peptostreptococcus_sp_MV1|t__SGB747
SGB	748	15	1	kSGB	Species	k__Bacteria|p__Firmicutes|c__Clostridia|o__Clostridiales|f__Peptostreptococcaceae|g__Peptostreptococcus|s__Peptostreptococcus_stomatis|t__SGB748
SGB	749	67	0	uSGB	Genus	k__Bacteria|p__Firmicutes|c__Clostridia|o__Clostridiales|f__Peptostreptococcaceae|g__Peptostreptococcus|s__Peptostreptococcus_SGB749|t__SGB749
SGB	750	0	1	kSGB	Species	k__Bacteria|p__Firmicutes|c__Clostridia|o__Clostridiales|f__Peptostreptococcaceae|g__Peptostreptococcus|s__Peptostreptococcus_sp_D1|t__SGB750
SGB	758	1	0	uSGB	Other	k__Bacteria|p__Firmicutes|c__CFGB235|o__OFGB235|f__FGB235|g__GGB573|s__GGB573_SGB758|t__SGB758
SGB	766	0	1	kSGB	Species	k__Archaea|p__Euryarchaeota|c__Hadesarchaea|o__Hadesarchaea_unclassified|f__Hadesarchaea_unclassified|g__Hadesarchaea_unclassified|s__Hadesarchaea_archaeon_DG_33|t__SGB766
SGB	767	0	1	kSGB	Species	k__Archaea|p__Euryarchaeota|c__Hadesarchaea|o__Hadesarchaea_unclassified|f__Hadesarchaea_unclassified|g__Hadesarchaea_unclassified|s__Hadesarchaea_archaeon_DG_33_1|t__SGB767
SGB	768	0	1	kSGB	Species	k__Archaea|p__Euryarchaeota|c__Hadesarchaea|o__Hadesarchaea_unclassified|f__Hadesarchaea_unclassified|g__Hadesarchaea_unclassified|s__Hadesarchaea_archaeon_CG08_land_8_20_14_0_20_51_8|t__SGB768
SGB	770	0	1	kSGB	Species	k__Archaea|p__Euryarchaeota|c__Euryarchaeota_unclassified|o__Euryarchaeota_unclassified|f__Euryarchaeota_unclassified|g__Euryarchaeota_unclassified|s__Euryarchaeota_archaeon|t__SGB770
SGB	771	0	1	kSGB	Species	k__Archaea|p__Euryarchaeota|c__Euryarchaeota_unclassified|o__Euryarchaeota_unclassified|f__Euryarchaeota_unclassified|g__Euryarchaeota_unclassified|s__Euryarchaeota_archaeon|t__SGB771
SGB	772	0	1	kSGB	Species	k__Archaea|p__Candidatus_Bathyarchaeota|c__Candidatus_Bathyarchaeota_unclassified|o__Candidatus_Bathyarchaeota_unclassified|f__Candidatus_Bathyarchaeota_unclassified|g__Candidatus_Bathyarchaeota_unclassified|s__Candidatus_Bathyarchaeota_archaeon_ex4484_135|t__SGB772
SGB	773	0	1	kSGB	Species	k__Archaea|p__Archaea_unclassified|c__Archaea_unclassified|o__Archaea_unclassified|f__Archaea_unclassified|g__Archaea_unclassified|s__archaeon_RBG_16_50_20|t__SGB773
SGB	775	0	1	kSGB	Species	k__Archaea|p__Euryarchaeota|c__Archaeoglobi|o__Archaeoglobales|f__Archaeoglobaceae|g__Geoglobus|s__Geoglobus_acetivorans|t__SGB775
SGB	776	0	1	kSGB	Species	k__Archaea|p__Euryarchaeota|c__Archaeoglobi|o__Archaeoglobales|f__Archaeoglobaceae|g__Geoglobus|s__Geoglobus_ahangari|t__SGB776
SGB	777	0	1	kSGB	Species	k__Archaea|p__Euryarchaeota|c__Archaeoglobi|o__Archaeoglobales|f__Archaeoglobaceae|g__Archaeoglobus|s__Archaeoglobus_sulfaticallidus|t__SGB777
SGB	780	0	3	kSGB	Species	k__Archaea|p__Euryarchaeota|c__Archaeoglobi|o__Archaeoglobales|f__Archaeoglobaceae|g__Archaeoglobus|s__Archaeoglobus_fulgidus|t__SGB780
SGB	781	0	1	kSGB	Species	k__Archaea|p__Euryarchaeota|c__Archaeoglobi|o__Archaeoglobales|f__Archaeoglobaceae|g__Archaeoglobus|s__Archaeoglobus_veneficus|t__SGB781
SGB	782	0	1	kSGB	Species	k__Archaea|p__Euryarchaeota|c__Archaeoglobi|o__Archaeoglobales|f__Archaeoglobaceae|g__Archaeoglobus|s__Archaeoglobus_profundus|t__SGB782
SGB	783	0	1	kSGB	Species	k__Archaea|p__Euryarchaeota|c__Archaeoglobi|o__Archaeoglobales|f__Archaeoglobaceae|g__Ferroglobus|s__Ferroglobus_placidus|t__SGB783
SGB	784	0	1	kSGB	Species	k__Archaea|p__Euryarchaeota|c__Methanomicrobia|o__Methanosarcinales|f__Methanosarcinales_unclassified|g__Candidatus_Syntrophoarchaeum|s__Candidatus_Syntrophoarchaeum_caldarius|t__SGB784
SGB	785	0	1	kSGB	Species	k__Archaea|p__Euryarchaeota|c__Methanomicrobia|o__Methanosarcinales|f__Methanosarcinales_unclassified|g__Candidatus_Syntrophoarchaeum|s__Candidatus_Syntrophoarchaeum_butanivorans|t__SGB785
SGB	789	0	1	kSGB	Species	k__Archaea|p__Euryarchaeota|c__Methanonatronarchaeia|o__Methanonatronarchaeia_unclassified|f__Methanonatronarchaeia_unclassified|g__Methanonatronarchaeum|s__Methanonatronarchaeum_thermophilum|t__SGB789
SGB	790	0	1	kSGB	Species	k__Archaea|p__Archaea_unclassified|c__Archaea_unclassified|o__Archaea_unclassified|f__Archaea_unclassified|g__Archaea_unclassified|s__archaeon_BMS3Bbin16|t__SGB790
SGB	794	0	1	kSGB	Species	k__Archaea|p__Euryarchaeota|c__Euryarchaeota_unclassified|o__Euryarchaeota_unclassified|f__Euryarchaeota_unclassified|g__Euryarchaeota_unclassified|s__Euryarchaeota_archaeon|t__SGB794
SGB	795	0	1	kSGB	Species	k__Archaea|p__Euryarchaeota|c__Euryarchaeota_unclassified|o__Euryarchaeota_unclassified|f__Euryarchaeota_unclassified|g__Euryarchaeota_unclassified|s__Euryarchaeota_archaeon|t__SGB795
SGB	797	0	1	kSGB	Species	k__Archaea|p__Euryarchaeota|c__Thermoplasmata|o__Thermoplasmatales|f__Thermoplasmatales_unclassified|g__Thermoplasmatales_unclassified|s__Thermoplasmatales_archaeon_SG8_52_1|t__SGB797
SGB	798	0	1	kSGB	Species	k__Archaea|p__Euryarchaeota|c__Thermoplasmata|o__Thermoplasmatales|f__Thermoplasmatales_unclassified|g__Thermoplasmatales_unclassified|s__Thermoplasmatales_archaeon_SG8_52_4|t__SGB798
SGB	799	0	1	kSGB	Species	k__Archaea|p__Euryarchaeota|c__Thermoplasmata|o__Thermoplasmatales|f__Thermoplasmatales_unclassified|g__Thermoplasmatales_unclassified|s__Thermoplasmatales_archaeon_SG8_52_3|t__SGB799
SGB	800	0	1	kSGB	Species	k__Archaea|p__Euryarchaeota|c__Thermoplasmata|o__Thermoplasmata_unclassified|f__Thermoplasmata_unclassified|g__Thermoplasmata_unclassified|s__Thermoplasmata_archaeon_M9B1D|t__SGB800
SGB	801	0	1	kSGB	Species	k__Archaea|p__Euryarchaeota|c__Thermoplasmata|o__Thermoplasmatales|f__Thermoplasmatales_unclassified|g__Thermoplasmatales_unclassified|s__Thermoplasmatales_archaeon_SCGC_AB_540_F20|t__SGB801
SGB	802	0	1	kSGB	Species	k__Archaea|p__Euryarchaeota|c__Thermoplasmata|o__Thermoplasmatales|f__Thermoplasmatales_unclassified|g__Thermoplasmatales_unclassified|s__Thermoplasmatales_archaeon_SCGC_AB_539_N05|t__SGB802
SGB	803	0	1	kSGB	Species	k__Archaea|p__Euryarchaeota|c__Thermoplasmata|o__Thermoplasmatales|f__Thermoplasmatales_unclassified|g__Thermoplasmatales_unclassified|s__Thermoplasmatales_archaeon_SCGC_AB_539_C06|t__SGB803
SGB	804	0	1	kSGB	Species	k__Archaea|p__Thaumarchaeota|c__Thaumarchaeota_unclassified|o__Thaumarchaeota_unclassified|f__Thaumarchaeota_unclassified|g__Thaumarchaeota_unclassified|s__Thaumarchaeota_archaeon_SCGC_AB_539_E09|t__SGB804
SGB	807	0	1	kSGB	Species	k__Archaea|p__Euryarchaeota|c__Thermoplasmata|o__Thermoplasmatales|f__Thermoplasmatales_unclassified|g__Thermoplasmatales_unclassified|s__Thermoplasmatales_archaeon_SM1_50|t__SGB807
SGB	808	0	1	kSGB	Species	k__Archaea|p__Euryarchaeota|c__Thermoplasmata|o__Thermoplasmata_unclassified|f__Thermoplasmata_unclassified|g__Thermoplasmata_unclassified|s__Thermoplasmata_archaeon_M11B2D|t__SGB808
SGB	809	0	1	kSGB	Species	k__Archaea|p__Crenarchaeota|c__Thermoprotei|o__Thermoproteales|f__Thermoproteaceae|g__Thermoproteus|s__Thermoproteus_uzoniensis|t__SGB809
SGB	810	0	1	kSGB	Species	k__Archaea|p__Crenarchaeota|c__Thermoprotei|o__Thermoproteales|f__Thermoproteaceae|g__Thermoproteus|s__Thermoproteus_sp_CP80|t__SGB810
SGB	812	0	1	kSGB	Species	k__Archaea|p__Crenarchaeota|c__Thermoprotei|o__Thermoproteales|f__Thermoproteaceae|g__Pyrobaculum|s__Pyrobaculum_islandicum|t__SGB812
SGB	813	0	1	kSGB	Species	k__Archaea|p__Crenarchaeota|c__Thermoprotei|o__Thermoproteales|f__Thermoproteaceae|g__Pyrobaculum|s__Pyrobaculum_neutrophilum|t__SGB813
SGB	814	0	1	kSGB	Species	k__Archaea|p__Crenarchaeota|c__Thermoprotei|o__Thermoproteales|f__Thermoproteaceae|g__Thermoproteus|s__Thermoproteus_tenax|t__SGB814
SGB	815	0	1	kSGB	Species	k__Archaea|p__Crenarchaeota|c__Thermoprotei|o__Thermoproteales|f__Thermoproteaceae|g__Pyrobaculum|s__Pyrobaculum_ferrireducens|t__SGB815
SGB	816	0	1	kSGB	Species	k__Archaea|p__Crenarchaeota|c__Thermoprotei|o__Thermoproteales|f__Thermoproteaceae|g__Pyrobaculum|s__Pyrobaculum_sp_WP30|t__SGB816
SGB	817	0	2	kSGB	Species	k__Archaea|p__Crenarchaeota|c__Thermoprotei|o__Thermoproteales|f__Thermoproteaceae|g__Pyrobaculum|s__Pyrobaculum_arsenaticum|t__SGB817
SGB	818	0	1	kSGB	Species	k__Archaea|p__Crenarchaeota|c__Thermoprotei|o__Thermoproteales|f__Thermoproteaceae|g__Pyrobaculum|s__Pyrobaculum_aerophilum|t__SGB818
SGB	819	0	1	kSGB	Species	k__Archaea|p__Crenarchaeota|c__Thermoprotei|o__Thermoproteales|f__Thermoproteaceae|g__Pyrobaculum|s__Pyrobaculum_calidifontis|t__SGB819
SGB	820	0	1	kSGB	Species	k__Archaea|p__Crenarchaeota|c__Thermoprotei|o__Thermoproteales|f__Thermoproteaceae|g__Caldivirga|s__Caldivirga_maquilingensis|t__SGB820
SGB	822	0	1	kSGB	Species	k__Archaea|p__Crenarchaeota|c__Thermoprotei|o__Thermoproteales|f__Thermoproteaceae|g__Vulcanisaeta|s__Vulcanisaeta_distributa|t__SGB822
SGB	823	0	1	kSGB	Species	k__Archaea|p__Crenarchaeota|c__Thermoprotei|o__Thermoproteales|f__Thermoproteaceae|g__Vulcanisaeta|s__Vulcanisaeta_moutnovskia|t__SGB823
SGB	826	0	1	kSGB	Species	k__Archaea|p__Crenarchaeota|c__Thermoprotei|o__Thermoproteales|f__Thermoproteaceae|g__Vulcanisaeta|s__Vulcanisaeta_sp_EB80|t__SGB826
SGB	829	0	2	kSGB	Species	k__Archaea|p__Euryarchaeota|c__Euryarchaeota_unclassified|o__Euryarchaeota_unclassified|f__Euryarchaeota_unclassified|g__Aciduliprofundum|s__Aciduliprofundum_boonei|t__SGB829
SGB	830	0	1	kSGB	Species	k__Archaea|p__Euryarchaeota|c__Euryarchaeota_unclassified|o__Euryarchaeota_unclassified|f__Euryarchaeota_unclassified|g__Aciduliprofundum|s__Aciduliprofundum_sp_MAR08_339|t__SGB830
SGB	831	0	1	kSGB	Species	k__Archaea|p__Crenarchaeota|c__Thermoprotei|o__Thermoproteales|f__Thermofilaceae|g__Thermofilum|s__Thermofilum_pendens|t__SGB831
SGB	832	0	1	kSGB	Species	k__Archaea|p__Crenarchaeota|c__Thermoprotei|o__Thermoproteales|f__Thermofilaceae|g__Thermofilum|s__Thermofilum_sp_NZ13|t__SGB832
SGB	833	0	1	kSGB	Species	k__Archaea|p__Crenarchaeota|c__Thermoprotei|o__Thermoproteales|f__Thermofilaceae|g__Thermofilum|s__Thermofilum_adornatus|t__SGB833
SGB	834	0	1	kSGB	Species	k__Archaea|p__Crenarchaeota|c__Thermoprotei|o__Thermoproteales|f__Thermofilaceae|g__Thermofilum|s__Thermofilum_uzonense|t__SGB834
SGB	837	0	2	kSGB	Species	k__Archaea|p__Thaumarchaeota|c__Thaumarchaeota_unclassified|o__Thaumarchaeota_unclassified|f__Thaumarchaeota_unclassified|g__Candidatus_Caldiarchaeum|s__Candidatus_Caldiarchaeum_subterraneum|t__SGB837
SGB	839	0	1	kSGB	Species	k__Archaea|p__Archaea_unclassified|c__Archaea_unclassified|o__Archaea_unclassified|f__Archaea_unclassified|g__Archaea_unclassified|s__archaeon_HR01|t__SGB839
SGB	840	0	1	kSGB	Species	k__Archaea|p__Archaea_unclassified|c__Archaea_unclassified|o__Archaea_unclassified|f__Archaea_unclassified|g__Archaea_unclassified|s__archaeon_HR02|t__SGB840
SGB	841	0	2	kSGB	Species	k__Archaea|p__Crenarchaeota|c__Thermoprotei|o__Fervidicoccales|f__Fervidicoccaceae|g__Fervidicoccus|s__Fervidicoccus_fontis|t__SGB841
SGB	842	0	1	kSGB	Species	k__Archaea|p__Crenarchaeota|c__Thermoprotei|o__Fervidicoccales|f__Fervidicoccaceae|g__Fervidicoccus|s__Fervidicoccus_sp|t__SGB842
SGB	844	0	1	kSGB	Species	k__Archaea|p__Crenarchaeota|c__Thermoprotei|o__Desulfurococcales|f__Desulfurococcales_unclassified|g__Desulfurococcales_unclassified|s__Desulfurococcales_archaeon_ex4484_42|t__SGB844
SGB	845	0	1	kSGB	Species	k__Archaea|p__Crenarchaeota|c__Thermoprotei|o__Desulfurococcales|f__Desulfurococcales_unclassified|g__Desulfurococcales_unclassified|s__Desulfurococcales_archaeon_ex4484_217_2|t__SGB845
SGB	847	0	1	kSGB	Species	k__Archaea|p__Crenarchaeota|c__Thermoprotei|o__Desulfurococcales|f__Desulfurococcales_unclassified|g__Desulfurococcales_unclassified|s__Desulfurococcales_archaeon_ex4484_58|t__SGB847
SGB	850	0	1	kSGB	Species	k__Archaea|p__Thaumarchaeota|c__Nitrososphaeria|o__Nitrososphaerales|f__Nitrososphaeraceae|g__Nitrososphaera|s__Nitrososphaera_viennensis|t__SGB850
SGB	851	0	1	kSGB	Species	k__Archaea|p__Thaumarchaeota|c__Nitrososphaeria|o__Nitrososphaerales|f__Nitrososphaeraceae|g__Nitrososphaera|s__Candidatus_Nitrososphaera_evergladensis|t__SGB851
SGB	853	0	1	kSGB	Species	k__Archaea|p__Thaumarchaeota|c__Nitrososphaeria|o__Nitrososphaerales|f__Nitrososphaeraceae|g__Nitrososphaera|s__Candidatus_Nitrososphaera_gargensis|t__SGB853
SGB	855	0	1	kSGB	Species	k__Archaea|p__Thaumarchaeota|c__Nitrososphaeria|o__Nitrososphaerales|f__Nitrososphaeraceae|g__Candidatus_Nitrosocosmicus|s__Candidatus_Nitrocosmicus_oleophilus|t__SGB855
SGB	856	0	5	kSGB	Species	k__Archaea|p__Crenarchaeota|c__Thermoprotei|o__Sulfolobales|f__Sulfolobaceae|g__Sulfolobus|s__Sulfolobus_acidocaldarius|t__SGB856
SGB	857	0	1	kSGB	Species	k__Archaea|p__Crenarchaeota|c__Thermoprotei|o__Sulfolobales|f__Sulfolobaceae|g__Sulfolobus|s__Sulfolobus_acidocaldarius|t__SGB857
SGB	858	0	1	kSGB	Species	k__Archaea|p__Crenarchaeota|c__Thermoprotei|o__Sulfolobales|f__Sulfolobaceae|g__Acidianus|s__Candidatus_Acidianus_copahuensis|t__SGB858
SGB	859	0	1	kSGB	Species	k__Archaea|p__Crenarchaeota|c__Thermoprotei|o__Sulfolobales|f__Sulfolobaceae|g__Acidianus|s__Acidianus_manzaensis|t__SGB859
SGB	860	0	6	kSGB	Species	k__Archaea|p__Crenarchaeota|c__Thermoprotei|o__Sulfolobales|f__Sulfolobaceae|g__Sulfolobus|s__Sulfolobus_solfataricus|t__SGB860
SGB	861	0	10	kSGB	Species	k__Archaea|p__Crenarchaeota|c__Thermoprotei|o__Sulfolobales|f__Sulfolobaceae|g__Sulfolobus|s__Sulfolobus_islandicus|t__SGB861
SGB	862	0	1	kSGB	Species	k__Archaea|p__Crenarchaeota|c__Thermoprotei|o__Sulfolobales|f__Sulfolobaceae|g__Metallosphaera|s__Metallosphaera_yellowstonensis|t__SGB862
SGB	863	0	1	kSGB	Species	k__Archaea|p__Crenarchaeota|c__Thermoprotei|o__Sulfolobales|f__Sulfolobaceae|g__Acidianus|s__Acidianus_hospitalis|t__SGB863
SGB	864	0	1	kSGB	Species	k__Archaea|p__Crenarchaeota|c__Thermoprotei|o__Sulfolobales|f__Sulfolobaceae|g__Sulfolobus|s__Sulfolobus_sp_A20|t__SGB864
SGB	865	0	1	kSGB	Species	k__Archaea|p__Crenarchaeota|c__Thermoprotei|o__Sulfolobales|f__Sulfolobaceae|g__Sulfolobus|s__Sulfolobus_tokodaii|t__SGB865
SGB	866	0	7	kSGB	Species	k__Archaea|p__Crenarchaeota|c__Thermoprotei|o__Sulfolobales|f__Sulfolobaceae|g__Metallosphaera|s__Metallosphaera_sedula|t__SGB866
SGB	867	0	1	kSGB	Species	k__Archaea|p__Crenarchaeota|c__Thermoprotei|o__Sulfolobales|f__Sulfolobaceae|g__Metallosphaera|s__Metallosphaera_cuprina|t__SGB867
SGB	868	0	1	kSGB	Species	k__Archaea|p__Crenarchaeota|c__Thermoprotei|o__Sulfolobales|f__Sulfolobales_unclassified|g__Sulfolobales_unclassified|s__Sulfolobales_archaeon_AZ1|t__SGB868
SGB	869	0	2	kSGB	Species	k__Archaea|p__Euryarchaeota|c__Thermococci|o__Thermococcales|f__Thermococcaceae|g__Thermococcus|s__Thermococcus_barophilus|t__SGB869
SGB	870	0	1	kSGB	Species	k__Archaea|p__Euryarchaeota|c__Thermococci|o__Thermococcales|f__Thermococcaceae|g__Thermococcus|s__Thermococcus_paralvinellae|t__SGB870
SGB	871	0	1	kSGB	Species	k__Archaea|p__Euryarchaeota|c__Thermococci|o__Thermococcales|f__Thermococcaceae|g__Thermococcus|s__Thermococcus_litoralis|t__SGB871
SGB	872	0	1	kSGB	Species	k__Archaea|p__Euryarchaeota|c__Thermococci|o__Thermococcales|f__Thermococcales_unclassified|g__Thermococcales_unclassified|s__Thermococcales_archaeon_44_46|t__SGB872
SGB	873	0	1	kSGB	Species	k__Archaea|p__Euryarchaeota|c__Thermococci|o__Thermococcales|f__Thermococcaceae|g__Thermococcus|s__Thermococcus_sp_2319x1|t__SGB873
SGB	874	0	2	kSGB	Species	k__Archaea|p__Euryarchaeota|c__Thermococci|o__Thermococcales|f__Thermococcaceae|g__Thermococcus|s__Thermococcus_sibiricus|t__SGB874
SGB	875	0	1	kSGB	Species	k__Archaea|p__Euryarchaeota|c__Thermococci|o__Thermococcales|f__Thermococcaceae|g__Thermococcus|s__Thermococcus_sp_EP1|t__SGB875
SGB	876	0	1	kSGB	Species	k__Archaea|p__Euryarchaeota|c__Thermococci|o__Thermococcales|f__Thermococcaceae|g__Palaeococcus|s__Palaeococcus_pacificus|t__SGB876
SGB	877	0	1	kSGB	Species	k__Archaea|p__Euryarchaeota|c__Thermococci|o__Thermococcales|f__Thermococcaceae|g__Thermococcus|s__Thermococcus_kodakarensis|t__SGB877
SGB	878	0	1	kSGB	Species	k__Archaea|p__Euryarchaeota|c__Thermococci|o__Thermococcales|f__Thermococcaceae|g__Thermococcus|s__Thermococcus_peptonophilus|t__SGB878
SGB	879	0	1	kSGB	Species	k__Archaea|p__Euryarchaeota|c__Thermococci|o__Thermococcales|f__Thermococcaceae|g__Thermococcus|s__Thermococcus_eurythermalis|t__SGB879
SGB	880	0	1	kSGB	Species	k__Archaea|p__Euryarchaeota|c__Thermococci|o__Thermococcales|f__Thermococcaceae|g__Thermococcus|s__Thermococcus_guaymasensis|t__SGB880
SGB	881	0	1	kSGB	Species	k__Archaea|p__Euryarchaeota|c__Thermococci|o__Thermococcales|f__Thermococcaceae|g__Thermococcus|s__Thermococcus_sp_AM4|t__SGB881
SGB	882	0	1	kSGB	Species	k__Archaea|p__Euryarchaeota|c__Thermococci|o__Thermococcales|f__Thermococcaceae|g__Thermococcus|s__Thermococcus_nautili|t__SGB882
SGB	883	0	1	kSGB	Species	k__Archaea|p__Euryarchaeota|c__Thermococci|o__Thermococcales|f__Thermococcaceae|g__Thermococcus|s__Thermococcus_gammatolerans|t__SGB883
SGB	884	0	1	kSGB	Species	k__Archaea|p__Euryarchaeota|c__Thermococci|o__Thermococcales|f__Thermococcaceae|g__Thermococcus|s__Thermococcus_onnurineus|t__SGB884
SGB	885	0	1	kSGB	Species	k__Archaea|p__Euryarchaeota|c__Thermococci|o__Thermococcales|f__Thermococcaceae|g__Thermococcus|s__Thermococcus_piezophilus|t__SGB885
SGB	886	0	2	kSGB	Species	k__Archaea|p__Euryarchaeota|c__Thermococci|o__Thermococcales|f__Thermococcaceae|g__Thermococcus|s__Thermococcus_thioreducens|t__SGB886
SGB	887	0	1	kSGB	Species	k__Archaea|p__Euryarchaeota|c__Thermococci|o__Thermococcales|f__Thermococcaceae|g__Thermococcus|s__Thermococcus_sp_4557|t__SGB887
SGB	888	0	1	kSGB	Species	k__Archaea|p__Euryarchaeota|c__Thermococci|o__Thermococcales|f__Thermococcaceae|g__Thermococcus|s__Thermococcus_celericrescens|t__SGB888
SGB	889	0	1	kSGB	Species	k__Archaea|p__Euryarchaeota|c__Thermococci|o__Thermococcales|f__Thermococcaceae|g__Thermococcus|s__Thermococcus_sp_5_4|t__SGB889
SGB	890	0	1	kSGB	Species	k__Archaea|p__Euryarchaeota|c__Thermococci|o__Thermococcales|f__Thermococcaceae|g__Thermococcus|s__Thermococcus_cleftensis|t__SGB890
SGB	891	0	1	kSGB	Species	k__Archaea|p__Euryarchaeota|c__Thermococci|o__Thermococcales|f__Thermococcaceae|g__Thermococcus|s__Thermococcus_celer|t__SGB891
SGB	892	0	1	kSGB	Species	k__Archaea|p__Euryarchaeota|c__Thermococci|o__Thermococcales|f__Thermococcaceae|g__Thermococcus|s__Thermococcus_pacificus|t__SGB892
SGB	893	0	1	kSGB	Species	k__Archaea|p__Euryarchaeota|c__Thermococci|o__Thermococcales|f__Thermococcaceae|g__Pyrococcus|s__Pyrococcus_yayanosii|t__SGB893
SGB	894	0	2	kSGB	Species	k__Archaea|p__Euryarchaeota|c__Thermococci|o__Thermococcales|f__Thermococcaceae|g__Pyrococcus|s__Pyrococcus_furiosus|t__SGB894
SGB	895	0	1	kSGB	Species	k__Archaea|p__Euryarchaeota|c__Thermococci|o__Thermococcales|f__Thermococcaceae|g__Pyrococcus|s__Pyrococcus_sp_NA2|t__SGB895
SGB	896	0	1	kSGB	Species	k__Archaea|p__Euryarchaeota|c__Thermococci|o__Thermococcales|f__Thermococcaceae|g__Pyrococcus|s__Pyrococcus_horikoshii|t__SGB896
SGB	897	0	1	kSGB	Species	k__Archaea|p__Euryarchaeota|c__Thermococci|o__Thermococcales|f__Thermococcaceae|g__Pyrococcus|s__Pyrococcus_kukulkanii|t__SGB897
SGB	898	0	1	kSGB	Species	k__Archaea|p__Euryarchaeota|c__Thermococci|o__Thermococcales|f__Thermococcaceae|g__Thermococcus|s__Thermococcus_chitonophagus|t__SGB898
SGB	899	0	1	kSGB	Species	k__Archaea|p__Euryarchaeota|c__Thermococci|o__Thermococcales|f__Thermococcaceae|g__Pyrococcus|s__Pyrococcus_sp_ST04|t__SGB899
SGB	900	0	1	kSGB	Species	k__Archaea|p__Euryarchaeota|c__Thermococci|o__Thermococcales|f__Thermococcaceae|g__Pyrococcus|s__Pyrococcus_abyssi|t__SGB900
SGB	901	0	1	kSGB	Species	k__Archaea|p__Euryarchaeota|c__Hadesarchaea|o__Hadesarchaea_unclassified|f__Hadesarchaea_unclassified|g__Hadesarchaea_unclassified|s__Hadesarchaea_archaeon_YNP_45|t__SGB901
SGB	902	0	1	kSGB	Species	k__Archaea|p__Euryarchaeota|c__Hadesarchaea|o__Hadesarchaea_unclassified|f__Hadesarchaea_unclassified|g__Hadesarchaea_unclassified|s__Hadesarchaea_archaeon_YNP_N21|t__SGB902
SGB	903	0	1	kSGB	Species	k__Archaea|p__Candidatus_Korarchaeota|c__Candidatus_Korarchaeota_unclassified|o__Candidatus_Korarchaeota_unclassified|f__Candidatus_Korarchaeota_unclassified|g__Candidatus_Korarchaeum|s__Candidatus_Korarchaeum_cryptofilum|t__SGB903
SGB	904	0	1	kSGB	Species	k__Archaea|p__Crenarchaeota|c__Thermoprotei|o__Acidilobales|f__Acidilobaceae|g__Acidilobus|s__Acidilobus_saccharovorans|t__SGB904
SGB	906	0	1	kSGB	Species	k__Archaea|p__Crenarchaeota|c__Thermoprotei|o__Desulfurococcales|f__Desulfurococcaceae|g__Staphylothermus|s__Staphylothermus_marinus|t__SGB906
SGB	907	0	1	kSGB	Species	k__Archaea|p__Crenarchaeota|c__Thermoprotei|o__Desulfurococcales|f__Desulfurococcaceae|g__Staphylothermus|s__Staphylothermus_hellenicus|t__SGB907
SGB	908	0	2	kSGB	Species	k__Archaea|p__Crenarchaeota|c__Thermoprotei|o__Desulfurococcales|f__Desulfurococcaceae|g__Desulfurococcus|s__Desulfurococcus_amylolyticus|t__SGB908
SGB	909	0	1	kSGB	Species	k__Archaea|p__Crenarchaeota|c__Thermoprotei|o__Desulfurococcales|f__Desulfurococcaceae|g__Desulfurococcus|s__Desulfurococcus_mucosus|t__SGB909
SGB	910	0	1	kSGB	Species	k__Archaea|p__Crenarchaeota|c__Thermoprotei|o__Desulfurococcales|f__Desulfurococcaceae|g__Thermosphaera|s__Thermosphaera_aggregans|t__SGB910
SGB	911	0	1	kSGB	Species	k__Archaea|p__Crenarchaeota|c__Thermoprotei|o__Desulfurococcales|f__Desulfurococcaceae|g__Thermogladius|s__Thermogladius_calderae|t__SGB911
SGB	912	0	1	kSGB	Species	k__Archaea|p__Crenarchaeota|c__Thermoprotei|o__Desulfurococcales|f__Desulfurococcaceae|g__Ignicoccus|s__Ignicoccus_hospitalis|t__SGB912
SGB	913	0	1	kSGB	Species	k__Archaea|p__Crenarchaeota|c__Thermoprotei|o__Desulfurococcales|f__Desulfurococcaceae|g__Ignicoccus|s__Ignicoccus_islandicus|t__SGB913
SGB	914	0	1	kSGB	Species	k__Archaea|p__Crenarchaeota|c__Thermoprotei|o__Desulfurococcales|f__Desulfurococcaceae|g__Aeropyrum|s__Aeropyrum_pernix|t__SGB914
SGB	915	0	1	kSGB	Species	k__Archaea|p__Crenarchaeota|c__Thermoprotei|o__Desulfurococcales|f__Desulfurococcaceae|g__Aeropyrum|s__Aeropyrum_camini|t__SGB915
SGB	916	0	2	kSGB	Species	k__Archaea|p__Crenarchaeota|c__Thermoprotei|o__Desulfurococcales|f__Pyrodictiaceae|g__Pyrodictium|s__Pyrodictium_delaneyi|t__SGB916
SGB	917	0	1	kSGB	Species	k__Archaea|p__Crenarchaeota|c__Thermoprotei|o__Desulfurococcales|f__Pyrodictiaceae|g__Pyrodictium|s__Pyrodictium_occultum|t__SGB917
SGB	918	0	1	kSGB	Species	k__Archaea|p__Crenarchaeota|c__Thermoprotei|o__Desulfurococcales|f__Pyrodictiaceae|g__Hyperthermus|s__Hyperthermus_butylicus|t__SGB918
SGB	919	0	1	kSGB	Species	k__Archaea|p__Crenarchaeota|c__Thermoprotei|o__Desulfurococcales|f__Pyrodictiaceae|g__Pyrolobus|s__Pyrolobus_fumarii|t__SGB919
SGB	920	0	1	kSGB	Species	k__Archaea|p__Crenarchaeota|c__Thermoprotei|o__Desulfurococcales|f__Desulfurococcaceae|g__Ignisphaera|s__Ignisphaera_aggregans|t__SGB920
SGB	921	0	1	kSGB	Species	k__Archaea|p__Candidatus_Bathyarchaeota|c__Candidatus_Bathyarchaeota_unclassified|o__Candidatus_Bathyarchaeota_unclassified|f__Candidatus_Bathyarchaeota_unclassified|g__Candidatus_Bathyarchaeota_unclassified|s__miscellaneous_Crenarchaeota_group_archaeon_SMTZ1_55|t__SGB921
SGB	922	0	1	kSGB	Species	k__Archaea|p__Candidatus_Bathyarchaeota|c__Candidatus_Bathyarchaeota_unclassified|o__Candidatus_Bathyarchaeota_unclassified|f__Candidatus_Bathyarchaeota_unclassified|g__Candidatus_Bathyarchaeota_unclassified|s__Candidatus_Bathyarchaeota_archaeon_RBG_16_48_13|t__SGB922
SGB	923	0	1	kSGB	Species	k__Archaea|p__Candidatus_Bathyarchaeota|c__Candidatus_Bathyarchaeota_unclassified|o__Candidatus_Bathyarchaeota_unclassified|f__Candidatus_Bathyarchaeota_unclassified|g__Candidatus_Bathyarchaeota_unclassified|s__Candidatus_Bathyarchaeota_archaeon_ex4484_205|t__SGB923
SGB	924	0	2	kSGB	Species	k__Bacteria|p__Candidatus_Roizmanbacteria|c__Candidatus_Roizmanbacteria_unclassified|o__Candidatus_Roizmanbacteria_unclassified|f__Candidatus_Roizmanbacteria_unclassified|g__Candidatus_Roizmanbacteria_unclassified|s__Candidatus_Roizmanbacteria_bacterium_RIFCSPLOWO2_01_FULL_38_11|t__SGB924
SGB	925	0	2	kSGB	Species	k__Archaea|p__Archaea_unclassified|c__Archaea_unclassified|o__Archaea_unclassified|f__Archaea_unclassified|g__Archaea_unclassified|s__archaeon_HR05|t__SGB925
SGB	926	0	1	kSGB	Species	k__Archaea|p__Archaea_unclassified|c__Archaea_unclassified|o__Archaea_unclassified|f__Archaea_unclassified|g__Archaea_unclassified|s__archaeon_HR04|t__SGB926
SGB	927	0	1	kSGB	Species	k__Archaea|p__Candidatus_Bathyarchaeota|c__Candidatus_Bathyarchaeota_unclassified|o__Candidatus_Bathyarchaeota_unclassified|f__Candidatus_Bathyarchaeota_unclassified|g__Candidatus_Bathyarchaeota_unclassified|s__Candidatus_Bathyarchaeota_archaeon|t__SGB927
SGB	928	0	1	kSGB	Species	k__Archaea|p__Candidatus_Bathyarchaeota|c__Candidatus_Bathyarchaeota_unclassified|o__Candidatus_Bathyarchaeota_unclassified|f__Candidatus_Bathyarchaeota_unclassified|g__Candidatus_Bathyarchaeota_unclassified|s__Candidatus_Bathyarchaeota_archaeon|t__SGB928
SGB	929	0	1	kSGB	Species	k__Archaea|p__Candidatus_Bathyarchaeota|c__Candidatus_Bathyarchaeota_unclassified|o__Candidatus_Bathyarchaeota_unclassified|f__Candidatus_Bathyarchaeota_unclassified|g__Candidatus_Bathyarchaeota_unclassified|s__Candidatus_Bathyarchaeota_archaeon|t__SGB929
SGB	930	0	1	kSGB	Species	k__Archaea|p__Candidatus_Bathyarchaeota|c__Candidatus_Bathyarchaeota_unclassified|o__Candidatus_Bathyarchaeota_unclassified|f__Candidatus_Bathyarchaeota_unclassified|g__Candidatus_Bathyarchaeota_unclassified|s__Candidatus_Bathyarchaeota_archaeon_RBG_13_46_16b|t__SGB930
SGB	931	0	1	kSGB	Species	k__Archaea|p__Candidatus_Bathyarchaeota|c__Candidatus_Bathyarchaeota_unclassified|o__Candidatus_Bathyarchaeota_unclassified|f__Candidatus_Bathyarchaeota_unclassified|g__Candidatus_Bathyarchaeota_unclassified|s__Candidatus_Bathyarchaeota_archaeon_CG07_land_8_20_14_0_80_47_9|t__SGB931
SGB	932	0	1	kSGB	Species	k__Archaea|p__Candidatus_Bathyarchaeota|c__Candidatus_Bathyarchaeota_unclassified|o__Candidatus_Bathyarchaeota_unclassified|f__Candidatus_Bathyarchaeota_unclassified|g__Candidatus_Bathyarchaeota_unclassified|s__miscellaneous_Crenarchaeota_group_1_archaeon_SG8_32_3|t__SGB932
SGB	933	0	1	kSGB	Species	k__Archaea|p__Candidatus_Bathyarchaeota|c__Candidatus_Bathyarchaeota_unclassified|o__Candidatus_Bathyarchaeota_unclassified|f__Candidatus_Bathyarchaeota_unclassified|g__Candidatus_Bathyarchaeota_unclassified|s__miscellaneous_Crenarchaeota_group_6_archaeon_AD8_1|t__SGB933
SGB	934	0	1	kSGB	Species	k__Archaea|p__Candidatus_Bathyarchaeota|c__Candidatus_Bathyarchaeota_unclassified|o__Candidatus_Bathyarchaeota_unclassified|f__Candidatus_Bathyarchaeota_unclassified|g__Candidatus_Bathyarchaeota_unclassified|s__Candidatus_Bathyarchaeota_archaeon|t__SGB934
SGB	936	0	1	kSGB	Species	k__Archaea|p__Candidatus_Bathyarchaeota|c__Candidatus_Bathyarchaeota_unclassified|o__Candidatus_Bathyarchaeota_unclassified|f__Candidatus_Bathyarchaeota_unclassified|g__Candidatus_Bathyarchaeota_unclassified|s__Candidatus_Bathyarchaeota_archaeon_RBG_13_38_9|t__SGB936
SGB	937	0	1	kSGB	Species	k__Archaea|p__Candidatus_Bathyarchaeota|c__Candidatus_Bathyarchaeota_unclassified|o__Candidatus_Bathyarchaeota_unclassified|f__Candidatus_Bathyarchaeota_unclassified|g__Candidatus_Bathyarchaeota_unclassified|s__Candidatus_Bathyarchaeota_archaeon_ex4484_231|t__SGB937
SGB	942	0	1	kSGB	Species	k__Archaea|p__Candidatus_Bathyarchaeota|c__Candidatus_Bathyarchaeota_unclassified|o__Candidatus_Bathyarchaeota_unclassified|f__Candidatus_Bathyarchaeota_unclassified|g__Candidatus_Bathyarchaeota_unclassified|s__Candidatus_Bathyarchaeota_archaeon_B63|t__SGB942
SGB	943	0	1	kSGB	Species	k__Archaea|p__Candidatus_Bathyarchaeota|c__Candidatus_Bathyarchaeota_unclassified|o__Candidatus_Bathyarchaeota_unclassified|f__Candidatus_Bathyarchaeota_unclassified|g__Candidatus_Bathyarchaeota_unclassified|s__Candidatus_Bathyarchaeota_archaeon_B24|t__SGB943
SGB	944	0	1	kSGB	Species	k__Archaea|p__Candidatus_Bathyarchaeota|c__Candidatus_Bathyarchaeota_unclassified|o__Candidatus_Bathyarchaeota_unclassified|f__Candidatus_Bathyarchaeota_unclassified|g__Candidatus_Bathyarchaeota_unclassified|s__Candidatus_Bathyarchaeota_archaeon_B24_2|t__SGB944
SGB	945	0	1	kSGB	Species	k__Archaea|p__Candidatus_Bathyarchaeota|c__Candidatus_Bathyarchaeota_unclassified|o__Candidatus_Bathyarchaeota_unclassified|f__Candidatus_Bathyarchaeota_unclassified|g__Candidatus_Bathyarchaeota_unclassified|s__Candidatus_Bathyarchaeota_archaeon_B25|t__SGB945
SGB	946	0	1	kSGB	Species	k__Archaea|p__Candidatus_Bathyarchaeota|c__Candidatus_Bathyarchaeota_unclassified|o__Candidatus_Bathyarchaeota_unclassified|f__Candidatus_Bathyarchaeota_unclassified|g__Candidatus_Bathyarchaeota_unclassified|s__Candidatus_Bathyarchaeota_archaeon_BA2|t__SGB946
SGB	947	0	1	kSGB	Species	k__Archaea|p__Candidatus_Bathyarchaeota|c__Candidatus_Bathyarchaeota_unclassified|o__Candidatus_Bathyarchaeota_unclassified|f__Candidatus_Bathyarchaeota_unclassified|g__Candidatus_Bathyarchaeota_unclassified|s__Candidatus_Bathyarchaeota_archaeon_BA1|t__SGB947
SGB	948	0	1	kSGB	Species	k__Archaea|p__Archaea_unclassified|c__Archaea_unclassified|o__Archaea_unclassified|f__Archaea_unclassified|g__Archaea_unclassified|s__archaeon_HR06|t__SGB948
SGB	951	0	1	kSGB	Species	k__Bacteria|p__Chlorobi|c__Chlorobi_unclassified|o__Chlorobi_unclassified|f__Chlorobi_unclassified|g__Chlorobi_unclassified|s__Chlorobi_bacterium_OLB6|t__SGB951
SGB	952	0	1	kSGB	Species	k__Bacteria|p__Candidatus_Microgenomates|c__Candidatus_Microgenomates_unclassified|o__Candidatus_Microgenomates_unclassified|f__Candidatus_Microgenomates_unclassified|g__Candidatus_Microgenomates_unclassified|s__Microgenomates_bacterium_OLB23|t__SGB952
SGB	953	0	1	kSGB	Species	k__Bacteria|p__Candidatus_Gracilibacteria|c__Candidatus_Gracilibacteria_unclassified|o__Candidatus_Gracilibacteria_unclassified|f__Candidatus_Gracilibacteria_unclassified|g__Candidatus_Gracilibacteria_unclassified|s__Candidatus_Gracilibacteria_bacterium_CG17_big_fil_post_rev_8_21_14_2_50_48_13|t__SGB953
SGB	955	2	0	uSGB	Other	k__Bacteria|p__Firmicutes|c__CFGB320|o__OFGB320|f__FGB320|g__GGB741|s__GGB741_SGB955|t__SGB955
SGB	956	1	0	uSGB	Other	k__Bacteria|p__Firmicutes|c__CFGB320|o__OFGB320|f__FGB320|g__GGB741|s__GGB741_SGB956|t__SGB956
SGB	957	2	0	uSGB	Other	k__Bacteria|p__Actinobacteria|c__CFGB321|o__OFGB321|f__FGB321|g__GGB742|s__GGB742_SGB957|t__SGB957
SGB	960	3	1	kSGB	Species	k__Bacteria|p__Actinobacteria|c__Coriobacteriia|o__Coriobacteriales|f__Coriobacteriaceae|g__Coriobacteriaceae_unclassified|s__Coriobacteriaceae_bacterium_BV3Ac1|t__SGB960
SGB	961	0	1	kSGB	Species	k__Bacteria|p__Actinobacteria|c__Coriobacteriia|o__Coriobacteriales|f__Atopobiaceae|g__Atopobium|s__Atopobium_sp_oral_taxon_810|t__SGB961
SGB	962	1	1	kSGB	Species	k__Bacteria|p__Actinobacteria|c__Coriobacteriia|o__Eggerthellales|f__Eggerthellaceae|g__Cryptobacterium|s__Cryptobacterium_curtum|t__SGB962
SGB	963	7	1	kSGB	Species	k__Bacteria|p__Actinobacteria|c__Coriobacteriia|o__Coriobacteriales|f__Coriobacteriales_unclassified|g__Coriobacteriales_unclassified|s__Coriobacteriales_bacterium_DNF00809|t__SGB963
SGB	964	2	1	kSGB	Species	k__Bacteria|p__Actinobacteria|c__Coriobacteriia|o__Coriobacteriales|f__Atopobiaceae|g__Atopobium|s__Atopobium_parvulum|t__SGB964
SGB	965	2	0	uSGB	Genus	k__Bacteria|p__Actinobacteria|c__Coriobacteriia|o__Coriobacteriales|f__Atopobiaceae|g__Atopobium|s__Atopobium_SGB965|t__SGB965
SGB	966	2	0	uSGB	Genus	k__Bacteria|p__Actinobacteria|c__Coriobacteriia|o__Coriobacteriales|f__Atopobiaceae|g__Atopobium|s__Atopobium_SGB966|t__SGB966
SGB	967	1	0	uSGB	Genus	k__Bacteria|p__Actinobacteria|c__Coriobacteriia|o__Coriobacteriales|f__Atopobiaceae|g__Atopobium|s__Atopobium_SGB967|t__SGB967
SGB	968	1	0	uSGB	Genus	k__Bacteria|p__Actinobacteria|c__Coriobacteriia|o__Coriobacteriales|f__Atopobiaceae|g__Atopobium|s__Atopobium_SGB968|t__SGB968
SGB	969	1	0	uSGB	Genus	k__Bacteria|p__Actinobacteria|c__Coriobacteriia|o__Coriobacteriales|f__Atopobiaceae|g__Atopobium|s__Atopobium_SGB969|t__SGB969
SGB	970	2	0	uSGB	Genus	k__Bacteria|p__Actinobacteria|c__Coriobacteriia|o__Coriobacteriales|f__Atopobiaceae|g__Atopobium|s__Atopobium_SGB970|t__SGB970
SGB	971	3	0	uSGB	Genus	k__Bacteria|p__Actinobacteria|c__Coriobacteriia|o__Coriobacteriales|f__Atopobiaceae|g__Atopobium|s__Atopobium_SGB971|t__SGB971
SGB	972	78	3	kSGB	Species	k__Bacteria|p__Actinobacteria|c__Coriobacteriia|o__Coriobacteriales|f__Atopobiaceae|g__Atopobium|s__Atopobium_sp_ICM42b|t__SGB972
SGB	973	1	0	uSGB	Genus	k__Bacteria|p__Actinobacteria|c__Coriobacteriia|o__Coriobacteriales|f__Atopobiaceae|g__Atopobium|s__Atopobium_SGB973|t__SGB973
SGB	974	1	0	uSGB	Genus	k__Bacteria|p__Actinobacteria|c__Coriobacteriia|o__Coriobacteriales|f__Atopobiaceae|g__Atopobium|s__Atopobium_SGB974|t__SGB974
SGB	975	1	0	uSGB	Genus	k__Bacteria|p__Actinobacteria|c__Coriobacteriia|o__Coriobacteriales|f__Atopobiaceae|g__Atopobium|s__Atopobium_SGB975|t__SGB975
SGB	976	1	0	uSGB	Genus	k__Bacteria|p__Actinobacteria|c__Coriobacteriia|o__Coriobacteriales|f__Atopobiaceae|g__Atopobium|s__Atopobium_SGB976|t__SGB976
SGB	977	1	0	uSGB	Genus	k__Bacteria|p__Actinobacteria|c__Coriobacteriia|o__Coriobacteriales|f__Atopobiaceae|g__Atopobium|s__Atopobium_SGB977|t__SGB977
SGB	978	1	0	uSGB	Genus	k__Bacteria|p__Actinobacteria|c__Coriobacteriia|o__Coriobacteriales|f__Atopobiaceae|g__Atopobium|s__Atopobium_SGB978|t__SGB978
SGB	979	1	0	uSGB	Genus	k__Bacteria|p__Actinobacteria|c__Coriobacteriia|o__Coriobacteriales|f__Atopobiaceae|g__Atopobium|s__Atopobium_SGB979|t__SGB979
SGB	980	1	0	uSGB	Genus	k__Bacteria|p__Actinobacteria|c__Coriobacteriia|o__Coriobacteriales|f__Atopobiaceae|g__Atopobium|s__Atopobium_SGB980|t__SGB980
SGB	981	1	0	uSGB	Genus	k__Bacteria|p__Actinobacteria|c__Coriobacteriia|o__Coriobacteriales|f__Atopobiaceae|g__Atopobium|s__Atopobium_SGB981|t__SGB981
SGB	982	1	0	uSGB	Genus	k__Bacteria|p__Actinobacteria|c__Coriobacteriia|o__Coriobacteriales|f__Atopobiaceae|g__Atopobium|s__Atopobium_SGB982|t__SGB982
SGB	983	1	0	uSGB	Genus	k__Bacteria|p__Actinobacteria|c__Coriobacteriia|o__Coriobacteriales|f__Atopobiaceae|g__Atopobium|s__Atopobium_SGB983|t__SGB983
SGB	984	1	1	kSGB	Species	k__Bacteria|p__Actinobacteria|c__Coriobacteriia|o__Coriobacteriales|f__Atopobiaceae|g__Atopobium|s__Atopobium_sp_oral_taxon_199|t__SGB984
SGB	985	5	3	kSGB	Species	k__Bacteria|p__Actinobacteria|c__Coriobacteriia|o__Coriobacteriales|f__Atopobiaceae|g__Atopobium|s__Atopobium_rimae|t__SGB985
SGB	986	1	0	uSGB	Genus	k__Bacteria|p__Actinobacteria|c__Coriobacteriia|o__Coriobacteriales|f__Atopobiaceae|g__Atopobium|s__Atopobium_SGB986|t__SGB986
SGB	987	2	4	kSGB	Species	k__Bacteria|p__Actinobacteria|c__Coriobacteriia|o__Coriobacteriales|f__Atopobiaceae|g__Atopobium|s__Atopobium_minutum|t__SGB987
SGB	988	0	1	kSGB	Species	k__Bacteria|p__Actinobacteria|c__Coriobacteriia|o__Coriobacteriales|f__Atopobiaceae|g__Atopobium|s__Atopobium_deltae|t__SGB988
SGB	989	2	0	uSGB	Family	k__Bacteria|p__Actinobacteria|c__Coriobacteriia|o__Coriobacteriales|f__Atopobiaceae|g__GGB753|s__GGB753_SGB989|t__SGB989
SGB	990	2	1	kSGB	Species	k__Bacteria|p__Actinobacteria|c__Coriobacteriia|o__Coriobacteriales|f__Atopobiaceae|g__Atopobium|s__Atopobium_vaginae|t__SGB990
SGB	991	15	3	kSGB	Species	k__Bacteria|p__Actinobacteria|c__Coriobacteriia|o__Coriobacteriales|f__Atopobiaceae|g__Atopobium|s__Atopobium_vaginae|t__SGB991
SGB	992	1	0	uSGB	Genus	k__Bacteria|p__Actinobacteria|c__Coriobacteriia|o__Coriobacteriales|f__Atopobiaceae|g__Atopobium|s__Atopobium_SGB992|t__SGB992
SGB	993	8	0	uSGB	Other	k__Bacteria|p__Firmicutes|c__CFGB330|o__OFGB330|f__FGB330|g__GGB756|s__GGB756_SGB993|t__SGB993
SGB	994	11	0	uSGB	Other	k__Bacteria|p__Firmicutes|c__CFGB330|o__OFGB330|f__FGB330|g__GGB756|s__GGB756_SGB994|t__SGB994
SGB	997	3	0	uSGB	Other	k__Bacteria|p__Firmicutes|c__CFGB332|o__OFGB332|f__FGB332|g__GGB759|s__GGB759_SGB997|t__SGB997
SGB	1001	2	0	uSGB	Other	k__Bacteria|p__Firmicutes|c__CFGB336|o__OFGB336|f__FGB336|g__GGB763|s__GGB763_SGB1001|t__SGB1001
SGB	1002	16	0	uSGB	Other	k__Bacteria|p__Firmicutes|c__CFGB336|o__OFGB336|f__FGB336|g__GGB763|s__GGB763_SGB1002|t__SGB1002
SGB	1005	15	0	uSGB	Other	k__Bacteria|p__Firmicutes|c__CFGB337|o__OFGB337|f__FGB337|g__GGB765|s__GGB765_SGB1005|t__SGB1005
SGB	1016	20	0	uSGB	Other	k__Bacteria|p__Firmicutes|c__CFGB341|o__OFGB341|f__FGB341|g__GGB775|s__GGB775_SGB1016|t__SGB1016
SGB	1017	1	0	uSGB	Other	k__Bacteria|p__Firmicutes|c__CFGB341|o__OFGB341|f__FGB341|g__GGB775|s__GGB775_SGB1017|t__SGB1017
SGB	1019	3	0	uSGB	Other	k__Bacteria|p__Firmicutes|c__CFGB342|o__OFGB342|f__FGB342|g__GGB776|s__GGB776_SGB1019|t__SGB1019
SGB	1021	3	0	uSGB	Other	k__Bacteria|p__Firmicutes|c__CFGB342|o__OFGB342|f__FGB342|g__GGB778|s__GGB778_SGB1021|t__SGB1021
SGB	1022	8	0	uSGB	Other	k__Bacteria|p__Firmicutes|c__CFGB342|o__OFGB342|f__FGB342|g__GGB779|s__GGB779_SGB1022|t__SGB1022
SGB	1024	193	1	kSGB	Species	k__Bacteria|p__Firmicutes|c__Clostridia|o__Clostridiales|f__Clostridiaceae|g__Clostridium|s__Clostridium_sp_CAG_568|t__SGB1024
SGB	1028	0	1	kSGB	Species	k__Bacteria|p__Proteobacteria|c__Deltaproteobacteria|o__Syntrophobacterales|f__Syntrophobacteraceae|g__Thermodesulforhabdus|s__Thermodesulforhabdus_norvegica|t__SGB1028
SGB	1029	0	1	kSGB	Species	k__Bacteria|p__Proteobacteria|c__Deltaproteobacteria|o__Myxococcales|f__Myxococcales_unclassified|g__Myxococcales_unclassified|s__Myxococcales_bacterium|t__SGB1029
SGB	1030	0	1	kSGB	Species	k__Bacteria|p__Verrucomicrobia|c__Verrucomicrobiae|o__Verrucomicrobiales|f__Verrucomicrobiales_unclassified|g__Verrucomicrobiales_unclassified|s__Verrucomicrobiales_bacterium|t__SGB1030
SGB	1031	0	1	kSGB	Species	k__Bacteria|p__Chloroflexi|c__Chloroflexi_unclassified|o__Chloroflexi_unclassified|f__Chloroflexi_unclassified|g__Chloroflexi_unclassified|s__Chloroflexi_bacterium|t__SGB1031
SGB	1033	0	1	kSGB	Species	k__Bacteria|p__Proteobacteria|c__Deltaproteobacteria|o__Desulfobacterales|f__Desulfobacteraceae|g__Desulfofaba|s__Desulfofaba_hansenii|t__SGB1033
SGB	1034	0	1	kSGB	Species	k__Bacteria|p__Chloroflexi|c__Chloroflexi_unclassified|o__Chloroflexi_unclassified|f__Chloroflexi_unclassified|g__Chloroflexi_unclassified|s__Chloroflexi_bacterium|t__SGB1034
SGB	1037	11	0	uSGB	Other	k__Bacteria|p__Proteobacteria|c__CFGB355|o__OFGB355|f__FGB355|g__GGB794|s__GGB794_SGB1037|t__SGB1037
SGB	1039	0	1	kSGB	Species	k__Bacteria|p__Bacteria_unclassified|c__Bacteria_unclassified|o__Bacteria_unclassified|f__Bacteria_unclassified|g__Bacteria_unclassified|s__bacterium_HR20|t__SGB1039
SGB	1042	0	1	kSGB	Species	k__Bacteria|p__Proteobacteria|c__Alphaproteobacteria|o__Rhodobacterales|f__Rhodobacteraceae|g__Planktomarina|s__Planktomarina_temperata|t__SGB1042
SGB	1044	0	1	kSGB	Species	k__Bacteria|p__Proteobacteria|c__Alphaproteobacteria|o__Kordiimonadales|f__Kordiimonadaceae|g__Kordiimonas|s__Kordiimonas_sp|t__SGB1044
SGB	1045	0	1	kSGB	Species	k__Bacteria|p__Proteobacteria|c__Alphaproteobacteria|o__Alphaproteobacteria_unclassified|f__Alphaproteobacteria_unclassified|g__Emcibacter|s__Emcibacter_sp_ZYL|t__SGB1045
SGB	1048	0	1	kSGB	Species	k__Bacteria|p__Proteobacteria|c__Alphaproteobacteria|o__Rhizobiales|f__Rhodobiaceae|g__Rhodobiaceae_unclassified|s__Rhodobiaceae_bacterium|t__SGB1048
SGB	1051	0	1	kSGB	Species	k__Bacteria|p__Proteobacteria|c__Alphaproteobacteria|o__Alphaproteobacteria_unclassified|f__Alphaproteobacteria_unclassified|g__Alphaproteobacteria_unclassified|s__alpha_proteobacterium_IMCC14465|t__SGB1051
SGB	1052	0	1	kSGB	Species	k__Bacteria|p__Proteobacteria|c__Alphaproteobacteria|o__Alphaproteobacteria_unclassified|f__Alphaproteobacteria_unclassified|g__Candidatus_Micropelagos|s__Candidatus_Micropelagos_thuwalensis|t__SGB1052
SGB	1058	0	1	kSGB	Species	k__Bacteria|p__Proteobacteria|c__Alphaproteobacteria|o__Pelagibacterales|f__Pelagibacteraceae|g__Pelagibacteraceae_unclassified|s__Pelagibacteraceae_bacterium|t__SGB1058
SGB	1061	0	2	kSGB	Species	k__Bacteria|p__Proteobacteria|c__Gammaproteobacteria|o__Thiotrichales|f__Thiotrichales_unclassified|g__Thiotrichales_unclassified|s__Thiotrichales_bacterium|t__SGB1061
SGB	1062	0	1	kSGB	Species	k__Bacteria|p__Proteobacteria|c__Proteobacteria_unclassified|o__Proteobacteria_unclassified|f__Proteobacteria_unclassified|g__Proteobacteria_unclassified|s__Proteobacteria_bacterium_TMED261|t__SGB1062
SGB	1064	0	2	kSGB	Species	k__Bacteria|p__Nitrospinae|c__Nitrospinae_unclassified|o__Nitrospinae_unclassified|f__Nitrospinae_unclassified|g__Nitrospinae_unclassified|s__Nitrospinae_bacterium_RIFCSPHIGHO2_02_39_11|t__SGB1064
SGB	1065	0	1	kSGB	Species	k__Bacteria|p__Nitrospinae|c__Nitrospinae_unclassified|o__Nitrospinae_unclassified|f__Nitrospinae_unclassified|g__Nitrospinae_unclassified|s__Nitrospinae_bacterium_RIFCSPLOWO2_12_39_16|t__SGB1065
SGB	1068	0	1	kSGB	Species	k__Bacteria|p__Chloroflexi|c__Chloroflexi_unclassified|o__Chloroflexi_unclassified|f__Chloroflexi_unclassified|g__Chloroflexi_unclassified|s__Chloroflexi_bacterium|t__SGB1068
SGB	1087	0	1	kSGB	Species	k__Bacteria|p__Bacteria_unclassified|c__Bacteria_unclassified|o__Bacteria_unclassified|f__Bacteria_unclassified|g__Bacteria_unclassified|s__bacterium_I07|t__SGB1087
SGB	1088	0	1	kSGB	Species	k__Bacteria|p__Bacteria_unclassified|c__Bacteria_unclassified|o__Bacteria_unclassified|f__Bacteria_unclassified|g__Bacteria_unclassified|s__bacterium_G20|t__SGB1088
SGB	1090	0	1	kSGB	Species	k__Bacteria|p__Ignavibacteriae|c__Ignavibacteriae_unclassified|o__Ignavibacteriae_unclassified|f__Ignavibacteriae_unclassified|g__Ignavibacteriae_unclassified|s__Ignavibacteriae_bacterium_HGW_Ignavibacteriae_4|t__SGB1090
SGB	1091	0	1	kSGB	Species	k__Bacteria|p__Candidatus_Cloacimonetes|c__Candidatus_Cloacimonetes_unclassified|o__Candidatus_Cloacimonetes_unclassified|f__Candidatus_Cloacimonetes_unclassified|g__Candidatus_Cloacimonetes_unclassified|s__Candidatus_Cloacimonetes_bacterium_4572_65|t__SGB1091
SGB	1092	0	1	kSGB	Species	k__Bacteria|p__Proteobacteria|c__Alphaproteobacteria|o__Rhodobacterales|f__Rhodobacteraceae|g__Rhodobacteraceae_unclassified|s__Rhodobacteraceae_bacterium_SB2|t__SGB1092
SGB	1093	0	2	kSGB	Species	k__Bacteria|p__Proteobacteria|c__Alphaproteobacteria|o__Rickettsiales|f__Rickettsiales_unclassified|g__Rickettsiales_unclassified|s__Rickettsiales_bacterium_TMED131|t__SGB1093
SGB	1094	0	1	kSGB	Species	k__Bacteria|p__Proteobacteria|c__Alphaproteobacteria|o__Rickettsiales|f__Rickettsiales_unclassified|g__Rickettsiales_unclassified|s__Rickettsiales_bacterium|t__SGB1094
SGB	1096	0	1	kSGB	Species	k__Bacteria|p__Cyanobacteria|c__Cyanobacteria_unclassified|o__Chroococcales|f__Aphanothecaceae|g__Rubidibacter|s__Rubidibacter_lacunae|t__SGB1096
SGB	1099	0	3	kSGB	Species	k__Bacteria|p__Proteobacteria|c__Alphaproteobacteria|o__Rickettsiales|f__Rickettsiales_unclassified|g__Rickettsiales_unclassified|s__Rickettsiales_bacterium|t__SGB1099
SGB	1101	0	1	kSGB	Species	k__Bacteria|p__Cyanobacteria|c__Cyanobacteria_unclassified|o__Cyanobacteria_unclassified|f__Cyanobacteria_unclassified|g__Cyanobacteria_unclassified|s__Cyanobacteria_bacterium_M5B4|t__SGB1101
SGB	1102	0	1	kSGB	Species	k__Bacteria|p__Candidatus_Latescibacteria|c__Candidatus_Latescibacteria_unclassified|o__Candidatus_Latescibacteria_unclassified|f__Candidatus_Latescibacteria_unclassified|g__Candidatus_Latescibacteria_unclassified|s__Latescibacteria_bacterium_DG_63|t__SGB1102
SGB	1104	0	1	kSGB	Species	k__Bacteria|p__Proteobacteria|c__Alphaproteobacteria|o__Rhodospirillales|f__Rhodospirillaceae|g__Rhodospirillaceae_unclassified|s__Rhodospirillaceae_bacterium|t__SGB1104
SGB	1105	0	1	kSGB	Species	k__Bacteria|p__Proteobacteria|c__Alphaproteobacteria|o__Rickettsiales|f__Rickettsiales_unclassified|g__Rickettsiales_unclassified|s__Rickettsiales_bacterium|t__SGB1105
SGB	1106	0	1	kSGB	Species	k__Bacteria|p__Proteobacteria|c__Alphaproteobacteria|o__Rhizobiales|f__Beijerinckiaceae|g__Beijerinckiaceae_unclassified|s__Beijerinckiaceae_bacterium|t__SGB1106
SGB	1108	0	1	kSGB	Species	k__Bacteria|p__Proteobacteria|c__Alphaproteobacteria|o__Alphaproteobacteria_unclassified|f__Alphaproteobacteria_unclassified|g__Alphaproteobacteria_unclassified|s__SAR116_cluster_bacterium|t__SGB1108
SGB	1109	0	1	kSGB	Species	k__Bacteria|p__Proteobacteria|c__Zetaproteobacteria|o__Zetaproteobacteria_unclassified|f__Zetaproteobacteria_unclassified|g__Zetaproteobacteria_unclassified|s__Zetaproteobacteria_bacterium|t__SGB1109
SGB	1125	0	1	kSGB	Species	k__Bacteria|p__Proteobacteria|c__Alphaproteobacteria|o__Rickettsiales|f__Rickettsiales_unclassified|g__Rickettsiales_unclassified|s__Rickettsiales_bacterium|t__SGB1125
SGB	1126	0	1	kSGB	Species	k__Bacteria|p__Proteobacteria|c__Alphaproteobacteria|o__Rickettsiales|f__Rickettsiales_unclassified|g__Rickettsiales_unclassified|s__Rickettsiales_bacterium|t__SGB1126
SGB	1132	0	1	kSGB	Species	k__Bacteria|p__Proteobacteria|c__Alphaproteobacteria|o__Alphaproteobacteria_unclassified|f__Alphaproteobacteria_unclassified|g__Alphaproteobacteria_unclassified|s__SAR116_cluster_bacterium|t__SGB1132
SGB	1133	0	1	kSGB	Species	k__Bacteria|p__Proteobacteria|c__Alphaproteobacteria|o__Alphaproteobacteria_unclassified|f__Alphaproteobacteria_unclassified|g__Alphaproteobacteria_unclassified|s__SAR116_cluster_bacterium|t__SGB1133
SGB	1134	0	1	kSGB	Species	k__Bacteria|p__Proteobacteria|c__Alphaproteobacteria|o__Alphaproteobacteria_unclassified|f__Alphaproteobacteria_unclassified|g__Alphaproteobacteria_unclassified|s__SAR116_cluster_bacterium|t__SGB1134
SGB	1135	0	1	kSGB	Species	k__Bacteria|p__Proteobacteria|c__Alphaproteobacteria|o__Alphaproteobacteria_unclassified|f__Alphaproteobacteria_unclassified|g__Alphaproteobacteria_unclassified|s__SAR116_cluster_bacterium|t__SGB1135
SGB	1136	0	2	kSGB	Species	k__Bacteria|p__Proteobacteria|c__Alphaproteobacteria|o__Alphaproteobacteria_unclassified|f__Alphaproteobacteria_unclassified|g__Candidatus_Puniceispirillum|s__Candidatus_Puniceispirillum_sp_TMED213|t__SGB1136
SGB	1138	0	1	kSGB	Species	k__Bacteria|p__Proteobacteria|c__Alphaproteobacteria|o__Alphaproteobacteria_unclassified|f__Alphaproteobacteria_unclassified|g__Alphaproteobacteria_unclassified|s__SAR116_cluster_alpha_proteobacterium_HIMB100|t__SGB1138
SGB	1139	0	1	kSGB	Species	k__Bacteria|p__Proteobacteria|c__Alphaproteobacteria|o__Alphaproteobacteria_unclassified|f__Alphaproteobacteria_unclassified|g__Alphaproteobacteria_unclassified|s__SAR116_cluster_bacterium|t__SGB1139
SGB	1140	0	1	kSGB	Species	k__Bacteria|p__Proteobacteria|c__Alphaproteobacteria|o__Alphaproteobacteria_unclassified|f__Alphaproteobacteria_unclassified|g__Alphaproteobacteria_unclassified|s__SAR116_cluster_bacterium_MED_G05|t__SGB1140
SGB	1141	0	1	kSGB	Species	k__Bacteria|p__Proteobacteria|c__Alphaproteobacteria|o__Alphaproteobacteria_unclassified|f__Alphaproteobacteria_unclassified|g__Alphaproteobacteria_unclassified|s__SAR116_cluster_bacterium|t__SGB1141
SGB	1142	0	1	kSGB	Species	k__Bacteria|p__Proteobacteria|c__Alphaproteobacteria|o__Alphaproteobacteria_unclassified|f__Alphaproteobacteria_unclassified|g__Alphaproteobacteria_unclassified|s__SAR116_cluster_bacterium|t__SGB1142
SGB	1143	0	2	kSGB	Species	k__Bacteria|p__Proteobacteria|c__Alphaproteobacteria|o__Alphaproteobacteria_unclassified|f__Alphaproteobacteria_unclassified|g__Alphaproteobacteria_unclassified|s__SAR116_cluster_bacterium|t__SGB1143
SGB	1144	0	2	kSGB	Species	k__Bacteria|p__Proteobacteria|c__Alphaproteobacteria|o__Alphaproteobacteria_unclassified|f__Alphaproteobacteria_unclassified|g__Candidatus_Puniceispirillum|s__Candidatus_Puniceispirillum_sp_TMED245|t__SGB1144
SGB	1145	0	2	kSGB	Species	k__Bacteria|p__Proteobacteria|c__Alphaproteobacteria|o__Alphaproteobacteria_unclassified|f__Alphaproteobacteria_unclassified|g__Candidatus_Puniceispirillum|s__Candidatus_Puniceispirillum_sp_TMED176|t__SGB1145
SGB	1146	0	3	kSGB	Species	k__Bacteria|p__Proteobacteria|c__Alphaproteobacteria|o__Alphaproteobacteria_unclassified|f__Alphaproteobacteria_unclassified|g__Alphaproteobacteria_unclassified|s__SAR116_cluster_bacterium|t__SGB1146
SGB	1147	0	1	kSGB	Species	k__Bacteria|p__Proteobacteria|c__Alphaproteobacteria|o__Alphaproteobacteria_unclassified|f__Alphaproteobacteria_unclassified|g__Candidatus_Puniceispirillum|s__Candidatus_Puniceispirillum_sp|t__SGB1147
SGB	1149	0	1	kSGB	Species	k__Bacteria|p__Proteobacteria|c__Alphaproteobacteria|o__Alphaproteobacteria_unclassified|f__Alphaproteobacteria_unclassified|g__Candidatus_Puniceispirillum|s__Candidatus_Puniceispirillum_marinum|t__SGB1149
SGB	1151	0	2	kSGB	Species	k__Bacteria|p__Proteobacteria|c__Alphaproteobacteria|o__Alphaproteobacteria_unclassified|f__Alphaproteobacteria_unclassified|g__Candidatus_Puniceispirillum|s__Candidatus_Puniceispirillum_sp_TMED52|t__SGB1151
SGB	1152	0	2	kSGB	Species	k__Bacteria|p__Proteobacteria|c__Alphaproteobacteria|o__Alphaproteobacteria_unclassified|f__Alphaproteobacteria_unclassified|g__Alphaproteobacteria_unclassified|s__SAR116_cluster_bacterium_MED_G04|t__SGB1152
SGB	1153	0	1	kSGB	Species	k__Bacteria|p__Proteobacteria|c__Gammaproteobacteria|o__Oceanospirillales|f__Oceanospirillales_unclassified|g__Oceanospirillales_unclassified|s__Oceanospirillales_bacterium_TMED59|t__SGB1153
SGB	1155	0	2	kSGB	Species	k__Bacteria|p__Proteobacteria|c__Alphaproteobacteria|o__Rhodospirillales|f__Acetobacteraceae|g__Commensalibacter|s__Commensalibacter_intestini|t__SGB1155
SGB	1156	0	1	kSGB	Species	k__Bacteria|p__Proteobacteria|c__Alphaproteobacteria|o__Rhodospirillales|f__Acetobacteraceae|g__Commensalibacter|s__Commensalibacter_sp_MX01|t__SGB1156
SGB	1157	0	1	kSGB	Species	k__Bacteria|p__Proteobacteria|c__Alphaproteobacteria|o__Rhodospirillales|f__Acetobacteraceae|g__Saccharibacter|s__Saccharibacter_sp_AM169|t__SGB1157
SGB	1158	0	1	kSGB	Species	k__Bacteria|p__Proteobacteria|c__Alphaproteobacteria|o__Rhodospirillales|f__Acetobacteraceae|g__Bombella|s__Bombella_intestini|t__SGB1158
SGB	1159	0	1	kSGB	Species	k__Bacteria|p__Proteobacteria|c__Alphaproteobacteria|o__Rhodospirillales|f__Acetobacteraceae|g__Parasaccharibacter|s__Parasaccharibacter_apium|t__SGB1159
SGB	1160	0	2	kSGB	Species	k__Bacteria|p__Proteobacteria|c__Alphaproteobacteria|o__Rhodospirillales|f__Acetobacteraceae|g__Gluconobacter|s__Gluconobacter_cerinus|t__SGB1160
SGB	1161	0	7	kSGB	Species	k__Bacteria|p__Proteobacteria|c__Alphaproteobacteria|o__Rhodospirillales|f__Acetobacteraceae|g__Gluconobacter|s__Gluconobacter_japonicus|t__SGB1161
SGB	1162	0	8	kSGB	Species	k__Bacteria|p__Proteobacteria|c__Alphaproteobacteria|o__Rhodospirillales|f__Acetobacteraceae|g__Gluconobacter|s__Gluconobacter_thailandicus|t__SGB1162
SGB	1163	0	1	kSGB	Species	k__Bacteria|p__Proteobacteria|c__Alphaproteobacteria|o__Rhodospirillales|f__Acetobacteraceae|g__Gluconobacter|s__Gluconobacter_japonicus|t__SGB1163
SGB	1164	0	4	kSGB	Species	k__Bacteria|p__Proteobacteria|c__Alphaproteobacteria|o__Rhodospirillales|f__Acetobacteraceae|g__Gluconobacter|s__Gluconobacter_albidus|t__SGB1164
SGB	1165	0	7	kSGB	Species	k__Bacteria|p__Proteobacteria|c__Alphaproteobacteria|o__Rhodospirillales|f__Acetobacteraceae|g__Gluconobacter|s__Gluconobacter_oxydans|t__SGB1165
SGB	1166	0	1	kSGB	Species	k__Bacteria|p__Proteobacteria|c__Alphaproteobacteria|o__Rhodospirillales|f__Acetobacteraceae|g__Gluconobacter|s__Gluconobacter_oxydans|t__SGB1166
SGB	1167	0	1	kSGB	Species	k__Bacteria|p__Proteobacteria|c__Alphaproteobacteria|o__Rhodospirillales|f__Acetobacteraceae|g__Gluconobacter|s__Gluconobacter_roseus|t__SGB1167
SGB	1168	0	1	kSGB	Species	k__Bacteria|p__Proteobacteria|c__Alphaproteobacteria|o__Rhodospirillales|f__Acetobacteraceae|g__Gluconobacter|s__Gluconobacter_morbifer|t__SGB1168
SGB	1169	0	1	kSGB	Species	k__Bacteria|p__Proteobacteria|c__Alphaproteobacteria|o__Rhodospirillales|f__Acetobacteraceae|g__Acetobacter|s__Acetobacter_aceti|t__SGB1169
SGB	1171	0	1	kSGB	Species	k__Bacteria|p__Proteobacteria|c__Alphaproteobacteria|o__Rhodospirillales|f__Acetobacteraceae|g__Acetobacter|s__Acetobacter_aceti|t__SGB1171
SGB	1172	0	3	kSGB	Species	k__Bacteria|p__Proteobacteria|c__Alphaproteobacteria|o__Rhodospirillales|f__Acetobacteraceae|g__Asaia|s__Asaia_sp_SF2_1|t__SGB1172
SGB	1173	0	1	kSGB	Species	k__Bacteria|p__Proteobacteria|c__Alphaproteobacteria|o__Rhodospirillales|f__Acetobacteraceae|g__Acidomonas|s__Acidomonas_methanolica|t__SGB1173
SGB	1174	0	2	kSGB	Species	k__Bacteria|p__Proteobacteria|c__Alphaproteobacteria|o__Rhodospirillales|f__Acetobacteraceae|g__Gluconacetobacter|s__Gluconacetobacter_diazotrophicus|t__SGB1174
SGB	1175	0	3	kSGB	Species	k__Bacteria|p__Proteobacteria|c__Alphaproteobacteria|o__Rhodospirillales|f__Acetobacteraceae|g__Komagataeibacter|s__Komagataeibacter_hansenii|t__SGB1175
SGB	1176	0	2	kSGB	Species	k__Bacteria|p__Proteobacteria|c__Alphaproteobacteria|o__Rhodospirillales|f__Acetobacteraceae|g__Komagataeibacter|s__Komagataeibacter_intermedius|t__SGB1176
SGB	1177	0	1	kSGB	Species	k__Bacteria|p__Proteobacteria|c__Alphaproteobacteria|o__Rhodospirillales|f__Acetobacteraceae|g__Komagataeibacter|s__Komagataeibacter_xylinus|t__SGB1177
SGB	1178	0	3	kSGB	Species	k__Bacteria|p__Proteobacteria|c__Alphaproteobacteria|o__Rhodospirillales|f__Acetobacteraceae|g__Komagataeibacter|s__Komagataeibacter_europaeus|t__SGB1178
SGB	1179	0	1	kSGB	Species	k__Bacteria|p__Proteobacteria|c__Alphaproteobacteria|o__Rhodospirillales|f__Acetobacteraceae|g__Komagataeibacter|s__Komagataeibacter_xylinus|t__SGB1179
SGB	1180	0	3	kSGB	Species	k__Bacteria|p__Proteobacteria|c__Alphaproteobacteria|o__Rhodospirillales|f__Acetobacteraceae|g__Gluconacetobacter|s__Gluconacetobacter_sp_SXCC_1|t__SGB1180
SGB	1181	0	1	kSGB	Species	k__Bacteria|p__Proteobacteria|c__Alphaproteobacteria|o__Rhodospirillales|f__Acetobacteraceae|g__Komagataeibacter|s__Komagataeibacter_medellinensis|t__SGB1181
SGB	1182	0	1	kSGB	Species	k__Bacteria|p__Proteobacteria|c__Alphaproteobacteria|o__Rhodospirillales|f__Acetobacteraceae|g__Komagataeibacter|s__Komagataeibacter_nataicola|t__SGB1182
SGB	1183	0	2	kSGB	Species	k__Bacteria|p__Proteobacteria|c__Alphaproteobacteria|o__Rhodospirillales|f__Acetobacteraceae|g__Kozakia|s__Kozakia_baliensis|t__SGB1183
SGB	1184	0	1	kSGB	Species	k__Bacteria|p__Proteobacteria|c__Alphaproteobacteria|o__Rhodospirillales|f__Acetobacteraceae|g__Tanticharoenia|s__Tanticharoenia_sakaeratensis|t__SGB1184
SGB	1185	0	1	kSGB	Species	k__Bacteria|p__Proteobacteria|c__Alphaproteobacteria|o__Rhodospirillales|f__Acetobacteraceae|g__Neoasaia|s__Neoasaia_chiangmaiensis|t__SGB1185
SGB	1186	0	2	kSGB	Species	k__Bacteria|p__Proteobacteria|c__Alphaproteobacteria|o__Rhodospirillales|f__Acetobacteraceae|g__Acetobacter|s__Acetobacter_sp_DmW_043|t__SGB1186
SGB	1187	0	4	kSGB	Species	k__Bacteria|p__Proteobacteria|c__Alphaproteobacteria|o__Rhodospirillales|f__Acetobacteraceae|g__Acetobacter|s__Acetobacter_orientalis|t__SGB1187
SGB	1188	0	2	kSGB	Species	k__Bacteria|p__Proteobacteria|c__Alphaproteobacteria|o__Rhodospirillales|f__Acetobacteraceae|g__Acetobacter|s__Acetobacter_cibinongensis|t__SGB1188
SGB	1189	0	3	kSGB	Species	k__Bacteria|p__Proteobacteria|c__Alphaproteobacteria|o__Rhodospirillales|f__Acetobacteraceae|g__Acetobacter|s__Acetobacter_syzygii|t__SGB1189
SGB	1190	0	3	kSGB	Species	k__Bacteria|p__Proteobacteria|c__Alphaproteobacteria|o__Rhodospirillales|f__Acetobacteraceae|g__Acetobacter|s__Acetobacter_fabarum|t__SGB1190
SGB	1191	0	1	kSGB	Species	k__Bacteria|p__Proteobacteria|c__Alphaproteobacteria|o__Rhodospirillales|f__Acetobacteraceae|g__Acetobacter|s__Acetobacter_okinawensis|t__SGB1191
SGB	1192	0	1	kSGB	Species	k__Bacteria|p__Proteobacteria|c__Alphaproteobacteria|o__Rhodospirillales|f__Acetobacteraceae|g__Acetobacter|s__Acetobacter_ghanensis|t__SGB1192
SGB	1193	0	2	kSGB	Species	k__Bacteria|p__Proteobacteria|c__Alphaproteobacteria|o__Rhodospirillales|f__Acetobacteraceae|g__Acetobacter|s__Acetobacter_aceti|t__SGB1193
SGB	1194	0	5	kSGB	Species	k__Bacteria|p__Proteobacteria|c__Alphaproteobacteria|o__Rhodospirillales|f__Acetobacteraceae|g__Acetobacter|s__Acetobacter_pomorum|t__SGB1194
SGB	1195	0	3	kSGB	Species	k__Bacteria|p__Proteobacteria|c__Alphaproteobacteria|o__Rhodospirillales|f__Acetobacteraceae|g__Acetobacter|s__Acetobacter_pasteurianus|t__SGB1195
SGB	1196	0	12	kSGB	Species	k__Bacteria|p__Proteobacteria|c__Alphaproteobacteria|o__Rhodospirillales|f__Acetobacteraceae|g__Acetobacter|s__Acetobacter_pasteurianus|t__SGB1196
SGB	1197	0	1	kSGB	Species	k__Bacteria|p__Proteobacteria|c__Alphaproteobacteria|o__Rhodospirillales|f__Acetobacteraceae|g__Acetobacter|s__Acetobacter_pasteurianus|t__SGB1197
SGB	1198	0	3	kSGB	Species	k__Bacteria|p__Proteobacteria|c__Alphaproteobacteria|o__Rhodospirillales|f__Acetobacteraceae|g__Acetobacter|s__Acetobacter_orleanensis|t__SGB1198
SGB	1199	0	2	kSGB	Species	k__Bacteria|p__Proteobacteria|c__Alphaproteobacteria|o__Rhodospirillales|f__Acetobacteraceae|g__Acetobacter|s__Acetobacter_persici|t__SGB1199
SGB	1200	0	3	kSGB	Species	k__Bacteria|p__Proteobacteria|c__Alphaproteobacteria|o__Rhodospirillales|f__Acetobacteraceae|g__Acetobacter|s__Acetobacter_cerevisiae|t__SGB1200
SGB	1201	0	5	kSGB	Species	k__Bacteria|p__Proteobacteria|c__Alphaproteobacteria|o__Rhodospirillales|f__Acetobacteraceae|g__Acetobacter|s__Acetobacter_malorum|t__SGB1201
SGB	1202	0	1	kSGB	Species	k__Bacteria|p__Proteobacteria|c__Alphaproteobacteria|o__Rhodospirillales|f__Acetobacteraceae|g__Acetobacter|s__Acetobacter_malorum|t__SGB1202
SGB	1203	0	3	kSGB	Species	k__Bacteria|p__Proteobacteria|c__Alphaproteobacteria|o__Rhodospirillales|f__Acetobacteraceae|g__Acetobacter|s__Acetobacter_indonesiensis|t__SGB1203
SGB	1204	0	5	kSGB	Species	k__Bacteria|p__Proteobacteria|c__Alphaproteobacteria|o__Rhodospirillales|f__Acetobacteraceae|g__Acetobacter|s__Acetobacter_tropicalis|t__SGB1204
SGB	1205	0	5	kSGB	Species	k__Bacteria|p__Proteobacteria|c__Alphaproteobacteria|o__Rhodospirillales|f__Acetobacteraceae|g__Acetobacter|s__Acetobacter_senegalensis|t__SGB1205
SGB	1206	0	1	kSGB	Species	k__Bacteria|p__Proteobacteria|c__Alphaproteobacteria|o__Rhodospirillales|f__Acetobacteraceae|g__Acetobacter|s__Acetobacter_sp_DsW_063|t__SGB1206
SGB	1209	0	1	kSGB	Species	k__Bacteria|p__Proteobacteria|c__Alphaproteobacteria|o__Sphingomonadales|f__Sphingomonadaceae|g__Sphingomonadaceae_unclassified|s__Sphingomonadaceae_bacterium_PASS1|t__SGB1209
SGB	1213	0	2	kSGB	Species	k__Bacteria|p__Proteobacteria|c__Alphaproteobacteria|o__Rhodobacterales|f__Hyphomonadaceae|g__Hyphomonadaceae_unclassified|s__Hyphomonadaceae_bacterium_UKL13_1|t__SGB1213
SGB	1214	0	1	kSGB	Species	k__Bacteria|p__Proteobacteria|c__Alphaproteobacteria|o__Alphaproteobacteria_unclassified|f__Alphaproteobacteria_unclassified|g__Alphaproteobacteria_unclassified|s__Alphaproteobacteria_bacterium_PA3|t__SGB1214
SGB	1220	0	1	kSGB	Species	k__Bacteria|p__Proteobacteria|c__Alphaproteobacteria|o__Alphaproteobacteria_unclassified|f__Alphaproteobacteria_unclassified|g__Micavibrio|s__Micavibrio_aeruginosavorus|t__SGB1220
SGB	1221	0	1	kSGB	Species	k__Bacteria|p__Proteobacteria|c__Alphaproteobacteria|o__Alphaproteobacteria_unclassified|f__Alphaproteobacteria_unclassified|g__Micavibrio|s__Micavibrio_aeruginosavorus|t__SGB1221
SGB	1226	0	2	kSGB	Species	k__Bacteria|p__Proteobacteria|c__Alphaproteobacteria|o__Rhodospirillales|f__Rhodospirillaceae|g__Rhodospirillaceae_unclassified|s__Rhodospirillaceae_bacterium|t__SGB1226
SGB	1227	0	1	kSGB	Species	k__Bacteria|p__Proteobacteria|c__Alphaproteobacteria|o__Rhodospirillales|f__Rhodospirillales_unclassified|g__Rhodospirillales_unclassified|s__Rhodospirillales_bacterium|t__SGB1227
SGB	1228	0	1	kSGB	Species	k__Bacteria|p__Proteobacteria|c__Alphaproteobacteria|o__Sneathiellales|f__Sneathiellaceae|g__Sneathiella|s__Sneathiella_sp|t__SGB1228
SGB	1229	0	1	kSGB	Species	k__Bacteria|p__Proteobacteria|c__Alphaproteobacteria|o__Sneathiellales|f__Sneathiellaceae|g__Sneathiella|s__Sneathiella_sp|t__SGB1229
SGB	1230	0	1	kSGB	Species	k__Bacteria|p__Proteobacteria|c__Alphaproteobacteria|o__Sneathiellales|f__Sneathiellaceae|g__Sneathiella|s__Sneathiella_sp|t__SGB1230
SGB	1231	0	1	kSGB	Species	k__Bacteria|p__Proteobacteria|c__Alphaproteobacteria|o__Alphaproteobacteria_unclassified|f__Alphaproteobacteria_unclassified|g__Alphaproteobacteria_unclassified|s__Alphaproteobacteria_bacterium_46_93_T64|t__SGB1231
SGB	1233	0	1	kSGB	Species	k__Bacteria|p__Proteobacteria|c__Alphaproteobacteria|o__Rhodospirillales|f__Rhodospirillaceae|g__Rhodospirillaceae_unclassified|s__Rhodospirillaceae_bacterium|t__SGB1233
SGB	1234	0	1	kSGB	Species	k__Bacteria|p__Proteobacteria|c__Alphaproteobacteria|o__Kordiimonadales|f__Kordiimonadaceae|g__Kordiimonas|s__Kordiimonas_lacus|t__SGB1234
SGB	1235	0	1	kSGB	Species	k__Bacteria|p__Proteobacteria|c__Alphaproteobacteria|o__Kordiimonadales|f__Kordiimonadales_unclassified|g__Kordiimonadales_unclassified|s__Kordiimonadales_bacterium|t__SGB1235
SGB	1236	0	1	kSGB	Species	k__Bacteria|p__Candidatus_Hydrogenedentes|c__Candidatus_Hydrogenedentes_unclassified|o__Candidatus_Hydrogenedentes_unclassified|f__Candidatus_Hydrogenedentes_unclassified|g__Candidatus_Hydrogenedentes_unclassified|s__Candidatus_Hydrogenedentes_bacterium|t__SGB1236
SGB	1238	0	1	kSGB	Species	k__Bacteria|p__Candidatus_Tectomicrobia|c__Candidatus_Tectomicrobia_unclassified|o__Candidatus_Tectomicrobia_unclassified|f__Candidatus_Tectomicrobia_unclassified|g__Candidatus_Entotheonella|s__Candidatus_Entotheonella_factor|t__SGB1238
SGB	1239	0	1	kSGB	Species	k__Bacteria|p__Candidatus_Tectomicrobia|c__Candidatus_Tectomicrobia_unclassified|o__Candidatus_Tectomicrobia_unclassified|f__Candidatus_Tectomicrobia_unclassified|g__Candidatus_Entotheonella|s__Candidatus_Entotheonella_gemina|t__SGB1239
SGB	1240	0	1	kSGB	Species	k__Bacteria|p__Bacteroidetes|c__Bacteroidia|o__Bacteroidales|f__Bacteroidaceae|g__Bacteroides|s__Bacteroides_sp_SM23_62|t__SGB1240
SGB	1241	0	1	kSGB	Species	k__Bacteria|p__Proteobacteria|c__Gammaproteobacteria|o__Pseudomonadales|f__Pseudomonadaceae|g__Pseudomonas|s__Pseudomonas_aeruginosa|t__SGB1241
SGB	1247	0	1	kSGB	Species	k__Bacteria|p__Proteobacteria|c__Alphaproteobacteria|o__Magnetococcales|f__Magnetococcales_unclassified|g__Magnetococcales_unclassified|s__Magnetococcales_bacterium|t__SGB1247
SGB	1249	0	1	kSGB	Species	k__Bacteria|p__Bacteroidetes|c__Saprospiria|o__Saprospirales|f__Lewinellaceae|g__Lewinella|s__Lewinella_nigricans|t__SGB1249
SGB	1253	0	1	kSGB	Species	k__Bacteria|p__Bacteroidetes|c__Bacteroidetes_unclassified|o__Bacteroidetes_unclassified|f__Bacteroidetes_unclassified|g__Bacteroidetes_unclassified|s__Bacteroidetes_bacterium_HLUCCA01|t__SGB1253
SGB	1254	0	2	kSGB	Species	k__Bacteria|p__Bacteroidetes|c__Flavobacteriia|o__Flavobacteriales|f__Cryomorphaceae|g__Cryomorphaceae_unclassified|s__Cryomorphaceae_bacterium_BACL18_MAG_120924_bin36|t__SGB1254
SGB	1256	0	3	kSGB	Species	k__Bacteria|p__Bacteroidetes|c__Flavobacteriia|o__Flavobacteriales|f__Cryomorphaceae|g__Cryomorphaceae_unclassified|s__Cryomorphaceae_bacterium_BACL7_MAG_121220_bin83|t__SGB1256
SGB	1257	0	1	kSGB	Species	k__Bacteria|p__Bacteroidetes|c__Flavobacteriia|o__Flavobacteriales|f__Cryomorphaceae|g__Cryomorphaceae_unclassified|s__Cryomorphaceae_bacterium_BACL23_MAG_120924_bin60|t__SGB1257
SGB	1275	0	1	kSGB	Species	k__Bacteria|p__Planctomycetes|c__Planctomycetia|o__Planctomycetales|f__Planctomycetaceae|g__Rhodopirellula|s__Rhodopirellula_sp|t__SGB1275
SGB	1276	0	2	kSGB	Species	k__Bacteria|p__Bacteroidetes|c__Sphingobacteriia|o__Sphingobacteriales|f__Sphingobacteriales_unclassified|g__Sphingobacteriales_unclassified|s__Sphingobacteriales_bacterium_BACL12_MAG_120813_bin55|t__SGB1276
SGB	1284	0	1	kSGB	Species	k__Bacteria|p__Proteobacteria|c__Deltaproteobacteria|o__Myxococcales|f__Myxococcales_unclassified|g__Myxococcales_unclassified|s__Myxococcales_bacterium|t__SGB1284
SGB	1294	0	2	kSGB	Species	k__Bacteria|p__Thermotogae|c__Thermotogae|o__Petrotogales|f__Petrotogales_unclassified|g__Marinitoga|s__Marinitoga_sp_1197|t__SGB1294
SGB	1295	0	1	kSGB	Species	k__Bacteria|p__Thermotogae|c__Thermotogae|o__Petrotogales|f__Petrotogales_unclassified|g__Marinitoga|s__Marinitoga_hydrogenitolerans|t__SGB1295
SGB	1296	0	1	kSGB	Species	k__Bacteria|p__Thermotogae|c__Thermotogae|o__Petrotogales|f__Petrotogales_unclassified|g__Marinitoga|s__Marinitoga_piezophila|t__SGB1296
SGB	1297	0	1	kSGB	Species	k__Bacteria|p__Thermotogae|c__Thermotogae|o__Petrotogales|f__Petrotogales_unclassified|g__Geotoga|s__Geotoga_petraea|t__SGB1297
SGB	1298	0	1	kSGB	Species	k__Bacteria|p__Thermotogae|c__Thermotogae|o__Mesoaciditogales|f__Mesoaciditogaceae|g__Mesoaciditoga|s__Mesoaciditoga_sp|t__SGB1298
SGB	1303	10	0	uSGB	Other	k__Bacteria|p__Bacteroidetes|c__CFGB484|o__OFGB484|f__FGB484|g__GGB1010|s__GGB1010_SGB1303|t__SGB1303
SGB	1308	0	1	kSGB	Species	k__Bacteria|p__Candidatus_Omnitrophica|c__Candidatus_Omnitrophica_unclassified|o__Candidatus_Omnitrophica_unclassified|f__Candidatus_Omnitrophica_unclassified|g__Candidatus_Omnitrophica_unclassified|s__Omnitrophica_bacterium_OLB16|t__SGB1308
SGB	1309	0	1	kSGB	Species	k__Bacteria|p__Acidobacteria|c__Acidobacteria_unclassified|o__Acidobacteria_unclassified|f__Acidobacteria_unclassified|g__Acidobacteria_unclassified|s__Acidobacteria_bacterium|t__SGB1309
SGB	1310	0	1	kSGB	Species	k__Bacteria|p__Bacteroidetes|c__Bacteroidetes_unclassified|o__Bacteroidetes_unclassified|f__Bacteroidetes_unclassified|g__Bacteroidetes_unclassified|s__Bacteroidetes_bacterium_4572_117|t__SGB1310
SGB	1311	0	1	kSGB	Species	k__Bacteria|p__Bacteroidetes|c__Bacteroidetes_unclassified|o__Bacteroidetes_unclassified|f__Bacteroidetes_unclassified|g__Bacteroidetes_unclassified|s__Bacteroidetes_bacterium_4484_276|t__SGB1311
SGB	1312	0	1	kSGB	Species	k__Bacteria|p__Bacteroidetes|c__Bacteroidetes_unclassified|o__Bacteroidetes_unclassified|f__Bacteroidetes_unclassified|g__Bacteroidetes_unclassified|s__Bacteroidetes_bacterium_4484_249|t__SGB1312
SGB	1314	2	0	uSGB	Other	k__Bacteria|p__Firmicutes|c__CFGB494|o__OFGB494|f__FGB494|g__GGB1021|s__GGB1021_SGB1314|t__SGB1314
SGB	1315	7	0	uSGB	Other	k__Bacteria|p__Bacteroidetes|c__CFGB494|o__OFGB494|f__FGB494|g__GGB1022|s__GGB1022_SGB1315|t__SGB1315
SGB	1316	1	0	uSGB	Other	k__Bacteria|p__Bacteroidetes|c__CFGB494|o__OFGB494|f__FGB494|g__GGB1022|s__GGB1022_SGB1316|t__SGB1316
SGB	1317	1	0	uSGB	Other	k__Bacteria|p__Bacteroidetes|c__CFGB494|o__OFGB494|f__FGB494|g__GGB1023|s__GGB1023_SGB1317|t__SGB1317
SGB	1318	1	0	uSGB	Other	k__Bacteria|p__Bacteroidetes|c__CFGB495|o__OFGB495|f__FGB495|g__GGB1024|s__GGB1024_SGB1318|t__SGB1318
SGB	1319	9	0	uSGB	Genus	k__Bacteria|p__Bacteroidetes|c__Bacteroidia|o__Bacteroidales|f__Bacteroidaceae|g__Bacteroides|s__Bacteroides_SGB1319|t__SGB1319
SGB	1320	6	1	kSGB	Species	k__Bacteria|p__Bacteroidetes|c__Bacteroidia|o__Bacteroidales|f__Bacteroidaceae|g__Bacteroides|s__Candidatus_Bacteroides_periocalifornicus|t__SGB1320
SGB	1321	7	0	uSGB	Other	k__Bacteria|p__Bacteroidetes|c__CFGB497|o__OFGB497|f__FGB497|g__GGB1026|s__GGB1026_SGB1321|t__SGB1321
SGB	1322	1	0	uSGB	Other	k__Bacteria|p__Bacteroidetes|c__CFGB498|o__OFGB498|f__FGB498|g__GGB1027|s__GGB1027_SGB1322|t__SGB1322
SGB	1332	4	0	uSGB	Other	k__Bacteria|p__Bacteroidetes|c__CFGB503|o__OFGB503|f__FGB503|g__GGB1035|s__GGB1035_SGB1332|t__SGB1332
SGB	1333	15	0	uSGB	Other	k__Bacteria|p__Bacteroidetes|c__CFGB503|o__OFGB503|f__FGB503|g__GGB1035|s__GGB1035_SGB1333|t__SGB1333
SGB	1341	35	1	kSGB	Species	k__Bacteria|p__Bacteroidetes|c__Bacteroidetes_unclassified|o__Bacteroidetes_unclassified|f__Bacteroidetes_unclassified|g__Bacteroidetes_unclassified|s__Bacteroidetes_oral_taxon_274|t__SGB1341
SGB	1342	2	0	uSGB	Genus	k__Bacteria|p__Bacteroidetes|c__Bacteroidetes_unclassified|o__Bacteroidetes_unclassified|f__Bacteroidetes_unclassified|g__Bacteroidetes_unclassified|s__Bacteroidetes_unclassified_SGB1342|t__SGB1342
SGB	1343	17	0	uSGB	Genus	k__Bacteria|p__Bacteroidetes|c__Bacteroidetes_unclassified|o__Bacteroidetes_unclassified|f__Bacteroidetes_unclassified|g__Bacteroidetes_unclassified|s__Bacteroidetes_unclassified_SGB1343|t__SGB1343
SGB	1344	0	1	kSGB	Species	k__Bacteria|p__Bacteroidetes|c__Bacteroidia|o__Bacteroidales|f__Porphyromonadaceae|g__Porphyromonadaceae_unclassified|s__Porphyromonadaceae_bacterium_COT_184_OH4590|t__SGB1344
SGB	1346	0	1	kSGB	Species	k__Bacteria|p__Bacteroidetes|c__Bacteroidia|o__Bacteroidales|f__Paludibacteraceae|g__Paludibacter|s__Paludibacter_propionicigenes|t__SGB1346
SGB	1348	0	1	kSGB	Species	k__Bacteria|p__Bacteroidetes|c__Bacteroidia|o__Bacteroidales|f__Paludibacteraceae|g__Paludibacter|s__Paludibacter_jiangxiensis|t__SGB1348
SGB	1370	11	0	uSGB	Other	k__Bacteria|p__Bacteroidetes|c__CFGB511|o__OFGB511|f__FGB511|g__GGB1066|s__GGB1066_SGB1370|t__SGB1370
SGB	1371	2	0	uSGB	Other	k__Bacteria|p__Bacteroidetes|c__CFGB511|o__OFGB511|f__FGB511|g__GGB1067|s__GGB1067_SGB1371|t__SGB1371
SGB	1383	0	1	kSGB	Species	k__Bacteria|p__Proteobacteria|c__Proteobacteria_unclassified|o__Proteobacteria_unclassified|f__Proteobacteria_unclassified|g__Proteobacteria_unclassified|s__Proteobacteria_bacterium|t__SGB1383
SGB	1386	0	1	kSGB	Species	k__Bacteria|p__Bacteroidetes|c__Bacteroidia|o__Bacteroidales|f__Bacteroidaceae|g__Bacteroides|s__Bacteroides_coprosuis|t__SGB1386
SGB	1395	17	0	uSGB	Other	k__Bacteria|p__Bacteroidetes|c__CFGB524|o__OFGB524|f__FGB524|g__GGB1088|s__GGB1088_SGB1395|t__SGB1395
SGB	1397	4	0	uSGB	Other	k__Bacteria|p__Bacteroidetes|c__CFGB524|o__OFGB524|f__FGB524|g__GGB1088|s__GGB1088_SGB1397|t__SGB1397
SGB	1398	1	0	uSGB	Other	k__Bacteria|p__Bacteroidetes|c__CFGB524|o__OFGB524|f__FGB524|g__GGB1088|s__GGB1088_SGB1398|t__SGB1398
SGB	1404	76	0	uSGB	Other	k__Bacteria|p__Bacteroidetes|c__CFGB529|o__OFGB529|f__FGB529|g__GGB1093|s__GGB1093_SGB1404|t__SGB1404
SGB	1407	4	0	uSGB	Other	k__Bacteria|p__Bacteroidetes|c__CFGB530|o__OFGB530|f__FGB530|g__GGB1095|s__GGB1095_SGB1407|t__SGB1407
SGB	1408	31	0	uSGB	Other	k__Bacteria|p__Bacteroidetes|c__CFGB530|o__OFGB530|f__FGB530|g__GGB1096|s__GGB1096_SGB1408|t__SGB1408
SGB	1410	3	0	uSGB	Genus	k__Bacteria|p__Bacteroidetes|c__Bacteroidia|o__Bacteroidales|f__Prevotellaceae|g__Alloprevotella|s__Alloprevotella_SGB1410|t__SGB1410
SGB	1411	10	1	kSGB	Species	k__Bacteria|p__Bacteroidetes|c__Bacteroidia|o__Bacteroidales|f__Prevotellaceae|g__Alloprevotella|s__Alloprevotella_tannerae|t__SGB1411
SGB	1415	7	0	uSGB	Other	k__Bacteria|p__Bacteroidetes|c__CFGB535|o__OFGB535|f__FGB535|g__GGB1101|s__GGB1101_SGB1415|t__SGB1415
SGB	1416	10	0	uSGB	Other	k__Bacteria|p__Bacteroidetes|c__CFGB536|o__OFGB536|f__FGB536|g__GGB1102|s__GGB1102_SGB1416|t__SGB1416
SGB	1423	2	1	kSGB	Species	k__Bacteria|p__Bacteroidetes|c__Bacteroidia|o__Bacteroidales|f__Prevotellaceae|g__Prevotella|s__Prevotella_sp_CAG_617|t__SGB1423
SGB	1424	22	1	kSGB	Species	k__Bacteria|p__Bacteroidetes|c__Bacteroidia|o__Bacteroidales|f__Prevotellaceae|g__Prevotella|s__Prevotella_sp_CAG_755|t__SGB1424
SGB	1425	1	0	uSGB	Family	k__Bacteria|p__Bacteroidetes|c__Bacteroidia|o__Bacteroidales|f__Prevotellaceae|g__GGB1111|s__GGB1111_SGB1425|t__SGB1425
SGB	1426	1	0	uSGB	Family	k__Bacteria|p__Bacteroidetes|c__Bacteroidia|o__Bacteroidales|f__Prevotellaceae|g__GGB1112|s__GGB1112_SGB1426|t__SGB1426
SGB	1427	1	0	uSGB	Family	k__Bacteria|p__Bacteroidetes|c__Bacteroidia|o__Bacteroidales|f__Prevotellaceae|g__GGB1113|s__GGB1113_SGB1427|t__SGB1427
SGB	1428	1	0	uSGB	Family	k__Bacteria|p__Bacteroidetes|c__Bacteroidia|o__Bacteroidales|f__Prevotellaceae|g__GGB1114|s__GGB1114_SGB1428|t__SGB1428
SGB	1429	18	1	kSGB	Species	k__Bacteria|p__Bacteroidetes|c__Bacteroidia|o__Bacteroidales|f__Bacteroidaceae|g__Bacteroides|s__Bacteroides_sp_CAG_462|t__SGB1429
SGB	1430	7	0	uSGB	Family	k__Bacteria|p__Bacteroidetes|c__Bacteroidia|o__Bacteroidales|f__Bacteroidaceae|g__GGB1116|s__GGB1116_SGB1430|t__SGB1430
SGB	1431	1	0	uSGB	Family	k__Bacteria|p__Bacteroidetes|c__Bacteroidia|o__Bacteroidales|f__Bacteroidaceae|g__GGB1117|s__GGB1117_SGB1431|t__SGB1431
SGB	1432	0	1	kSGB	Species	k__Bacteria|p__Bacteroidetes|c__Bacteroidia|o__Bacteroidales|f__Tannerellaceae|g__Parabacteroides|s__Parabacteroides_sp_An277|t__SGB1432
SGB	1433	1	0	uSGB	Family	k__Bacteria|p__Bacteroidetes|c__Bacteroidia|o__Bacteroidales|f__Tannerellaceae|g__GGB1119|s__GGB1119_SGB1433|t__SGB1433
SGB	1437	66	0	uSGB	Other	k__Bacteria|p__Bacteroidetes|c__CFGB544|o__OFGB544|f__FGB544|g__GGB1123|s__GGB1123_SGB1437|t__SGB1437
SGB	1454	15	1	kSGB	Species	k__Bacteria|p__Bacteroidetes|c__Bacteroidia|o__Bacteroidales|f__Prevotellaceae|g__Prevotella|s__Prevotella_saccharolytica|t__SGB1454
SGB	1455	4	0	uSGB	Family	k__Bacteria|p__Bacteroidetes|c__Bacteroidia|o__Bacteroidales|f__Prevotellaceae|g__GGB1138|s__GGB1138_SGB1455|t__SGB1455
SGB	1456	40	0	uSGB	Family	k__Bacteria|p__Bacteroidetes|c__Bacteroidia|o__Bacteroidales|f__Prevotellaceae|g__GGB1139|s__GGB1139_SGB1456|t__SGB1456
SGB	1457	35	2	kSGB	Species	k__Bacteria|p__Bacteroidetes|c__Bacteroidia|o__Bacteroidales|f__Prevotellaceae|g__Prevotella|s__Prevotella_sp_oral_taxon_472|t__SGB1457
SGB	1458	15	2	kSGB	Species	k__Bacteria|p__Bacteroidetes|c__Bacteroidia|o__Bacteroidales|f__Prevotellaceae|g__Prevotella|s__Prevotella_sp_oral_taxon_317|t__SGB1458
SGB	1459	14	0	uSGB	Genus	k__Bacteria|p__Bacteroidetes|c__Bacteroidia|o__Bacteroidales|f__Prevotellaceae|g__Prevotella|s__Prevotella_SGB1459|t__SGB1459
SGB	1460	1	0	uSGB	Genus	k__Bacteria|p__Bacteroidetes|c__Bacteroidia|o__Bacteroidales|f__Prevotellaceae|g__Prevotella|s__Prevotella_SGB1460|t__SGB1460
SGB	1461	1	0	uSGB	Genus	k__Bacteria|p__Bacteroidetes|c__Bacteroidia|o__Bacteroidales|f__Prevotellaceae|g__Prevotella|s__Prevotella_SGB1461|t__SGB1461
SGB	1462	1	0	uSGB	Family	k__Bacteria|p__Bacteroidetes|c__Bacteroidia|o__Bacteroidales|f__Prevotellaceae|g__GGB1141|s__GGB1141_SGB1462|t__SGB1462
SGB	1463	3	0	uSGB	Genus	k__Bacteria|p__Bacteroidetes|c__Bacteroidia|o__Bacteroidales|f__Prevotellaceae|g__Alloprevotella|s__Alloprevotella_SGB1463|t__SGB1463
SGB	1464	14	1	kSGB	Species	k__Bacteria|p__Bacteroidetes|c__Bacteroidia|o__Bacteroidales|f__Prevotellaceae|g__Alloprevotella|s__Prevotella_sp_oral_taxon_473|t__SGB1464
SGB	1465	21	0	uSGB	Genus	k__Bacteria|p__Bacteroidetes|c__Bacteroidia|o__Bacteroidales|f__Prevotellaceae|g__Alloprevotella|s__Alloprevotella_SGB1465|t__SGB1465
SGB	1466	13	0	uSGB	Genus	k__Bacteria|p__Bacteroidetes|c__Bacteroidia|o__Bacteroidales|f__Prevotellaceae|g__Alloprevotella|s__Alloprevotella_SGB1466|t__SGB1466
SGB	1467	2	0	uSGB	Family	k__Bacteria|p__Bacteroidetes|c__Bacteroidia|o__Bacteroidales|f__Prevotellaceae|g__GGB1143|s__GGB1143_SGB1467|t__SGB1467
SGB	1468	66	0	uSGB	Family	k__Bacteria|p__Bacteroidetes|c__Bacteroidia|o__Bacteroidales|f__Prevotellaceae|g__GGB1144|s__GGB1144_SGB1468|t__SGB1468
SGB	1469	29	0	uSGB	Family	k__Bacteria|p__Bacteroidetes|c__Bacteroidia|o__Bacteroidales|f__Prevotellaceae|g__GGB1144|s__GGB1144_SGB1469|t__SGB1469
SGB	1470	1	0	uSGB	Family	k__Bacteria|p__Bacteroidetes|c__Bacteroidia|o__Bacteroidales|f__Prevotellaceae|g__GGB1144|s__GGB1144_SGB1470|t__SGB1470
SGB	1471	3	0	uSGB	Family	k__Bacteria|p__Bacteroidetes|c__Bacteroidia|o__Bacteroidales|f__Prevotellaceae|g__GGB1145|s__GGB1145_SGB1471|t__SGB1471
SGB	1472	172	0	uSGB	Family	k__Bacteria|p__Bacteroidetes|c__Bacteroidia|o__Bacteroidales|f__Prevotellaceae|g__GGB1146|s__GGB1146_SGB1472|t__SGB1472
SGB	1473	12	0	uSGB	Family	k__Bacteria|p__Bacteroidetes|c__Bacteroidia|o__Bacteroidales|f__Prevotellaceae|g__GGB1147|s__GGB1147_SGB1473|t__SGB1473
SGB	1474	41	0	uSGB	Family	k__Bacteria|p__Bacteroidetes|c__Bacteroidia|o__Bacteroidales|f__Prevotellaceae|g__GGB1147|s__GGB1147_SGB1474|t__SGB1474
SGB	1475	125	0	uSGB	Family	k__Bacteria|p__Bacteroidetes|c__Bacteroidia|o__Bacteroidales|f__Prevotellaceae|g__GGB1148|s__GGB1148_SGB1475|t__SGB1475
SGB	1476	1	0	uSGB	Family	k__Bacteria|p__Bacteroidetes|c__Bacteroidia|o__Bacteroidales|f__Prevotellaceae|g__GGB1149|s__GGB1149_SGB1476|t__SGB1476
SGB	1477	128	1	kSGB	Species	k__Bacteria|p__Bacteroidetes|c__Bacteroidia|o__Bacteroidales|f__Prevotellaceae|g__Prevotella|s__Prevotella_sp_CAG_5226|t__SGB1477
SGB	1478	19	0	uSGB	Family	k__Bacteria|p__Bacteroidetes|c__Bacteroidia|o__Bacteroidales|f__Prevotellaceae|g__GGB1151|s__GGB1151_SGB1478|t__SGB1478
SGB	1481	22	1	kSGB	Species	k__Bacteria|p__Bacteroidetes|c__Bacteroidia|o__Bacteroidales|f__Prevotellaceae|g__Prevotella|s__Prevotella_sp_CAG_891|t__SGB1481
SGB	1482	4	0	uSGB	Family	k__Bacteria|p__Bacteroidetes|c__Bacteroidia|o__Bacteroidales|f__Prevotellaceae|g__GGB1154|s__GGB1154_SGB1482|t__SGB1482
SGB	1483	3	0	uSGB	Genus	k__Bacteria|p__Bacteroidetes|c__Bacteroidia|o__Bacteroidales|f__Prevotellaceae|g__Alloprevotella|s__Alloprevotella_SGB1483|t__SGB1483
SGB	1484	2	0	uSGB	Genus	k__Bacteria|p__Bacteroidetes|c__Bacteroidia|o__Bacteroidales|f__Prevotellaceae|g__Alloprevotella|s__Alloprevotella_SGB1484|t__SGB1484
SGB	1485	0	1	kSGB	Species	k__Bacteria|p__Bacteroidetes|c__Bacteroidia|o__Bacteroidales|f__Prevotellaceae|g__Alloprevotella|s__Alloprevotella_rava|t__SGB1485
SGB	1487	3	0	uSGB	Other	k__Bacteria|p__Bacteroidetes|c__CFGB556|o__OFGB556|f__FGB556|g__GGB1157|s__GGB1157_SGB1487|t__SGB1487
SGB	1488	12	0	uSGB	Other	k__Bacteria|p__Bacteroidetes|c__CFGB557|o__OFGB557|f__FGB557|g__GGB1158|s__GGB1158_SGB1488|t__SGB1488
SGB	1489	2	0	uSGB	Other	k__Bacteria|p__Bacteroidetes|c__CFGB557|o__OFGB557|f__FGB557|g__GGB1158|s__GGB1158_SGB1489|t__SGB1489
SGB	1493	0	1	kSGB	Species	k__Bacteria|p__Bacteroidetes|c__Bacteroidia|o__Bacteroidales|f__Bacteroidales_unclassified|g__Bacteroidales_unclassified|s__Bacteroidales_bacterium_KHT7|t__SGB1493
SGB	1497	1	0	uSGB	Other	k__Bacteria|p__Bacteroidetes|c__CFGB561|o__OFGB561|f__FGB561|g__GGB1166|s__GGB1166_SGB1497|t__SGB1497
SGB	1500	0	5	kSGB	Species	k__Bacteria|p__Bacteroidetes|c__Bacteroidia|o__Bacteroidales|f__Prevotellaceae|g__Prevotella|s__Prevotella_bryantii|t__SGB1500
SGB	1501	1	1	kSGB	Species	k__Bacteria|p__Bacteroidetes|c__Bacteroidia|o__Bacteroidales|f__Prevotellaceae|g__Prevotella|s__Prevotella_sp_S7_1_8|t__SGB1501
SGB	1502	11	0	uSGB	Genus	k__Bacteria|p__Bacteroidetes|c__Bacteroidia|o__Bacteroidales|f__Prevotellaceae|g__Prevotella|s__Prevotella_SGB1502|t__SGB1502
SGB	1503	4	0	uSGB	Genus	k__Bacteria|p__Bacteroidetes|c__Bacteroidia|o__Bacteroidales|f__Prevotellaceae|g__Prevotella|s__Prevotella_SGB1503|t__SGB1503
SGB	1504	22	1	kSGB	Species	k__Bacteria|p__Bacteroidetes|c__Bacteroidia|o__Bacteroidales|f__Prevotellaceae|g__Prevotella|s__Prevotella_corporis|t__SGB1504
SGB	1505	1	1	kSGB	Species	k__Bacteria|p__Bacteroidetes|c__Bacteroidia|o__Bacteroidales|f__Prevotellaceae|g__Prevotella|s__Prevotella_bergensis|t__SGB1505
SGB	1506	0	1	kSGB	Species	k__Bacteria|p__Bacteroidetes|c__Bacteroidia|o__Bacteroidales|f__Bacteroidales_unclassified|g__Bacteroidales_unclassified|s__Bacteroidales_bacterium_KA00344|t__SGB1506
SGB	1507	24	4	kSGB	Species	k__Bacteria|p__Bacteroidetes|c__Bacteroidia|o__Bacteroidales|f__Prevotellaceae|g__Prevotella|s__Prevotella_timonensis|t__SGB1507
SGB	1512	1	0	uSGB	Genus	k__Bacteria|p__Bacteroidetes|c__Bacteroidia|o__Bacteroidales|f__Prevotellaceae|g__Prevotella|s__Prevotella_SGB1512|t__SGB1512
SGB	1513	1	0	uSGB	Genus	k__Bacteria|p__Bacteroidetes|c__Bacteroidia|o__Bacteroidales|f__Prevotellaceae|g__Prevotella|s__Prevotella_SGB1513|t__SGB1513
SGB	1514	1	3	kSGB	Species	k__Bacteria|p__Bacteroidetes|c__Bacteroidia|o__Bacteroidales|f__Prevotellaceae|g__Prevotella|s__Prevotella_buccalis|t__SGB1514
SGB	1515	3	0	uSGB	Genus	k__Bacteria|p__Bacteroidetes|c__Bacteroidia|o__Bacteroidales|f__Prevotellaceae|g__Prevotella|s__Prevotella_SGB1515|t__SGB1515
SGB	1516	7	0	uSGB	Genus	k__Bacteria|p__Bacteroidetes|c__Bacteroidia|o__Bacteroidales|f__Prevotellaceae|g__Prevotella|s__Prevotella_SGB1516|t__SGB1516
SGB	1517	19	2	kSGB	Species	k__Bacteria|p__Bacteroidetes|c__Bacteroidia|o__Bacteroidales|f__Prevotellaceae|g__Prevotella|s__Prevotella_buccalis|t__SGB1517
SGB	1518	1	0	uSGB	Genus	k__Bacteria|p__Bacteroidetes|c__Bacteroidia|o__Bacteroidales|f__Prevotellaceae|g__Prevotella|s__Prevotella_SGB1518|t__SGB1518
SGB	1519	1	0	uSGB	Genus	k__Bacteria|p__Bacteroidetes|c__Bacteroidia|o__Bacteroidales|f__Prevotellaceae|g__Prevotella|s__Prevotella_SGB1519|t__SGB1519
SGB	1520	8	2	kSGB	Species	k__Bacteria|p__Bacteroidetes|c__Bacteroidia|o__Bacteroidales|f__Prevotellaceae|g__Prevotella|s__Prevotella_oulorum|t__SGB1520
SGB	1521	15	0	uSGB	Genus	k__Bacteria|p__Bacteroidetes|c__Bacteroidia|o__Bacteroidales|f__Prevotellaceae|g__Prevotella|s__Prevotella_SGB1521|t__SGB1521
SGB	1522	64	2	kSGB	Species	k__Bacteria|p__Bacteroidetes|c__Bacteroidia|o__Bacteroidales|f__Prevotellaceae|g__Prevotella|s__Prevotella_salivae|t__SGB1522
SGB	1524	5	1	kSGB	Species	k__Bacteria|p__Bacteroidetes|c__Bacteroidia|o__Bacteroidales|f__Prevotellaceae|g__Prevotella|s__Prevotella_maculosa|t__SGB1524
SGB	1525	34	5	kSGB	Species	k__Bacteria|p__Bacteroidetes|c__Bacteroidia|o__Bacteroidales|f__Prevotellaceae|g__Prevotella|s__Prevotella_oris|t__SGB1525
SGB	1526	14	1	kSGB	Species	k__Bacteria|p__Bacteroidetes|c__Bacteroidia|o__Bacteroidales|f__Prevotellaceae|g__Prevotella|s__Prevotella_pleuritidis|t__SGB1526
SGB	1527	0	1	kSGB	Species	k__Bacteria|p__Bacteroidetes|c__Bacteroidia|o__Bacteroidales|f__Prevotellaceae|g__Prevotella|s__Prevotella_enoeca|t__SGB1527
SGB	1528	1	3	kSGB	Species	k__Bacteria|p__Bacteroidetes|c__Bacteroidia|o__Bacteroidales|f__Prevotellaceae|g__Prevotella|s__Prevotella_oralis|t__SGB1528
SGB	1529	0	2	kSGB	Species	k__Bacteria|p__Bacteroidetes|c__Bacteroidia|o__Bacteroidales|f__Prevotellaceae|g__Prevotella|s__Prevotella_sp_kh1p2|t__SGB1529
SGB	1530	0	1	kSGB	Species	k__Bacteria|p__Bacteroidetes|c__Bacteroidia|o__Bacteroidales|f__Prevotellaceae|g__Prevotella|s__Prevotella_sp_KH2C16|t__SGB1530
SGB	1531	33	3	kSGB	Species	k__Bacteria|p__Bacteroidetes|c__Bacteroidia|o__Bacteroidales|f__Prevotellaceae|g__Prevotella|s__Prevotella_buccae|t__SGB1531
SGB	1532	0	2	kSGB	Species	k__Bacteria|p__Bacteroidetes|c__Bacteroidia|o__Bacteroidales|f__Prevotellaceae|g__Prevotella|s__Prevotella_dentalis|t__SGB1532
SGB	1533	0	1	kSGB	Species	k__Bacteria|p__Bacteroidetes|c__Bacteroidia|o__Bacteroidales|f__Prevotellaceae|g__Prevotella|s__Prevotella_baroniae|t__SGB1533
SGB	1534	3	0	uSGB	Family	k__Bacteria|p__Bacteroidetes|c__Bacteroidia|o__Bacteroidales|f__Prevotellaceae|g__GGB1186|s__GGB1186_SGB1534|t__SGB1534
SGB	1535	2	1	kSGB	Species	k__Bacteria|p__Bacteroidetes|c__Bacteroidia|o__Bacteroidales|f__Prevotellaceae|g__Prevotella|s__Prevotella_sp_oral_taxon_299|t__SGB1535
SGB	1536	81	0	uSGB	Genus	k__Bacteria|p__Bacteroidetes|c__Bacteroidia|o__Bacteroidales|f__Prevotellaceae|g__Prevotella|s__Prevotella_SGB1536|t__SGB1536
SGB	1538	2	0	uSGB	Family	k__Bacteria|p__Bacteroidetes|c__Bacteroidia|o__Bacteroidales|f__Prevotellaceae|g__GGB1188|s__GGB1188_SGB1538|t__SGB1538
SGB	1539	1	1	kSGB	Species	k__Bacteria|p__Bacteroidetes|c__Bacteroidia|o__Bacteroidales|f__Prevotellaceae|g__Prevotella|s__Prevotella_multiformis|t__SGB1539
SGB	1540	14	3	kSGB	Species	k__Bacteria|p__Bacteroidetes|c__Bacteroidia|o__Bacteroidales|f__Prevotellaceae|g__Prevotella|s__Prevotella_denticola|t__SGB1540
SGB	1541	3	1	kSGB	Species	k__Bacteria|p__Bacteroidetes|c__Bacteroidia|o__Bacteroidales|f__Prevotellaceae|g__Prevotella|s__Prevotella_veroralis|t__SGB1541
SGB	1542	28	1	kSGB	Species	k__Bacteria|p__Bacteroidetes|c__Bacteroidia|o__Bacteroidales|f__Prevotellaceae|g__Prevotella|s__Prevotella_sp_oral_taxon_306|t__SGB1542
SGB	1543	72	2	kSGB	Species	k__Bacteria|p__Bacteroidetes|c__Bacteroidia|o__Bacteroidales|f__Prevotellaceae|g__Prevotella|s__Prevotella_histicola|t__SGB1543
SGB	1544	1	2	kSGB	Species	k__Bacteria|p__Bacteroidetes|c__Bacteroidia|o__Bacteroidales|f__Prevotellaceae|g__Prevotella|s__Prevotella_scopos|t__SGB1544
SGB	1545	17	3	kSGB	Species	k__Bacteria|p__Bacteroidetes|c__Bacteroidia|o__Bacteroidales|f__Prevotellaceae|g__Prevotella|s__Prevotella_jejuni|t__SGB1545
SGB	1546	1	0	uSGB	Genus	k__Bacteria|p__Bacteroidetes|c__Bacteroidia|o__Bacteroidales|f__Prevotellaceae|g__Prevotella|s__Prevotella_SGB1546|t__SGB1546
SGB	1547	1	1	kSGB	Species	k__Bacteria|p__Bacteroidetes|c__Bacteroidia|o__Bacteroidales|f__Prevotellaceae|g__Prevotella|s__Prevotella_sp_F0091|t__SGB1547
SGB	1548	2	0	uSGB	Genus	k__Bacteria|p__Bacteroidetes|c__Bacteroidia|o__Bacteroidales|f__Prevotellaceae|g__Prevotella|s__Prevotella_SGB1548|t__SGB1548
SGB	1549	3	0	uSGB	Genus	k__Bacteria|p__Bacteroidetes|c__Bacteroidia|o__Bacteroidales|f__Prevotellaceae|g__Prevotella|s__Prevotella_SGB1549|t__SGB1549
SGB	1550	2	0	uSGB	Genus	k__Bacteria|p__Bacteroidetes|c__Bacteroidia|o__Bacteroidales|f__Prevotellaceae|g__Prevotella|s__Prevotella_SGB1550|t__SGB1550
SGB	1551	4	0	uSGB	Genus	k__Bacteria|p__Bacteroidetes|c__Bacteroidia|o__Bacteroidales|f__Prevotellaceae|g__Prevotella|s__Prevotella_SGB1551|t__SGB1551
SGB	1552	1	0	uSGB	Genus	k__Bacteria|p__Bacteroidetes|c__Bacteroidia|o__Bacteroidales|f__Prevotellaceae|g__Prevotella|s__Prevotella_SGB1552|t__SGB1552
SGB	1553	1	0	uSGB	Genus	k__Bacteria|p__Bacteroidetes|c__Bacteroidia|o__Bacteroidales|f__Prevotellaceae|g__Prevotella|s__Prevotella_SGB1553|t__SGB1553
SGB	1554	169	5	kSGB	Species	k__Bacteria|p__Bacteroidetes|c__Bacteroidia|o__Bacteroidales|f__Prevotellaceae|g__Prevotella|s__Prevotella_melaninogenica|t__SGB1554
SGB	1556	0	1	kSGB	Species	k__Bacteria|p__Bacteroidetes|c__Bacteroidia|o__Bacteroidales|f__Prevotellaceae|g__Prevotella|s__Prevotella_fusca|t__SGB1556
SGB	1557	51	7	kSGB	Species	k__Bacteria|p__Bacteroidetes|c__Bacteroidia|o__Bacteroidales|f__Prevotellaceae|g__Prevotella|s__Prevotella_bivia|t__SGB1557
SGB	1558	6	3	kSGB	Species	k__Bacteria|p__Bacteroidetes|c__Bacteroidia|o__Bacteroidales|f__Prevotellaceae|g__Prevotella|s__Prevotella_amnii|t__SGB1558
SGB	1559	20	3	kSGB	Species	k__Bacteria|p__Bacteroidetes|c__Bacteroidia|o__Bacteroidales|f__Prevotellaceae|g__Prevotella|s__Prevotella_disiens|t__SGB1559
SGB	1560	31	26	kSGB	Species	k__Bacteria|p__Bacteroidetes|c__Bacteroidia|o__Bacteroidales|f__Prevotellaceae|g__Prevotella|s__Prevotella_intermedia|t__SGB1560
SGB	1561	39	4	kSGB	Species	k__Bacteria|p__Bacteroidetes|c__Bacteroidia|o__Bacteroidales|f__Prevotellaceae|g__Prevotella|s__Prevotella_nigrescens|t__SGB1561
SGB	1563	10	0	uSGB	Family	k__Bacteria|p__Bacteroidetes|c__Bacteroidia|o__Bacteroidales|f__Prevotellaceae|g__GGB1198|s__GGB1198_SGB1563|t__SGB1563
SGB	1564	120	1	kSGB	Species	k__Bacteria|p__Bacteroidetes|c__Bacteroidia|o__Bacteroidales|f__Prevotellaceae|g__Prevotella|s__Prevotella_pallens|t__SGB1564
SGB	1565	4	1	kSGB	Species	k__Bacteria|p__Bacteroidetes|c__Bacteroidia|o__Bacteroidales|f__Prevotellaceae|g__Prevotella|s__Prevotella_micans|t__SGB1565
SGB	1566	3	0	uSGB	Other	k__Bacteria|p__Bacteroidetes|c__CFGB570|o__OFGB570|f__FGB570|g__GGB1201|s__GGB1201_SGB1566|t__SGB1566
SGB	1567	5	0	uSGB	Other	k__Bacteria|p__Bacteroidetes|c__CFGB570|o__OFGB570|f__FGB570|g__GGB1202|s__GGB1202_SGB1567|t__SGB1567
SGB	1568	26	0	uSGB	Other	k__Bacteria|p__Bacteroidetes|c__CFGB570|o__OFGB570|f__FGB570|g__GGB1203|s__GGB1203_SGB1568|t__SGB1568
SGB	1577	3	0	uSGB	Other	k__Bacteria|p__Bacteroidetes|c__CFGB574|o__OFGB574|f__FGB574|g__GGB1211|s__GGB1211_SGB1577|t__SGB1577
SGB	1579	3	0	uSGB	Other	k__Bacteria|p__Bacteroidetes|c__CFGB575|o__OFGB575|f__FGB575|g__GGB1213|s__GGB1213_SGB1579|t__SGB1579
SGB	1580	2	0	uSGB	Other	k__Bacteria|p__Bacteroidetes|c__CFGB576|o__OFGB576|f__FGB576|g__GGB1214|s__GGB1214_SGB1580|t__SGB1580
SGB	1581	11	0	uSGB	Other	k__Bacteria|p__Bacteroidetes|c__CFGB576|o__OFGB576|f__FGB576|g__GGB1215|s__GGB1215_SGB1581|t__SGB1581
SGB	1583	3	0	uSGB	Family	k__Bacteria|p__Bacteroidetes|c__Bacteroidia|o__Bacteroidales|f__Prevotellaceae|g__GGB1217|s__GGB1217_SGB1583|t__SGB1583
SGB	1584	1	0	uSGB	Family	k__Bacteria|p__Bacteroidetes|c__Bacteroidia|o__Bacteroidales|f__Prevotellaceae|g__GGB1217|s__GGB1217_SGB1584|t__SGB1584
SGB	1585	58	1	kSGB	Species	k__Bacteria|p__Bacteroidetes|c__Bacteroidia|o__Bacteroidales|f__Prevotellaceae|g__Prevotella|s__Prevotella_sp_CAG_487|t__SGB1585
SGB	1586	8	0	uSGB	Family	k__Bacteria|p__Bacteroidetes|c__Bacteroidia|o__Bacteroidales|f__Prevotellaceae|g__GGB1219|s__GGB1219_SGB1586|t__SGB1586
SGB	1587	37	0	uSGB	Family	k__Bacteria|p__Bacteroidetes|c__Bacteroidia|o__Bacteroidales|f__Prevotellaceae|g__GGB1219|s__GGB1219_SGB1587|t__SGB1587
SGB	1588	121	2	kSGB	Species	k__Bacteria|p__Bacteroidetes|c__Bacteroidia|o__Bacteroidales|f__Prevotellaceae|g__Prevotella|s__Prevotella_sp_CAG_255|t__SGB1588
SGB	1589	8	1	kSGB	Species	k__Bacteria|p__Bacteroidetes|c__Bacteroidia|o__Bacteroidales|f__Prevotellaceae|g__Prevotella|s__Prevotella_sp_CAG_1185|t__SGB1589
SGB	1590	6	1	kSGB	Species	k__Bacteria|p__Bacteroidetes|c__Bacteroidia|o__Bacteroidales|f__Prevotellaceae|g__Prevotella|s__Prevotella_sp_CAG_1058|t__SGB1590
SGB	1591	1	0	uSGB	Genus	k__Bacteria|p__Bacteroidetes|c__Bacteroidia|o__Bacteroidales|f__Prevotellaceae|g__Prevotella|s__Prevotella_SGB1591|t__SGB1591
SGB	1592	23	1	kSGB	Species	k__Bacteria|p__Bacteroidetes|c__Bacteroidia|o__Bacteroidales|f__Prevotellaceae|g__Prevotella|s__Prevotella_sp_CAG_1124|t__SGB1592
SGB	1593	8	0	uSGB	Family	k__Bacteria|p__Bacteroidetes|c__Bacteroidia|o__Bacteroidales|f__Prevotellaceae|g__GGB1223|s__GGB1223_SGB1593|t__SGB1593
SGB	1595	3	0	uSGB	Family	k__Bacteria|p__Bacteroidetes|c__Bacteroidia|o__Bacteroidales|f__Prevotellaceae|g__GGB1223|s__GGB1223_SGB1595|t__SGB1595
SGB	1596	7	0	uSGB	Family	k__Bacteria|p__Bacteroidetes|c__Bacteroidia|o__Bacteroidales|f__Prevotellaceae|g__GGB1223|s__GGB1223_SGB1596|t__SGB1596
SGB	1597	1	0	uSGB	Family	k__Bacteria|p__Bacteroidetes|c__Bacteroidia|o__Bacteroidales|f__Prevotellaceae|g__GGB1224|s__GGB1224_SGB1597|t__SGB1597
SGB	1598	1	0	uSGB	Family	k__Bacteria|p__Bacteroidetes|c__Bacteroidia|o__Bacteroidales|f__Prevotellaceae|g__GGB1225|s__GGB1225_SGB1598|t__SGB1598
SGB	1600	56	0	uSGB	Family	k__Bacteria|p__Bacteroidetes|c__Bacteroidia|o__Bacteroidales|f__Prevotellaceae|g__GGB1227|s__GGB1227_SGB1600|t__SGB1600
SGB	1601	5	0	uSGB	Family	k__Bacteria|p__Bacteroidetes|c__Bacteroidia|o__Bacteroidales|f__Prevotellaceae|g__GGB1228|s__GGB1228_SGB1601|t__SGB1601
SGB	1602	1	0	uSGB	Family	k__Bacteria|p__Bacteroidetes|c__Bacteroidia|o__Bacteroidales|f__Prevotellaceae|g__GGB1228|s__GGB1228_SGB1602|t__SGB1602
SGB	1603	1	0	uSGB	Family	k__Bacteria|p__Bacteroidetes|c__Bacteroidia|o__Bacteroidales|f__Prevotellaceae|g__GGB1228|s__GGB1228_SGB1603|t__SGB1603
SGB	1604	1	0	uSGB	Family	k__Bacteria|p__Bacteroidetes|c__Bacteroidia|o__Bacteroidales|f__Prevotellaceae|g__GGB1229|s__GGB1229_SGB1604|t__SGB1604
SGB	1606	17	6	kSGB	Species	k__Bacteria|p__Bacteroidetes|c__Bacteroidia|o__Bacteroidales|f__Prevotellaceae|g__Prevotella|s__Prevotella_sp_P5_126|t__SGB1606
SGB	1612	9	0	uSGB	Genus	k__Bacteria|p__Bacteroidetes|c__Bacteroidia|o__Bacteroidales|f__Prevotellaceae|g__Prevotella|s__Prevotella_SGB1612|t__SGB1612
SGB	1613	321	1	kSGB	Species	k__Bacteria|p__Bacteroidetes|c__Bacteroidia|o__Bacteroidales|f__Prevotellaceae|g__Prevotella|s__Prevotella_sp_CAG_386|t__SGB1613
SGB	1614	82	1	kSGB	Species	k__Bacteria|p__Bacteroidetes|c__Bacteroidia|o__Bacteroidales|f__Prevotellaceae|g__Prevotella|s__Prevotella_sp_CAG_732|t__SGB1614
SGB	1615	36	1	kSGB	Species	k__Bacteria|p__Bacteroidetes|c__Bacteroidia|o__Bacteroidales|f__Prevotellaceae|g__Prevotella|s__Prevotella_sp_CAG_604|t__SGB1615
SGB	1617	75	0	uSGB	Genus	k__Bacteria|p__Bacteroidetes|c__Bacteroidia|o__Bacteroidales|f__Prevotellaceae|g__Prevotella|s__Prevotella_SGB1617|t__SGB1617
SGB	1618	1	0	uSGB	Genus	k__Bacteria|p__Bacteroidetes|c__Bacteroidia|o__Bacteroidales|f__Prevotellaceae|g__Prevotella|s__Prevotella_SGB1618|t__SGB1618
SGB	1619	1	0	uSGB	Genus	k__Bacteria|p__Bacteroidetes|c__Bacteroidia|o__Bacteroidales|f__Prevotellaceae|g__Prevotella|s__Prevotella_SGB1619|t__SGB1619
SGB	1620	1	0	uSGB	Genus	k__Bacteria|p__Bacteroidetes|c__Bacteroidia|o__Bacteroidales|f__Prevotellaceae|g__Prevotella|s__Prevotella_SGB1620|t__SGB1620
SGB	1621	1	0	uSGB	Genus	k__Bacteria|p__Bacteroidetes|c__Bacteroidia|o__Bacteroidales|f__Prevotellaceae|g__Prevotella|s__Prevotella_SGB1621|t__SGB1621
SGB	1622	1	0	uSGB	Genus	k__Bacteria|p__Bacteroidetes|c__Bacteroidia|o__Bacteroidales|f__Prevotellaceae|g__Prevotella|s__Prevotella_SGB1622|t__SGB1622
SGB	1623	13	0	uSGB	Family	k__Bacteria|p__Bacteroidetes|c__Bacteroidia|o__Bacteroidales|f__Prevotellaceae|g__GGB1237|s__GGB1237_SGB1623|t__SGB1623
SGB	1624	27	0	uSGB	Genus	k__Bacteria|p__Bacteroidetes|c__Bacteroidia|o__Bacteroidales|f__Prevotellaceae|g__Prevotella|s__Prevotella_SGB1624|t__SGB1624
SGB	1625	4	0	uSGB	Genus	k__Bacteria|p__Bacteroidetes|c__Bacteroidia|o__Bacteroidales|f__Prevotellaceae|g__Prevotella|s__Prevotella_SGB1625|t__SGB1625
SGB	1626	1146	3	kSGB	Species	k__Bacteria|p__Bacteroidetes|c__Bacteroidia|o__Bacteroidales|f__Prevotellaceae|g__Prevotella|s__Prevotella_copri|t__SGB1626
SGB	1631	1	0	uSGB	Genus	k__Bacteria|p__Bacteroidetes|c__Bacteroidia|o__Bacteroidales|f__Prevotellaceae|g__Prevotella|s__Prevotella_SGB1631|t__SGB1631
SGB	1632	1	0	uSGB	Genus	k__Bacteria|p__Bacteroidetes|c__Bacteroidia|o__Bacteroidales|f__Prevotellaceae|g__Prevotella|s__Prevotella_SGB1632|t__SGB1632
SGB	1633	2	0	uSGB	Genus	k__Bacteria|p__Bacteroidetes|c__Bacteroidia|o__Bacteroidales|f__Prevotellaceae|g__Prevotella|s__Prevotella_SGB1633|t__SGB1633
SGB	1635	16	0	uSGB	Genus	k__Bacteria|p__Bacteroidetes|c__Bacteroidia|o__Bacteroidales|f__Prevotellaceae|g__Prevotella|s__Prevotella_SGB1635|t__SGB1635
SGB	1636	44	0	uSGB	Genus	k__Bacteria|p__Bacteroidetes|c__Bacteroidia|o__Bacteroidales|f__Prevotellaceae|g__Prevotella|s__Prevotella_SGB1636|t__SGB1636
SGB	1637	2	0	uSGB	Genus	k__Bacteria|p__Bacteroidetes|c__Bacteroidia|o__Bacteroidales|f__Prevotellaceae|g__Prevotella|s__Prevotella_SGB1637|t__SGB1637
SGB	1638	10	0	uSGB	Genus	k__Bacteria|p__Bacteroidetes|c__Bacteroidia|o__Bacteroidales|f__Prevotellaceae|g__Prevotella|s__Prevotella_SGB1638|t__SGB1638
SGB	1639	1	0	uSGB	Genus	k__Bacteria|p__Bacteroidetes|c__Bacteroidia|o__Bacteroidales|f__Prevotellaceae|g__Prevotella|s__Prevotella_SGB1639|t__SGB1639
SGB	1640	11	0	uSGB	Genus	k__Bacteria|p__Bacteroidetes|c__Bacteroidia|o__Bacteroidales|f__Prevotellaceae|g__Prevotella|s__Prevotella_SGB1640|t__SGB1640
SGB	1642	4	0	uSGB	Genus	k__Bacteria|p__Bacteroidetes|c__Bacteroidia|o__Bacteroidales|f__Prevotellaceae|g__Prevotella|s__Prevotella_SGB1642|t__SGB1642
SGB	1644	140	1	kSGB	Species	k__Bacteria|p__Bacteroidetes|c__Bacteroidia|o__Bacteroidales|f__Prevotellaceae|g__Prevotella|s__Prevotella_copri|t__SGB1644
SGB	1646	1	0	uSGB	Genus	k__Bacteria|p__Bacteroidetes|c__Bacteroidia|o__Bacteroidales|f__Prevotellaceae|g__Prevotella|s__Prevotella_SGB1646|t__SGB1646
SGB	1647	2	0	uSGB	Genus	k__Bacteria|p__Bacteroidetes|c__Bacteroidia|o__Bacteroidales|f__Prevotellaceae|g__Prevotella|s__Prevotella_SGB1647|t__SGB1647
SGB	1648	4	0	uSGB	Genus	k__Bacteria|p__Bacteroidetes|c__Bacteroidia|o__Bacteroidales|f__Prevotellaceae|g__Prevotella|s__Prevotella_SGB1648|t__SGB1648
SGB	1649	1	0	uSGB	Genus	k__Bacteria|p__Bacteroidetes|c__Bacteroidia|o__Bacteroidales|f__Prevotellaceae|g__Prevotella|s__Prevotella_SGB1649|t__SGB1649
SGB	1650	1	0	uSGB	Genus	k__Bacteria|p__Bacteroidetes|c__Bacteroidia|o__Bacteroidales|f__Prevotellaceae|g__Prevotella|s__Prevotella_SGB1650|t__SGB1650
SGB	1651	1	0	uSGB	Genus	k__Bacteria|p__Bacteroidetes|c__Bacteroidia|o__Bacteroidales|f__Prevotellaceae|g__Prevotella|s__Prevotella_SGB1651|t__SGB1651
SGB	1652	1	0	uSGB	Genus	k__Bacteria|p__Bacteroidetes|c__Bacteroidia|o__Bacteroidales|f__Prevotellaceae|g__Prevotella|s__Prevotella_SGB1652|t__SGB1652
SGB	1653	5	0	uSGB	Genus	k__Bacteria|p__Bacteroidetes|c__Bacteroidia|o__Bacteroidales|f__Prevotellaceae|g__Prevotella|s__Prevotella_SGB1653|t__SGB1653
SGB	1654	5	0	uSGB	Genus	k__Bacteria|p__Bacteroidetes|c__Bacteroidia|o__Bacteroidales|f__Prevotellaceae|g__Prevotella|s__Prevotella_SGB1654|t__SGB1654
SGB	1655	1	0	uSGB	Genus	k__Bacteria|p__Bacteroidetes|c__Bacteroidia|o__Bacteroidales|f__Prevotellaceae|g__Prevotella|s__Prevotella_SGB1655|t__SGB1655
SGB	1656	1	0	uSGB	Genus	k__Bacteria|p__Bacteroidetes|c__Bacteroidia|o__Bacteroidales|f__Prevotellaceae|g__Prevotella|s__Prevotella_SGB1656|t__SGB1656
SGB	1657	142	1	kSGB	Species	k__Bacteria|p__Bacteroidetes|c__Bacteroidia|o__Bacteroidales|f__Prevotellaceae|g__Prevotella|s__Prevotella_sp_CAG_1092|t__SGB1657
SGB	1658	3	0	uSGB	Genus	k__Bacteria|p__Bacteroidetes|c__Bacteroidia|o__Bacteroidales|f__Prevotellaceae|g__Prevotella|s__Prevotella_SGB1658|t__SGB1658
SGB	1659	1	0	uSGB	Family	k__Bacteria|p__Bacteroidetes|c__Bacteroidia|o__Bacteroidales|f__Prevotellaceae|g__GGB1240|s__GGB1240_SGB1659|t__SGB1659
SGB	1662	80	6	kSGB	Species	k__Bacteria|p__Bacteroidetes|c__Bacteroidia|o__Bacteroidales|f__Prevotellaceae|g__Prevotella|s__Prevotella_sp_CAG_592|t__SGB1662
SGB	1663	39	0	uSGB	Family	k__Bacteria|p__Bacteroidetes|c__Bacteroidia|o__Bacteroidales|f__Prevotellaceae|g__GGB1243|s__GGB1243_SGB1663|t__SGB1663
SGB	1664	11	0	uSGB	Family	k__Bacteria|p__Bacteroidetes|c__Bacteroidia|o__Bacteroidales|f__Prevotellaceae|g__GGB1244|s__GGB1244_SGB1664|t__SGB1664
SGB	1665	1	0	uSGB	Family	k__Bacteria|p__Bacteroidetes|c__Bacteroidia|o__Bacteroidales|f__Prevotellaceae|g__GGB1244|s__GGB1244_SGB1665|t__SGB1665
SGB	1666	151	5	kSGB	Species	k__Bacteria|p__Bacteroidetes|c__Bacteroidia|o__Bacteroidales|f__Prevotellaceae|g__Prevotella|s__Prevotella_sp_CAG_474|t__SGB1666
SGB	1667	31	0	uSGB	Family	k__Bacteria|p__Bacteroidetes|c__Bacteroidia|o__Bacteroidales|f__Prevotellaceae|g__GGB1246|s__GGB1246_SGB1667|t__SGB1667
SGB	1668	167	0	uSGB	Family	k__Bacteria|p__Bacteroidetes|c__Bacteroidia|o__Bacteroidales|f__Prevotellaceae|g__GGB1247|s__GGB1247_SGB1668|t__SGB1668
SGB	1669	1	0	uSGB	Family	k__Bacteria|p__Bacteroidetes|c__Bacteroidia|o__Bacteroidales|f__Prevotellaceae|g__GGB1248|s__GGB1248_SGB1669|t__SGB1669
SGB	1670	7	0	uSGB	Family	k__Bacteria|p__Bacteroidetes|c__Bacteroidia|o__Bacteroidales|f__Prevotellaceae|g__GGB1249|s__GGB1249_SGB1670|t__SGB1670
SGB	1671	8	0	uSGB	Family	k__Bacteria|p__Bacteroidetes|c__Bacteroidia|o__Bacteroidales|f__Prevotellaceae|g__GGB1250|s__GGB1250_SGB1671|t__SGB1671
SGB	1672	57	0	uSGB	Family	k__Bacteria|p__Bacteroidetes|c__Bacteroidia|o__Bacteroidales|f__Prevotellaceae|g__GGB1250|s__GGB1250_SGB1672|t__SGB1672
SGB	1673	26	0	uSGB	Family	k__Bacteria|p__Bacteroidetes|c__Bacteroidia|o__Bacteroidales|f__Prevotellaceae|g__GGB1250|s__GGB1250_SGB1673|t__SGB1673
SGB	1674	1	0	uSGB	Family	k__Bacteria|p__Bacteroidetes|c__Bacteroidia|o__Bacteroidales|f__Prevotellaceae|g__GGB1250|s__GGB1250_SGB1674|t__SGB1674
SGB	1675	4	0	uSGB	Family	k__Bacteria|p__Bacteroidetes|c__Bacteroidia|o__Bacteroidales|f__Prevotellaceae|g__GGB1251|s__GGB1251_SGB1675|t__SGB1675
SGB	1676	105	0	uSGB	Family	k__Bacteria|p__Bacteroidetes|c__Bacteroidia|o__Bacteroidales|f__Prevotellaceae|g__GGB1251|s__GGB1251_SGB1676|t__SGB1676
SGB	1677	183	1	kSGB	Species	k__Bacteria|p__Bacteroidetes|c__Bacteroidia|o__Bacteroidales|f__Prevotellaceae|g__Prevotella|s__Prevotella_sp_885|t__SGB1677
SGB	1679	210	2	kSGB	Species	k__Bacteria|p__Bacteroidetes|c__Bacteroidia|o__Bacteroidales|f__Prevotellaceae|g__Prevotella|s__Prevotella_stercorea|t__SGB1679
SGB	1680	246	1	kSGB	Species	k__Bacteria|p__Bacteroidetes|c__Bacteroidia|o__Bacteroidales|f__Prevotellaceae|g__Prevotella|s__Prevotella_sp_CAG_520|t__SGB1680
SGB	1683	1	0	uSGB	Family	k__Bacteria|p__Bacteroidetes|c__Bacteroidia|o__Bacteroidales|f__Prevotellaceae|g__GGB1255|s__GGB1255_SGB1683|t__SGB1683
SGB	1684	24	1	kSGB	Species	k__Bacteria|p__Bacteroidetes|c__Bacteroidia|o__Bacteroidales|f__Prevotellaceae|g__Prevotella|s__Prevotella_sp_CAG_924|t__SGB1684
SGB	1685	1	0	uSGB	Family	k__Bacteria|p__Bacteroidetes|c__Bacteroidia|o__Bacteroidales|f__Prevotellaceae|g__GGB1257|s__GGB1257_SGB1685|t__SGB1685
SGB	1687	10	0	uSGB	Family	k__Bacteria|p__Bacteroidetes|c__Bacteroidia|o__Bacteroidales|f__Prevotellaceae|g__GGB1259|s__GGB1259_SGB1687|t__SGB1687
SGB	1688	3	0	uSGB	Family	k__Bacteria|p__Bacteroidetes|c__Bacteroidia|o__Bacteroidales|f__Prevotellaceae|g__GGB1259|s__GGB1259_SGB1688|t__SGB1688
SGB	1689	5	0	uSGB	Family	k__Bacteria|p__Bacteroidetes|c__Bacteroidia|o__Bacteroidales|f__Prevotellaceae|g__GGB1259|s__GGB1259_SGB1689|t__SGB1689
SGB	1690	4	0	uSGB	Family	k__Bacteria|p__Bacteroidetes|c__Bacteroidia|o__Bacteroidales|f__Prevotellaceae|g__GGB1259|s__GGB1259_SGB1690|t__SGB1690
SGB	1691	1	0	uSGB	Family	k__Bacteria|p__Bacteroidetes|c__Bacteroidia|o__Bacteroidales|f__Prevotellaceae|g__GGB1259|s__GGB1259_SGB1691|t__SGB1691
SGB	1692	6	0	uSGB	Family	k__Bacteria|p__Bacteroidetes|c__Bacteroidia|o__Bacteroidales|f__Prevotellaceae|g__GGB1260|s__GGB1260_SGB1692|t__SGB1692
SGB	1695	1	0	uSGB	Family	k__Bacteria|p__Bacteroidetes|c__Bacteroidia|o__Bacteroidales|f__Prevotellaceae|g__GGB1262|s__GGB1262_SGB1695|t__SGB1695
SGB	1697	27	1	kSGB	Species	k__Bacteria|p__Bacteroidetes|c__Bacteroidia|o__Bacteroidales|f__Prevotellaceae|g__Prevotella|s__Prevotella_sp_CAG_1320|t__SGB1697
SGB	1699	462	0	uSGB	Family	k__Bacteria|p__Bacteroidetes|c__Bacteroidia|o__Bacteroidales|f__Prevotellaceae|g__GGB1266|s__GGB1266_SGB1699|t__SGB1699
SGB	1701	82	0	uSGB	Family	k__Bacteria|p__Bacteroidetes|c__Bacteroidia|o__Bacteroidales|f__Prevotellaceae|g__GGB1267|s__GGB1267_SGB1701|t__SGB1701
SGB	1702	1	1	kSGB	Species	k__Bacteria|p__Bacteroidetes|c__Bacteroidia|o__Bacteroidales|f__Prevotellaceae|g__Prevotella|s__Prevotella_multisaccharivorax|t__SGB1702
SGB	1704	1	0	uSGB	Family	k__Bacteria|p__Bacteroidetes|c__Bacteroidia|o__Bacteroidales|f__Prevotellaceae|g__GGB1269|s__GGB1269_SGB1704|t__SGB1704
SGB	1705	64	0	uSGB	Family	k__Bacteria|p__Bacteroidetes|c__Bacteroidia|o__Bacteroidales|f__Prevotellaceae|g__GGB1270|s__GGB1270_SGB1705|t__SGB1705
SGB	1710	1	1	kSGB	Species	k__Bacteria|p__Bacteroidetes|c__Bacteroidia|o__Bacteroidales|f__Prevotellaceae|g__Prevotella|s__Prevotella_sp_P3_122|t__SGB1710
SGB	1711	0	1	kSGB	Species	k__Bacteria|p__Bacteroidetes|c__Bacteroidia|o__Bacteroidales|f__Prevotellaceae|g__Prevotella|s__Prevotella_sp_P5_92|t__SGB1711
SGB	1712	0	1	kSGB	Species	k__Bacteria|p__Bacteroidetes|c__Bacteroidia|o__Bacteroidales|f__Prevotellaceae|g__Prevotella|s__Prevotella_sp_P2_180|t__SGB1712
SGB	1714	4	0	uSGB	Other	k__Bacteria|p__Bacteroidetes|c__CFGB582|o__OFGB582|f__FGB582|g__GGB1277|s__GGB1277_SGB1714|t__SGB1714
SGB	1715	1	0	uSGB	Other	k__Bacteria|p__Bacteroidetes|c__CFGB582|o__OFGB582|f__FGB582|g__GGB1278|s__GGB1278_SGB1715|t__SGB1715
SGB	1726	0	1	kSGB	Species	k__Bacteria|p__Bacteroidetes|c__Bacteroidia|o__Bacteroidales|f__Prevotellaceae|g__Prevotella|s__Prevotella_sp_tf2_5|t__SGB1726
SGB	1734	0	1	kSGB	Species	k__Bacteria|p__Bacteroidetes|c__Bacteroidia|o__Bacteroidales|f__Prevotellaceae|g__Prevotella|s__Prevotella_sp_tc2_28|t__SGB1734
SGB	1740	0	1	kSGB	Species	k__Bacteria|p__Bacteroidetes|c__Bacteroidia|o__Bacteroidales|f__Prevotellaceae|g__Prevotellaceae_unclassified|s__Prevotellaceae_bacterium_HUN156|t__SGB1740
SGB	1741	0	1	kSGB	Species	k__Bacteria|p__Bacteroidetes|c__Bacteroidia|o__Bacteroidales|f__Prevotellaceae|g__Prevotellaceae_unclassified|s__Prevotellaceae_bacterium_MN60|t__SGB1741
SGB	1743	0	2	kSGB	Species	k__Bacteria|p__Bacteroidetes|c__Bacteroidia|o__Bacteroidales|f__Prevotellaceae|g__Prevotella|s__Prevotella_sp_lc2012|t__SGB1743
SGB	1744	0	2	kSGB	Species	k__Bacteria|p__Bacteroidetes|c__Bacteroidia|o__Bacteroidales|f__Prevotellaceae|g__Prevotella|s__Prevotella_sp_BP1_148|t__SGB1744
SGB	1745	0	2	kSGB	Species	k__Bacteria|p__Bacteroidetes|c__Bacteroidia|o__Bacteroidales|f__Prevotellaceae|g__Prevotella|s__Prevotella_ruminicola|t__SGB1745
SGB	1746	0	5	kSGB	Species	k__Bacteria|p__Bacteroidetes|c__Bacteroidia|o__Bacteroidales|f__Prevotellaceae|g__Prevotella|s__Prevotella_ruminicola|t__SGB1746
SGB	1747	0	1	kSGB	Species	k__Bacteria|p__Bacteroidetes|c__Bacteroidia|o__Bacteroidales|f__Prevotellaceae|g__Prevotella|s__Prevotella_ruminicola|t__SGB1747
SGB	1748	0	1	kSGB	Species	k__Bacteria|p__Bacteroidetes|c__Bacteroidia|o__Bacteroidales|f__Prevotellaceae|g__Prevotella|s__Prevotella_ruminicola|t__SGB1748
SGB	1750	0	1	kSGB	Species	k__Bacteria|p__Bacteroidetes|c__Bacteroidia|o__Bacteroidales|f__Prevotellaceae|g__Prevotella|s__Prevotella_sp_ne3005|t__SGB1750
SGB	1767	0	1	kSGB	Species	k__Bacteria|p__Bacteroidetes|c__Bacteroidia|o__Bacteroidales|f__Bacteroidales_unclassified|g__Bacteroidales_unclassified|s__Bacteroidales_bacterium_45_6|t__SGB1767
SGB	1769	3	0	uSGB	Family	k__Bacteria|p__Bacteroidetes|c__Bacteroidia|o__Bacteroidales|f__Dysgonamonadaceae|g__GGB1321|s__GGB1321_SGB1769|t__SGB1769
SGB	1770	0	1	kSGB	Species	k__Bacteria|p__Bacteroidetes|c__Bacteroidia|o__Bacteroidales|f__Dysgonamonadaceae|g__Dysgonomonas|s__Dysgonomonas_macrotermitis|t__SGB1770
SGB	1772	0	1	kSGB	Species	k__Bacteria|p__Bacteroidetes|c__Bacteroidia|o__Bacteroidales|f__Dysgonamonadaceae|g__Dysgonomonas|s__Dysgonomonas_sp_37_18|t__SGB1772
SGB	1773	1	1	kSGB	Species	k__Bacteria|p__Bacteroidetes|c__Bacteroidia|o__Bacteroidales|f__Dysgonamonadaceae|g__Dysgonomonas|s__Dysgonomonas_mossii|t__SGB1773
SGB	1774	0	1	kSGB	Species	k__Bacteria|p__Bacteroidetes|c__Bacteroidia|o__Bacteroidales|f__Dysgonamonadaceae|g__Dysgonomonas|s__Dysgonomonas_gadei|t__SGB1774
SGB	1776	0	2	kSGB	Species	k__Bacteria|p__Bacteroidetes|c__Bacteroidia|o__Bacteroidales|f__Porphyromonadaceae|g__Sanguibacteroides|s__Sanguibacteroides_justesenii|t__SGB1776
SGB	1777	3	0	uSGB	Genus	k__Bacteria|p__Bacteroidetes|c__Bacteroidia|o__Bacteroidales|f__Porphyromonadaceae|g__Sanguibacteroides|s__Sanguibacteroides_SGB1777|t__SGB1777
SGB	1778	3	0	uSGB	Family	k__Bacteria|p__Bacteroidetes|c__Bacteroidia|o__Bacteroidales|f__Porphyromonadaceae|g__GGB1327|s__GGB1327_SGB1778|t__SGB1778
SGB	1779	1	0	uSGB	Family	k__Bacteria|p__Bacteroidetes|c__Bacteroidia|o__Bacteroidales|f__Porphyromonadaceae|g__GGB1328|s__GGB1328_SGB1779|t__SGB1779
SGB	1780	1	0	uSGB	Family	k__Bacteria|p__Bacteroidetes|c__Bacteroidia|o__Bacteroidales|f__Porphyromonadaceae|g__GGB1328|s__GGB1328_SGB1780|t__SGB1780
SGB	1781	6	0	uSGB	Family	k__Bacteria|p__Bacteroidetes|c__Bacteroidia|o__Bacteroidales|f__Porphyromonadaceae|g__GGB1329|s__GGB1329_SGB1781|t__SGB1781
SGB	1782	33	0	uSGB	Genus	k__Bacteria|p__Bacteroidetes|c__Bacteroidia|o__Bacteroidales|f__Odoribacteraceae|g__Butyricimonas|s__Butyricimonas_SGB1782|t__SGB1782
SGB	1783	41	0	uSGB	Genus	k__Bacteria|p__Bacteroidetes|c__Bacteroidia|o__Bacteroidales|f__Odoribacteraceae|g__Butyricimonas|s__Butyricimonas_SGB1783|t__SGB1783
SGB	1784	99	0	uSGB	Genus	k__Bacteria|p__Bacteroidetes|c__Bacteroidia|o__Bacteroidales|f__Odoribacteraceae|g__Butyricimonas|s__Butyricimonas_SGB1784|t__SGB1784
SGB	1785	45	1	kSGB	Species	k__Bacteria|p__Bacteroidetes|c__Bacteroidia|o__Bacteroidales|f__Odoribacteraceae|g__Butyricimonas|s__Butyricimonas_sp_An62|t__SGB1785
SGB	1786	54	1	kSGB	Species	k__Bacteria|p__Bacteroidetes|c__Bacteroidia|o__Bacteroidales|f__Odoribacteraceae|g__Butyricimonas|s__Butyricimonas_synergistica|t__SGB1786
SGB	1787	3	0	uSGB	Family	k__Bacteria|p__Bacteroidetes|c__Bacteroidia|o__Bacteroidales|f__Odoribacteraceae|g__GGB1331|s__GGB1331_SGB1787|t__SGB1787
SGB	1788	3	0	uSGB	Family	k__Bacteria|p__Bacteroidetes|c__Bacteroidia|o__Bacteroidales|f__Odoribacteraceae|g__GGB1331|s__GGB1331_SGB1788|t__SGB1788
SGB	1789	5	0	uSGB	Family	k__Bacteria|p__Bacteroidetes|c__Bacteroidia|o__Bacteroidales|f__Odoribacteraceae|g__GGB1332|s__GGB1332_SGB1789|t__SGB1789
SGB	1790	945	5	kSGB	Species	k__Bacteria|p__Bacteroidetes|c__Bacteroidia|o__Bacteroidales|f__Odoribacteraceae|g__Odoribacter|s__Odoribacter_splanchnicus|t__SGB1790
SGB	1791	22	1	kSGB	Species	k__Bacteria|p__Bacteroidetes|c__Bacteroidia|o__Bacteroidales|f__Odoribacteraceae|g__Odoribacter|s__Odoribacter_sp_CAG_788|t__SGB1791
SGB	1792	28	2	kSGB	Species	k__Bacteria|p__Bacteroidetes|c__Bacteroidia|o__Bacteroidales|f__Odoribacteraceae|g__Odoribacter|s__Odoribacter_laneus|t__SGB1792
SGB	1793	1	0	uSGB	Family	k__Bacteria|p__Bacteroidetes|c__Bacteroidia|o__Bacteroidales|f__Odoribacteraceae|g__GGB1336|s__GGB1336_SGB1793|t__SGB1793
SGB	1795	13	0	uSGB	Other	k__Bacteria|p__Firmicutes|c__CFGB591|o__OFGB591|f__FGB591|g__GGB1338|s__GGB1338_SGB1795|t__SGB1795
SGB	1796	4	0	uSGB	Family	k__Bacteria|p__Bacteroidetes|c__Bacteroidia|o__Bacteroidales|f__Prevotellaceae|g__GGB1339|s__GGB1339_SGB1796|t__SGB1796
SGB	1797	63	1	kSGB	Species	k__Bacteria|p__Bacteroidetes|c__Bacteroidia|o__Bacteroidales|f__Prevotellaceae|g__Paraprevotella|s__Paraprevotella_xylaniphila|t__SGB1797
SGB	1798	564	2	kSGB	Species	k__Bacteria|p__Bacteroidetes|c__Bacteroidia|o__Bacteroidales|f__Prevotellaceae|g__Paraprevotella|s__Paraprevotella_clara|t__SGB1798
SGB	1799	1	0	uSGB	Family	k__Bacteria|p__Bacteroidetes|c__Bacteroidia|o__Bacteroidales|f__Prevotellaceae|g__GGB1341|s__GGB1341_SGB1799|t__SGB1799
SGB	1800	1	0	uSGB	Family	k__Bacteria|p__Bacteroidetes|c__Bacteroidia|o__Bacteroidales|f__Prevotellaceae|g__GGB1342|s__GGB1342_SGB1800|t__SGB1800
SGB	1801	1	0	uSGB	Family	k__Bacteria|p__Bacteroidetes|c__Bacteroidia|o__Bacteroidales|f__Prevotellaceae|g__GGB1343|s__GGB1343_SGB1801|t__SGB1801
SGB	1802	2	0	uSGB	Other	k__Bacteria|p__Bacteroidetes|c__CFGB593|o__OFGB593|f__FGB593|g__GGB1344|s__GGB1344_SGB1802|t__SGB1802
SGB	1803	1	0	uSGB	Other	k__Bacteria|p__Bacteroidetes|c__CFGB593|o__OFGB593|f__FGB593|g__GGB1345|s__GGB1345_SGB1803|t__SGB1803
SGB	1804	1	0	uSGB	Other	k__Bacteria|p__Bacteroidetes|c__CFGB594|o__OFGB594|f__FGB594|g__GGB1346|s__GGB1346_SGB1804|t__SGB1804
SGB	1805	1	0	uSGB	Other	k__Bacteria|p__Bacteroidetes|c__CFGB594|o__OFGB594|f__FGB594|g__GGB1347|s__GGB1347_SGB1805|t__SGB1805
SGB	1806	1	4	kSGB	Species	k__Bacteria|p__Bacteroidetes|c__Bacteroidia|o__Bacteroidales|f__Bacteroidaceae|g__Bacteroides|s__Bacteroides_pyogenes|t__SGB1806
SGB	1807	0	1	kSGB	Species	k__Bacteria|p__Bacteroidetes|c__Bacteroidia|o__Bacteroidales|f__Bacteroidaceae|g__Bacteroides|s__Bacteroides_reticulotermitis|t__SGB1807
SGB	1808	1	0	uSGB	Family	k__Bacteria|p__Bacteroidetes|c__Bacteroidia|o__Bacteroidales|f__Bacteroidaceae|g__GGB1350|s__GGB1350_SGB1808|t__SGB1808
SGB	1809	5	0	uSGB	Family	k__Bacteria|p__Bacteroidetes|c__Bacteroidia|o__Bacteroidales|f__Bacteroidaceae|g__GGB1351|s__GGB1351_SGB1809|t__SGB1809
SGB	1810	3	0	uSGB	Genus	k__Bacteria|p__Bacteroidetes|c__Bacteroidia|o__Bacteroidales|f__Bacteroidaceae|g__Bacteroides|s__Bacteroides_SGB1810|t__SGB1810
SGB	1811	2	0	uSGB	Genus	k__Bacteria|p__Bacteroidetes|c__Bacteroidia|o__Bacteroidales|f__Bacteroidaceae|g__Bacteroides|s__Bacteroides_SGB1811|t__SGB1811
SGB	1812	319	2	kSGB	Species	k__Bacteria|p__Bacteroidetes|c__Bacteroidia|o__Bacteroidales|f__Bacteroidaceae|g__Bacteroides|s__Bacteroides_massiliensis|t__SGB1812
SGB	1813	2	1	kSGB	Species	k__Bacteria|p__Bacteroidetes|c__Bacteroidia|o__Bacteroidales|f__Bacteroidaceae|g__Bacteroides|s__Bacteroides_sartorii|t__SGB1813
SGB	1814	1844	15	kSGB	Species	k__Bacteria|p__Bacteroidetes|c__Bacteroidia|o__Bacteroidales|f__Bacteroidaceae|g__Bacteroides|s__Bacteroides_vulgatus|t__SGB1814
SGB	1815	656	13	kSGB	Species	k__Bacteria|p__Bacteroidetes|c__Bacteroidia|o__Bacteroidales|f__Bacteroidaceae|g__Bacteroides|s__Bacteroides_dorei|t__SGB1815
SGB	1816	1	0	uSGB	Genus	k__Bacteria|p__Bacteroidetes|c__Bacteroidia|o__Bacteroidales|f__Bacteroidaceae|g__Bacteroides|s__Bacteroides_SGB1816|t__SGB1816
SGB	1817	1	0	uSGB	Genus	k__Bacteria|p__Bacteroidetes|c__Bacteroidia|o__Bacteroidales|f__Bacteroidaceae|g__Bacteroides|s__Bacteroides_SGB1817|t__SGB1817
SGB	1818	1	0	uSGB	Family	k__Bacteria|p__Bacteroidetes|c__Bacteroidia|o__Bacteroidales|f__Bacteroidaceae|g__GGB1354|s__GGB1354_SGB1818|t__SGB1818
SGB	1819	4	0	uSGB	Family	k__Bacteria|p__Bacteroidetes|c__Bacteroidia|o__Bacteroidales|f__Bacteroidaceae|g__GGB1355|s__GGB1355_SGB1819|t__SGB1819
SGB	1820	2	0	uSGB	Genus	k__Bacteria|p__Bacteroidetes|c__Bacteroidia|o__Bacteroidales|f__Bacteroidaceae|g__Bacteroides|s__Bacteroides_SGB1820|t__SGB1820
SGB	1821	16	1	kSGB	Species	k__Bacteria|p__Bacteroidetes|c__Bacteroidia|o__Bacteroidales|f__Bacteroidaceae|g__Bacteroides|s__Bacteroides_sp_CAG_633|t__SGB1821
SGB	1822	36	1	kSGB	Species	k__Bacteria|p__Bacteroidetes|c__Bacteroidia|o__Bacteroidales|f__Bacteroidaceae|g__Bacteroides|s__Bacteroides_sp_CAG_598|t__SGB1822
SGB	1823	3	0	uSGB	Genus	k__Bacteria|p__Bacteroidetes|c__Bacteroidia|o__Bacteroidales|f__Bacteroidaceae|g__Bacteroides|s__Bacteroides_SGB1823|t__SGB1823
SGB	1824	24	1	kSGB	Species	k__Bacteria|p__Bacteroidetes|c__Bacteroidia|o__Bacteroidales|f__Bacteroidaceae|g__Bacteroides|s__Bacteroides_sp_CAG_661|t__SGB1824
SGB	1825	1	0	uSGB	Family	k__Bacteria|p__Bacteroidetes|c__Bacteroidia|o__Bacteroidales|f__Bacteroidaceae|g__GGB1358|s__GGB1358_SGB1825|t__SGB1825
SGB	1826	2	0	uSGB	Family	k__Bacteria|p__Bacteroidetes|c__Bacteroidia|o__Bacteroidales|f__Bacteroidaceae|g__GGB1359|s__GGB1359_SGB1826|t__SGB1826
SGB	1827	4	0	uSGB	Family	k__Bacteria|p__Bacteroidetes|c__Bacteroidia|o__Bacteroidales|f__Bacteroidaceae|g__GGB1360|s__GGB1360_SGB1827|t__SGB1827
SGB	1828	3	0	uSGB	Family	k__Bacteria|p__Bacteroidetes|c__Bacteroidia|o__Bacteroidales|f__Bacteroidaceae|g__GGB1361|s__GGB1361_SGB1828|t__SGB1828
SGB	1829	251	3	kSGB	Species	k__Bacteria|p__Bacteroidetes|c__Bacteroidia|o__Bacteroidales|f__Bacteroidaceae|g__Bacteroides|s__Bacteroides_eggerthii|t__SGB1829
SGB	1830	883	5	kSGB	Species	k__Bacteria|p__Bacteroidetes|c__Bacteroidia|o__Bacteroidales|f__Bacteroidaceae|g__Bacteroides|s__Bacteroides_stercoris|t__SGB1830
SGB	1831	6	0	uSGB	Genus	k__Bacteria|p__Bacteroidetes|c__Bacteroidia|o__Bacteroidales|f__Bacteroidaceae|g__Bacteroides|s__Bacteroides_SGB1831|t__SGB1831
SGB	1832	92	5	kSGB	Species	k__Bacteria|p__Bacteroidetes|c__Bacteroidia|o__Bacteroidales|f__Bacteroidaceae|g__Bacteroides|s__Bacteroides_clarus|t__SGB1832
SGB	1833	2	0	uSGB	Family	k__Bacteria|p__Bacteroidetes|c__Bacteroidia|o__Bacteroidales|f__Bacteroidaceae|g__GGB1364|s__GGB1364_SGB1833|t__SGB1833
SGB	1834	2	0	uSGB	Family	k__Bacteria|p__Bacteroidetes|c__Bacteroidia|o__Bacteroidales|f__Bacteroidaceae|g__GGB1364|s__GGB1364_SGB1834|t__SGB1834
SGB	1835	5	1	kSGB	Species	k__Bacteria|p__Bacteroidetes|c__Bacteroidia|o__Bacteroidales|f__Bacteroidaceae|g__Bacteroides|s__Bacteroides_fluxus|t__SGB1835
SGB	1836	2984	20	kSGB	Species	k__Bacteria|p__Bacteroidetes|c__Bacteroidia|o__Bacteroidales|f__Bacteroidaceae|g__Bacteroides|s__Bacteroides_uniformis|t__SGB1836
SGB	1838	1	0	uSGB	Genus	k__Bacteria|p__Bacteroidetes|c__Bacteroidia|o__Bacteroidales|f__Bacteroidaceae|g__Bacteroides|s__Bacteroides_SGB1838|t__SGB1838
SGB	1839	0	1	kSGB	Species	k__Bacteria|p__Bacteroidetes|c__Bacteroidia|o__Bacteroidales|f__Bacteroidaceae|g__Bacteroides|s__Bacteroides_helcogenes|t__SGB1839
SGB	1840	3	0	uSGB	Family	k__Bacteria|p__Bacteroidetes|c__Bacteroidia|o__Bacteroidales|f__Bacteroidaceae|g__GGB1368|s__GGB1368_SGB1840|t__SGB1840
SGB	1842	13	0	uSGB	Genus	k__Bacteria|p__Bacteroidetes|c__Bacteroidia|o__Bacteroidales|f__Bacteroidaceae|g__Bacteroides|s__Bacteroides_SGB1842|t__SGB1842
SGB	1843	2	0	uSGB	Genus	k__Bacteria|p__Bacteroidetes|c__Bacteroidia|o__Bacteroidales|f__Bacteroidaceae|g__Bacteroides|s__Bacteroides_SGB1843|t__SGB1843
SGB	1844	234	7	kSGB	Species	k__Bacteria|p__Bacteroidetes|c__Bacteroidia|o__Bacteroidales|f__Bacteroidaceae|g__Bacteroides|s__Bacteroides_cellulosilyticus|t__SGB1844
SGB	1845	16	1	kSGB	Species	k__Bacteria|p__Bacteroidetes|c__Bacteroidia|o__Bacteroidales|f__Bacteroidaceae|g__Bacteroides|s__Bacteroides_intestinalis_CAG_315|t__SGB1845
SGB	1846	82	2	kSGB	Species	k__Bacteria|p__Bacteroidetes|c__Bacteroidia|o__Bacteroidales|f__Bacteroidaceae|g__Bacteroides|s__Bacteroides_intestinalis|t__SGB1846
SGB	1847	1	0	uSGB	Genus	k__Bacteria|p__Bacteroidetes|c__Bacteroidia|o__Bacteroidales|f__Bacteroidaceae|g__Bacteroides|s__Bacteroides_SGB1847|t__SGB1847
SGB	1848	6	2	kSGB	Species	k__Bacteria|p__Bacteroidetes|c__Bacteroidia|o__Bacteroidales|f__Bacteroidaceae|g__Bacteroides|s__Bacteroides_oleiciplenus|t__SGB1848
SGB	1849	2	0	uSGB	Genus	k__Bacteria|p__Bacteroidetes|c__Bacteroidia|o__Bacteroidales|f__Bacteroidaceae|g__Bacteroides|s__Bacteroides_SGB1849|t__SGB1849
SGB	1850	0	1	kSGB	Species	k__Bacteria|p__Bacteroidetes|c__Bacteroidia|o__Bacteroidales|f__Bacteroidaceae|g__Bacteroides|s__Bacteroides_oleiciplenus|t__SGB1850
SGB	1851	1	0	uSGB	Genus	k__Bacteria|p__Bacteroidetes|c__Bacteroidia|o__Bacteroidales|f__Bacteroidaceae|g__Bacteroides|s__Bacteroides_SGB1851|t__SGB1851
SGB	1853	65	12	kSGB	Species	k__Bacteria|p__Bacteroidetes|c__Bacteroidia|o__Bacteroidales|f__Bacteroidaceae|g__Bacteroides|s__Bacteroides_fragilis|t__SGB1853
SGB	1854	2	0	uSGB	Genus	k__Bacteria|p__Bacteroidetes|c__Bacteroidia|o__Bacteroidales|f__Bacteroidaceae|g__Bacteroides|s__Bacteroides_SGB1854|t__SGB1854
SGB	1855	439	100	kSGB	Species	k__Bacteria|p__Bacteroidetes|c__Bacteroidia|o__Bacteroidales|f__Bacteroidaceae|g__Bacteroides|s__Bacteroides_fragilis|t__SGB1855
SGB	1856	1	0	uSGB	Genus	k__Bacteria|p__Bacteroidetes|c__Bacteroidia|o__Bacteroidales|f__Bacteroidaceae|g__Bacteroides|s__Bacteroides_SGB1856|t__SGB1856
SGB	1857	33	4	kSGB	Species	k__Bacteria|p__Bacteroidetes|c__Bacteroidia|o__Bacteroidales|f__Bacteroidaceae|g__Bacteroides|s__Bacteroides_salyersiae|t__SGB1857
SGB	1858	28	2	kSGB	Species	k__Bacteria|p__Bacteroidetes|c__Bacteroidia|o__Bacteroidales|f__Bacteroidaceae|g__Bacteroides|s__Bacteroides_nordii|t__SGB1858
SGB	1859	2	0	uSGB	Family	k__Bacteria|p__Bacteroidetes|c__Bacteroidia|o__Bacteroidales|f__Bacteroidaceae|g__GGB1374|s__GGB1374_SGB1859|t__SGB1859
SGB	1860	79	5	kSGB	Species	k__Bacteria|p__Bacteroidetes|c__Bacteroidia|o__Bacteroidales|f__Bacteroidaceae|g__Bacteroides|s__Bacteroides_faecis_CAG_32|t__SGB1860
SGB	1861	317	13	kSGB	Species	k__Bacteria|p__Bacteroidetes|c__Bacteroidia|o__Bacteroidales|f__Bacteroidaceae|g__Bacteroides|s__Bacteroides_thetaiotaomicron|t__SGB1861
SGB	1862	59	5	kSGB	Species	k__Bacteria|p__Bacteroidetes|c__Bacteroidia|o__Bacteroidales|f__Bacteroidaceae|g__Bacteroides|s__Bacteroides_finegoldii|t__SGB1862
SGB	1863	0	1	kSGB	Species	k__Bacteria|p__Bacteroidetes|c__Bacteroidia|o__Bacteroidales|f__Bacteroidaceae|g__Bacteroides|s__Bacteroides_caecimuris|t__SGB1863
SGB	1865	7	0	uSGB	Genus	k__Bacteria|p__Bacteroidetes|c__Bacteroidia|o__Bacteroidales|f__Bacteroidaceae|g__Bacteroides|s__Bacteroides_SGB1865|t__SGB1865
SGB	1866	2	0	uSGB	Genus	k__Bacteria|p__Bacteroidetes|c__Bacteroidia|o__Bacteroidales|f__Bacteroidaceae|g__Bacteroides|s__Bacteroides_SGB1866|t__SGB1866
SGB	1867	151	16	kSGB	Species	k__Bacteria|p__Bacteroidetes|c__Bacteroidia|o__Bacteroidales|f__Bacteroidaceae|g__Bacteroides|s__Bacteroides_xylanisolvens|t__SGB1867
SGB	1868	1	0	uSGB	Genus	k__Bacteria|p__Bacteroidetes|c__Bacteroidia|o__Bacteroidales|f__Bacteroidaceae|g__Bacteroides|s__Bacteroides_SGB1868|t__SGB1868
SGB	1869	1	0	uSGB	Genus	k__Bacteria|p__Bacteroidetes|c__Bacteroidia|o__Bacteroidales|f__Bacteroidaceae|g__Bacteroides|s__Bacteroides_SGB1869|t__SGB1869
SGB	1870	6	1	kSGB	Species	k__Bacteria|p__Bacteroidetes|c__Bacteroidia|o__Bacteroidales|f__Bacteroidaceae|g__Bacteroides|s__Bacteroides_sp_D2|t__SGB1870
SGB	1871	3	0	uSGB	Genus	k__Bacteria|p__Bacteroidetes|c__Bacteroidia|o__Bacteroidales|f__Bacteroidaceae|g__Bacteroides|s__Bacteroides_SGB1871|t__SGB1871
SGB	1872	487	21	kSGB	Species	k__Bacteria|p__Bacteroidetes|c__Bacteroidia|o__Bacteroidales|f__Bacteroidaceae|g__Bacteroides|s__Bacteroides_ovatus|t__SGB1872
SGB	1873	1	0	uSGB	Genus	k__Bacteria|p__Bacteroidetes|c__Bacteroidia|o__Bacteroidales|f__Bacteroidaceae|g__Bacteroides|s__Bacteroides_SGB1873|t__SGB1873
SGB	1874	1	0	uSGB	Genus	k__Bacteria|p__Bacteroidetes|c__Bacteroidia|o__Bacteroidales|f__Bacteroidaceae|g__Bacteroides|s__Bacteroides_SGB1874|t__SGB1874
SGB	1875	1	0	uSGB	Genus	k__Bacteria|p__Bacteroidetes|c__Bacteroidia|o__Bacteroidales|f__Bacteroidaceae|g__Bacteroides|s__Bacteroides_SGB1875|t__SGB1875
SGB	1876	1	0	uSGB	Genus	k__Bacteria|p__Bacteroidetes|c__Bacteroidia|o__Bacteroidales|f__Bacteroidaceae|g__Bacteroides|s__Bacteroides_SGB1876|t__SGB1876
SGB	1877	315	5	kSGB	Species	k__Bacteria|p__Bacteroidetes|c__Bacteroidia|o__Bacteroidales|f__Bacteroidaceae|g__Bacteroides|s__Bacteroides_caccae|t__SGB1877
SGB	1878	3	1	kSGB	Species	k__Bacteria|p__Bacteroidetes|c__Bacteroidia|o__Bacteroidales|f__Bacteroidaceae|g__Bacteroides|s__Bacteroides_sp_CAG_754|t__SGB1878
SGB	1879	1	0	uSGB	Genus	k__Bacteria|p__Bacteroidetes|c__Bacteroidia|o__Bacteroidales|f__Bacteroidaceae|g__Bacteroides|s__Bacteroides_SGB1879|t__SGB1879
SGB	1880	2	0	uSGB	Family	k__Bacteria|p__Bacteroidetes|c__Bacteroidia|o__Bacteroidales|f__Bacteroidaceae|g__GGB1379|s__GGB1379_SGB1880|t__SGB1880
SGB	1881	1	0	uSGB	Family	k__Bacteria|p__Bacteroidetes|c__Bacteroidia|o__Bacteroidales|f__Bacteroidaceae|g__GGB1379|s__GGB1379_SGB1881|t__SGB1881
SGB	1882	3	0	uSGB	Genus	k__Bacteria|p__Bacteroidetes|c__Bacteroidia|o__Bacteroidales|f__Bacteroidaceae|g__Bacteroides|s__Bacteroides_SGB1882|t__SGB1882
SGB	1883	58	1	kSGB	Species	k__Bacteria|p__Bacteroidetes|c__Bacteroidia|o__Bacteroidales|f__Bacteroidaceae|g__Bacteroides|s__Bacteroides_sp_CAG_530|t__SGB1883
SGB	1884	1	0	uSGB	Genus	k__Bacteria|p__Bacteroidetes|c__Bacteroidia|o__Bacteroidales|f__Bacteroidaceae|g__Bacteroides|s__Bacteroides_SGB1884|t__SGB1884
SGB	1885	1	0	uSGB	Genus	k__Bacteria|p__Bacteroidetes|c__Bacteroidia|o__Bacteroidales|f__Bacteroidaceae|g__Bacteroides|s__Bacteroides_SGB1885|t__SGB1885
SGB	1886	0	1	kSGB	Species	k__Bacteria|p__Bacteroidetes|c__Bacteroidia|o__Bacteroidales|f__Bacteroidaceae|g__Bacteroides|s__Bacteroides_sp|t__SGB1886
SGB	1887	41	0	uSGB	Family	k__Bacteria|p__Bacteroidetes|c__Bacteroidia|o__Bacteroidales|f__Bacteroidaceae|g__GGB1382|s__GGB1382_SGB1887|t__SGB1887
SGB	1888	198	2	kSGB	Species	k__Bacteria|p__Bacteroidetes|c__Bacteroidia|o__Bacteroidales|f__Bacteroidaceae|g__Bacteroides|s__Bacteroides_coprophilus|t__SGB1888
SGB	1889	4	0	uSGB	Family	k__Bacteria|p__Bacteroidetes|c__Bacteroidia|o__Bacteroidales|f__Bacteroidaceae|g__GGB1384|s__GGB1384_SGB1889|t__SGB1889
SGB	1890	15	0	uSGB	Family	k__Bacteria|p__Bacteroidetes|c__Bacteroidia|o__Bacteroidales|f__Bacteroidaceae|g__GGB1385|s__GGB1385_SGB1890|t__SGB1890
SGB	1891	323	2	kSGB	Species	k__Bacteria|p__Bacteroidetes|c__Bacteroidia|o__Bacteroidales|f__Bacteroidaceae|g__Bacteroides|s__Bacteroides_coprocola|t__SGB1891
SGB	1893	1	0	uSGB	Genus	k__Bacteria|p__Bacteroidetes|c__Bacteroidia|o__Bacteroidales|f__Bacteroidaceae|g__Bacteroides|s__Bacteroides_SGB1893|t__SGB1893
SGB	1894	7	1	kSGB	Species	k__Bacteria|p__Bacteroidetes|c__Bacteroidia|o__Bacteroidales|f__Bacteroidaceae|g__Bacteroides|s__Bacteroides_sp_CAG_1076|t__SGB1894
SGB	1895	69	1	kSGB	Species	k__Bacteria|p__Bacteroidetes|c__Bacteroidia|o__Bacteroidales|f__Bacteroidaceae|g__Bacteroides|s__Bacteroides_sp_CAG_443|t__SGB1895
SGB	1896	2	0	uSGB	Family	k__Bacteria|p__Bacteroidetes|c__Bacteroidia|o__Bacteroidales|f__Bacteroidaceae|g__GGB1388|s__GGB1388_SGB1896|t__SGB1896
SGB	1897	18	1	kSGB	Species	k__Bacteria|p__Bacteroidetes|c__Bacteroidia|o__Bacteroidales|f__Bacteroidaceae|g__Bacteroides|s__Bacteroides_sp_CAG_714|t__SGB1897
SGB	1898	6	0	uSGB	Genus	k__Bacteria|p__Bacteroidetes|c__Bacteroidia|o__Bacteroidales|f__Bacteroidaceae|g__Bacteroides|s__Bacteroides_SGB1898|t__SGB1898
SGB	1899	114	1	kSGB	Species	k__Bacteria|p__Bacteroidetes|c__Bacteroidia|o__Bacteroidales|f__Bacteroidaceae|g__Bacteroides|s__Bacteroides_plebeius|t__SGB1899
SGB	1902	2	0	uSGB	Genus	k__Bacteria|p__Bacteroidetes|c__Bacteroidia|o__Bacteroidales|f__Bacteroidaceae|g__Bacteroides|s__Bacteroides_SGB1902|t__SGB1902
SGB	1903	515	1	kSGB	Species	k__Bacteria|p__Bacteroidetes|c__Bacteroidia|o__Bacteroidales|f__Bacteroidaceae|g__Bacteroides|s__Bacteroides_plebeius_CAG_211|t__SGB1903
SGB	1908	1	0	uSGB	Genus	k__Bacteria|p__Bacteroidetes|c__Bacteroidia|o__Bacteroidales|f__Bacteroidaceae|g__Bacteroides|s__Bacteroides_SGB1908|t__SGB1908
SGB	1909	4	0	uSGB	Genus	k__Bacteria|p__Bacteroidetes|c__Bacteroidia|o__Bacteroidales|f__Bacteroidaceae|g__Bacteroides|s__Bacteroides_SGB1909|t__SGB1909
SGB	1910	42	2	kSGB	Species	k__Bacteria|p__Bacteroidetes|c__Bacteroidia|o__Bacteroidales|f__Bacteroidaceae|g__Bacteroides|s__Bacteroides_sp_CAG_875|t__SGB1910
SGB	1911	5	0	uSGB	Genus	k__Bacteria|p__Bacteroidetes|c__Bacteroidia|o__Bacteroidales|f__Bacteroidaceae|g__Bacteroides|s__Bacteroides_SGB1911|t__SGB1911
SGB	1912	7	0	uSGB	Genus	k__Bacteria|p__Bacteroidetes|c__Bacteroidia|o__Bacteroidales|f__Bacteroidaceae|g__Bacteroides|s__Bacteroides_SGB1912|t__SGB1912
SGB	1913	9	0	uSGB	Family	k__Bacteria|p__Bacteroidetes|c__Bacteroidia|o__Bacteroidales|f__Bacteroidaceae|g__GGB1392|s__GGB1392_SGB1913|t__SGB1913
SGB	1914	9	0	uSGB	Family	k__Bacteria|p__Bacteroidetes|c__Bacteroidia|o__Bacteroidales|f__Bacteroidaceae|g__GGB1393|s__GGB1393_SGB1914|t__SGB1914
SGB	1915	2	1	kSGB	Species	k__Bacteria|p__Bacteroidetes|c__Bacteroidia|o__Bacteroidales|f__Bacteroidaceae|g__Bacteroides|s__Bacteroides_sp_An322|t__SGB1915
SGB	1916	2	1	kSGB	Species	k__Bacteria|p__Bacteroidetes|c__Bacteroidia|o__Bacteroidales|f__Bacteroidaceae|g__Bacteroides|s__Bacteroides_salanitronis|t__SGB1916
SGB	1917	12	5	kSGB	Species	k__Bacteria|p__Bacteroidetes|c__Bacteroidia|o__Bacteroidales|f__Bacteroidaceae|g__Bacteroides|s__Bacteroides_sp_CAG_702|t__SGB1917
SGB	1918	1	0	uSGB	Genus	k__Bacteria|p__Bacteroidetes|c__Bacteroidia|o__Bacteroidales|f__Bacteroidaceae|g__Bacteroides|s__Bacteroides_SGB1918|t__SGB1918
SGB	1919	1	0	uSGB	Family	k__Bacteria|p__Bacteroidetes|c__Bacteroidia|o__Bacteroidales|f__Bacteroidaceae|g__GGB1396|s__GGB1396_SGB1919|t__SGB1919
SGB	1920	0	1	kSGB	Species	k__Bacteria|p__Bacteroidetes|c__Bacteroidia|o__Bacteroidales|f__Bacteroidaceae|g__Mediterranea|s__Mediterranea_sp_An20|t__SGB1920
SGB	1921	1	0	uSGB	Family	k__Bacteria|p__Bacteroidetes|c__Bacteroidia|o__Bacteroidales|f__Bacteroidaceae|g__GGB1398|s__GGB1398_SGB1921|t__SGB1921
SGB	1924	1	1	kSGB	Species	k__Bacteria|p__Bacteroidetes|c__Bacteroidia|o__Bacteroidales|f__Bacteroidaceae|g__Bacteroides|s__Bacteroides_graminisolvens|t__SGB1924
SGB	1926	0	1	kSGB	Species	k__Bacteria|p__Bacteroidetes|c__Bacteroidia|o__Bacteroidales|f__Bacteroidaceae|g__Bacteroides|s__Bacteroides_luti|t__SGB1926
SGB	1927	0	2	kSGB	Species	k__Bacteria|p__Bacteroidetes|c__Bacteroidia|o__Bacteroidales|f__Porphyromonadaceae|g__Macellibacteroides|s__Macellibacteroides_sp_HH_ZS|t__SGB1927
SGB	1928	51	0	uSGB	Family	k__Bacteria|p__Bacteroidetes|c__Bacteroidia|o__Bacteroidales|f__Tannerellaceae|g__GGB1405|s__GGB1405_SGB1928|t__SGB1928
SGB	1929	3	0	uSGB	Family	k__Bacteria|p__Bacteroidetes|c__Bacteroidia|o__Bacteroidales|f__Tannerellaceae|g__GGB1406|s__GGB1406_SGB1929|t__SGB1929
SGB	1930	41	1	kSGB	Species	k__Bacteria|p__Bacteroidetes|c__Bacteroidia|o__Bacteroidales|f__Tannerellaceae|g__Parabacteroides|s__Parabacteroides_sp_CAG_409|t__SGB1930
SGB	1931	11	0	uSGB	Genus	k__Bacteria|p__Bacteroidetes|c__Bacteroidia|o__Bacteroidales|f__Tannerellaceae|g__Parabacteroides|s__Parabacteroides_SGB1931|t__SGB1931
SGB	1932	1	0	uSGB	Genus	k__Bacteria|p__Bacteroidetes|c__Bacteroidia|o__Bacteroidales|f__Tannerellaceae|g__Parabacteroides|s__Parabacteroides_SGB1932|t__SGB1932
SGB	1933	9	0	uSGB	Family	k__Bacteria|p__Bacteroidetes|c__Bacteroidia|o__Bacteroidales|f__Tannerellaceae|g__GGB1408|s__GGB1408_SGB1933|t__SGB1933
SGB	1934	2169	25	kSGB	Species	k__Bacteria|p__Bacteroidetes|c__Bacteroidia|o__Bacteroidales|f__Tannerellaceae|g__Parabacteroides|s__Parabacteroides_distasonis|t__SGB1934
SGB	1935	2	0	uSGB	Family	k__Bacteria|p__Bacteroidetes|c__Bacteroidia|o__Bacteroidales|f__Tannerellaceae|g__GGB1410|s__GGB1410_SGB1935|t__SGB1935
SGB	1936	2	0	uSGB	Family	k__Bacteria|p__Bacteroidetes|c__Bacteroidia|o__Bacteroidales|f__Tannerellaceae|g__GGB1411|s__GGB1411_SGB1936|t__SGB1936
SGB	1937	3	0	uSGB	Family	k__Bacteria|p__Bacteroidetes|c__Bacteroidia|o__Bacteroidales|f__Tannerellaceae|g__GGB1411|s__GGB1411_SGB1937|t__SGB1937
SGB	1938	1	0	uSGB	Family	k__Bacteria|p__Bacteroidetes|c__Bacteroidia|o__Bacteroidales|f__Tannerellaceae|g__GGB1411|s__GGB1411_SGB1938|t__SGB1938
SGB	1939	4	0	uSGB	Family	k__Bacteria|p__Bacteroidetes|c__Bacteroidia|o__Bacteroidales|f__Tannerellaceae|g__GGB1411|s__GGB1411_SGB1939|t__SGB1939
SGB	1940	5	0	uSGB	Family	k__Bacteria|p__Bacteroidetes|c__Bacteroidia|o__Bacteroidales|f__Tannerellaceae|g__GGB1411|s__GGB1411_SGB1940|t__SGB1940
SGB	1941	35	5	kSGB	Species	k__Bacteria|p__Bacteroidetes|c__Bacteroidia|o__Bacteroidales|f__Tannerellaceae|g__Parabacteroides|s__Parabacteroides_goldsteinii|t__SGB1941
SGB	1942	13	2	kSGB	Species	k__Bacteria|p__Bacteroidetes|c__Bacteroidia|o__Bacteroidales|f__Tannerellaceae|g__Parabacteroides|s__Parabacteroides_gordonii|t__SGB1942
SGB	1943	3	0	uSGB	Family	k__Bacteria|p__Bacteroidetes|c__Bacteroidia|o__Bacteroidales|f__Tannerellaceae|g__GGB1414|s__GGB1414_SGB1943|t__SGB1943
SGB	1944	1	0	uSGB	Family	k__Bacteria|p__Bacteroidetes|c__Bacteroidia|o__Bacteroidales|f__Tannerellaceae|g__GGB1414|s__GGB1414_SGB1944|t__SGB1944
SGB	1945	5	0	uSGB	Genus	k__Bacteria|p__Bacteroidetes|c__Bacteroidia|o__Bacteroidales|f__Tannerellaceae|g__Parabacteroides|s__Parabacteroides_SGB1945|t__SGB1945
SGB	1946	5	0	uSGB	Genus	k__Bacteria|p__Bacteroidetes|c__Bacteroidia|o__Bacteroidales|f__Tannerellaceae|g__Parabacteroides|s__Parabacteroides_SGB1946|t__SGB1946
SGB	1947	1	0	uSGB	Genus	k__Bacteria|p__Bacteroidetes|c__Bacteroidia|o__Bacteroidales|f__Tannerellaceae|g__Parabacteroides|s__Parabacteroides_SGB1947|t__SGB1947
SGB	1948	73	4	kSGB	Species	k__Bacteria|p__Bacteroidetes|c__Bacteroidia|o__Bacteroidales|f__Tannerellaceae|g__Parabacteroides|s__Parabacteroides_johnsonii|t__SGB1948
SGB	1949	1008	6	kSGB	Species	k__Bacteria|p__Bacteroidetes|c__Bacteroidia|o__Bacteroidales|f__Tannerellaceae|g__Parabacteroides|s__Parabacteroides_merdae|t__SGB1949
SGB	1950	1	0	uSGB	Genus	k__Bacteria|p__Bacteroidetes|c__Bacteroidia|o__Bacteroidales|f__Tannerellaceae|g__Parabacteroides|s__Parabacteroides_SGB1950|t__SGB1950
SGB	1951	0	1	kSGB	Species	k__Bacteria|p__Bacteroidetes|c__Bacteroidia|o__Bacteroidales|f__Tannerellaceae|g__Parabacteroides|s__Parabacteroides_chinchillae|t__SGB1951
SGB	1953	4	0	uSGB	Other	k__Bacteria|p__Bacteroidetes|c__CFGB601|o__OFGB601|f__FGB601|g__GGB1418|s__GGB1418_SGB1953|t__SGB1953
SGB	1954	2	0	uSGB	Other	k__Bacteria|p__Bacteroidetes|c__CFGB601|o__OFGB601|f__FGB601|g__GGB1418|s__GGB1418_SGB1954|t__SGB1954
SGB	1955	1	0	uSGB	Other	k__Bacteria|p__Bacteroidetes|c__CFGB601|o__OFGB601|f__FGB601|g__GGB1419|s__GGB1419_SGB1955|t__SGB1955
SGB	1956	3	0	uSGB	Genus	k__Bacteria|p__Bacteroidetes|c__Bacteroidia|o__Bacteroidales|f__Bacteroidaceae|g__Bacteroides|s__Bacteroides_SGB1956|t__SGB1956
SGB	1957	140	1	kSGB	Species	k__Bacteria|p__Bacteroidetes|c__Bacteroidia|o__Bacteroidales|f__Bacteroidaceae|g__Bacteroides|s__Bacteroides_sp_CAG_144|t__SGB1957
SGB	1958	2	0	uSGB	Family	k__Bacteria|p__Bacteroidetes|c__Bacteroidia|o__Bacteroidales|f__Bacteroidaceae|g__GGB1421|s__GGB1421_SGB1958|t__SGB1958
SGB	1959	2	0	uSGB	Family	k__Bacteria|p__Bacteroidetes|c__Bacteroidia|o__Bacteroidales|f__Bacteroidaceae|g__GGB1421|s__GGB1421_SGB1959|t__SGB1959
SGB	1960	2	0	uSGB	Family	k__Bacteria|p__Bacteroidetes|c__Bacteroidia|o__Bacteroidales|f__Bacteroidaceae|g__GGB1421|s__GGB1421_SGB1960|t__SGB1960
SGB	1961	9	0	uSGB	Other	k__Bacteria|p__Bacteroidetes|c__CFGB603|o__OFGB603|f__FGB603|g__GGB1422|s__GGB1422_SGB1961|t__SGB1961
SGB	1962	6	2	kSGB	Species	k__Bacteria|p__Bacteroidetes|c__Bacteroidia|o__Bacteroidales|f__Tannerellaceae|g__Tannerella|s__Tannerella_sp_CAG_118|t__SGB1962
SGB	1963	119	3	kSGB	Species	k__Bacteria|p__Bacteroidetes|c__Bacteroidia|o__Bacteroidales|f__Tannerellaceae|g__Tannerella|s__Tannerella_sp_6_1_58FAA_CT1|t__SGB1963
SGB	1964	7	0	uSGB	Family	k__Bacteria|p__Bacteroidetes|c__Bacteroidia|o__Bacteroidales|f__Barnesiellaceae|g__GGB1425|s__GGB1425_SGB1964|t__SGB1964
SGB	1965	1432	2	kSGB	Species	k__Bacteria|p__Bacteroidetes|c__Bacteroidia|o__Bacteroidales|f__Barnesiellaceae|g__Barnesiella|s__Barnesiella_intestinihominis|t__SGB1965
SGB	1966	0	1	kSGB	Species	k__Bacteria|p__Bacteroidetes|c__Bacteroidia|o__Bacteroidales|f__Barnesiellaceae|g__Barnesiella|s__Barnesiella_viscericola|t__SGB1966
SGB	1967	7	1	kSGB	Species	k__Bacteria|p__Bacteroidetes|c__Bacteroidia|o__Bacteroidales|f__Barnesiellaceae|g__Barnesiella|s__Barnesiella_sp_An22|t__SGB1967
SGB	1968	0	1	kSGB	Species	k__Bacteria|p__Bacteroidetes|c__Bacteroidia|o__Bacteroidales|f__Barnesiellaceae|g__Barnesiella|s__Barnesiella_sp_An55|t__SGB1968
SGB	1969	1	0	uSGB	Other	k__Bacteria|p__Firmicutes|c__CFGB606|o__OFGB606|f__FGB606|g__GGB1428|s__GGB1428_SGB1969|t__SGB1969
SGB	1972	2	0	uSGB	Family	k__Bacteria|p__Bacteroidetes|c__Bacteroidia|o__Bacteroidales|f__Porphyromonadaceae|g__GGB1431|s__GGB1431_SGB1972|t__SGB1972
SGB	1973	4	1	kSGB	Species	k__Bacteria|p__Bacteroidetes|c__Bacteroidia|o__Bacteroidales|f__Porphyromonadaceae|g__Porphyromonas|s__Porphyromonas_uenonis|t__SGB1973
SGB	1974	6	0	uSGB	Genus	k__Bacteria|p__Bacteroidetes|c__Bacteroidia|o__Bacteroidales|f__Porphyromonadaceae|g__Porphyromonas|s__Porphyromonas_SGB1974|t__SGB1974
SGB	1975	1	0	uSGB	Genus	k__Bacteria|p__Bacteroidetes|c__Bacteroidia|o__Bacteroidales|f__Porphyromonadaceae|g__Porphyromonas|s__Porphyromonas_SGB1975|t__SGB1975
SGB	1976	2	0	uSGB	Genus	k__Bacteria|p__Bacteroidetes|c__Bacteroidia|o__Bacteroidales|f__Porphyromonadaceae|g__Porphyromonas|s__Porphyromonas_SGB1976|t__SGB1976
SGB	1977	13	0	uSGB	Genus	k__Bacteria|p__Bacteroidetes|c__Bacteroidia|o__Bacteroidales|f__Porphyromonadaceae|g__Porphyromonas|s__Porphyromonas_SGB1977|t__SGB1977
SGB	1978	1	0	uSGB	Genus	k__Bacteria|p__Bacteroidetes|c__Bacteroidia|o__Bacteroidales|f__Porphyromonadaceae|g__Porphyromonas|s__Porphyromonas_SGB1978|t__SGB1978
SGB	1979	4	0	uSGB	Genus	k__Bacteria|p__Bacteroidetes|c__Bacteroidia|o__Bacteroidales|f__Porphyromonadaceae|g__Porphyromonas|s__Porphyromonas_SGB1979|t__SGB1979
SGB	1980	10	0	uSGB	Genus	k__Bacteria|p__Bacteroidetes|c__Bacteroidia|o__Bacteroidales|f__Porphyromonadaceae|g__Porphyromonas|s__Porphyromonas_SGB1980|t__SGB1980
SGB	1981	7	2	kSGB	Species	k__Bacteria|p__Bacteroidetes|c__Bacteroidia|o__Bacteroidales|f__Porphyromonadaceae|g__Porphyromonas|s__Porphyromonas_asaccharolytica|t__SGB1981
SGB	1982	9	0	uSGB	Genus	k__Bacteria|p__Bacteroidetes|c__Bacteroidia|o__Bacteroidales|f__Porphyromonadaceae|g__Porphyromonas|s__Porphyromonas_SGB1982|t__SGB1982
SGB	1983	6	0	uSGB	Genus	k__Bacteria|p__Bacteroidetes|c__Bacteroidia|o__Bacteroidales|f__Porphyromonadaceae|g__Porphyromonas|s__Porphyromonas_SGB1983|t__SGB1983
SGB	1984	6	0	uSGB	Genus	k__Bacteria|p__Bacteroidetes|c__Bacteroidia|o__Bacteroidales|f__Porphyromonadaceae|g__Porphyromonas|s__Porphyromonas_SGB1984|t__SGB1984
SGB	1985	11	0	uSGB	Genus	k__Bacteria|p__Bacteroidetes|c__Bacteroidia|o__Bacteroidales|f__Porphyromonadaceae|g__Porphyromonas|s__Porphyromonas_SGB1985|t__SGB1985
SGB	1986	2	0	uSGB	Genus	k__Bacteria|p__Bacteroidetes|c__Bacteroidia|o__Bacteroidales|f__Porphyromonadaceae|g__Porphyromonas|s__Porphyromonas_SGB1986|t__SGB1986
SGB	1988	2	0	uSGB	Genus	k__Bacteria|p__Bacteroidetes|c__Bacteroidia|o__Bacteroidales|f__Porphyromonadaceae|g__Porphyromonas|s__Porphyromonas_SGB1988|t__SGB1988
SGB	1989	7	0	uSGB	Genus	k__Bacteria|p__Bacteroidetes|c__Bacteroidia|o__Bacteroidales|f__Porphyromonadaceae|g__Porphyromonas|s__Porphyromonas_SGB1989|t__SGB1989
SGB	1990	7	1	kSGB	Species	k__Bacteria|p__Bacteroidetes|c__Bacteroidia|o__Bacteroidales|f__Porphyromonadaceae|g__Porphyromonas|s__Porphyromonas_sp_HMSC065F10|t__SGB1990
SGB	1991	13	2	kSGB	Species	k__Bacteria|p__Bacteroidetes|c__Bacteroidia|o__Bacteroidales|f__Porphyromonadaceae|g__Porphyromonas|s__Porphyromonas_sp_CAG_1061|t__SGB1991
SGB	1992	1	0	uSGB	Genus	k__Bacteria|p__Bacteroidetes|c__Bacteroidia|o__Bacteroidales|f__Porphyromonadaceae|g__Porphyromonas|s__Porphyromonas_SGB1992|t__SGB1992
SGB	1995	0	1	kSGB	Species	k__Bacteria|p__Bacteroidetes|c__Bacteroidia|o__Bacteroidales|f__Dysgonamonadaceae|g__Dysgonamonadaceae_unclassified|s__Dysgonamonadaceae_bacterium|t__SGB1995
SGB	1999	0	1	kSGB	Species	k__Bacteria|p__Bacteroidetes|c__Bacteroidia|o__Bacteroidales|f__Porphyromonadaceae|g__Fermentimonas|s__Fermentimonas_caenicola|t__SGB1999
SGB	2003	0	2	kSGB	Species	k__Bacteria|p__Bacteroidetes|c__Bacteroidetes_unclassified|o__Bacteroidetes_unclassified|f__Bacteroidetes_unclassified|g__Bacteroidetes_unclassified|s__Bacteroidetes_bacterium_GWC2_46_850|t__SGB2003
SGB	2008	0	2	kSGB	Species	k__Bacteria|p__Bacteroidetes|c__Bacteroidia|o__Bacteroidales|f__Porphyromonadaceae|g__Petrimonas|s__Petrimonas_mucosa|t__SGB2008
SGB	2009	0	3	kSGB	Species	k__Bacteria|p__Bacteroidetes|c__Bacteroidia|o__Bacteroidales|f__Dysgonamonadaceae|g__Proteiniphilum|s__Proteiniphilum_saccharofermentans|t__SGB2009
SGB	2010	0	1	kSGB	Species	k__Bacteria|p__Bacteroidetes|c__Bacteroidia|o__Bacteroidales|f__Porphyromonadaceae|g__Porphyromonadaceae_unclassified|s__Porphyromonadaceae_bacterium_KH3CP3RA|t__SGB2010
SGB	2015	4	0	uSGB	Genus	k__Bacteria|p__Bacteroidetes|c__Bacteroidia|o__Bacteroidales|f__Porphyromonadaceae|g__Porphyromonas|s__Porphyromonas_SGB2015|t__SGB2015
SGB	2016	31	1	kSGB	Species	k__Bacteria|p__Bacteroidetes|c__Bacteroidia|o__Bacteroidales|f__Porphyromonadaceae|g__Porphyromonas|s__Porphyromonas_endodontalis|t__SGB2016
SGB	2018	7	0	uSGB	Other	k__Bacteria|p__Bacteroidetes|c__CFGB618|o__OFGB618|f__FGB618|g__GGB1455|s__GGB1455_SGB2018|t__SGB2018
SGB	2019	18	0	uSGB	Other	k__Bacteria|p__Bacteroidetes|c__CFGB618|o__OFGB618|f__FGB618|g__GGB1456|s__GGB1456_SGB2019|t__SGB2019
SGB	2020	5	0	uSGB	Other	k__Bacteria|p__Bacteroidetes|c__CFGB619|o__OFGB619|f__FGB619|g__GGB1457|s__GGB1457_SGB2020|t__SGB2020
SGB	2021	177	0	uSGB	Other	k__Bacteria|p__Bacteroidetes|c__CFGB619|o__OFGB619|f__FGB619|g__GGB1458|s__GGB1458_SGB2021|t__SGB2021
SGB	2023	3	0	uSGB	Other	k__Bacteria|p__Chlamydiae|c__CFGB620|o__OFGB620|f__FGB620|g__GGB1460|s__GGB1460_SGB2023|t__SGB2023
SGB	2024	5	0	uSGB	Other	k__Bacteria|p__Bacteroidetes|c__CFGB620|o__OFGB620|f__FGB620|g__GGB1461|s__GGB1461_SGB2024|t__SGB2024
SGB	2025	2	0	uSGB	Other	k__Bacteria|p__Bacteroidetes|c__CFGB620|o__OFGB620|f__FGB620|g__GGB1462|s__GGB1462_SGB2025|t__SGB2025
SGB	2036	45	2	kSGB	Species	k__Bacteria|p__Bacteroidetes|c__Bacteroidia|o__Bacteroidales|f__Porphyromonadaceae|g__Porphyromonas|s__Porphyromonas_catoniae|t__SGB2036
SGB	2037	35	0	uSGB	Family	k__Bacteria|p__Bacteroidetes|c__Bacteroidia|o__Bacteroidales|f__Porphyromonadaceae|g__GGB1472|s__GGB1472_SGB2037|t__SGB2037
SGB	2038	16	0	uSGB	Family	k__Bacteria|p__Bacteroidetes|c__Bacteroidia|o__Bacteroidales|f__Porphyromonadaceae|g__GGB1472|s__GGB1472_SGB2038|t__SGB2038
SGB	2039	2	0	uSGB	Family	k__Bacteria|p__Bacteroidetes|c__Bacteroidia|o__Bacteroidales|f__Porphyromonadaceae|g__GGB1473|s__GGB1473_SGB2039|t__SGB2039
SGB	2040	4	0	uSGB	Family	k__Bacteria|p__Bacteroidetes|c__Bacteroidia|o__Bacteroidales|f__Porphyromonadaceae|g__GGB1474|s__GGB1474_SGB2040|t__SGB2040
SGB	2041	15	1	kSGB	Species	k__Bacteria|p__Bacteroidetes|c__Bacteroidia|o__Bacteroidales|f__Porphyromonadaceae|g__Porphyromonas|s__Porphyromonas_sp_oral_taxon_278|t__SGB2041
SGB	2042	6	0	uSGB	Genus	k__Bacteria|p__Bacteroidetes|c__Bacteroidia|o__Bacteroidales|f__Porphyromonadaceae|g__Porphyromonas|s__Porphyromonas_SGB2042|t__SGB2042
SGB	2043	215	4	kSGB	Species	k__Bacteria|p__Bacteroidetes|c__Bacteroidia|o__Bacteroidales|f__Porphyromonadaceae|g__Porphyromonas|s__Porphyromonas_sp_oral_taxon_279|t__SGB2043
SGB	2044	3	0	uSGB	Genus	k__Bacteria|p__Bacteroidetes|c__Bacteroidia|o__Bacteroidales|f__Porphyromonadaceae|g__Porphyromonas|s__Porphyromonas_SGB2044|t__SGB2044
SGB	2047	0	3	kSGB	Species	k__Bacteria|p__Bacteroidetes|c__Bacteroidia|o__Bacteroidales|f__Tannerellaceae|g__Tannerella|s__Tannerella_sp_oral_taxon_808|t__SGB2047
SGB	2048	44	5	kSGB	Species	k__Bacteria|p__Bacteroidetes|c__Bacteroidia|o__Bacteroidales|f__Tannerellaceae|g__Tannerella|s__Tannerella_sp_oral_taxon_HOT_286|t__SGB2048
SGB	2049	1	0	uSGB	Genus	k__Bacteria|p__Bacteroidetes|c__Bacteroidia|o__Bacteroidales|f__Tannerellaceae|g__Tannerella|s__Tannerella_SGB2049|t__SGB2049
SGB	2050	0	3	kSGB	Species	k__Bacteria|p__Bacteroidetes|c__Bacteroidia|o__Bacteroidales|f__Bacteroidales_unclassified|g__Bacteroidales_unclassified|s__Bacteroidales_bacterium_Barb4|t__SGB2050
SGB	2051	0	1	kSGB	Species	k__Bacteria|p__Bacteroidetes|c__Bacteroidia|o__Bacteroidales|f__Bacteroidales_unclassified|g__Bacteroidales_unclassified|s__Bacteroidales_bacterium_Barb7|t__SGB2051
SGB	2052	1	1	kSGB	Species	k__Bacteria|p__Bacteroidetes|c__Bacteroidetes_unclassified|o__Bacteroidetes_unclassified|f__Bacteroidetes_unclassified|g__Bacteroidetes_unclassified|s__Bacteroidetes_bacterium_oral_taxon_272|t__SGB2052
SGB	2053	14	10	kSGB	Species	k__Bacteria|p__Bacteroidetes|c__Bacteroidia|o__Bacteroidales|f__Tannerellaceae|g__Tannerella|s__Tannerella_forsythia|t__SGB2053
SGB	2054	1	0	uSGB	Genus	k__Bacteria|p__Bacteroidetes|c__Bacteroidia|o__Bacteroidales|f__Tannerellaceae|g__Tannerella|s__Tannerella_SGB2054|t__SGB2054
SGB	2055	0	2	kSGB	Species	k__Bacteria|p__Bacteroidetes|c__Bacteroidia|o__Bacteroidales|f__Porphyromonadaceae|g__Porphyromonas|s__Porphyromonas_macacae|t__SGB2055
SGB	2056	0	12	kSGB	Species	k__Bacteria|p__Bacteroidetes|c__Bacteroidia|o__Bacteroidales|f__Porphyromonadaceae|g__Porphyromonas|s__Porphyromonas_gulae|t__SGB2056
SGB	2057	14	62	kSGB	Species	k__Bacteria|p__Bacteroidetes|c__Bacteroidia|o__Bacteroidales|f__Porphyromonadaceae|g__Porphyromonas|s__Porphyromonas_gingivalis|t__SGB2057
SGB	2058	0	2	kSGB	Species	k__Bacteria|p__Bacteroidetes|c__Bacteroidia|o__Bacteroidales|f__Porphyromonadaceae|g__Porphyromonas|s__Porphyromonas_sp_COT_290_OH860|t__SGB2058
SGB	2059	0	1	kSGB	Species	k__Bacteria|p__Bacteroidetes|c__Bacteroidia|o__Bacteroidales|f__Porphyromonadaceae|g__Porphyromonas|s__Porphyromonas_sp_COT_239_OH1446|t__SGB2059
SGB	2060	0	3	kSGB	Species	k__Bacteria|p__Bacteroidetes|c__Bacteroidia|o__Bacteroidales|f__Porphyromonadaceae|g__Porphyromonas|s__Porphyromonas_cangingivalis|t__SGB2060
SGB	2061	0	4	kSGB	Species	k__Bacteria|p__Bacteroidetes|c__Bacteroidia|o__Bacteroidales|f__Porphyromonadaceae|g__Porphyromonas|s__Porphyromonas_canoris|t__SGB2061
SGB	2062	0	5	kSGB	Species	k__Bacteria|p__Bacteroidetes|c__Bacteroidia|o__Bacteroidales|f__Porphyromonadaceae|g__Porphyromonas|s__Porphyromonas_crevioricanis|t__SGB2062
SGB	2063	0	1	kSGB	Species	k__Bacteria|p__Bacteroidetes|c__Bacteroidia|o__Bacteroidales|f__Porphyromonadaceae|g__Porphyromonas|s__Porphyromonas_gingivicanis|t__SGB2063
SGB	2064	0	1	kSGB	Species	k__Bacteria|p__Bacteroidetes|c__Bacteroidia|o__Bacteroidales|f__Porphyromonadaceae|g__Porphyromonas|s__Porphyromonas_circumdentaria|t__SGB2064
SGB	2065	1	0	uSGB	Other	k__Bacteria|p__Bacteroidetes|c__CFGB627|o__OFGB627|f__FGB627|g__GGB1490|s__GGB1490_SGB2065|t__SGB2065
SGB	2066	1	0	uSGB	Other	k__Bacteria|p__Bacteroidetes|c__CFGB627|o__OFGB627|f__FGB627|g__GGB1491|s__GGB1491_SGB2066|t__SGB2066
SGB	2067	3	0	uSGB	Other	k__Bacteria|p__Bacteroidetes|c__CFGB628|o__OFGB628|f__FGB628|g__GGB1492|s__GGB1492_SGB2067|t__SGB2067
SGB	2068	4	0	uSGB	Family	k__Bacteria|p__Bacteroidetes|c__Bacteroidia|o__Bacteroidales|f__Prevotellaceae|g__GGB1493|s__GGB1493_SGB2068|t__SGB2068
SGB	2069	4	0	uSGB	Family	k__Bacteria|p__Bacteroidetes|c__Bacteroidia|o__Bacteroidales|f__Prevotellaceae|g__GGB1494|s__GGB1494_SGB2069|t__SGB2069
SGB	2070	1	0	uSGB	Family	k__Bacteria|p__Bacteroidetes|c__Bacteroidia|o__Bacteroidales|f__Prevotellaceae|g__GGB1494|s__GGB1494_SGB2070|t__SGB2070
SGB	2071	540	1	kSGB	Species	k__Bacteria|p__Bacteroidetes|c__Bacteroidia|o__Bacteroidales|f__Prevotellaceae|g__Prevotella|s__Prevotella_sp_CAG_279|t__SGB2071
SGB	2072	4	0	uSGB	Family	k__Bacteria|p__Bacteroidetes|c__Bacteroidia|o__Bacteroidales|f__Prevotellaceae|g__GGB1496|s__GGB1496_SGB2072|t__SGB2072
SGB	2073	16	0	uSGB	Family	k__Bacteria|p__Bacteroidetes|c__Bacteroidia|o__Bacteroidales|f__Prevotellaceae|g__GGB1496|s__GGB1496_SGB2073|t__SGB2073
SGB	2075	4	0	uSGB	Genus	k__Bacteria|p__Bacteroidetes|c__Bacteroidia|o__Bacteroidales|f__Prevotellaceae|g__Prevotella|s__Prevotella_SGB2075|t__SGB2075
SGB	2076	78	1	kSGB	Species	k__Bacteria|p__Bacteroidetes|c__Bacteroidia|o__Bacteroidales|f__Prevotellaceae|g__Prevotella|s__Prevotella_sp_CAG_873|t__SGB2076
SGB	2077	1	0	uSGB	Other	k__Bacteria|p__Bacteroidetes|c__CFGB631|o__OFGB631|f__FGB631|g__GGB1498|s__GGB1498_SGB2077|t__SGB2077
SGB	2080	1	0	uSGB	Other	k__Bacteria|p__Bacteroidetes|c__CFGB632|o__OFGB632|f__FGB632|g__GGB1501|s__GGB1501_SGB2080|t__SGB2080
SGB	2082	2	0	uSGB	Other	k__Bacteria|p__Bacteroidetes|c__CFGB633|o__OFGB633|f__FGB633|g__GGB1503|s__GGB1503_SGB2082|t__SGB2082
SGB	2083	1	0	uSGB	Other	k__Bacteria|p__Bacteroidetes|c__CFGB633|o__OFGB633|f__FGB633|g__GGB1503|s__GGB1503_SGB2083|t__SGB2083
SGB	2084	2	0	uSGB	Family	k__Bacteria|p__Bacteroidetes|c__Bacteroidia|o__Bacteroidales|f__Bacteroidaceae|g__GGB1504|s__GGB1504_SGB2084|t__SGB2084
SGB	2085	11	0	uSGB	Family	k__Bacteria|p__Bacteroidetes|c__Bacteroidia|o__Bacteroidales|f__Bacteroidaceae|g__GGB1505|s__GGB1505_SGB2085|t__SGB2085
SGB	2087	12	0	uSGB	Family	k__Bacteria|p__Bacteroidetes|c__Bacteroidia|o__Bacteroidales|f__Bacteroidaceae|g__GGB1507|s__GGB1507_SGB2087|t__SGB2087
SGB	2088	0	1	kSGB	Species	k__Bacteria|p__Bacteroidetes|c__Bacteroidia|o__Bacteroidales|f__Muribaculaceae|g__Muribaculum|s__Muribaculum_intestinale|t__SGB2088
SGB	2089	2	0	uSGB	Family	k__Bacteria|p__Bacteroidetes|c__Bacteroidia|o__Bacteroidales|f__Bacteroidaceae|g__GGB1509|s__GGB1509_SGB2089|t__SGB2089
SGB	2090	2	0	uSGB	Family	k__Bacteria|p__Bacteroidetes|c__Bacteroidia|o__Bacteroidales|f__Bacteroidaceae|g__GGB1510|s__GGB1510_SGB2090|t__SGB2090
SGB	2091	29	1	kSGB	Species	k__Bacteria|p__Bacteroidetes|c__Bacteroidia|o__Bacteroidales|f__Bacteroidaceae|g__Bacteroides|s__Bacteroides_sp_CAG_927|t__SGB2091
SGB	2092	7	0	uSGB	Family	k__Bacteria|p__Bacteroidetes|c__Bacteroidia|o__Bacteroidales|f__Bacteroidaceae|g__GGB1512|s__GGB1512_SGB2092|t__SGB2092
SGB	2093	1	0	uSGB	Family	k__Bacteria|p__Bacteroidetes|c__Bacteroidia|o__Bacteroidales|f__Bacteroidaceae|g__GGB1513|s__GGB1513_SGB2093|t__SGB2093
SGB	2094	3	0	uSGB	Family	k__Bacteria|p__Bacteroidetes|c__Bacteroidia|o__Bacteroidales|f__Prevotellaceae|g__GGB1514|s__GGB1514_SGB2094|t__SGB2094
SGB	2095	7	0	uSGB	Family	k__Bacteria|p__Bacteroidetes|c__Bacteroidia|o__Bacteroidales|f__Prevotellaceae|g__GGB1515|s__GGB1515_SGB2095|t__SGB2095
SGB	2097	2	0	uSGB	Family	k__Bacteria|p__Bacteroidetes|c__Bacteroidia|o__Bacteroidales|f__Prevotellaceae|g__GGB1517|s__GGB1517_SGB2097|t__SGB2097
SGB	2098	1	0	uSGB	Family	k__Bacteria|p__Bacteroidetes|c__Bacteroidia|o__Bacteroidales|f__Prevotellaceae|g__GGB1517|s__GGB1517_SGB2098|t__SGB2098
SGB	2099	1	0	uSGB	Family	k__Bacteria|p__Bacteroidetes|c__Bacteroidia|o__Bacteroidales|f__Prevotellaceae|g__GGB1518|s__GGB1518_SGB2099|t__SGB2099
SGB	2100	1	0	uSGB	Family	k__Bacteria|p__Bacteroidetes|c__Bacteroidia|o__Bacteroidales|f__Prevotellaceae|g__GGB1518|s__GGB1518_SGB2100|t__SGB2100
SGB	2101	1	0	uSGB	Family	k__Bacteria|p__Bacteroidetes|c__Bacteroidia|o__Bacteroidales|f__Prevotellaceae|g__GGB1519|s__GGB1519_SGB2101|t__SGB2101
SGB	2103	4	0	uSGB	Family	k__Bacteria|p__Bacteroidetes|c__Bacteroidia|o__Bacteroidales|f__Prevotellaceae|g__GGB1521|s__GGB1521_SGB2103|t__SGB2103
SGB	2104	1	0	uSGB	Family	k__Bacteria|p__Bacteroidetes|c__Bacteroidia|o__Bacteroidales|f__Prevotellaceae|g__GGB1522|s__GGB1522_SGB2104|t__SGB2104
SGB	2105	1	0	uSGB	Family	k__Bacteria|p__Bacteroidetes|c__Bacteroidia|o__Bacteroidales|f__Prevotellaceae|g__GGB1523|s__GGB1523_SGB2105|t__SGB2105
SGB	2106	1	0	uSGB	Family	k__Bacteria|p__Bacteroidetes|c__Bacteroidia|o__Bacteroidales|f__Prevotellaceae|g__GGB1524|s__GGB1524_SGB2106|t__SGB2106
SGB	2107	4	0	uSGB	Family	k__Bacteria|p__Bacteroidetes|c__Bacteroidia|o__Bacteroidales|f__Prevotellaceae|g__GGB1525|s__GGB1525_SGB2107|t__SGB2107
SGB	2108	2	0	uSGB	Family	k__Bacteria|p__Bacteroidetes|c__Bacteroidia|o__Bacteroidales|f__Prevotellaceae|g__GGB1526|s__GGB1526_SGB2108|t__SGB2108
SGB	2109	1	0	uSGB	Family	k__Bacteria|p__Bacteroidetes|c__Bacteroidia|o__Bacteroidales|f__Prevotellaceae|g__GGB1526|s__GGB1526_SGB2109|t__SGB2109
SGB	2110	1	0	uSGB	Family	k__Bacteria|p__Bacteroidetes|c__Bacteroidia|o__Bacteroidales|f__Prevotellaceae|g__GGB1527|s__GGB1527_SGB2110|t__SGB2110
SGB	2111	6	0	uSGB	Family	k__Bacteria|p__Bacteroidetes|c__Bacteroidia|o__Bacteroidales|f__Prevotellaceae|g__GGB1528|s__GGB1528_SGB2111|t__SGB2111
SGB	2112	3	0	uSGB	Family	k__Bacteria|p__Bacteroidetes|c__Bacteroidia|o__Bacteroidales|f__Prevotellaceae|g__GGB1529|s__GGB1529_SGB2112|t__SGB2112
SGB	2113	1	0	uSGB	Family	k__Bacteria|p__Bacteroidetes|c__Bacteroidia|o__Bacteroidales|f__Prevotellaceae|g__GGB1530|s__GGB1530_SGB2113|t__SGB2113
SGB	2114	1	0	uSGB	Family	k__Bacteria|p__Bacteroidetes|c__Bacteroidia|o__Bacteroidales|f__Prevotellaceae|g__GGB1531|s__GGB1531_SGB2114|t__SGB2114
SGB	2115	1	0	uSGB	Family	k__Bacteria|p__Bacteroidetes|c__Bacteroidia|o__Bacteroidales|f__Prevotellaceae|g__GGB1532|s__GGB1532_SGB2115|t__SGB2115
SGB	2116	1	0	uSGB	Family	k__Bacteria|p__Bacteroidetes|c__Bacteroidia|o__Bacteroidales|f__Prevotellaceae|g__GGB1533|s__GGB1533_SGB2116|t__SGB2116
SGB	2118	6	0	uSGB	Family	k__Bacteria|p__Bacteroidetes|c__Bacteroidia|o__Bacteroidales|f__Prevotellaceae|g__GGB1535|s__GGB1535_SGB2118|t__SGB2118
SGB	2119	7	0	uSGB	Family	k__Bacteria|p__Bacteroidetes|c__Bacteroidia|o__Bacteroidales|f__Prevotellaceae|g__GGB1536|s__GGB1536_SGB2119|t__SGB2119
SGB	2120	1	0	uSGB	Family	k__Bacteria|p__Bacteroidetes|c__Bacteroidia|o__Bacteroidales|f__Prevotellaceae|g__GGB1537|s__GGB1537_SGB2120|t__SGB2120
SGB	2121	48	1	kSGB	Species	k__Bacteria|p__Bacteroidetes|c__Bacteroidia|o__Bacteroidales|f__Prevotellaceae|g__Prevotella|s__Prevotella_sp_CAG_1031|t__SGB2121
SGB	2122	1	0	uSGB	Family	k__Bacteria|p__Bacteroidetes|c__Bacteroidia|o__Bacteroidales|f__Prevotellaceae|g__GGB1539|s__GGB1539_SGB2122|t__SGB2122
SGB	2124	15	0	uSGB	Family	k__Bacteria|p__Bacteroidetes|c__Bacteroidia|o__Bacteroidales|f__Prevotellaceae|g__GGB1541|s__GGB1541_SGB2124|t__SGB2124
SGB	2125	1	0	uSGB	Family	k__Bacteria|p__Bacteroidetes|c__Bacteroidia|o__Bacteroidales|f__Prevotellaceae|g__GGB1542|s__GGB1542_SGB2125|t__SGB2125
SGB	2126	13	0	uSGB	Family	k__Bacteria|p__Bacteroidetes|c__Bacteroidia|o__Bacteroidales|f__Prevotellaceae|g__GGB1543|s__GGB1543_SGB2126|t__SGB2126
SGB	2127	5	0	uSGB	Family	k__Bacteria|p__Bacteroidetes|c__Bacteroidia|o__Bacteroidales|f__Prevotellaceae|g__GGB1544|s__GGB1544_SGB2127|t__SGB2127
SGB	2128	1	0	uSGB	Family	k__Bacteria|p__Bacteroidetes|c__Bacteroidia|o__Bacteroidales|f__Prevotellaceae|g__GGB1545|s__GGB1545_SGB2128|t__SGB2128
SGB	2129	1	0	uSGB	Family	k__Bacteria|p__Bacteroidetes|c__Bacteroidia|o__Bacteroidales|f__Prevotellaceae|g__GGB1545|s__GGB1545_SGB2129|t__SGB2129
SGB	2131	3	0	uSGB	Family	k__Bacteria|p__Bacteroidetes|c__Bacteroidia|o__Bacteroidales|f__Prevotellaceae|g__GGB1547|s__GGB1547_SGB2131|t__SGB2131
SGB	2132	5	0	uSGB	Family	k__Bacteria|p__Bacteroidetes|c__Bacteroidia|o__Bacteroidales|f__Prevotellaceae|g__GGB1548|s__GGB1548_SGB2132|t__SGB2132
SGB	2133	12	0	uSGB	Family	k__Bacteria|p__Bacteroidetes|c__Bacteroidia|o__Bacteroidales|f__Prevotellaceae|g__GGB1549|s__GGB1549_SGB2133|t__SGB2133
SGB	2134	48	0	uSGB	Family	k__Bacteria|p__Bacteroidetes|c__Bacteroidia|o__Bacteroidales|f__Prevotellaceae|g__GGB1550|s__GGB1550_SGB2134|t__SGB2134
SGB	2135	36	0	uSGB	Family	k__Bacteria|p__Bacteroidetes|c__Bacteroidia|o__Bacteroidales|f__Prevotellaceae|g__GGB1550|s__GGB1550_SGB2135|t__SGB2135
SGB	2136	5	0	uSGB	Family	k__Bacteria|p__Bacteroidetes|c__Bacteroidia|o__Bacteroidales|f__Prevotellaceae|g__GGB1551|s__GGB1551_SGB2136|t__SGB2136
SGB	2137	1	0	uSGB	Family	k__Bacteria|p__Bacteroidetes|c__Bacteroidia|o__Bacteroidales|f__Prevotellaceae|g__GGB1551|s__GGB1551_SGB2137|t__SGB2137
SGB	2138	2	0	uSGB	Family	k__Bacteria|p__Bacteroidetes|c__Bacteroidia|o__Bacteroidales|f__Prevotellaceae|g__GGB1552|s__GGB1552_SGB2138|t__SGB2138
SGB	2139	1	0	uSGB	Family	k__Bacteria|p__Bacteroidetes|c__Bacteroidia|o__Bacteroidales|f__Prevotellaceae|g__GGB1553|s__GGB1553_SGB2139|t__SGB2139
SGB	2140	1	0	uSGB	Family	k__Bacteria|p__Bacteroidetes|c__Bacteroidia|o__Bacteroidales|f__Prevotellaceae|g__GGB1553|s__GGB1553_SGB2140|t__SGB2140
SGB	2141	8	0	uSGB	Other	k__Bacteria|p__Bacteroidetes|c__CFGB636|o__OFGB636|f__FGB636|g__GGB1554|s__GGB1554_SGB2141|t__SGB2141
SGB	2142	1	0	uSGB	Other	k__Bacteria|p__Bacteroidetes|c__CFGB636|o__OFGB636|f__FGB636|g__GGB1555|s__GGB1555_SGB2142|t__SGB2142
SGB	2143	3	0	uSGB	Other	k__Bacteria|p__Bacteroidetes|c__CFGB637|o__OFGB637|f__FGB637|g__GGB1556|s__GGB1556_SGB2143|t__SGB2143
SGB	2145	2	0	uSGB	Other	k__Bacteria|p__Bacteroidetes|c__CFGB637|o__OFGB637|f__FGB637|g__GGB1558|s__GGB1558_SGB2145|t__SGB2145
SGB	2146	1	0	uSGB	Other	k__Bacteria|p__Firmicutes|c__CFGB637|o__OFGB637|f__FGB637|g__GGB1559|s__GGB1559_SGB2146|t__SGB2146
SGB	2148	2	0	uSGB	Other	k__Bacteria|p__Bacteroidetes|c__CFGB637|o__OFGB637|f__FGB637|g__GGB1561|s__GGB1561_SGB2148|t__SGB2148
SGB	2149	1	0	uSGB	Other	k__Bacteria|p__Bacteroidetes|c__CFGB637|o__OFGB637|f__FGB637|g__GGB1562|s__GGB1562_SGB2149|t__SGB2149
SGB	2153	4	0	uSGB	Other	k__Bacteria|p__Bacteroidetes|c__CFGB640|o__OFGB640|f__FGB640|g__GGB1566|s__GGB1566_SGB2153|t__SGB2153
SGB	2154	25	1	kSGB	Species	k__Bacteria|p__Bacteroidetes|c__Bacteroidia|o__Bacteroidales|f__Prevotellaceae|g__Prevotella|s__Prevotella_sp_CAG_485|t__SGB2154
SGB	2155	15	0	uSGB	Family	k__Bacteria|p__Bacteroidetes|c__Bacteroidia|o__Bacteroidales|f__Prevotellaceae|g__GGB1568|s__GGB1568_SGB2155|t__SGB2155
SGB	2156	1	0	uSGB	Family	k__Bacteria|p__Bacteroidetes|c__Bacteroidia|o__Bacteroidales|f__Prevotellaceae|g__GGB1569|s__GGB1569_SGB2156|t__SGB2156
SGB	2158	3	0	uSGB	Other	k__Bacteria|p__Bacteroidetes|c__CFGB642|o__OFGB642|f__FGB642|g__GGB1571|s__GGB1571_SGB2158|t__SGB2158
SGB	2159	2	0	uSGB	Other	k__Bacteria|p__Bacteroidetes|c__CFGB642|o__OFGB642|f__FGB642|g__GGB1572|s__GGB1572_SGB2159|t__SGB2159
SGB	2160	2	0	uSGB	Other	k__Bacteria|p__Bacteroidetes|c__CFGB642|o__OFGB642|f__FGB642|g__GGB1573|s__GGB1573_SGB2160|t__SGB2160
SGB	2161	3	0	uSGB	Other	k__Bacteria|p__Bacteroidetes|c__CFGB642|o__OFGB642|f__FGB642|g__GGB1574|s__GGB1574_SGB2161|t__SGB2161
SGB	2162	2	0	uSGB	Other	k__Bacteria|p__Bacteroidetes|c__CFGB642|o__OFGB642|f__FGB642|g__GGB1575|s__GGB1575_SGB2162|t__SGB2162
SGB	2163	2	0	uSGB	Other	k__Bacteria|p__Bacteroidetes|c__CFGB642|o__OFGB642|f__FGB642|g__GGB1575|s__GGB1575_SGB2163|t__SGB2163
SGB	2164	4	0	uSGB	Other	k__Bacteria|p__Bacteroidetes|c__CFGB642|o__OFGB642|f__FGB642|g__GGB1575|s__GGB1575_SGB2164|t__SGB2164
SGB	2165	9	0	uSGB	Other	k__Bacteria|p__Bacteroidetes|c__CFGB642|o__OFGB642|f__FGB642|g__GGB1575|s__GGB1575_SGB2165|t__SGB2165
SGB	2166	1	0	uSGB	Other	k__Bacteria|p__Actinobacteria|c__CFGB642|o__OFGB642|f__FGB642|g__GGB1575|s__GGB1575_SGB2166|t__SGB2166
SGB	2167	1	0	uSGB	Other	k__Bacteria|p__Bacteroidetes|c__CFGB642|o__OFGB642|f__FGB642|g__GGB1576|s__GGB1576_SGB2167|t__SGB2167
SGB	2168	2	0	uSGB	Other	k__Bacteria|p__Bacteroidetes|c__CFGB642|o__OFGB642|f__FGB642|g__GGB1577|s__GGB1577_SGB2168|t__SGB2168
SGB	2169	5	0	uSGB	Other	k__Bacteria|p__Bacteroidetes|c__CFGB642|o__OFGB642|f__FGB642|g__GGB1578|s__GGB1578_SGB2169|t__SGB2169
SGB	2171	1	0	uSGB	Other	k__Bacteria|p__Bacteroidetes|c__CFGB642|o__OFGB642|f__FGB642|g__GGB1580|s__GGB1580_SGB2171|t__SGB2171
SGB	2173	7	0	uSGB	Other	k__Bacteria|p__Bacteroidetes|c__CFGB642|o__OFGB642|f__FGB642|g__GGB1582|s__GGB1582_SGB2173|t__SGB2173
SGB	2174	2	0	uSGB	Other	k__Bacteria|p__Bacteroidetes|c__CFGB642|o__OFGB642|f__FGB642|g__GGB1583|s__GGB1583_SGB2174|t__SGB2174
SGB	2175	1	0	uSGB	Other	k__Bacteria|p__Bacteroidetes|c__CFGB642|o__OFGB642|f__FGB642|g__GGB1584|s__GGB1584_SGB2175|t__SGB2175
SGB	2176	1	0	uSGB	Other	k__Bacteria|p__Bacteroidetes|c__CFGB642|o__OFGB642|f__FGB642|g__GGB1585|s__GGB1585_SGB2176|t__SGB2176
SGB	2180	3	0	uSGB	Family	k__Bacteria|p__Bacteroidetes|c__Bacteroidia|o__Bacteroidales|f__Rikenellaceae|g__GGB1589|s__GGB1589_SGB2180|t__SGB2180
SGB	2181	6	0	uSGB	Genus	k__Bacteria|p__Bacteroidetes|c__Bacteroidia|o__Bacteroidales|f__Rikenellaceae|g__Alistipes|s__Alistipes_SGB2181|t__SGB2181
SGB	2182	1	0	uSGB	Genus	k__Bacteria|p__Bacteroidetes|c__Bacteroidia|o__Bacteroidales|f__Rikenellaceae|g__Alistipes|s__Alistipes_SGB2182|t__SGB2182
SGB	2183	1	0	uSGB	Genus	k__Bacteria|p__Bacteroidetes|c__Bacteroidia|o__Bacteroidales|f__Rikenellaceae|g__Alistipes|s__Alistipes_SGB2183|t__SGB2183
SGB	2184	3	0	uSGB	Genus	k__Bacteria|p__Bacteroidetes|c__Bacteroidia|o__Bacteroidales|f__Rikenellaceae|g__Alistipes|s__Alistipes_SGB2184|t__SGB2184
SGB	2185	4	1	kSGB	Species	k__Bacteria|p__Bacteroidetes|c__Bacteroidia|o__Bacteroidales|f__Rikenellaceae|g__Alistipes|s__Alistipes_sp_CAG_831|t__SGB2185
SGB	2186	1	0	uSGB	Family	k__Bacteria|p__Bacteroidetes|c__Bacteroidia|o__Bacteroidales|f__Rikenellaceae|g__GGB1591|s__GGB1591_SGB2186|t__SGB2186
SGB	2191	2	0	uSGB	Other	k__Bacteria|p__Bacteroidetes|c__CFGB648|o__OFGB648|f__FGB648|g__GGB1596|s__GGB1596_SGB2191|t__SGB2191
SGB	2206	0	1	kSGB	Species	k__Bacteria|p__Bacteroidetes|c__Bacteroidia|o__Bacteroidales|f__Bacteroidales_unclassified|g__Bacteroidales_unclassified|s__Bacteroidales_bacterium_WCE2004|t__SGB2206
SGB	2208	3	0	uSGB	Other	k__Bacteria|p__Bacteroidetes|c__CFGB651|o__OFGB651|f__FGB651|g__GGB1611|s__GGB1611_SGB2208|t__SGB2208
SGB	2209	1	0	uSGB	Other	k__Bacteria|p__Bacteroidetes|c__CFGB651|o__OFGB651|f__FGB651|g__GGB1612|s__GGB1612_SGB2209|t__SGB2209
SGB	2210	1	0	uSGB	Other	k__Bacteria|p__Bacteroidetes|c__CFGB652|o__OFGB652|f__FGB652|g__GGB1613|s__GGB1613_SGB2210|t__SGB2210
SGB	2212	39	0	uSGB	Other	k__Bacteria|p__Bacteroidetes|c__CFGB653|o__OFGB653|f__FGB653|g__GGB1615|s__GGB1615_SGB2212|t__SGB2212
SGB	2214	20	1	kSGB	Species	k__Bacteria|p__Bacteroidetes|c__Bacteroidia|o__Bacteroidales|f__Bacteroidaceae|g__Bacteroides|s__Bacteroides_sp_CAG_1060|t__SGB2214
SGB	2215	23	0	uSGB	Family	k__Bacteria|p__Bacteroidetes|c__Bacteroidia|o__Bacteroidales|f__Bacteroidaceae|g__GGB1618|s__GGB1618_SGB2215|t__SGB2215
SGB	2218	2	0	uSGB	Family	k__Bacteria|p__Bacteroidetes|c__Bacteroidia|o__Bacteroidales|f__Bacteroidaceae|g__GGB1620|s__GGB1620_SGB2218|t__SGB2218
SGB	2219	2	0	uSGB	Family	k__Bacteria|p__Bacteroidetes|c__Bacteroidia|o__Bacteroidales|f__Bacteroidaceae|g__GGB1621|s__GGB1621_SGB2219|t__SGB2219
SGB	2220	2	0	uSGB	Family	k__Bacteria|p__Bacteroidetes|c__Bacteroidia|o__Bacteroidales|f__Bacteroidaceae|g__GGB1621|s__GGB1621_SGB2220|t__SGB2220
SGB	2221	1	0	uSGB	Family	k__Bacteria|p__Bacteroidetes|c__Bacteroidia|o__Bacteroidales|f__Bacteroidaceae|g__GGB1622|s__GGB1622_SGB2221|t__SGB2221
SGB	2225	0	1	kSGB	Species	k__Bacteria|p__Bacteroidetes|c__Bacteroidia|o__Bacteroidales|f__Bacteroidales_unclassified|g__Bacteroidales_unclassified|s__Bacteroidales_bacterium_WCE2008|t__SGB2225
SGB	2227	110	1	kSGB	Species	k__Bacteria|p__Bacteroidetes|c__Bacteroidia|o__Bacteroidales|f__Rikenellaceae|g__Alistipes|s__Alistipes_sp_CAG_514|t__SGB2227
SGB	2228	4	0	uSGB	Genus	k__Bacteria|p__Bacteroidetes|c__Bacteroidia|o__Bacteroidales|f__Rikenellaceae|g__Alistipes|s__Alistipes_SGB2228|t__SGB2228
SGB	2229	44	0	uSGB	Genus	k__Bacteria|p__Bacteroidetes|c__Bacteroidia|o__Bacteroidales|f__Rikenellaceae|g__Alistipes|s__Alistipes_SGB2229|t__SGB2229
SGB	2230	383	1	kSGB	Species	k__Bacteria|p__Bacteroidetes|c__Bacteroidia|o__Bacteroidales|f__Rikenellaceae|g__Alistipes|s__Alistipes_sp_CAG_435|t__SGB2230
SGB	2237	10	0	uSGB	Family	k__Bacteria|p__Bacteroidetes|c__Bacteroidia|o__Bacteroidales|f__Bacteroidaceae|g__GGB1629|s__GGB1629_SGB2237|t__SGB2237
SGB	2238	108	1	kSGB	Species	k__Bacteria|p__Bacteroidetes|c__Bacteroidia|o__Bacteroidales|f__Bacteroidaceae|g__Bacteroides|s__Bacteroides_sp_CAG_770|t__SGB2238
SGB	2239	102	1	kSGB	Species	k__Bacteria|p__Bacteroidetes|c__Bacteroidia|o__Bacteroidales|f__Bacteroidaceae|g__Bacteroides|s__Bacteroides_sp_CAG_709|t__SGB2239
SGB	2240	181	1	kSGB	Species	k__Bacteria|p__Bacteroidetes|c__Bacteroidia|o__Bacteroidales|f__Bacteroidaceae|g__Bacteroides|s__Bacteroides_sp_CAG_545|t__SGB2240
SGB	2241	53	0	uSGB	Family	k__Bacteria|p__Bacteroidetes|c__Bacteroidia|o__Bacteroidales|f__Bacteroidaceae|g__GGB1633|s__GGB1633_SGB2241|t__SGB2241
SGB	2246	1	0	uSGB	Family	k__Bacteria|p__Bacteroidetes|c__Bacteroidia|o__Bacteroidales|f__Bacteroidaceae|g__GGB1635|s__GGB1635_SGB2246|t__SGB2246
SGB	2247	1	0	uSGB	Family	k__Bacteria|p__Bacteroidetes|c__Bacteroidia|o__Bacteroidales|f__Bacteroidaceae|g__GGB1636|s__GGB1636_SGB2247|t__SGB2247
SGB	2252	0	2	kSGB	Species	k__Bacteria|p__Bacteroidetes|c__Bacteroidia|o__Bacteroidales|f__Paludibacteraceae|g__Paludibacter|s__Paludibacter_sp_SCN_50_10|t__SGB2252
SGB	2269	0	1	kSGB	Species	k__Bacteria|p__Bacteria_unclassified|c__Bacteria_unclassified|o__Bacteria_unclassified|f__Bacteria_unclassified|g__Bacteria_unclassified|s__bacterium_F082|t__SGB2269
SGB	2275	16	0	uSGB	Other	k__Bacteria|p__Bacteroidetes|c__CFGB667|o__OFGB667|f__FGB667|g__GGB1661|s__GGB1661_SGB2275|t__SGB2275
SGB	2276	32	0	uSGB	Other	k__Bacteria|p__Bacteroidetes|c__CFGB667|o__OFGB667|f__FGB667|g__GGB1662|s__GGB1662_SGB2276|t__SGB2276
SGB	2277	1	0	uSGB	Other	k__Bacteria|p__Bacteroidetes|c__CFGB667|o__OFGB667|f__FGB667|g__GGB1662|s__GGB1662_SGB2277|t__SGB2277
SGB	2278	8	0	uSGB	Other	k__Bacteria|p__Bacteroidetes|c__CFGB668|o__OFGB668|f__FGB668|g__GGB1663|s__GGB1663_SGB2278|t__SGB2278
SGB	2279	38	0	uSGB	Other	k__Bacteria|p__Bacteroidetes|c__CFGB668|o__OFGB668|f__FGB668|g__GGB1663|s__GGB1663_SGB2279|t__SGB2279
SGB	2284	2	0	uSGB	Other	k__Bacteria|p__Bacteroidetes|c__CFGB670|o__OFGB670|f__FGB670|g__GGB1668|s__GGB1668_SGB2284|t__SGB2284
SGB	2285	6	0	uSGB	Other	k__Bacteria|p__Bacteroidetes|c__CFGB671|o__OFGB671|f__FGB671|g__GGB1669|s__GGB1669_SGB2285|t__SGB2285
SGB	2286	358	2	kSGB	Species	k__Bacteria|p__Bacteroidetes|c__Bacteroidia|o__Bacteroidales|f__Rikenellaceae|g__Alistipes|s__Alistipes_sp_CAG_157|t__SGB2286
SGB	2287	5	0	uSGB	Family	k__Bacteria|p__Bacteroidetes|c__Bacteroidia|o__Bacteroidales|f__Rikenellaceae|g__GGB1671|s__GGB1671_SGB2287|t__SGB2287
SGB	2288	3	0	uSGB	Family	k__Bacteria|p__Bacteroidetes|c__Bacteroidia|o__Bacteroidales|f__Rikenellaceae|g__GGB1672|s__GGB1672_SGB2288|t__SGB2288
SGB	2289	3	0	uSGB	Family	k__Bacteria|p__Bacteroidetes|c__Bacteroidia|o__Bacteroidales|f__Rikenellaceae|g__GGB1672|s__GGB1672_SGB2289|t__SGB2289
SGB	2290	346	0	uSGB	Family	k__Bacteria|p__Bacteroidetes|c__Bacteroidia|o__Bacteroidales|f__Rikenellaceae|g__GGB1673|s__GGB1673_SGB2290|t__SGB2290
SGB	2291	1	0	uSGB	Family	k__Bacteria|p__Bacteroidetes|c__Bacteroidia|o__Bacteroidales|f__Rikenellaceae|g__GGB1673|s__GGB1673_SGB2291|t__SGB2291
SGB	2292	2	1	kSGB	Species	k__Bacteria|p__Bacteroidetes|c__Bacteroidia|o__Bacteroidales|f__Rikenellaceae|g__Alistipes|s__Alistipes_sp_CHKCI003|t__SGB2292
SGB	2293	4	0	uSGB	Genus	k__Bacteria|p__Bacteroidetes|c__Bacteroidia|o__Bacteroidales|f__Rikenellaceae|g__Alistipes|s__Alistipes_SGB2293|t__SGB2293
SGB	2294	16	0	uSGB	Genus	k__Bacteria|p__Bacteroidetes|c__Bacteroidia|o__Bacteroidales|f__Rikenellaceae|g__Alistipes|s__Alistipes_SGB2294|t__SGB2294
SGB	2295	717	3	kSGB	Species	k__Bacteria|p__Bacteroidetes|c__Bacteroidia|o__Bacteroidales|f__Rikenellaceae|g__Alistipes|s__Alistipes_shahii|t__SGB2295
SGB	2296	20	0	uSGB	Genus	k__Bacteria|p__Bacteroidetes|c__Bacteroidia|o__Bacteroidales|f__Rikenellaceae|g__Alistipes|s__Alistipes_SGB2296|t__SGB2296
SGB	2297	1	0	uSGB	Genus	k__Bacteria|p__Bacteroidetes|c__Bacteroidia|o__Bacteroidales|f__Rikenellaceae|g__Alistipes|s__Alistipes_SGB2297|t__SGB2297
SGB	2298	2	0	uSGB	Genus	k__Bacteria|p__Bacteroidetes|c__Bacteroidia|o__Bacteroidales|f__Rikenellaceae|g__Alistipes|s__Alistipes_SGB2298|t__SGB2298
SGB	2299	6	1	kSGB	Species	k__Bacteria|p__Bacteroidetes|c__Bacteroidia|o__Bacteroidales|f__Rikenellaceae|g__Alistipes|s__Alistipes_timonensis|t__SGB2299
SGB	2300	1	0	uSGB	Genus	k__Bacteria|p__Bacteroidetes|c__Bacteroidia|o__Bacteroidales|f__Rikenellaceae|g__Alistipes|s__Alistipes_SGB2300|t__SGB2300
SGB	2301	315	4	kSGB	Species	k__Bacteria|p__Bacteroidetes|c__Bacteroidia|o__Bacteroidales|f__Rikenellaceae|g__Alistipes|s__Alistipes_sp_HGB5|t__SGB2301
SGB	2302	2	0	uSGB	Genus	k__Bacteria|p__Bacteroidetes|c__Bacteroidia|o__Bacteroidales|f__Rikenellaceae|g__Alistipes|s__Alistipes_SGB2302|t__SGB2302
SGB	2303	995	4	kSGB	Species	k__Bacteria|p__Bacteroidetes|c__Bacteroidia|o__Bacteroidales|f__Rikenellaceae|g__Alistipes|s__Alistipes_finegoldii|t__SGB2303
SGB	2304	68	1	kSGB	Species	k__Bacteria|p__Bacteroidetes|c__Bacteroidia|o__Bacteroidales|f__Rikenellaceae|g__Alistipes|s__Alistipes_sp_An31A|t__SGB2304
SGB	2305	12	0	uSGB	Genus	k__Bacteria|p__Bacteroidetes|c__Bacteroidia|o__Bacteroidales|f__Rikenellaceae|g__Alistipes|s__Alistipes_SGB2305|t__SGB2305
SGB	2306	2	1	kSGB	Species	k__Bacteria|p__Bacteroidetes|c__Bacteroidia|o__Bacteroidales|f__Rikenellaceae|g__Alistipes|s__Alistipes_sp_An66|t__SGB2306
SGB	2307	2	0	uSGB	Genus	k__Bacteria|p__Bacteroidetes|c__Bacteroidia|o__Bacteroidales|f__Rikenellaceae|g__Alistipes|s__Alistipes_SGB2307|t__SGB2307
SGB	2308	0	2	kSGB	Species	k__Bacteria|p__Bacteroidetes|c__Bacteroidia|o__Bacteroidales|f__Rikenellaceae|g__Alistipes|s__Alistipes_sp_An54|t__SGB2308
SGB	2309	1	0	uSGB	Genus	k__Bacteria|p__Bacteroidetes|c__Bacteroidia|o__Bacteroidales|f__Rikenellaceae|g__Alistipes|s__Alistipes_SGB2309|t__SGB2309
SGB	2310	3	0	uSGB	Family	k__Bacteria|p__Bacteroidetes|c__Bacteroidia|o__Bacteroidales|f__Rikenellaceae|g__GGB1679|s__GGB1679_SGB2310|t__SGB2310
SGB	2311	58	0	uSGB	Family	k__Bacteria|p__Bacteroidetes|c__Bacteroidia|o__Bacteroidales|f__Rikenellaceae|g__GGB1679|s__GGB1679_SGB2311|t__SGB2311
SGB	2312	54	0	uSGB	Family	k__Bacteria|p__Bacteroidetes|c__Bacteroidia|o__Bacteroidales|f__Rikenellaceae|g__GGB1680|s__GGB1680_SGB2312|t__SGB2312
SGB	2313	181	1	kSGB	Species	k__Bacteria|p__Bacteroidetes|c__Bacteroidia|o__Bacteroidales|f__Rikenellaceae|g__Alistipes|s__Alistipes_sp_CAG_268|t__SGB2313
SGB	2315	1	0	uSGB	Family	k__Bacteria|p__Bacteroidetes|c__Bacteroidia|o__Bacteroidales|f__Rikenellaceae|g__GGB1683|s__GGB1683_SGB2315|t__SGB2315
SGB	2317	8	0	uSGB	Family	k__Bacteria|p__Bacteroidetes|c__Bacteroidia|o__Bacteroidales|f__Rikenellaceae|g__GGB1685|s__GGB1685_SGB2317|t__SGB2317
SGB	2318	2560	2	kSGB	Species	k__Bacteria|p__Bacteroidetes|c__Bacteroidia|o__Bacteroidales|f__Rikenellaceae|g__Alistipes|s__Alistipes_putredinis|t__SGB2318
SGB	2320	2	0	uSGB	Family	k__Bacteria|p__Bacteroidetes|c__Bacteroidia|o__Bacteroidales|f__Rikenellaceae|g__GGB1688|s__GGB1688_SGB2320|t__SGB2320
SGB	2321	42	0	uSGB	Family	k__Bacteria|p__Bacteroidetes|c__Bacteroidia|o__Bacteroidales|f__Rikenellaceae|g__GGB1689|s__GGB1689_SGB2321|t__SGB2321
SGB	2322	1	0	uSGB	Family	k__Bacteria|p__Bacteroidetes|c__Bacteroidia|o__Bacteroidales|f__Rikenellaceae|g__GGB1690|s__GGB1690_SGB2322|t__SGB2322
SGB	2323	9	0	uSGB	Family	k__Bacteria|p__Bacteroidetes|c__Bacteroidia|o__Bacteroidales|f__Rikenellaceae|g__GGB1691|s__GGB1691_SGB2323|t__SGB2323
SGB	2324	1	0	uSGB	Family	k__Bacteria|p__Bacteroidetes|c__Bacteroidia|o__Bacteroidales|f__Rikenellaceae|g__GGB1691|s__GGB1691_SGB2324|t__SGB2324
SGB	2325	106	1	kSGB	Species	k__Bacteria|p__Bacteroidetes|c__Bacteroidia|o__Bacteroidales|f__Rikenellaceae|g__Alistipes|s__Alistipes_indistinctus|t__SGB2325
SGB	2326	91	1	kSGB	Species	k__Bacteria|p__Firmicutes|c__Clostridia|o__Clostridiales|f__Ruminococcaceae|g__Faecalibacterium|s__Faecalibacterium_prausnitzii|t__SGB2326
SGB	2327	2	0	uSGB	Family	k__Bacteria|p__Bacteroidetes|c__Bacteroidia|o__Bacteroidales|f__Rikenellaceae|g__GGB1694|s__GGB1694_SGB2327|t__SGB2327
SGB	2328	195	0	uSGB	Family	k__Bacteria|p__Bacteroidetes|c__Bacteroidia|o__Bacteroidales|f__Rikenellaceae|g__GGB1694|s__GGB1694_SGB2328|t__SGB2328
SGB	2329	1	0	uSGB	Family	k__Bacteria|p__Bacteroidetes|c__Bacteroidia|o__Bacteroidales|f__Rikenellaceae|g__GGB1695|s__GGB1695_SGB2329|t__SGB2329
SGB	2336	0	1	kSGB	Species	k__Bacteria|p__Bacteroidetes|c__Cytophagia|o__Cytophagales|f__Amoebophilaceae|g__Candidatus_Cardinium|s__Cardinium_endosymbiont_of_Encarsia_pergandiella|t__SGB2336
SGB	2337	0	1	kSGB	Species	k__Bacteria|p__Bacteroidetes|c__Cytophagia|o__Cytophagales|f__Amoebophilaceae|g__Candidatus_Cardinium|s__Cardinium_endosymbiont_of_Bemisia_tabaci|t__SGB2337
SGB	2339	0	1	kSGB	Species	k__Bacteria|p__Bacteroidetes|c__Cytophagia|o__Cytophagales|f__Amoebophilaceae|g__Candidatus_Amoebophilus|s__Candidatus_Amoebophilus_asiaticus|t__SGB2339
SGB	2340	0	1	kSGB	Species	k__Bacteria|p__Candidatus_Cloacimonetes|c__Candidatus_Cloacimonetes_unclassified|o__Candidatus_Cloacimonetes_unclassified|f__Candidatus_Cloacimonetes_unclassified|g__Candidatus_Cloacimonetes_unclassified|s__Candidatus_Cloacimonetes_bacterium|t__SGB2340
SGB	2342	0	1	kSGB	Species	k__Bacteria|p__Bacteria_unclassified|c__Bacteria_unclassified|o__Bacteria_unclassified|f__Bacteria_unclassified|g__Bacteria_unclassified|s__bacterium_B13_2017|t__SGB2342
SGB	2348	0	2	kSGB	Species	k__Bacteria|p__Bacteroidetes|c__Bacteroidetes_unclassified|o__Bacteroidetes_unclassified|f__Bacteroidetes_unclassified|g__Bacteroidetes_unclassified|s__Bacteroidetes_bacterium|t__SGB2348
SGB	2349	0	1	kSGB	Species	k__Bacteria|p__Balneolaeota|c__Balneolia|o__Balneolales|f__Balneolaceae|g__Balneola|s__Balneola_sp_EhC07|t__SGB2349
SGB	2350	0	1	kSGB	Species	k__Bacteria|p__Balneolaeota|c__Balneolia|o__Balneolales|f__Balneolaceae|g__Balneola|s__Balneola_sp|t__SGB2350
SGB	2352	0	2	kSGB	Species	k__Bacteria|p__Balneolaeota|c__Balneolia|o__Balneolales|f__Balneolaceae|g__Balneola|s__Balneola_sp|t__SGB2352
SGB	2362	0	1	kSGB	Species	k__Bacteria|p__Bacteroidetes|c__Bacteroidetes_unclassified|o__Bacteroidetes_unclassified|f__Bacteroidetes_unclassified|g__Bacteroidetes_unclassified|s__Bacteroidetes_bacterium_RBG_13_42_15|t__SGB2362
SGB	2365	0	1	kSGB	Species	k__Bacteria|p__Bacteroidetes|c__Bacteroidetes_unclassified|o__Bacteroidetes_unclassified|f__Bacteroidetes_unclassified|g__Bacteroidetes_unclassified|s__Bacteroidetes_bacterium_GWF2_40_14|t__SGB2365
SGB	2367	0	1	kSGB	Species	k__Bacteria|p__Bacteroidetes|c__Bacteroidia|o__Bacteroidales|f__Bacteroidales_unclassified|g__Bacteroidales_unclassified|s__Bacteroidales_bacterium_CF|t__SGB2367
SGB	2376	0	1	kSGB	Species	k__Bacteria|p__Bacteroidetes|c__Bacteroidetes_unclassified|o__Bacteroidetes_unclassified|f__Bacteroidetes_unclassified|g__Bacteroidetes_unclassified|s__Bacteroidetes_bacterium_HGW_Bacteroidetes_9|t__SGB2376
SGB	2378	0	1	kSGB	Species	k__Bacteria|p__Bacteroidetes|c__Bacteroidia|o__Bacteroidales|f__Lentimicrobiaceae|g__Lentimicrobium|s__Lentimicrobium_saccharophilum|t__SGB2378
SGB	2389	0	1	kSGB	Species	k__Bacteria|p__Bacteroidetes|c__Bacteroidia|o__Marinilabiliales|f__Marinilabiliaceae|g__Saccharicrinis|s__Saccharicrinis_fermentans|t__SGB2389
SGB	2394	0	1	kSGB	Species	k__Bacteria|p__Bacteroidetes|c__Bacteroidia|o__Marinilabiliales|f__Marinilabiliaceae|g__Thermophagus|s__Thermophagus_xiamenensis|t__SGB2394
SGB	2397	0	1	kSGB	Species	k__Bacteria|p__Bacteroidetes|c__Bacteroidetes_unclassified|o__Bacteroidetes_unclassified|f__Bacteroidetes_unclassified|g__Bacteroidetes_unclassified|s__Bacteroidetes_bacterium_GWF2_49_14|t__SGB2397
SGB	2398	0	1	kSGB	Species	k__Bacteria|p__Bacteroidetes|c__Bacteroidia|o__Marinilabiliales|f__Marinilabiliaceae|g__Geofilum|s__Geofilum_rubicundum|t__SGB2398
SGB	2400	0	1	kSGB	Species	k__Bacteria|p__Bacteroidetes|c__Bacteroidia|o__Marinilabiliales|f__Marinilabiliaceae|g__Alkalitalea|s__Alkalitalea_saponilacus|t__SGB2400
SGB	2403	0	1	kSGB	Species	k__Bacteria|p__Bacteroidetes|c__Bacteroidia|o__Marinilabiliales|f__Prolixibacteraceae|g__Sunxiuqinia|s__Sunxiuqinia_dokdonensis|t__SGB2403
SGB	2404	0	1	kSGB	Species	k__Bacteria|p__Bacteroidetes|c__Bacteroidia|o__Marinilabiliales|f__Prolixibacteraceae|g__Sunxiuqinia|s__Sunxiuqinia_elliptica|t__SGB2404
SGB	2405	0	2	kSGB	Species	k__Bacteria|p__Bacteroidetes|c__Bacteroidia|o__Marinilabiliales|f__Prolixibacteraceae|g__Draconibacterium|s__Draconibacterium_orientale|t__SGB2405
SGB	2406	0	1	kSGB	Species	k__Bacteria|p__Bacteroidetes|c__Bacteroidia|o__Marinilabiliales|f__Prolixibacteraceae|g__Draconibacterium|s__Draconibacterium_sediminis|t__SGB2406
SGB	2407	0	1	kSGB	Species	k__Bacteria|p__Bacteroidetes|c__Bacteroidia|o__Marinilabiliales|f__Prolixibacteraceae|g__Mariniphaga|s__Mariniphaga_anaerophila|t__SGB2407
SGB	2408	0	1	kSGB	Species	k__Bacteria|p__Bacteroidetes|c__Bacteroidia|o__Marinilabiliales|f__Prolixibacteraceae|g__Tangfeifania|s__Tangfeifania_diversioriginum|t__SGB2408
SGB	2410	0	1	kSGB	Species	k__Bacteria|p__Bacteroidetes|c__Bacteroidia|o__Marinilabiliales|f__Marinifilaceae|g__Marinifilaceae_unclassified|s__Marinifilaceae_bacterium_SPP2|t__SGB2410
SGB	2411	0	1	kSGB	Species	k__Bacteria|p__Bacteroidetes|c__Bacteroidia|o__Marinilabiliales|f__Marinifilaceae|g__Labilibaculum|s__Labilibaculum_manganireducens|t__SGB2411
SGB	2412	0	1	kSGB	Species	k__Bacteria|p__Bacteroidetes|c__Bacteroidia|o__Marinilabiliales|f__Marinifilaceae|g__Labilibaculum|s__Labilibaculum_filiforme|t__SGB2412
SGB	2413	0	1	kSGB	Species	k__Bacteria|p__Bacteroidetes|c__Bacteroidia|o__Marinilabiliales|f__Salinivirgaceae|g__Salinivirga|s__Salinivirga_cyanobacteriivorans|t__SGB2413
SGB	2414	0	1	kSGB	Species	k__Bacteria|p__Bacteroidetes|c__Bacteroidia|o__Marinilabiliales|f__Salinivirgaceae|g__Salinivirgaceae_unclassified|s__Salinivirgaceae_bacterium|t__SGB2414
SGB	2420	0	1	kSGB	Species	k__Bacteria|p__Bacteroidetes|c__Flavobacteriia|o__Flavobacteriales|f__Cryomorphaceae|g__Cryomorphaceae_unclassified|s__Cryomorphaceae_bacterium|t__SGB2420
SGB	2421	0	1	kSGB	Species	k__Bacteria|p__Bacteroidetes|c__Flavobacteriia|o__Flavobacteriales|f__Cryomorphaceae|g__Cryomorphaceae_unclassified|s__Cryomorphaceae_bacterium|t__SGB2421
SGB	2425	0	1	kSGB	Species	k__Bacteria|p__Bacteroidetes|c__Flavobacteriia|o__Flavobacteriales|f__Crocinitomicaceae|g__Brumimicrobium|s__Brumimicrobium_sp_LHR20|t__SGB2425
SGB	2427	0	1	kSGB	Species	k__Bacteria|p__Bacteroidetes|c__Flavobacteriia|o__Flavobacteriales|f__Crocinitomicaceae|g__Lishizhenia|s__Lishizhenia_tianjinensis|t__SGB2427
SGB	2432	0	1	kSGB	Species	k__Bacteria|p__Bacteroidetes|c__Flavobacteriia|o__Flavobacteriales|f__Crocinitomicaceae|g__Fluviicola|s__Fluviicola_taffensis|t__SGB2432
SGB	2438	0	1	kSGB	Species	k__Bacteria|p__Kiritimatiellaeota|c__Kiritimatiellae|o__Kiritimatiellales|f__Kiritimatiellaceae|g__Kiritimatiellaceae_unclassified|s__Kiritimatiellaceae_bacterium_TMED266|t__SGB2438
SGB	2446	0	1	kSGB	Species	k__Bacteria|p__Bacteroidetes|c__Bacteroidetes_unclassified|o__Bacteroidetes_unclassified|f__Bacteroidetes_unclassified|g__Bacteroidetes_unclassified|s__Bacteroidetes_bacterium_RIFCSPLOWO2_12_FULL_31_6|t__SGB2446
SGB	2448	0	3	kSGB	Species	k__Bacteria|p__Bacteroidetes|c__Flavobacteriia|o__Flavobacteriales|f__Cryomorphaceae|g__Cryomorphaceae_unclassified|s__Cryomorphaceae_bacterium_BACL11_MAG_121001_bin54|t__SGB2448
SGB	2450	0	1	kSGB	Species	k__Bacteria|p__Bacteroidetes|c__Bacteroidetes_unclassified|o__Bacteroidetes_unclassified|f__Bacteroidetes_unclassified|g__Bacteroidetes_unclassified|s__Bacteroidetes_bacterium_HGW_Bacteroidetes_12|t__SGB2450
SGB	2454	0	2	kSGB	Species	k__Bacteria|p__Bacteroidetes|c__Bacteroidetes_unclassified|o__Bacteroidetes_unclassified|f__Bacteroidetes_unclassified|g__Bacteroidetes_unclassified|s__Bacteroidetes_bacterium_CG02_land_8_20_14_3_00_31_25|t__SGB2454
SGB	2456	0	1	kSGB	Species	k__Bacteria|p__Bacteroidetes|c__Bacteroidetes_unclassified|o__Bacteroidetes_unclassified|f__Bacteroidetes_unclassified|g__Bacteroidetes_unclassified|s__Bacteroidetes_bacterium_GWF2_33_38|t__SGB2456
SGB	2461	0	4	kSGB	Species	k__Bacteria|p__Bacteroidetes|c__Bacteroidetes_unclassified|o__Bacteroidetes_unclassified|f__Bacteroidetes_unclassified|g__Bacteroidetes_unclassified|s__Bacteroidetes_bacterium_GWB2_32_14|t__SGB2461
SGB	2462	0	1	kSGB	Species	k__Bacteria|p__Bacteroidetes|c__Bacteroidetes_unclassified|o__Bacteroidetes_unclassified|f__Bacteroidetes_unclassified|g__Bacteroidetes_unclassified|s__Bacteroidetes_bacterium_GWA2_30_7|t__SGB2462
SGB	2464	0	1	kSGB	Species	k__Bacteria|p__Bacteroidetes|c__Sphingobacteriia|o__Sphingobacteriales|f__Sphingobacteriales_unclassified|g__Sphingobacteriales_unclassified|s__Sphingobacteriales_bacterium_41_5|t__SGB2464
SGB	2465	0	1	kSGB	Species	k__Bacteria|p__Bacteroidetes|c__Cytophagia|o__Cytophagales|f__Cytophagaceae|g__Flexibacter|s__Flexibacter_flexilis|t__SGB2465
SGB	2468	0	1	kSGB	Species	k__Bacteria|p__Bacteroidetes|c__Bacteroidetes_unclassified|o__Bacteroidetes_unclassified|f__Bacteroidetes_unclassified|g__Bacteroidetes_unclassified|s__Bacteroidetes_bacterium_OLB10|t__SGB2468
SGB	2469	0	1	kSGB	Species	k__Bacteria|p__Bacteroidetes|c__Bacteroidetes_unclassified|o__Bacteroidetes_unclassified|f__Bacteroidetes_unclassified|g__Bacteroidetes_unclassified|s__Bacteroidetes_bacterium_37_13|t__SGB2469
SGB	2473	0	1	kSGB	Species	k__Bacteria|p__Bacteroidetes|c__Bacteroidetes_unclassified|o__Bacteroidetes_unclassified|f__Bacteroidetes_unclassified|g__Bacteroidetes_unclassified|s__Bacteroidetes_bacterium_UKL13_3|t__SGB2473
SGB	2476	4	0	uSGB	Family	k__Bacteria|p__Bacteroidetes|c__Flavobacteriia|o__Flavobacteriales|f__Flavobacteriaceae|g__GGB1832|s__GGB1832_SGB2476|t__SGB2476
SGB	2477	18	0	uSGB	Family	k__Bacteria|p__Bacteroidetes|c__Flavobacteriia|o__Flavobacteriales|f__Flavobacteriaceae|g__GGB1833|s__GGB1833_SGB2477|t__SGB2477
SGB	2478	2	1	kSGB	Species	k__Bacteria|p__Bacteroidetes|c__Flavobacteriia|o__Flavobacteriales|f__Flavobacteriaceae|g__Capnocytophaga|s__Capnocytophaga_sp_oral_taxon_338|t__SGB2478
SGB	2479	119	2	kSGB	Species	k__Bacteria|p__Bacteroidetes|c__Flavobacteriia|o__Flavobacteriales|f__Flavobacteriaceae|g__Capnocytophaga|s__Capnocytophaga_gingivalis|t__SGB2479
SGB	2480	13	0	uSGB	Genus	k__Bacteria|p__Bacteroidetes|c__Flavobacteriia|o__Flavobacteriales|f__Flavobacteriaceae|g__Capnocytophaga|s__Capnocytophaga_SGB2480|t__SGB2480
SGB	2482	1	0	uSGB	Genus	k__Bacteria|p__Bacteroidetes|c__Flavobacteriia|o__Flavobacteriales|f__Flavobacteriaceae|g__Capnocytophaga|s__Capnocytophaga_SGB2482|t__SGB2482
SGB	2483	31	3	kSGB	Species	k__Bacteria|p__Bacteroidetes|c__Flavobacteriia|o__Flavobacteriales|f__Flavobacteriaceae|g__Capnocytophaga|s__Capnocytophaga_granulosa|t__SGB2483
SGB	2485	1	0	uSGB	Genus	k__Bacteria|p__Bacteroidetes|c__Flavobacteriia|o__Flavobacteriales|f__Flavobacteriaceae|g__Capnocytophaga|s__Capnocytophaga_SGB2485|t__SGB2485
SGB	2486	0	1	kSGB	Species	k__Bacteria|p__Bacteroidetes|c__Flavobacteriia|o__Flavobacteriales|f__Flavobacteriaceae|g__Capnocytophaga|s__Capnocytophaga_sp_oral_taxon_863|t__SGB2486
SGB	2487	4	2	kSGB	Species	k__Bacteria|p__Bacteroidetes|c__Flavobacteriia|o__Flavobacteriales|f__Flavobacteriaceae|g__Capnocytophaga|s__Capnocytophaga_haemolytica|t__SGB2487
SGB	2488	4	0	uSGB	Family	k__Bacteria|p__Bacteroidetes|c__Flavobacteriia|o__Flavobacteriales|f__Flavobacteriaceae|g__GGB1838|s__GGB1838_SGB2488|t__SGB2488
SGB	2489	8	1	kSGB	Species	k__Bacteria|p__Bacteroidetes|c__Flavobacteriia|o__Flavobacteriales|f__Flavobacteriaceae|g__Capnocytophaga|s__Capnocytophaga_sp_oral_taxon_332|t__SGB2489
SGB	2490	2	0	uSGB	Family	k__Bacteria|p__Bacteroidetes|c__Flavobacteriia|o__Flavobacteriales|f__Flavobacteriaceae|g__GGB1840|s__GGB1840_SGB2490|t__SGB2490
SGB	2491	2	0	uSGB	Genus	k__Bacteria|p__Bacteroidetes|c__Flavobacteriia|o__Flavobacteriales|f__Flavobacteriaceae|g__Capnocytophaga|s__Capnocytophaga_SGB2491|t__SGB2491
SGB	2492	2	0	uSGB	Genus	k__Bacteria|p__Bacteroidetes|c__Flavobacteriia|o__Flavobacteriales|f__Flavobacteriaceae|g__Capnocytophaga|s__Capnocytophaga_SGB2492|t__SGB2492
SGB	2493	5	0	uSGB	Genus	k__Bacteria|p__Bacteroidetes|c__Flavobacteriia|o__Flavobacteriales|f__Flavobacteriaceae|g__Capnocytophaga|s__Capnocytophaga_SGB2493|t__SGB2493
SGB	2495	77	2	kSGB	Species	k__Bacteria|p__Bacteroidetes|c__Flavobacteriia|o__Flavobacteriales|f__Flavobacteriaceae|g__Capnocytophaga|s__Capnocytophaga_sp_oral_taxon_329|t__SGB2495
SGB	2496	1	0	uSGB	Genus	k__Bacteria|p__Bacteroidetes|c__Flavobacteriia|o__Flavobacteriales|f__Flavobacteriaceae|g__Capnocytophaga|s__Capnocytophaga_SGB2496|t__SGB2496
SGB	2497	26	8	kSGB	Species	k__Bacteria|p__Bacteroidetes|c__Flavobacteriia|o__Flavobacteriales|f__Flavobacteriaceae|g__Capnocytophaga|s__Capnocytophaga_ochracea|t__SGB2497
SGB	2498	5	2	kSGB	Species	k__Bacteria|p__Bacteroidetes|c__Flavobacteriia|o__Flavobacteriales|f__Flavobacteriaceae|g__Capnocytophaga|s__Capnocytophaga_sp_oral_taxon_326|t__SGB2498
SGB	2499	21	0	uSGB	Genus	k__Bacteria|p__Bacteroidetes|c__Flavobacteriia|o__Flavobacteriales|f__Flavobacteriaceae|g__Capnocytophaga|s__Capnocytophaga_SGB2499|t__SGB2499
SGB	2500	8	0	uSGB	Genus	k__Bacteria|p__Bacteroidetes|c__Flavobacteriia|o__Flavobacteriales|f__Flavobacteriaceae|g__Capnocytophaga|s__Capnocytophaga_SGB2500|t__SGB2500
SGB	2502	56	5	kSGB	Species	k__Bacteria|p__Bacteroidetes|c__Flavobacteriia|o__Flavobacteriales|f__Flavobacteriaceae|g__Capnocytophaga|s__Capnocytophaga_sputigena|t__SGB2502
SGB	2503	3	0	uSGB	Family	k__Bacteria|p__Bacteroidetes|c__Flavobacteriia|o__Flavobacteriales|f__Flavobacteriaceae|g__GGB1843|s__GGB1843_SGB2503|t__SGB2503
SGB	2504	2	0	uSGB	Family	k__Bacteria|p__Bacteroidetes|c__Flavobacteriia|o__Flavobacteriales|f__Flavobacteriaceae|g__GGB1843|s__GGB1843_SGB2504|t__SGB2504
SGB	2505	1	0	uSGB	Family	k__Bacteria|p__Bacteroidetes|c__Flavobacteriia|o__Flavobacteriales|f__Flavobacteriaceae|g__GGB1843|s__GGB1843_SGB2505|t__SGB2505
SGB	2506	1	0	uSGB	Family	k__Bacteria|p__Bacteroidetes|c__Flavobacteriia|o__Flavobacteriales|f__Flavobacteriaceae|g__GGB1843|s__GGB1843_SGB2506|t__SGB2506
SGB	2507	2	0	uSGB	Family	k__Bacteria|p__Bacteroidetes|c__Flavobacteriia|o__Flavobacteriales|f__Flavobacteriaceae|g__GGB1843|s__GGB1843_SGB2507|t__SGB2507
SGB	2508	6	0	uSGB	Family	k__Bacteria|p__Bacteroidetes|c__Flavobacteriia|o__Flavobacteriales|f__Flavobacteriaceae|g__GGB1843|s__GGB1843_SGB2508|t__SGB2508
SGB	2509	4	0	uSGB	Family	k__Bacteria|p__Bacteroidetes|c__Flavobacteriia|o__Flavobacteriales|f__Flavobacteriaceae|g__GGB1843|s__GGB1843_SGB2509|t__SGB2509
SGB	2510	8	0	uSGB	Family	k__Bacteria|p__Bacteroidetes|c__Flavobacteriia|o__Flavobacteriales|f__Flavobacteriaceae|g__GGB1843|s__GGB1843_SGB2510|t__SGB2510
SGB	2511	4	0	uSGB	Family	k__Bacteria|p__Bacteroidetes|c__Flavobacteriia|o__Flavobacteriales|f__Flavobacteriaceae|g__GGB1843|s__GGB1843_SGB2511|t__SGB2511
SGB	2512	2	0	uSGB	Family	k__Bacteria|p__Bacteroidetes|c__Flavobacteriia|o__Flavobacteriales|f__Flavobacteriaceae|g__GGB1843|s__GGB1843_SGB2512|t__SGB2512
SGB	2513	3	0	uSGB	Family	k__Bacteria|p__Bacteroidetes|c__Flavobacteriia|o__Flavobacteriales|f__Flavobacteriaceae|g__GGB1843|s__GGB1843_SGB2513|t__SGB2513
SGB	2514	3	0	uSGB	Family	k__Bacteria|p__Bacteroidetes|c__Flavobacteriia|o__Flavobacteriales|f__Flavobacteriaceae|g__GGB1843|s__GGB1843_SGB2514|t__SGB2514
SGB	2515	4	0	uSGB	Family	k__Bacteria|p__Bacteroidetes|c__Flavobacteriia|o__Flavobacteriales|f__Flavobacteriaceae|g__GGB1843|s__GGB1843_SGB2515|t__SGB2515
SGB	2516	20	0	uSGB	Family	k__Bacteria|p__Bacteroidetes|c__Flavobacteriia|o__Flavobacteriales|f__Flavobacteriaceae|g__GGB1843|s__GGB1843_SGB2516|t__SGB2516
SGB	2517	13	0	uSGB	Family	k__Bacteria|p__Bacteroidetes|c__Flavobacteriia|o__Flavobacteriales|f__Flavobacteriaceae|g__GGB1843|s__GGB1843_SGB2517|t__SGB2517
SGB	2518	1	0	uSGB	Family	k__Bacteria|p__Bacteroidetes|c__Flavobacteriia|o__Flavobacteriales|f__Flavobacteriaceae|g__GGB1843|s__GGB1843_SGB2518|t__SGB2518
SGB	2519	1	0	uSGB	Family	k__Bacteria|p__Bacteroidetes|c__Flavobacteriia|o__Flavobacteriales|f__Flavobacteriaceae|g__GGB1843|s__GGB1843_SGB2519|t__SGB2519
SGB	2520	1	0	uSGB	Family	k__Bacteria|p__Bacteroidetes|c__Flavobacteriia|o__Flavobacteriales|f__Flavobacteriaceae|g__GGB1843|s__GGB1843_SGB2520|t__SGB2520
SGB	2521	1	0	uSGB	Family	k__Bacteria|p__Bacteroidetes|c__Flavobacteriia|o__Flavobacteriales|f__Flavobacteriaceae|g__GGB1843|s__GGB1843_SGB2521|t__SGB2521
SGB	2522	1	0	uSGB	Family	k__Bacteria|p__Bacteroidetes|c__Flavobacteriia|o__Flavobacteriales|f__Flavobacteriaceae|g__GGB1843|s__GGB1843_SGB2522|t__SGB2522
SGB	2523	4	0	uSGB	Family	k__Bacteria|p__Bacteroidetes|c__Flavobacteriia|o__Flavobacteriales|f__Flavobacteriaceae|g__GGB1843|s__GGB1843_SGB2523|t__SGB2523
SGB	2524	68	0	uSGB	Family	k__Bacteria|p__Bacteroidetes|c__Flavobacteriia|o__Flavobacteriales|f__Flavobacteriaceae|g__GGB1843|s__GGB1843_SGB2524|t__SGB2524
SGB	2526	1	0	uSGB	Family	k__Bacteria|p__Bacteroidetes|c__Flavobacteriia|o__Flavobacteriales|f__Flavobacteriaceae|g__GGB1843|s__GGB1843_SGB2526|t__SGB2526
SGB	2527	1	0	uSGB	Family	k__Bacteria|p__Bacteroidetes|c__Flavobacteriia|o__Flavobacteriales|f__Flavobacteriaceae|g__GGB1843|s__GGB1843_SGB2527|t__SGB2527
SGB	2528	1	0	uSGB	Family	k__Bacteria|p__Bacteroidetes|c__Flavobacteriia|o__Flavobacteriales|f__Flavobacteriaceae|g__GGB1843|s__GGB1843_SGB2528|t__SGB2528
SGB	2529	1	0	uSGB	Family	k__Bacteria|p__Bacteroidetes|c__Flavobacteriia|o__Flavobacteriales|f__Flavobacteriaceae|g__GGB1843|s__GGB1843_SGB2529|t__SGB2529
SGB	2530	1	0	uSGB	Family	k__Bacteria|p__Bacteroidetes|c__Flavobacteriia|o__Flavobacteriales|f__Flavobacteriaceae|g__GGB1843|s__GGB1843_SGB2530|t__SGB2530
SGB	2531	1	0	uSGB	Family	k__Bacteria|p__Bacteroidetes|c__Flavobacteriia|o__Flavobacteriales|f__Flavobacteriaceae|g__GGB1843|s__GGB1843_SGB2531|t__SGB2531
SGB	2532	6	0	uSGB	Family	k__Bacteria|p__Bacteroidetes|c__Flavobacteriia|o__Flavobacteriales|f__Flavobacteriaceae|g__GGB1844|s__GGB1844_SGB2532|t__SGB2532
SGB	2533	1	0	uSGB	Family	k__Bacteria|p__Bacteroidetes|c__Flavobacteriia|o__Flavobacteriales|f__Flavobacteriaceae|g__GGB1845|s__GGB1845_SGB2533|t__SGB2533
SGB	2534	0	2	kSGB	Species	k__Bacteria|p__Bacteroidetes|c__Flavobacteriia|o__Flavobacteriales|f__Flavobacteriaceae|g__Cloacibacterium|s__Cloacibacterium_normanense|t__SGB2534
SGB	2536	0	28	kSGB	Species	k__Bacteria|p__Bacteroidetes|c__Flavobacteriia|o__Flavobacteriales|f__Flavobacteriaceae|g__Riemerella|s__Riemerella_anatipestifer|t__SGB2536
SGB	2537	0	1	kSGB	Species	k__Bacteria|p__Bacteroidetes|c__Flavobacteriia|o__Flavobacteriales|f__Flavobacteriaceae|g__Riemerella|s__Riemerella_columbipharyngis|t__SGB2537
SGB	2539	0	1	kSGB	Species	k__Bacteria|p__Bacteroidetes|c__Flavobacteriia|o__Flavobacteriales|f__Flavobacteriaceae|g__Cruoricaptor|s__Cruoricaptor_ignavus|t__SGB2539
SGB	2540	0	16	kSGB	Species	k__Bacteria|p__Bacteroidetes|c__Flavobacteriia|o__Flavobacteriales|f__Flavobacteriaceae|g__Elizabethkingia|s__Elizabethkingia_meningoseptica|t__SGB2540
SGB	2541	0	5	kSGB	Species	k__Bacteria|p__Bacteroidetes|c__Flavobacteriia|o__Flavobacteriales|f__Flavobacteriaceae|g__Elizabethkingia|s__Elizabethkingia_ursingii|t__SGB2541
SGB	2542	0	40	kSGB	Species	k__Bacteria|p__Bacteroidetes|c__Flavobacteriia|o__Flavobacteriales|f__Flavobacteriaceae|g__Elizabethkingia|s__Elizabethkingia_anophelis|t__SGB2542
SGB	2543	0	9	kSGB	Species	k__Bacteria|p__Bacteroidetes|c__Flavobacteriia|o__Flavobacteriales|f__Flavobacteriaceae|g__Elizabethkingia|s__Elizabethkingia_bruuniana|t__SGB2543
SGB	2544	0	8	kSGB	Species	k__Bacteria|p__Bacteroidetes|c__Flavobacteriia|o__Flavobacteriales|f__Flavobacteriaceae|g__Elizabethkingia|s__Elizabethkingia_miricola|t__SGB2544
SGB	2545	0	2	kSGB	Species	k__Bacteria|p__Bacteroidetes|c__Flavobacteriia|o__Flavobacteriales|f__Flavobacteriaceae|g__Chryseobacterium|s__Chryseobacterium_halperniae|t__SGB2545
SGB	2546	0	1	kSGB	Species	k__Bacteria|p__Bacteroidetes|c__Flavobacteriia|o__Flavobacteriales|f__Flavobacteriaceae|g__Chryseobacterium|s__Chryseobacterium_sp_FH1|t__SGB2546
SGB	2547	0	1	kSGB	Species	k__Bacteria|p__Bacteroidetes|c__Flavobacteriia|o__Flavobacteriales|f__Flavobacteriaceae|g__Chryseobacterium|s__Chryseobacterium_sp_FP211_J200|t__SGB2547
SGB	2548	1	1	kSGB	Species	k__Bacteria|p__Bacteroidetes|c__Flavobacteriia|o__Flavobacteriales|f__Flavobacteriaceae|g__Chryseobacterium|s__Chryseobacterium_bovis|t__SGB2548
SGB	2549	3	1	kSGB	Species	k__Bacteria|p__Bacteroidetes|c__Flavobacteriia|o__Flavobacteriales|f__Flavobacteriaceae|g__Chryseobacterium|s__Chryseobacterium_hominis|t__SGB2549
SGB	2553	0	1	kSGB	Species	k__Bacteria|p__Bacteroidetes|c__Flavobacteriia|o__Flavobacteriales|f__Flavobacteriaceae|g__Chryseobacterium|s__Chryseobacterium_hungaricum|t__SGB2553
SGB	2554	0	1	kSGB	Species	k__Bacteria|p__Bacteroidetes|c__Flavobacteriia|o__Flavobacteriales|f__Flavobacteriaceae|g__Chryseobacterium|s__Chryseobacterium_zeae|t__SGB2554
SGB	2555	0	1	kSGB	Species	k__Bacteria|p__Bacteroidetes|c__Flavobacteriia|o__Flavobacteriales|f__Flavobacteriaceae|g__Chryseobacterium|s__Chryseobacterium_molle|t__SGB2555
SGB	2557	0	1	kSGB	Species	k__Bacteria|p__Bacteroidetes|c__Flavobacteriia|o__Flavobacteriales|f__Flavobacteriaceae|g__Chryseobacterium|s__Chryseobacterium_sp_Leaf394|t__SGB2557
SGB	2558	0	1	kSGB	Species	k__Bacteria|p__Bacteroidetes|c__Flavobacteriia|o__Flavobacteriales|f__Flavobacteriaceae|g__Chryseobacterium|s__Chryseobacterium_sp_Leaf404|t__SGB2558
SGB	2559	0	1	kSGB	Species	k__Bacteria|p__Bacteroidetes|c__Flavobacteriia|o__Flavobacteriales|f__Flavobacteriaceae|g__Chryseobacterium|s__Chryseobacterium_piscicola|t__SGB2559
SGB	2560	0	3	kSGB	Species	k__Bacteria|p__Bacteroidetes|c__Flavobacteriia|o__Flavobacteriales|f__Flavobacteriaceae|g__Chryseobacterium|s__Chryseobacterium_formosense|t__SGB2560
SGB	2561	0	2	kSGB	Species	k__Bacteria|p__Bacteroidetes|c__Flavobacteriia|o__Flavobacteriales|f__Flavobacteriaceae|g__Chryseobacterium|s__Chryseobacterium_sp_MOF25P|t__SGB2561
SGB	2562	0	1	kSGB	Species	k__Bacteria|p__Bacteroidetes|c__Flavobacteriia|o__Flavobacteriales|f__Flavobacteriaceae|g__Chryseobacterium|s__Chryseobacterium_balustinum|t__SGB2562
SGB	2563	0	1	kSGB	Species	k__Bacteria|p__Bacteroidetes|c__Flavobacteriia|o__Flavobacteriales|f__Flavobacteriaceae|g__Chryseobacterium|s__Chryseobacterium_scophthalmum|t__SGB2563
SGB	2564	0	1	kSGB	Species	k__Bacteria|p__Bacteroidetes|c__Flavobacteriia|o__Flavobacteriales|f__Flavobacteriaceae|g__Chryseobacterium|s__Chryseobacterium_indoltheticum|t__SGB2564
SGB	2565	0	3	kSGB	Species	k__Bacteria|p__Bacteroidetes|c__Flavobacteriia|o__Flavobacteriales|f__Flavobacteriaceae|g__Chryseobacterium|s__Chryseobacterium_sp_Hurlbut01|t__SGB2565
SGB	2566	0	1	kSGB	Species	k__Bacteria|p__Bacteroidetes|c__Flavobacteriia|o__Flavobacteriales|f__Flavobacteriaceae|g__Chryseobacterium|s__Chryseobacterium_sp_JAH|t__SGB2566
SGB	2567	0	2	kSGB	Species	k__Bacteria|p__Bacteroidetes|c__Flavobacteriia|o__Flavobacteriales|f__Flavobacteriaceae|g__Chryseobacterium|s__Chryseobacterium_mucoviscidosis|t__SGB2567
SGB	2568	0	1	kSGB	Species	k__Bacteria|p__Bacteroidetes|c__Flavobacteriia|o__Flavobacteriales|f__Flavobacteriaceae|g__Chryseobacterium|s__Chryseobacterium_taihuense|t__SGB2568
SGB	2569	0	2	kSGB	Species	k__Bacteria|p__Bacteroidetes|c__Flavobacteriia|o__Flavobacteriales|f__Flavobacteriaceae|g__Chryseobacterium|s__Chryseobacterium_sp_P1_3|t__SGB2569
SGB	2570	0	4	kSGB	Species	k__Bacteria|p__Bacteroidetes|c__Flavobacteriia|o__Flavobacteriales|f__Flavobacteriaceae|g__Chryseobacterium|s__Chryseobacterium_indologenes|t__SGB2570
SGB	2571	0	1	kSGB	Species	k__Bacteria|p__Bacteroidetes|c__Flavobacteriia|o__Flavobacteriales|f__Flavobacteriaceae|g__Chryseobacterium|s__Chryseobacterium_sp_ISE14|t__SGB2571
SGB	2572	0	1	kSGB	Species	k__Bacteria|p__Bacteroidetes|c__Flavobacteriia|o__Flavobacteriales|f__Flavobacteriaceae|g__Chryseobacterium|s__Chryseobacterium_lactis|t__SGB2572
SGB	2574	0	1	kSGB	Species	k__Bacteria|p__Bacteroidetes|c__Flavobacteriia|o__Flavobacteriales|f__Flavobacteriaceae|g__Chryseobacterium|s__Chryseobacterium_arthrosphaerae|t__SGB2574
SGB	2575	0	1	kSGB	Species	k__Bacteria|p__Bacteroidetes|c__Flavobacteriia|o__Flavobacteriales|f__Flavobacteriaceae|g__Chryseobacterium|s__Chryseobacterium_culicis|t__SGB2575
SGB	2576	0	1	kSGB	Species	k__Bacteria|p__Bacteroidetes|c__Flavobacteriia|o__Flavobacteriales|f__Flavobacteriaceae|g__Chryseobacterium|s__Chryseobacterium_gleum|t__SGB2576
SGB	2577	0	1	kSGB	Species	k__Bacteria|p__Bacteroidetes|c__Flavobacteriia|o__Flavobacteriales|f__Flavobacteriaceae|g__Chryseobacterium|s__Chryseobacterium_cucumeris|t__SGB2577
SGB	2578	0	1	kSGB	Species	k__Bacteria|p__Bacteroidetes|c__Flavobacteriia|o__Flavobacteriales|f__Flavobacteriaceae|g__Chryseobacterium|s__Chryseobacterium_sp_RU33C|t__SGB2578
SGB	2579	0	1	kSGB	Species	k__Bacteria|p__Bacteroidetes|c__Flavobacteriia|o__Flavobacteriales|f__Flavobacteriaceae|g__Chryseobacterium|s__Chryseobacterium_viscerum|t__SGB2579
SGB	2580	1	1	kSGB	Species	k__Bacteria|p__Bacteroidetes|c__Flavobacteriia|o__Flavobacteriales|f__Flavobacteriaceae|g__Chryseobacterium|s__Chryseobacterium_joostei|t__SGB2580
SGB	2581	0	1	kSGB	Species	k__Bacteria|p__Bacteroidetes|c__Flavobacteriia|o__Flavobacteriales|f__Flavobacteriaceae|g__Chryseobacterium|s__Chryseobacterium_oncorhynchi|t__SGB2581
SGB	2582	0	1	kSGB	Species	k__Bacteria|p__Bacteroidetes|c__Flavobacteriia|o__Flavobacteriales|f__Flavobacteriaceae|g__Chryseobacterium|s__Chryseobacterium_artocarpi|t__SGB2582
SGB	2583	0	1	kSGB	Species	k__Bacteria|p__Bacteroidetes|c__Flavobacteriia|o__Flavobacteriales|f__Flavobacteriaceae|g__Chryseobacterium|s__Chryseobacterium_ureilyticum|t__SGB2583
SGB	2584	0	2	kSGB	Species	k__Bacteria|p__Bacteroidetes|c__Flavobacteriia|o__Flavobacteriales|f__Flavobacteriaceae|g__Chryseobacterium|s__Chryseobacterium_contaminans|t__SGB2584
SGB	2585	0	1	kSGB	Species	k__Bacteria|p__Bacteroidetes|c__Flavobacteriia|o__Flavobacteriales|f__Flavobacteriaceae|g__Chryseobacterium|s__Chryseobacterium_sp_StRB126|t__SGB2585
SGB	2586	0	1	kSGB	Species	k__Bacteria|p__Bacteroidetes|c__Flavobacteriia|o__Flavobacteriales|f__Flavobacteriaceae|g__Chryseobacterium|s__Chryseobacterium_jejuense|t__SGB2586
SGB	2587	0	1	kSGB	Species	k__Bacteria|p__Bacteroidetes|c__Flavobacteriia|o__Flavobacteriales|f__Flavobacteriaceae|g__Chryseobacterium|s__Chryseobacterium_sp_PMSZPI|t__SGB2587
SGB	2588	0	1	kSGB	Species	k__Bacteria|p__Bacteroidetes|c__Flavobacteriia|o__Flavobacteriales|f__Flavobacteriaceae|g__Chryseobacterium|s__Chryseobacterium_sp_YR221|t__SGB2588
SGB	2589	0	1	kSGB	Species	k__Bacteria|p__Bacteroidetes|c__Flavobacteriia|o__Flavobacteriales|f__Flavobacteriaceae|g__Chryseobacterium|s__Chryseobacterium_indologenes|t__SGB2589
SGB	2591	0	2	kSGB	Species	k__Bacteria|p__Bacteroidetes|c__Flavobacteriia|o__Flavobacteriales|f__Flavobacteriaceae|g__Chryseobacterium|s__Chryseobacterium_vrystaatense|t__SGB2591
SGB	2592	0	2	kSGB	Species	k__Bacteria|p__Bacteroidetes|c__Flavobacteriia|o__Flavobacteriales|f__Flavobacteriaceae|g__Chryseobacterium|s__Chryseobacterium_sp_JM1|t__SGB2592
SGB	2593	0	1	kSGB	Species	k__Bacteria|p__Bacteroidetes|c__Flavobacteriia|o__Flavobacteriales|f__Flavobacteriaceae|g__Chryseobacterium|s__Chryseobacterium_oleae|t__SGB2593
SGB	2594	0	1	kSGB	Species	k__Bacteria|p__Bacteroidetes|c__Flavobacteriia|o__Flavobacteriales|f__Flavobacteriaceae|g__Chryseobacterium|s__Chryseobacterium_carnipullorum|t__SGB2594
SGB	2595	0	1	kSGB	Species	k__Bacteria|p__Bacteroidetes|c__Flavobacteriia|o__Flavobacteriales|f__Flavobacteriaceae|g__Chryseobacterium|s__Chryseobacterium_shigense|t__SGB2595
SGB	2596	0	1	kSGB	Species	k__Bacteria|p__Bacteroidetes|c__Flavobacteriia|o__Flavobacteriales|f__Flavobacteriaceae|g__Chryseobacterium|s__Chryseobacterium_sp_52|t__SGB2596
SGB	2597	0	1	kSGB	Species	k__Bacteria|p__Bacteroidetes|c__Flavobacteriia|o__Flavobacteriales|f__Flavobacteriaceae|g__Chryseobacterium|s__Chryseobacterium_angstadtii|t__SGB2597
SGB	2598	0	2	kSGB	Species	k__Bacteria|p__Bacteroidetes|c__Flavobacteriia|o__Flavobacteriales|f__Flavobacteriaceae|g__Chryseobacterium|s__Chryseobacterium_oranimense|t__SGB2598
SGB	2599	0	1	kSGB	Species	k__Bacteria|p__Bacteroidetes|c__Flavobacteriia|o__Flavobacteriales|f__Flavobacteriaceae|g__Chryseobacterium|s__Chryseobacterium_sp_BLS98|t__SGB2599
SGB	2600	0	1	kSGB	Species	k__Bacteria|p__Bacteroidetes|c__Flavobacteriia|o__Flavobacteriales|f__Flavobacteriaceae|g__Chryseobacterium|s__Chryseobacterium_luteum|t__SGB2600
SGB	2601	0	1	kSGB	Species	k__Bacteria|p__Bacteroidetes|c__Flavobacteriia|o__Flavobacteriales|f__Flavobacteriaceae|g__Chryseobacterium|s__Chryseobacterium_kwangjuense|t__SGB2601
SGB	2602	0	2	kSGB	Species	k__Bacteria|p__Bacteroidetes|c__Flavobacteriia|o__Flavobacteriales|f__Flavobacteriaceae|g__Chryseobacterium|s__Chryseobacterium_piperi|t__SGB2602
SGB	2603	0	1	kSGB	Species	k__Bacteria|p__Bacteroidetes|c__Flavobacteriia|o__Flavobacteriales|f__Flavobacteriaceae|g__Chryseobacterium|s__Chryseobacterium_sp_T16E_39|t__SGB2603
SGB	2604	0	1	kSGB	Species	k__Bacteria|p__Bacteroidetes|c__Flavobacteriia|o__Flavobacteriales|f__Flavobacteriaceae|g__Chryseobacterium|s__Chryseobacterium_takakiae|t__SGB2604
SGB	2606	0	1	kSGB	Species	k__Bacteria|p__Bacteroidetes|c__Flavobacteriia|o__Flavobacteriales|f__Flavobacteriaceae|g__Chryseobacterium|s__Chryseobacterium_taeanense|t__SGB2606
SGB	2607	0	1	kSGB	Species	k__Bacteria|p__Bacteroidetes|c__Flavobacteriia|o__Flavobacteriales|f__Flavobacteriaceae|g__Chryseobacterium|s__Chryseobacterium_taichungense|t__SGB2607
SGB	2608	0	1	kSGB	Species	k__Bacteria|p__Bacteroidetes|c__Flavobacteriia|o__Flavobacteriales|f__Flavobacteriaceae|g__Chryseobacterium|s__Chryseobacterium_sp_IHB_B_17019|t__SGB2608
SGB	2609	0	1	kSGB	Species	k__Bacteria|p__Bacteroidetes|c__Flavobacteriia|o__Flavobacteriales|f__Flavobacteriaceae|g__Chryseobacterium|s__Chryseobacterium_wanjuense|t__SGB2609
SGB	2610	0	1	kSGB	Species	k__Bacteria|p__Bacteroidetes|c__Flavobacteriia|o__Flavobacteriales|f__Flavobacteriaceae|g__Chryseobacterium|s__Chryseobacterium_sp_RU37D|t__SGB2610
SGB	2611	0	1	kSGB	Species	k__Bacteria|p__Bacteroidetes|c__Flavobacteriia|o__Flavobacteriales|f__Flavobacteriaceae|g__Chryseobacterium|s__Chryseobacterium_taiwanense|t__SGB2611
SGB	2612	0	1	kSGB	Species	k__Bacteria|p__Bacteroidetes|c__Flavobacteriia|o__Flavobacteriales|f__Flavobacteriaceae|g__Chryseobacterium|s__Chryseobacterium_geocarposphaerae|t__SGB2612
SGB	2613	0	1	kSGB	Species	k__Bacteria|p__Bacteroidetes|c__Flavobacteriia|o__Flavobacteriales|f__Flavobacteriaceae|g__Chryseobacterium|s__Chryseobacterium_arachidis|t__SGB2613
SGB	2615	0	1	kSGB	Species	k__Bacteria|p__Bacteroidetes|c__Flavobacteriia|o__Flavobacteriales|f__Flavobacteriaceae|g__Chryseobacterium|s__Chryseobacterium_sp_Leaf405|t__SGB2615
SGB	2616	0	1	kSGB	Species	k__Bacteria|p__Bacteroidetes|c__Flavobacteriia|o__Flavobacteriales|f__Flavobacteriaceae|g__Chryseobacterium|s__Chryseobacterium_sp_ERMR1_04|t__SGB2616
SGB	2617	0	1	kSGB	Species	k__Bacteria|p__Bacteroidetes|c__Flavobacteriia|o__Flavobacteriales|f__Flavobacteriaceae|g__Chryseobacterium|s__Chryseobacterium_polytrichastri|t__SGB2617
SGB	2618	0	1	kSGB	Species	k__Bacteria|p__Bacteroidetes|c__Flavobacteriia|o__Flavobacteriales|f__Flavobacteriaceae|g__Chryseobacterium|s__Chryseobacterium_glaciei|t__SGB2618
SGB	2619	0	1	kSGB	Species	k__Bacteria|p__Bacteroidetes|c__Flavobacteriia|o__Flavobacteriales|f__Flavobacteriaceae|g__Chryseobacterium|s__Chryseobacterium_limigenitum|t__SGB2619
SGB	2620	0	1	kSGB	Species	k__Bacteria|p__Bacteroidetes|c__Flavobacteriia|o__Flavobacteriales|f__Flavobacteriaceae|g__Chryseobacterium|s__Chryseobacterium_soldanellicola|t__SGB2620
SGB	2621	0	1	kSGB	Species	k__Bacteria|p__Bacteroidetes|c__Flavobacteriia|o__Flavobacteriales|f__Flavobacteriaceae|g__Chryseobacterium|s__Chryseobacterium_sp_FH2|t__SGB2621
SGB	2622	0	1	kSGB	Species	k__Bacteria|p__Bacteroidetes|c__Flavobacteriia|o__Flavobacteriales|f__Flavobacteriaceae|g__Chryseobacterium|s__Chryseobacterium_soli|t__SGB2622
SGB	2623	0	1	kSGB	Species	k__Bacteria|p__Bacteroidetes|c__Flavobacteriia|o__Flavobacteriales|f__Flavobacteriaceae|g__Chryseobacterium|s__Chryseobacterium_sp_CF314|t__SGB2623
SGB	2624	0	1	kSGB	Species	k__Bacteria|p__Bacteroidetes|c__Flavobacteriia|o__Flavobacteriales|f__Flavobacteriaceae|g__Chryseobacterium|s__Chryseobacterium_sp_Leaf201|t__SGB2624
SGB	2625	0	1	kSGB	Species	k__Bacteria|p__Bacteroidetes|c__Flavobacteriia|o__Flavobacteriales|f__Flavobacteriaceae|g__Chryseobacterium|s__Chryseobacterium_sp_Leaf180|t__SGB2625
SGB	2626	0	1	kSGB	Species	k__Bacteria|p__Bacteroidetes|c__Flavobacteriia|o__Flavobacteriales|f__Flavobacteriaceae|g__Soonwooa|s__Soonwooa_buanensis|t__SGB2626
SGB	2628	0	1	kSGB	Species	k__Bacteria|p__Bacteroidetes|c__Flavobacteriia|o__Flavobacteriales|f__Flavobacteriaceae|g__Chryseobacterium|s__Chryseobacterium_humi|t__SGB2628
SGB	2629	0	1	kSGB	Species	k__Bacteria|p__Bacteroidetes|c__Flavobacteriia|o__Flavobacteriales|f__Flavobacteriaceae|g__Chryseobacterium|s__Chryseobacterium_frigidisoli|t__SGB2629
SGB	2630	0	2	kSGB	Species	k__Bacteria|p__Bacteroidetes|c__Flavobacteriia|o__Flavobacteriales|f__Flavobacteriaceae|g__Chryseobacterium|s__Chryseobacterium_jeonii|t__SGB2630
SGB	2631	0	1	kSGB	Species	k__Bacteria|p__Bacteroidetes|c__Flavobacteriia|o__Flavobacteriales|f__Flavobacteriaceae|g__Chryseobacterium|s__Chryseobacterium_chaponense|t__SGB2631
SGB	2633	0	2	kSGB	Species	k__Bacteria|p__Bacteroidetes|c__Flavobacteriia|o__Flavobacteriales|f__Flavobacteriaceae|g__Chryseobacterium|s__Chryseobacterium_antarcticum|t__SGB2633
SGB	2635	0	1	kSGB	Species	k__Bacteria|p__Bacteroidetes|c__Flavobacteriia|o__Flavobacteriales|f__Flavobacteriaceae|g__Chryseobacterium|s__Chryseobacterium_solincola|t__SGB2635
SGB	2636	0	1	kSGB	Species	k__Bacteria|p__Bacteroidetes|c__Flavobacteriia|o__Flavobacteriales|f__Flavobacteriaceae|g__Chryseobacterium|s__Chryseobacterium_koreense|t__SGB2636
SGB	2641	0	1	kSGB	Species	k__Bacteria|p__Bacteroidetes|c__Flavobacteriia|o__Flavobacteriales|f__Flavobacteriaceae|g__Chryseobacterium|s__Chryseobacterium_haifense|t__SGB2641
SGB	2642	0	1	kSGB	Species	k__Bacteria|p__Bacteroidetes|c__Flavobacteriia|o__Flavobacteriales|f__Flavobacteriaceae|g__Flavobacteriaceae_unclassified|s__Flavobacteriaceae_bacterium_JJC|t__SGB2642
SGB	2643	0	1	kSGB	Species	k__Bacteria|p__Bacteroidetes|c__Flavobacteriia|o__Flavobacteriales|f__Flavobacteriaceae|g__Chryseobacterium|s__Chryseobacterium_taklimakanense|t__SGB2643
SGB	2644	0	1	kSGB	Species	k__Bacteria|p__Bacteroidetes|c__Flavobacteriia|o__Flavobacteriales|f__Flavobacteriaceae|g__Flavobacteriaceae_unclassified|s__Flavobacteriaceae_bacterium_3519_10|t__SGB2644
SGB	2647	0	1	kSGB	Species	k__Bacteria|p__Bacteroidetes|c__Flavobacteriia|o__Flavobacteriales|f__Cryomorphaceae|g__Cryomorphaceae_unclassified|s__Cryomorphaceae_bacterium|t__SGB2647
SGB	2659	0	1	kSGB	Species	k__Bacteria|p__Bacteroidetes|c__Flavobacteriia|o__Flavobacteriales|f__Crocinitomicaceae|g__Crocinitomicaceae_unclassified|s__Crocinitomicaceae_bacterium|t__SGB2659
SGB	2660	0	1	kSGB	Species	k__Bacteria|p__Bacteroidetes|c__Bacteroidetes_unclassified|o__Bacteroidetes_unclassified|f__Bacteroidetes_unclassified|g__Bacteroidetes_unclassified|s__Bacteroidetes_bacterium_RIFCSPLOWO2_12_FULL_37_12|t__SGB2660
SGB	2661	0	1	kSGB	Species	k__Bacteria|p__Bacteroidetes|c__Bacteroidetes_unclassified|o__Bacteroidetes_unclassified|f__Bacteroidetes_unclassified|g__Bacteroidetes_unclassified|s__Bacteroidetes_bacterium_RIFCSPHIGHO2_02_FULL_44_7|t__SGB2661
SGB	2662	0	1	kSGB	Species	k__Bacteria|p__Bacteroidetes|c__Flavobacteriia|o__Flavobacteriia_unclassified|f__Flavobacteriia_unclassified|g__Flavobacteriia_unclassified|s__Flavobacteria_bacterium_MS024_2A|t__SGB2662
SGB	2666	0	1	kSGB	Species	k__Bacteria|p__Bacteroidetes|c__Flavobacteriia|o__Flavobacteriales|f__Cryomorphaceae|g__Cryomorphaceae_unclassified|s__Cryomorphaceae_bacterium_BACL29_MAG_121220_bin8|t__SGB2666
SGB	2667	0	1	kSGB	Species	k__Bacteria|p__Bacteroidetes|c__Flavobacteriia|o__Flavobacteriales|f__Cryomorphaceae|g__Cryomorphaceae_unclassified|s__Cryomorphaceae_bacterium_MED_G14|t__SGB2667
SGB	2668	0	1	kSGB	Species	k__Bacteria|p__Bacteroidetes|c__Flavobacteriia|o__Flavobacteriales|f__Cryomorphaceae|g__Cryomorphaceae_unclassified|s__Cryomorphaceae_bacterium_MED_G11|t__SGB2668
SGB	2674	0	1	kSGB	Species	k__Bacteria|p__Proteobacteria|c__Gammaproteobacteria|o__Thiotrichales|f__Thiotrichales_unclassified|g__Thiotrichales_unclassified|s__Thiotrichales_bacterium_TMED285|t__SGB2674
SGB	2676	0	1	kSGB	Species	k__Bacteria|p__Bacteroidetes|c__Flavobacteriia|o__Flavobacteriales|f__Flavobacteriaceae|g__Formosa|s__Formosa_sp_Hel3_A1_48|t__SGB2676
SGB	2677	0	1	kSGB	Species	k__Bacteria|p__Bacteroidetes|c__Flavobacteriia|o__Flavobacteriales|f__Flavobacteriaceae|g__Formosa|s__Formosa_sp_Hel1_33_131|t__SGB2677
SGB	2679	0	1	kSGB	Species	k__Bacteria|p__Bacteroidetes|c__Flavobacteriia|o__Flavobacteriia_unclassified|f__Flavobacteriia_unclassified|g__Flavobacteriia_unclassified|s__Flavobacteria_bacterium_MS024_3C|t__SGB2679
SGB	2683	0	1	kSGB	Species	k__Bacteria|p__Bacteroidetes|c__Flavobacteriia|o__Flavobacteriales|f__Flavobacteriaceae|g__Robiginitalea|s__Robiginitalea_biformata|t__SGB2683
SGB	2684	0	1	kSGB	Species	k__Bacteria|p__Bacteroidetes|c__Flavobacteriia|o__Flavobacteriales|f__Flavobacteriaceae|g__Robiginitalea|s__Robiginitalea_myxolifaciens|t__SGB2684
SGB	2685	0	1	kSGB	Species	k__Bacteria|p__Bacteroidetes|c__Flavobacteriia|o__Flavobacteriales|f__Flavobacteriaceae|g__Muricauda|s__Muricauda_lutaonensis|t__SGB2685
SGB	2686	0	1	kSGB	Species	k__Bacteria|p__Bacteroidetes|c__Flavobacteriia|o__Flavobacteriales|f__Flavobacteriaceae|g__Muricauda|s__Muricauda_sp|t__SGB2686
SGB	2689	0	1	kSGB	Species	k__Bacteria|p__Bacteroidetes|c__Flavobacteriia|o__Flavobacteriales|f__Flavobacteriaceae|g__Muricauda|s__Muricauda_ruestringensis|t__SGB2689
SGB	2690	0	1	kSGB	Species	k__Bacteria|p__Bacteroidetes|c__Flavobacteriia|o__Flavobacteriales|f__Flavobacteriaceae|g__Muricauda|s__Muricauda_sp_ES_050|t__SGB2690
SGB	2691	0	2	kSGB	Species	k__Bacteria|p__Bacteroidetes|c__Flavobacteriia|o__Flavobacteriales|f__Flavobacteriaceae|g__Muricauda|s__Muricauda_zhangzhouensis|t__SGB2691
SGB	2692	0	2	kSGB	Species	k__Bacteria|p__Bacteroidetes|c__Flavobacteriia|o__Flavobacteriales|f__Flavobacteriaceae|g__Muricauda|s__Muricauda_antarctica|t__SGB2692
SGB	2694	0	1	kSGB	Species	k__Bacteria|p__Bacteroidetes|c__Flavobacteriia|o__Flavobacteriales|f__Flavobacteriaceae|g__Flagellimonas|s__Flagellimonas_eckloniae|t__SGB2694
SGB	2695	0	1	kSGB	Species	k__Bacteria|p__Bacteroidetes|c__Flavobacteriia|o__Flavobacteriales|f__Flavobacteriaceae|g__Spongiibacterium|s__Spongiibacterium_pacificum|t__SGB2695
SGB	2696	0	1	kSGB	Species	k__Bacteria|p__Bacteroidetes|c__Flavobacteriia|o__Flavobacteriales|f__Flavobacteriaceae|g__Spongiibacterium|s__Spongiibacterium_flavum|t__SGB2696
SGB	2697	0	1	kSGB	Species	k__Bacteria|p__Bacteroidetes|c__Flavobacteriia|o__Flavobacteriales|f__Flavobacteriaceae|g__Croceitalea|s__Croceitalea_dokdonensis|t__SGB2697
SGB	2699	0	1	kSGB	Species	k__Bacteria|p__Bacteroidetes|c__Flavobacteriia|o__Flavobacteriales|f__Flavobacteriaceae|g__Flavobacterium|s__Flavobacterium_sp|t__SGB2699
SGB	2700	0	2	kSGB	Species	k__Bacteria|p__Bacteroidetes|c__Flavobacteriia|o__Flavobacteriales|f__Flavobacteriaceae|g__Zobellia|s__Zobellia_galactanivorans|t__SGB2700
SGB	2701	0	1	kSGB	Species	k__Bacteria|p__Bacteroidetes|c__Flavobacteriia|o__Flavobacteriales|f__Flavobacteriaceae|g__Zobellia|s__Zobellia_uliginosa|t__SGB2701
SGB	2702	0	1	kSGB	Species	k__Bacteria|p__Bacteroidetes|c__Flavobacteriia|o__Flavobacteriales|f__Flavobacteriaceae|g__Pseudozobellia|s__Pseudozobellia_thermophila|t__SGB2702
SGB	2703	0	1	kSGB	Species	k__Bacteria|p__Bacteroidetes|c__Flavobacteriia|o__Flavobacteriales|f__Flavobacteriaceae|g__Flavobacteriaceae_unclassified|s__Flavobacteriaceae_bacterium_MAR_2009_75|t__SGB2703
SGB	2704	0	1	kSGB	Species	k__Bacteria|p__Bacteroidetes|c__Flavobacteriia|o__Flavobacteriales|f__Flavobacteriaceae|g__Pricia|s__Pricia_antarctica|t__SGB2704
SGB	2705	0	1	kSGB	Species	k__Bacteria|p__Bacteroidetes|c__Flavobacteriia|o__Flavobacteriales|f__Flavobacteriaceae|g__Kriegella|s__Kriegella_aquimaris|t__SGB2705
SGB	2706	0	1	kSGB	Species	k__Bacteria|p__Bacteroidetes|c__Flavobacteriia|o__Flavobacteriales|f__Flavobacteriaceae|g__Sediminicola|s__Sediminicola_luteus|t__SGB2706
SGB	2709	0	1	kSGB	Species	k__Bacteria|p__Bacteroidetes|c__Flavobacteriia|o__Flavobacteriales|f__Cryomorphaceae|g__Cryomorphaceae_unclassified|s__Cryomorphaceae_bacterium_BACL21_MAG_121220_bin10|t__SGB2709
SGB	2711	0	2	kSGB	Species	k__Bacteria|p__Bacteroidetes|c__Flavobacteriia|o__Flavobacteriales|f__Flavobacteriaceae|g__Aequorivita|s__Aequorivita_viscosa|t__SGB2711
SGB	2712	0	1	kSGB	Species	k__Bacteria|p__Bacteroidetes|c__Flavobacteriia|o__Flavobacteriales|f__Flavobacteriaceae|g__Aequorivita|s__Aequorivita_soesokkakensis|t__SGB2712
SGB	2713	0	1	kSGB	Species	k__Bacteria|p__Bacteroidetes|c__Flavobacteriia|o__Flavobacteriales|f__Flavobacteriaceae|g__Aequorivita|s__Aequorivita_sp|t__SGB2713
SGB	2714	0	3	kSGB	Species	k__Bacteria|p__Bacteroidetes|c__Flavobacteriia|o__Flavobacteriales|f__Flavobacteriaceae|g__Aequorivita|s__Aequorivita_sp|t__SGB2714
SGB	2715	0	1	kSGB	Species	k__Bacteria|p__Bacteroidetes|c__Flavobacteriia|o__Flavobacteriales|f__Flavobacteriaceae|g__Aequorivita|s__Vitellibacter_aquimaris|t__SGB2715
SGB	2717	0	1	kSGB	Species	k__Bacteria|p__Bacteroidetes|c__Flavobacteriia|o__Flavobacteriales|f__Flavobacteriaceae|g__Aequorivita|s__Aequorivita_sublithincola|t__SGB2717
SGB	2719	0	1	kSGB	Species	k__Bacteria|p__Bacteroidetes|c__Flavobacteriia|o__Flavobacteriales|f__Flavobacteriaceae|g__Flavobacteriaceae_unclassified|s__Flavobacteriaceae_bacterium|t__SGB2719
SGB	2722	0	1	kSGB	Species	k__Bacteria|p__Bacteroidetes|c__Flavobacteriia|o__Flavobacteriales|f__Flavobacteriaceae|g__Galbibacter|s__Galbibacter_marinus|t__SGB2722
SGB	2723	0	1	kSGB	Species	k__Bacteria|p__Bacteroidetes|c__Flavobacteriia|o__Flavobacteriales|f__Flavobacteriaceae|g__Sinomicrobium|s__Sinomicrobium_oceani|t__SGB2723
SGB	2726	0	1	kSGB	Species	k__Bacteria|p__Bacteroidetes|c__Flavobacteriia|o__Flavobacteriales|f__Flavobacteriaceae|g__Nonlabens|s__Nonlabens_spongiae|t__SGB2726
SGB	2728	0	1	kSGB	Species	k__Bacteria|p__Bacteroidetes|c__Flavobacteriia|o__Flavobacteriales|f__Flavobacteriaceae|g__Gilvibacter|s__Gilvibacter_sp_SZ_19|t__SGB2728
SGB	2729	0	1	kSGB	Species	k__Bacteria|p__Bacteroidetes|c__Flavobacteriia|o__Flavobacteriales|f__Flavobacteriaceae|g__Ulvibacter|s__Ulvibacter_sp_MAR_2010_11|t__SGB2729
SGB	2731	0	1	kSGB	Species	k__Bacteria|p__Bacteroidetes|c__Flavobacteriia|o__Flavobacteriales|f__Flavobacteriaceae|g__Ulvibacter|s__Ulvibacter_sp_LPB0005|t__SGB2731
SGB	2732	0	1	kSGB	Species	k__Bacteria|p__Bacteroidetes|c__Flavobacteriia|o__Flavobacteriales|f__Flavobacteriaceae|g__Ulvibacter|s__Ulvibacter_litoralis|t__SGB2732
SGB	2733	0	1	kSGB	Species	k__Bacteria|p__Bacteroidetes|c__Bacteroidetes_unclassified|o__Bacteroidetes_unclassified|f__Bacteroidetes_unclassified|g__Bacteroidetes_unclassified|s__unidentified_eubacterium_SCB49|t__SGB2733
SGB	2734	0	1	kSGB	Species	k__Bacteria|p__Bacteroidetes|c__Flavobacteriia|o__Flavobacteriales|f__Flavobacteriaceae|g__Croceibacter|s__Croceibacter_atlanticus|t__SGB2734
SGB	2735	0	1	kSGB	Species	k__Bacteria|p__Bacteroidetes|c__Flavobacteriia|o__Flavobacteriales|f__Flavobacteriaceae|g__Flavobacteriaceae_unclassified|s__Flavobacteriaceae_bacterium|t__SGB2735
SGB	2738	0	2	kSGB	Species	k__Bacteria|p__Bacteroidetes|c__Flavobacteriia|o__Flavobacteriales|f__Flavobacteriaceae|g__Leeuwenhoekiella|s__Leeuwenhoekiella_blandensis|t__SGB2738
SGB	2739	0	1	kSGB	Species	k__Bacteria|p__Bacteroidetes|c__Flavobacteriia|o__Flavobacteriales|f__Flavobacteriaceae|g__Leeuwenhoekiella|s__Leeuwenhoekiella_palythoae|t__SGB2739
SGB	2740	0	2	kSGB	Species	k__Bacteria|p__Bacteroidetes|c__Flavobacteriia|o__Flavobacteriales|f__Flavobacteriaceae|g__Leeuwenhoekiella|s__Leeuwenhoekiella_sp|t__SGB2740
SGB	2741	0	2	kSGB	Species	k__Bacteria|p__Bacteroidetes|c__Flavobacteriia|o__Flavobacteriales|f__Flavobacteriaceae|g__Leeuwenhoekiella|s__Leeuwenhoekiella_sp|t__SGB2741
SGB	2742	0	2	kSGB	Species	k__Bacteria|p__Bacteroidetes|c__Flavobacteriia|o__Flavobacteriales|f__Flavobacteriaceae|g__Salinimicrobium|s__Salinimicrobium_catena|t__SGB2742
SGB	2743	0	1	kSGB	Species	k__Bacteria|p__Bacteroidetes|c__Flavobacteriia|o__Flavobacteriales|f__Flavobacteriaceae|g__Salinimicrobium|s__Salinimicrobium_sediminis|t__SGB2743
SGB	2744	0	1	kSGB	Species	k__Bacteria|p__Bacteroidetes|c__Flavobacteriia|o__Flavobacteriales|f__Flavobacteriaceae|g__Gillisia|s__Gillisia_limnaea|t__SGB2744
SGB	2746	0	1	kSGB	Species	k__Bacteria|p__Bacteroidetes|c__Flavobacteriia|o__Flavobacteriales|f__Flavobacteriaceae|g__Joostella|s__Joostella_marina|t__SGB2746
SGB	2747	0	1	kSGB	Species	k__Bacteria|p__Bacteroidetes|c__Flavobacteriia|o__Flavobacteriales|f__Flavobacteriaceae|g__Leeuwenhoekiella|s__Leeuwenhoekiella_marinoflava|t__SGB2747
SGB	2748	0	1	kSGB	Species	k__Bacteria|p__Bacteroidetes|c__Flavobacteriia|o__Flavobacteriales|f__Flavobacteriaceae|g__Gillisia|s__Gillisia_sp_Hel1_33_143|t__SGB2748
SGB	2749	0	1	kSGB	Species	k__Bacteria|p__Bacteroidetes|c__Flavobacteriia|o__Flavobacteriales|f__Flavobacteriaceae|g__Lutibacter|s__Lutibacter_sp_LPB0138|t__SGB2749
SGB	2750	0	5	kSGB	Species	k__Bacteria|p__Bacteroidetes|c__Flavobacteriia|o__Flavobacteriales|f__Flavobacteriaceae|g__Flavobacteriaceae_unclassified|s__Flavobacteriaceae_bacterium|t__SGB2750
SGB	2751	0	1	kSGB	Species	k__Bacteria|p__Bacteroidetes|c__Flavobacteriia|o__Flavobacteriales|f__Flavobacteriaceae|g__Zunongwangia|s__Zunongwangia_atlantica|t__SGB2751
SGB	2752	0	1	kSGB	Species	k__Bacteria|p__Bacteroidetes|c__Flavobacteriia|o__Flavobacteriales|f__Flavobacteriaceae|g__Zunongwangia|s__Zunongwangia_mangrovi|t__SGB2752
SGB	2753	0	2	kSGB	Species	k__Bacteria|p__Bacteroidetes|c__Flavobacteriia|o__Flavobacteriales|f__Flavobacteriaceae|g__Mesonia|s__Mesonia_sp|t__SGB2753
SGB	2754	0	1	kSGB	Species	k__Bacteria|p__Bacteroidetes|c__Flavobacteriia|o__Flavobacteriales|f__Flavobacteriaceae|g__Mesonia|s__Mesonia_phycicola|t__SGB2754
SGB	2755	0	2	kSGB	Species	k__Bacteria|p__Bacteroidetes|c__Flavobacteriia|o__Flavobacteriales|f__Flavobacteriaceae|g__Salegentibacter|s__Salegentibacter_salinarum|t__SGB2755
SGB	2756	0	2	kSGB	Species	k__Bacteria|p__Bacteroidetes|c__Flavobacteriia|o__Flavobacteriales|f__Flavobacteriaceae|g__Salegentibacter|s__Salegentibacter_sp_T436|t__SGB2756
SGB	2757	0	1	kSGB	Species	k__Bacteria|p__Bacteroidetes|c__Flavobacteriia|o__Flavobacteriales|f__Flavobacteriaceae|g__Salegentibacter|s__Salegentibacter_salegens|t__SGB2757
SGB	2758	0	2	kSGB	Species	k__Bacteria|p__Bacteroidetes|c__Flavobacteriia|o__Flavobacteriales|f__Flavobacteriaceae|g__Salegentibacter|s__Salegentibacter_mishustinae|t__SGB2758
SGB	2759	0	3	kSGB	Species	k__Bacteria|p__Bacteroidetes|c__Flavobacteriia|o__Flavobacteriales|f__Flavobacteriaceae|g__Salegentibacter|s__Salegentibacter_salarius|t__SGB2759
SGB	2760	0	1	kSGB	Species	k__Bacteria|p__Bacteroidetes|c__Flavobacteriia|o__Flavobacteriales|f__Flavobacteriaceae|g__Salegentibacter|s__Salegentibacter_holothuriorum|t__SGB2760
SGB	2761	0	1	kSGB	Species	k__Bacteria|p__Bacteroidetes|c__Flavobacteriia|o__Flavobacteriales|f__Flavobacteriaceae|g__Salegentibacter|s__Salegentibacter_flavus|t__SGB2761
SGB	2762	0	1	kSGB	Species	k__Bacteria|p__Bacteroidetes|c__Flavobacteriia|o__Flavobacteriales|f__Flavobacteriaceae|g__Salegentibacter|s__Salegentibacter_echinorum|t__SGB2762
SGB	2763	0	3	kSGB	Species	k__Bacteria|p__Bacteroidetes|c__Flavobacteriia|o__Flavobacteriales|f__Flavobacteriaceae|g__Gramella|s__Gramella_flava|t__SGB2763
SGB	2764	0	1	kSGB	Species	k__Bacteria|p__Bacteroidetes|c__Flavobacteriia|o__Flavobacteriales|f__Flavobacteriaceae|g__Gramella|s__Gramella_forsetii|t__SGB2764
SGB	2765	0	1	kSGB	Species	k__Bacteria|p__Bacteroidetes|c__Flavobacteriia|o__Flavobacteriales|f__Flavobacteriaceae|g__Gramella|s__Gramella_sp_MAR_2010_147|t__SGB2765
SGB	2766	0	1	kSGB	Species	k__Bacteria|p__Bacteroidetes|c__Flavobacteriia|o__Flavobacteriales|f__Flavobacteriaceae|g__Gramella|s__Gramella_sp_MAR_2010_102|t__SGB2766
SGB	2767	0	1	kSGB	Species	k__Bacteria|p__Bacteroidetes|c__Flavobacteriia|o__Flavobacteriales|f__Flavobacteriaceae|g__Gramella|s__Gramella_sp_LPB0144|t__SGB2767
SGB	2768	0	2	kSGB	Species	k__Bacteria|p__Bacteroidetes|c__Flavobacteriia|o__Flavobacteriales|f__Flavobacteriaceae|g__Arenibacter|s__Arenibacter_sp_C_21|t__SGB2768
SGB	2769	0	1	kSGB	Species	k__Bacteria|p__Bacteroidetes|c__Flavobacteriia|o__Flavobacteriales|f__Flavobacteriaceae|g__Arenibacter|s__Arenibacter_palladensis|t__SGB2769
SGB	2770	0	1	kSGB	Species	k__Bacteria|p__Bacteroidetes|c__Flavobacteriia|o__Flavobacteriales|f__Flavobacteriaceae|g__Arenibacter|s__Arenibacter_troitsensis|t__SGB2770
SGB	2771	0	1	kSGB	Species	k__Bacteria|p__Bacteroidetes|c__Flavobacteriia|o__Flavobacteriales|f__Flavobacteriaceae|g__Arenibacter|s__Arenibacter_nanhaiticus|t__SGB2771
SGB	2772	0	1	kSGB	Species	k__Bacteria|p__Bacteroidetes|c__Flavobacteriia|o__Flavobacteriales|f__Flavobacteriaceae|g__Maribacter|s__Maribacter_sp_HTCC2170|t__SGB2772
SGB	2773	0	1	kSGB	Species	k__Bacteria|p__Bacteroidetes|c__Flavobacteriia|o__Flavobacteriales|f__Flavobacteriaceae|g__Flavobacteriaceae_unclassified|s__Flavobacteriaceae_bacterium|t__SGB2773
SGB	2774	0	5	kSGB	Species	k__Bacteria|p__Bacteroidetes|c__Flavobacteriia|o__Flavobacteriales|f__Flavobacteriaceae|g__Cellulophaga|s__Cellulophaga_lytica|t__SGB2774
SGB	2775	0	1	kSGB	Species	k__Bacteria|p__Bacteroidetes|c__Flavobacteriia|o__Flavobacteriales|f__Flavobacteriaceae|g__Algibacter|s__Algibacter_sp_RHA_19|t__SGB2775
SGB	2776	0	1	kSGB	Species	k__Bacteria|p__Bacteroidetes|c__Flavobacteriia|o__Flavobacteriales|f__Flavobacteriaceae|g__Cellulophaga|s__Cellulophaga_fucicola|t__SGB2776
SGB	2777	0	4	kSGB	Species	k__Bacteria|p__Bacteroidetes|c__Flavobacteriia|o__Flavobacteriales|f__Flavobacteriaceae|g__Cellulophaga|s__Cellulophaga_baltica|t__SGB2777
SGB	2778	0	1	kSGB	Species	k__Bacteria|p__Bacteroidetes|c__Flavobacteriia|o__Flavobacteriales|f__Flavobacteriaceae|g__Cellulophaga|s__Cellulophaga_algicola|t__SGB2778
SGB	2779	0	1	kSGB	Species	k__Bacteria|p__Bacteroidetes|c__Flavobacteriia|o__Flavobacteriales|f__Flavobacteriaceae|g__Cellulophaga|s__Cellulophaga_tyrosinoxydans|t__SGB2779
SGB	2780	0	1	kSGB	Species	k__Bacteria|p__Bacteroidetes|c__Flavobacteriia|o__Flavobacteriales|f__Flavobacteriaceae|g__Maribacter|s__Maribacter_cobaltidurans|t__SGB2780
SGB	2781	0	1	kSGB	Species	k__Bacteria|p__Bacteroidetes|c__Flavobacteriia|o__Flavobacteriales|f__Flavobacteriaceae|g__Maribacter|s__Maribacter_sp_4G9|t__SGB2781
SGB	2782	0	1	kSGB	Species	k__Bacteria|p__Bacteroidetes|c__Flavobacteriia|o__Flavobacteriales|f__Flavobacteriaceae|g__Maribacter|s__Maribacter_stanieri|t__SGB2782
SGB	2783	0	1	kSGB	Species	k__Bacteria|p__Bacteroidetes|c__Flavobacteriia|o__Flavobacteriales|f__Flavobacteriaceae|g__Maribacter|s__Maribacter_aquivivus|t__SGB2783
SGB	2784	0	1	kSGB	Species	k__Bacteria|p__Bacteroidetes|c__Flavobacteriia|o__Flavobacteriales|f__Flavobacteriaceae|g__Maribacter|s__Maribacter_ulvicola|t__SGB2784
SGB	2785	0	5	kSGB	Species	k__Bacteria|p__Bacteroidetes|c__Flavobacteriia|o__Flavobacteriales|f__Flavobacteriaceae|g__Maribacter|s__Maribacter_dokdonensis|t__SGB2785
SGB	2786	0	1	kSGB	Species	k__Bacteria|p__Bacteroidetes|c__Flavobacteriia|o__Flavobacteriales|f__Flavobacteriaceae|g__Maribacter|s__Maribacter_sedimenticola|t__SGB2786
SGB	2787	0	2	kSGB	Species	k__Bacteria|p__Bacteroidetes|c__Flavobacteriia|o__Flavobacteriales|f__Flavobacteriaceae|g__Maribacter|s__Maribacter_sp_T28|t__SGB2787
SGB	2788	0	1	kSGB	Species	k__Bacteria|p__Bacteroidetes|c__Flavobacteriia|o__Flavobacteriales|f__Flavobacteriaceae|g__Maribacter|s__Maribacter_orientalis|t__SGB2788
SGB	2789	0	1	kSGB	Species	k__Bacteria|p__Bacteroidetes|c__Flavobacteriia|o__Flavobacteriales|f__Flavobacteriaceae|g__Maribacter|s__Maribacter_arcticus|t__SGB2789
SGB	2790	0	1	kSGB	Species	k__Bacteria|p__Bacteroidetes|c__Flavobacteriia|o__Flavobacteriales|f__Flavobacteriaceae|g__Croceivirga|s__Croceivirga_radicis|t__SGB2790
SGB	2791	0	1	kSGB	Species	k__Bacteria|p__Bacteroidetes|c__Flavobacteriia|o__Flavobacteriales|f__Flavobacteriaceae|g__Sediminicola|s__Sediminicola_sp_YIK13|t__SGB2791
SGB	2792	0	1	kSGB	Species	k__Bacteria|p__Bacteroidetes|c__Flavobacteriia|o__Flavobacteriales|f__Flavobacteriaceae|g__Kordia|s__Kordia_algicida|t__SGB2792
SGB	2793	0	1	kSGB	Species	k__Bacteria|p__Bacteroidetes|c__Flavobacteriia|o__Flavobacteriales|f__Flavobacteriaceae|g__Flavobacteriaceae_unclassified|s__Flavobacteriaceae_bacterium_UJ101|t__SGB2793
SGB	2794	0	1	kSGB	Species	k__Bacteria|p__Bacteroidetes|c__Flavobacteriia|o__Flavobacteriales|f__Flavobacteriaceae|g__Flavobacteriaceae_unclassified|s__Flavobacteriaceae_bacterium|t__SGB2794
SGB	2795	0	1	kSGB	Species	k__Bacteria|p__Bacteroidetes|c__Flavobacteriia|o__Flavobacteriales|f__Flavobacteriaceae|g__Mangrovimonas|s__Mangrovimonas_yunxiaonensis|t__SGB2795
SGB	2796	0	1	kSGB	Species	k__Bacteria|p__Bacteroidetes|c__Flavobacteriia|o__Flavobacteriales|f__Flavobacteriaceae|g__Aquimarina|s__Aquimarina_atlantica|t__SGB2796
SGB	2797	0	1	kSGB	Species	k__Bacteria|p__Bacteroidetes|c__Flavobacteriia|o__Flavobacteriales|f__Flavobacteriaceae|g__Aquimarina|s__Aquimarina_sp_MAR_2010_214|t__SGB2797
SGB	2798	0	1	kSGB	Species	k__Bacteria|p__Bacteroidetes|c__Flavobacteriia|o__Flavobacteriales|f__Flavobacteriaceae|g__Aquimarina|s__Aquimarina_aggregata|t__SGB2798
SGB	2799	0	1	kSGB	Species	k__Bacteria|p__Bacteroidetes|c__Flavobacteriia|o__Flavobacteriales|f__Flavobacteriaceae|g__Aquimarina|s__Aquimarina_spongiae|t__SGB2799
SGB	2800	0	1	kSGB	Species	k__Bacteria|p__Bacteroidetes|c__Flavobacteriia|o__Flavobacteriales|f__Flavobacteriaceae|g__Aquimarina|s__Aquimarina_amphilecti|t__SGB2800
SGB	2801	0	1	kSGB	Species	k__Bacteria|p__Bacteroidetes|c__Flavobacteriia|o__Flavobacteriales|f__Cryomorphaceae|g__Cryomorphaceae_unclassified|s__Cryomorphaceae_bacterium_BACL22_MAG_120619_bin32|t__SGB2801
SGB	2802	0	1	kSGB	Species	k__Bacteria|p__Bacteroidetes|c__Flavobacteriia|o__Flavobacteriales|f__Flavobacteriaceae|g__Flavobacteriaceae_unclassified|s__Flavobacteriaceae_bacterium_CG_4_8_14_3_um_filter_31_8|t__SGB2802
SGB	2803	0	1	kSGB	Species	k__Bacteria|p__Bacteroidetes|c__Flavobacteriia|o__Flavobacteriales|f__Flavobacteriaceae|g__Wenyingzhuangia|s__Wenyingzhuangia_fucanilytica|t__SGB2803
SGB	2804	0	1	kSGB	Species	k__Bacteria|p__Bacteroidetes|c__Flavobacteriia|o__Flavobacteriales|f__Flavobacteriaceae|g__Wenyingzhuangia|s__Wenyingzhuangia_marina|t__SGB2804
SGB	2805	0	1	kSGB	Species	k__Bacteria|p__Bacteroidetes|c__Flavobacteriia|o__Flavobacteriales|f__Flavobacteriaceae|g__Lutibacter|s__Lutibacter_oricola|t__SGB2805
SGB	2806	0	1	kSGB	Species	k__Bacteria|p__Bacteroidetes|c__Flavobacteriia|o__Flavobacteriales|f__Flavobacteriaceae|g__Lutibacter|s__Lutibacter_agarilyticus|t__SGB2806
SGB	2807	0	1	kSGB	Species	k__Bacteria|p__Bacteroidetes|c__Flavobacteriia|o__Flavobacteriales|f__Flavobacteriaceae|g__Lutibacter|s__Lutibacter_maritimus|t__SGB2807
SGB	2808	0	1	kSGB	Species	k__Bacteria|p__Bacteroidetes|c__Flavobacteriia|o__Flavobacteriales|f__Flavobacteriaceae|g__Lutibacter|s__Lutibacter_flavus|t__SGB2808
SGB	2809	0	1	kSGB	Species	k__Bacteria|p__Bacteroidetes|c__Flavobacteriia|o__Flavobacteriales|f__Flavobacteriaceae|g__Lutibacter|s__Lutibacter_profundi|t__SGB2809
SGB	2811	0	1	kSGB	Species	k__Bacteria|p__Bacteroidetes|c__Flavobacteriia|o__Flavobacteriales|f__Flavobacteriaceae|g__Tenacibaculum|s__Tenacibaculum_sp_MAR_2009_124|t__SGB2811
SGB	2812	0	1	kSGB	Species	k__Bacteria|p__Bacteroidetes|c__Flavobacteriia|o__Flavobacteriales|f__Flavobacteriaceae|g__Tenacibaculum|s__Tenacibaculum_maritimum|t__SGB2812
SGB	2813	0	1	kSGB	Species	k__Bacteria|p__Bacteroidetes|c__Flavobacteriia|o__Flavobacteriales|f__Flavobacteriaceae|g__Tenacibaculum|s__Tenacibaculum_sp_SZ_18|t__SGB2813
SGB	2814	0	1	kSGB	Species	k__Bacteria|p__Bacteroidetes|c__Flavobacteriia|o__Flavobacteriales|f__Flavobacteriaceae|g__Tenacibaculum|s__Tenacibaculum_jejuense|t__SGB2814
SGB	2815	0	2	kSGB	Species	k__Bacteria|p__Bacteroidetes|c__Flavobacteriia|o__Flavobacteriales|f__Flavobacteriaceae|g__Tenacibaculum|s__Tenacibaculum_sp_4G03|t__SGB2815
SGB	2816	0	1	kSGB	Species	k__Bacteria|p__Bacteroidetes|c__Flavobacteriia|o__Flavobacteriales|f__Flavobacteriaceae|g__Tenacibaculum|s__Tenacibaculum_mesophilum|t__SGB2816
SGB	2817	0	3	kSGB	Species	k__Bacteria|p__Bacteroidetes|c__Flavobacteriia|o__Flavobacteriales|f__Flavobacteriaceae|g__Tenacibaculum|s__Tenacibaculum_dicentrarchi|t__SGB2817
SGB	2818	0	3	kSGB	Species	k__Bacteria|p__Bacteroidetes|c__Flavobacteriia|o__Flavobacteriales|f__Flavobacteriaceae|g__Tenacibaculum|s__Tenacibaculum_finnmarkense|t__SGB2818
SGB	2819	0	1	kSGB	Species	k__Bacteria|p__Bacteroidetes|c__Flavobacteriia|o__Flavobacteriales|f__Flavobacteriaceae|g__Tenacibaculum|s__Tenacibaculum_sp_TNO020|t__SGB2819
SGB	2820	0	1	kSGB	Species	k__Bacteria|p__Bacteroidetes|c__Flavobacteriia|o__Flavobacteriales|f__Flavobacteriaceae|g__Tenacibaculum|s__Tenacibaculum_soleae|t__SGB2820
SGB	2821	0	1	kSGB	Species	k__Bacteria|p__Bacteroidetes|c__Flavobacteriia|o__Flavobacteriales|f__Flavobacteriaceae|g__Tenacibaculum|s__Tenacibaculum_sp_Bg11_29|t__SGB2821
SGB	2822	0	1	kSGB	Species	k__Bacteria|p__Bacteroidetes|c__Flavobacteriia|o__Flavobacteriales|f__Flavobacteriaceae|g__Tenacibaculum|s__Tenacibaculum_holothuriorum|t__SGB2822
SGB	2823	0	1	kSGB	Species	k__Bacteria|p__Bacteroidetes|c__Flavobacteriia|o__Flavobacteriales|f__Flavobacteriaceae|g__Tenacibaculum|s__Tenacibaculum_sp_MAR_2010_89|t__SGB2823
SGB	2824	0	3	kSGB	Species	k__Bacteria|p__Bacteroidetes|c__Flavobacteriia|o__Flavobacteriales|f__Flavobacteriaceae|g__Polaribacter|s__Polaribacter_sp_Hel1_33_49|t__SGB2824
SGB	2825	0	1	kSGB	Species	k__Bacteria|p__Bacteroidetes|c__Flavobacteriia|o__Flavobacteriales|f__Flavobacteriaceae|g__Polaribacter|s__Polaribacter_sp_SA4_10|t__SGB2825
SGB	2826	0	2	kSGB	Species	k__Bacteria|p__Bacteroidetes|c__Flavobacteriia|o__Flavobacteriales|f__Flavobacteriaceae|g__Polaribacter|s__Polaribacter_dokdonensis|t__SGB2826
SGB	2827	0	1	kSGB	Species	k__Bacteria|p__Bacteroidetes|c__Flavobacteriia|o__Flavobacteriales|f__Flavobacteriaceae|g__Polaribacter|s__Polaribacter_sp_MED152|t__SGB2827
SGB	2828	0	2	kSGB	Species	k__Bacteria|p__Bacteroidetes|c__Flavobacteriia|o__Flavobacteriales|f__Flavobacteriaceae|g__Polaribacter|s__Polaribacter_vadi|t__SGB2828
SGB	2829	0	3	kSGB	Species	k__Bacteria|p__Bacteroidetes|c__Flavobacteriia|o__Flavobacteriales|f__Flavobacteriaceae|g__Polaribacter|s__Polaribacter_reichenbachii|t__SGB2829
SGB	2830	0	1	kSGB	Species	k__Bacteria|p__Bacteroidetes|c__Flavobacteriia|o__Flavobacteriales|f__Flavobacteriaceae|g__Polaribacter|s__Polaribacter_atrinae|t__SGB2830
SGB	2831	0	1	kSGB	Species	k__Bacteria|p__Bacteroidetes|c__Flavobacteriia|o__Flavobacteriales|f__Flavobacteriaceae|g__Polaribacter|s__Polaribacter_sejongensis|t__SGB2831
SGB	2832	0	1	kSGB	Species	k__Bacteria|p__Bacteroidetes|c__Flavobacteriia|o__Flavobacteriales|f__Flavobacteriaceae|g__Polaribacter|s__Polaribacter_sp_Hel1_85|t__SGB2832
SGB	2833	0	1	kSGB	Species	k__Bacteria|p__Bacteroidetes|c__Flavobacteriia|o__Flavobacteriales|f__Flavobacteriaceae|g__Polaribacter|s__Polaribacter_sp_SA4_12|t__SGB2833
SGB	2834	0	1	kSGB	Species	k__Bacteria|p__Bacteroidetes|c__Flavobacteriia|o__Flavobacteriales|f__Flavobacteriaceae|g__Polaribacter|s__Polaribacter_sp_KT25b|t__SGB2834
SGB	2835	0	2	kSGB	Species	k__Bacteria|p__Bacteroidetes|c__Flavobacteriia|o__Flavobacteriales|f__Flavobacteriaceae|g__Polaribacter|s__Polaribacter_sp_BM10|t__SGB2835
SGB	2836	0	1	kSGB	Species	k__Bacteria|p__Bacteroidetes|c__Flavobacteriia|o__Flavobacteriales|f__Flavobacteriaceae|g__Polaribacter|s__Polaribacter_sp_ALD11|t__SGB2836
SGB	2837	0	1	kSGB	Species	k__Bacteria|p__Bacteroidetes|c__Flavobacteriia|o__Flavobacteriales|f__Flavobacteriaceae|g__Tenacibaculum|s__Tenacibaculum_todarodis|t__SGB2837
SGB	2838	0	1	kSGB	Species	k__Bacteria|p__Bacteroidetes|c__Flavobacteriia|o__Flavobacteriales|f__Flavobacteriaceae|g__Polaribacter|s__Polaribacter_irgensii|t__SGB2838
SGB	2839	0	2	kSGB	Species	k__Bacteria|p__Bacteroidetes|c__Flavobacteriia|o__Flavobacteriales|f__Flavobacteriaceae|g__Flavobacteriaceae_unclassified|s__Flavobacteriaceae_bacterium_CG17_big_fil_post_rev_8_21_14_2_50_33_15|t__SGB2839
SGB	2841	0	1	kSGB	Species	k__Bacteria|p__Bacteroidetes|c__Flavobacteriia|o__Flavobacteriales|f__Flavobacteriaceae|g__Confluentibacter|s__Confluentibacter_sp_3B|t__SGB2841
SGB	2843	0	1	kSGB	Species	k__Bacteria|p__Bacteroidetes|c__Flavobacteriia|o__Flavobacteriales|f__Flavobacteriaceae|g__Winogradskyella|s__Winogradskyella_sp_PC_19|t__SGB2843
SGB	2844	0	1	kSGB	Species	k__Bacteria|p__Bacteroidetes|c__Flavobacteriia|o__Flavobacteriales|f__Flavobacteriaceae|g__Winogradskyella|s__Winogradskyella_jejuensis|t__SGB2844
SGB	2845	0	1	kSGB	Species	k__Bacteria|p__Bacteroidetes|c__Flavobacteriia|o__Flavobacteriales|f__Flavobacteriaceae|g__Flavobacteriaceae_unclassified|s__Flavobacteriaceae_bacterium|t__SGB2845
SGB	2847	0	1	kSGB	Species	k__Bacteria|p__Bacteroidetes|c__Flavobacteriia|o__Flavobacteriales|f__Flavobacteriaceae|g__Winogradskyella|s__Winogradskyella_sp_J14_2|t__SGB2847
SGB	2848	0	1	kSGB	Species	k__Bacteria|p__Bacteroidetes|c__Flavobacteriia|o__Flavobacteriales|f__Flavobacteriaceae|g__Winogradskyella|s__Winogradskyella_psychrotolerans|t__SGB2848
SGB	2849	0	1	kSGB	Species	k__Bacteria|p__Bacteroidetes|c__Flavobacteriia|o__Flavobacteriales|f__Flavobacteriaceae|g__Winogradskyella|s__Winogradskyella_thalassocola|t__SGB2849
SGB	2850	0	1	kSGB	Species	k__Bacteria|p__Bacteroidetes|c__Flavobacteriia|o__Flavobacteriales|f__Flavobacteriaceae|g__Winogradskyella|s__Winogradskyella_sp_RHA_55|t__SGB2850
SGB	2851	0	1	kSGB	Species	k__Bacteria|p__Bacteroidetes|c__Flavobacteriia|o__Flavobacteriales|f__Flavobacteriales_unclassified|g__Flavobacteriales_unclassified|s__Flavobacteriales_bacterium_ALC_1|t__SGB2851
SGB	2852	0	1	kSGB	Species	k__Bacteria|p__Bacteroidetes|c__Flavobacteriia|o__Flavobacteriales|f__Flavobacteriaceae|g__Winogradskyella|s__Winogradskyella_sp_PG_2|t__SGB2852
SGB	2854	0	1	kSGB	Species	k__Bacteria|p__Bacteroidetes|c__Flavobacteriia|o__Flavobacteriales|f__Flavobacteriaceae|g__Winogradskyella|s__Winogradskyella_sp_WNB302|t__SGB2854
SGB	2855	0	1	kSGB	Species	k__Bacteria|p__Bacteroidetes|c__Flavobacteriia|o__Flavobacteriales|f__Flavobacteriaceae|g__Formosa|s__Formosa_sp_Hel1_31_208|t__SGB2855
SGB	2856	0	1	kSGB	Species	k__Bacteria|p__Bacteroidetes|c__Flavobacteriia|o__Flavobacteriales|f__Flavobacteriaceae|g__Xanthomarina|s__Xanthomarina_gelatinilytica|t__SGB2856
SGB	2858	0	1	kSGB	Species	k__Bacteria|p__Bacteroidetes|c__Flavobacteriia|o__Flavobacteriales|f__Flavobacteriaceae|g__Bizionia|s__Bizionia_sp_APA_3|t__SGB2858
SGB	2859	0	1	kSGB	Species	k__Bacteria|p__Bacteroidetes|c__Flavobacteriia|o__Flavobacteriales|f__Flavobacteriaceae|g__Bizionia|s__Bizionia_echini|t__SGB2859
SGB	2861	0	1	kSGB	Species	k__Bacteria|p__Bacteroidetes|c__Flavobacteriia|o__Flavobacteriales|f__Flavobacteriaceae|g__Bizionia|s__Bizionia_argentinensis|t__SGB2861
SGB	2862	0	1	kSGB	Species	k__Bacteria|p__Bacteroidetes|c__Flavobacteriia|o__Flavobacteriales|f__Flavobacteriaceae|g__Hanstruepera|s__Hanstruepera_neustonica|t__SGB2862
SGB	2863	0	1	kSGB	Species	k__Bacteria|p__Bacteroidetes|c__Flavobacteriia|o__Flavobacteriales|f__Flavobacteriaceae|g__Formosa|s__Formosa_agariphila|t__SGB2863
SGB	2864	0	1	kSGB	Species	k__Bacteria|p__Bacteroidetes|c__Flavobacteriia|o__Flavobacteriales|f__Flavobacteriaceae|g__Formosa|s__Formosa_algae|t__SGB2864
SGB	2865	0	1	kSGB	Species	k__Bacteria|p__Bacteroidetes|c__Flavobacteriia|o__Flavobacteriales|f__Flavobacteriaceae|g__Gaetbulibacter|s__Gaetbulibacter_sp_5U11|t__SGB2865
SGB	2867	0	2	kSGB	Species	k__Bacteria|p__Bacteroidetes|c__Flavobacteriia|o__Flavobacteriales|f__Flavobacteriaceae|g__Olleya|s__Olleya_sp_1_3|t__SGB2867
SGB	2868	0	1	kSGB	Species	k__Bacteria|p__Bacteroidetes|c__Flavobacteriia|o__Flavobacteriales|f__Flavobacteriaceae|g__Olleya|s__Olleya_sp_Bg11_27|t__SGB2868
SGB	2869	0	2	kSGB	Species	k__Bacteria|p__Bacteroidetes|c__Flavobacteriia|o__Flavobacteriales|f__Flavobacteriaceae|g__Lacinutrix|s__Lacinutrix_sp_5H_3_7_4|t__SGB2869
SGB	2870	0	1	kSGB	Species	k__Bacteria|p__Bacteroidetes|c__Flavobacteriia|o__Flavobacteriales|f__Flavobacteriaceae|g__Lacinutrix|s__Lacinutrix_venerupis|t__SGB2870
SGB	2871	0	1	kSGB	Species	k__Bacteria|p__Bacteroidetes|c__Flavobacteriia|o__Flavobacteriales|f__Flavobacteriaceae|g__Lacinutrix|s__Lacinutrix_sp_Bg11_31|t__SGB2871
SGB	2872	0	1	kSGB	Species	k__Bacteria|p__Bacteroidetes|c__Flavobacteriia|o__Flavobacteriales|f__Flavobacteriaceae|g__Bizionia|s__Bizionia_paragorgiae|t__SGB2872
SGB	2873	0	3	kSGB	Species	k__Bacteria|p__Bacteroidetes|c__Flavobacteriia|o__Flavobacteriales|f__Flavobacteriaceae|g__Jejuia|s__Jejuia_pallidilutea|t__SGB2873
SGB	2874	0	1	kSGB	Species	k__Bacteria|p__Bacteroidetes|c__Flavobacteriia|o__Flavobacteriales|f__Flavobacteriaceae|g__Hyunsoonleella|s__Hyunsoonleella_jejuensis|t__SGB2874
SGB	2876	0	1	kSGB	Species	k__Bacteria|p__Bacteroidetes|c__Flavobacteriia|o__Flavobacteriales|f__Flavobacteriaceae|g__Seonamhaeicola|s__Seonamhaeicola_sp_S2_3|t__SGB2876
SGB	2877	0	1	kSGB	Species	k__Bacteria|p__Bacteroidetes|c__Flavobacteriia|o__Flavobacteriales|f__Flavobacteriaceae|g__Tamlana|s__Tamlana_sp_s12|t__SGB2877
SGB	2878	0	1	kSGB	Species	k__Bacteria|p__Bacteroidetes|c__Flavobacteriia|o__Flavobacteriales|f__Flavobacteriaceae|g__Tamlana|s__Tamlana_sp_UJ94|t__SGB2878
SGB	2879	0	1	kSGB	Species	k__Bacteria|p__Bacteroidetes|c__Flavobacteriia|o__Flavobacteriales|f__Flavobacteriaceae|g__Siansivirga|s__Siansivirga_zeaxanthinifaciens|t__SGB2879
SGB	2880	0	1	kSGB	Species	k__Bacteria|p__Bacteroidetes|c__Flavobacteriia|o__Flavobacteriales|f__Flavobacteriaceae|g__Tamlana|s__Tamlana_nanhaiensis|t__SGB2880
SGB	2881	0	1	kSGB	Species	k__Bacteria|p__Bacteroidetes|c__Flavobacteriia|o__Flavobacteriales|f__Flavobacteriaceae|g__Tamlana|s__Tamlana_sedimentorum|t__SGB2881
SGB	2882	0	3	kSGB	Species	k__Bacteria|p__Bacteroidetes|c__Flavobacteriia|o__Flavobacteriales|f__Flavobacteriaceae|g__Algibacter|s__Algibacter_lectus|t__SGB2882
SGB	2883	0	1	kSGB	Species	k__Bacteria|p__Bacteroidetes|c__Flavobacteriia|o__Flavobacteriales|f__Flavobacteriaceae|g__Algibacter|s__Algibacter_pectinivorans|t__SGB2883
SGB	2884	0	1	kSGB	Species	k__Bacteria|p__Bacteroidetes|c__Flavobacteriia|o__Flavobacteriales|f__Flavobacteriaceae|g__Arenitalea|s__Arenitalea_lutea|t__SGB2884
SGB	2885	0	1	kSGB	Species	k__Bacteria|p__Bacteroidetes|c__Flavobacteriia|o__Flavobacteriales|f__Flavobacteriaceae|g__Flaviramulus|s__Flaviramulus_basaltis|t__SGB2885
SGB	2886	0	1	kSGB	Species	k__Bacteria|p__Bacteroidetes|c__Flavobacteriia|o__Flavobacteriales|f__Flavobacteriaceae|g__Algibacter|s__Algibacter_aquaticus|t__SGB2886
SGB	2887	0	1	kSGB	Species	k__Bacteria|p__Bacteroidetes|c__Flavobacteriia|o__Flavobacteriales|f__Flavobacteriaceae|g__Gaetbulibacter|s__Gaetbulibacter_sp_4G1|t__SGB2887
SGB	2888	0	1	kSGB	Species	k__Bacteria|p__Bacteroidetes|c__Flavobacteriia|o__Flavobacteriales|f__Flavobacteriaceae|g__Algibacter|s__Algibacter_alginicilyticus|t__SGB2888
SGB	2889	0	1	kSGB	Species	k__Bacteria|p__Bacteroidetes|c__Flavobacteriia|o__Flavobacteriales|f__Flavobacteriaceae|g__Flavivirga|s__Flavivirga_eckloniae|t__SGB2889
SGB	2890	0	1	kSGB	Species	k__Bacteria|p__Bacteroidetes|c__Bacteroidetes_unclassified|o__Bacteroidetes_unclassified|f__Bacteroidetes_unclassified|g__Bacteroidetes_unclassified|s__Bacteroidetes_bacterium_MedPE_SWsnd_G2|t__SGB2890
SGB	2891	0	1	kSGB	Species	k__Bacteria|p__Bacteroidetes|c__Flavobacteriia|o__Flavobacteriales|f__Flavobacteriaceae|g__Gelidibacter|s__Gelidibacter_algens|t__SGB2891
SGB	2893	0	1	kSGB	Species	k__Bacteria|p__Bacteroidetes|c__Flavobacteriia|o__Flavobacteriales|f__Flavobacteriaceae|g__Mangrovimonas|s__Mangrovimonas_sp_DI_80|t__SGB2893
SGB	2894	0	1	kSGB	Species	k__Bacteria|p__Bacteroidetes|c__Flavobacteriia|o__Flavobacteriales|f__Flavobacteriaceae|g__Kordia|s__Kordia_sp|t__SGB2894
SGB	2896	0	1	kSGB	Species	k__Bacteria|p__Bacteroidetes|c__Flavobacteriia|o__Flavobacteriales|f__Flavobacteriaceae|g__Flavobacteriaceae_unclassified|s__Flavobacteriaceae_bacterium_MAR_2010_188|t__SGB2896
SGB	2897	0	3	kSGB	Species	k__Bacteria|p__Bacteroidetes|c__Flavobacteriia|o__Flavobacteriales|f__Flavobacteriaceae|g__Dokdonia|s__Dokdonia_donghaensis|t__SGB2897
SGB	2898	0	1	kSGB	Species	k__Bacteria|p__Bacteroidetes|c__Flavobacteriia|o__Flavobacteriales|f__Flavobacteriaceae|g__Dokdonia|s__Dokdonia_sp_4H_3_7_5|t__SGB2898
SGB	2899	0	1	kSGB	Species	k__Bacteria|p__Bacteroidetes|c__Flavobacteriia|o__Flavobacteriales|f__Flavobacteriaceae|g__Dokdonia|s__Dokdonia_pacifica|t__SGB2899
SGB	2900	0	3	kSGB	Species	k__Bacteria|p__Bacteroidetes|c__Flavobacteriia|o__Flavobacteriales|f__Flavobacteriaceae|g__Nonlabens|s__Nonlabens_sediminis|t__SGB2900
SGB	2901	0	1	kSGB	Species	k__Bacteria|p__Bacteroidetes|c__Flavobacteriia|o__Flavobacteriales|f__Flavobacteriaceae|g__Nonlabens|s__Nonlabens_sp_YIK11|t__SGB2901
SGB	2902	0	1	kSGB	Species	k__Bacteria|p__Bacteroidetes|c__Flavobacteriia|o__Flavobacteriales|f__Flavobacteriaceae|g__Nonlabens|s__Nonlabens_sp_Hel1_33_55|t__SGB2902
SGB	2903	0	1	kSGB	Species	k__Bacteria|p__Bacteroidetes|c__Flavobacteriia|o__Flavobacteriales|f__Flavobacteriaceae|g__Nonlabens|s__Nonlabens_marinus|t__SGB2903
SGB	2904	0	4	kSGB	Species	k__Bacteria|p__Bacteroidetes|c__Flavobacteriia|o__Flavobacteriales|f__Flavobacteriaceae|g__Nonlabens|s__Nonlabens_ulvanivorans|t__SGB2904
SGB	2905	0	2	kSGB	Species	k__Bacteria|p__Bacteroidetes|c__Flavobacteriia|o__Flavobacteriales|f__Flavobacteriaceae|g__Nonlabens|s__Nonlabens_ulvanivorans|t__SGB2905
SGB	2906	0	1	kSGB	Species	k__Bacteria|p__Bacteroidetes|c__Flavobacteriia|o__Flavobacteriia_unclassified|f__Flavobacteriia_unclassified|g__Flavobacteriia_unclassified|s__Flavobacteria_bacterium_BBFL7|t__SGB2906
SGB	2907	0	1	kSGB	Species	k__Bacteria|p__Bacteroidetes|c__Flavobacteriia|o__Flavobacteriales|f__Flavobacteriaceae|g__Nonlabens|s__Nonlabens_dokdonensis|t__SGB2907
SGB	2908	0	1	kSGB	Species	k__Bacteria|p__Bacteroidetes|c__Flavobacteriia|o__Flavobacteriales|f__Flavobacteriaceae|g__Nonlabens|s__Nonlabens_sp_MB_3u_79|t__SGB2908
SGB	2909	0	2	kSGB	Species	k__Bacteria|p__Bacteroidetes|c__Flavobacteriia|o__Flavobacteriales|f__Flavobacteriaceae|g__Psychroflexus|s__Psychroflexus_sp_S27|t__SGB2909
SGB	2910	0	1	kSGB	Species	k__Bacteria|p__Bacteroidetes|c__Flavobacteriia|o__Flavobacteriales|f__Flavobacteriaceae|g__Psychroflexus|s__Psychroflexus_salarius|t__SGB2910
SGB	2911	0	1	kSGB	Species	k__Bacteria|p__Bacteroidetes|c__Flavobacteriia|o__Flavobacteriales|f__Flavobacteriaceae|g__Psychroflexus|s__Psychroflexus_torquis|t__SGB2911
SGB	2912	0	1	kSGB	Species	k__Bacteria|p__Bacteroidetes|c__Flavobacteriia|o__Flavobacteriales|f__Flavobacteriaceae|g__Psychroflexus|s__Psychroflexus_sp_MES1_P1E|t__SGB2912
SGB	2913	0	1	kSGB	Species	k__Bacteria|p__Bacteroidetes|c__Flavobacteriia|o__Flavobacteriales|f__Flavobacteriaceae|g__Psychroflexus|s__Psychroflexus_gondwanensis|t__SGB2913
SGB	2914	0	1	kSGB	Species	k__Bacteria|p__Bacteroidetes|c__Flavobacteriia|o__Flavobacteriales|f__Flavobacteriaceae|g__Psychroflexus|s__Psychroflexus_sediminis|t__SGB2914
SGB	2915	0	1	kSGB	Species	k__Bacteria|p__Bacteroidetes|c__Flavobacteriia|o__Flavobacteriales|f__Flavobacteriaceae|g__Flavobacterium|s__Flavobacterium_marinum|t__SGB2915
SGB	2916	0	1	kSGB	Species	k__Bacteria|p__Bacteroidetes|c__Flavobacteriia|o__Flavobacteriales|f__Flavobacteriaceae|g__Flavobacterium|s__Flavobacterium_ummariense|t__SGB2916
SGB	2918	0	1	kSGB	Species	k__Bacteria|p__Bacteroidetes|c__Flavobacteriia|o__Flavobacteriales|f__Flavobacteriaceae|g__Flavobacteriaceae_unclassified|s__Flavobacteriaceae_bacterium_UR159|t__SGB2918
SGB	2919	0	1	kSGB	Species	k__Bacteria|p__Bacteroidetes|c__Sphingobacteriia|o__Sphingobacteriales|f__Sphingobacteriaceae|g__Pseudopedobacter|s__Pseudopedobacter_saltans|t__SGB2919
SGB	2920	0	1	kSGB	Species	k__Bacteria|p__Bacteroidetes|c__Flavobacteriia|o__Flavobacteriales|f__Flavobacteriaceae|g__Moheibacter|s__Moheibacter_sediminis|t__SGB2920
SGB	2921	0	1	kSGB	Species	k__Bacteria|p__Bacteroidetes|c__Cytophagia|o__Cytophagales|f__Cytophagaceae|g__Emticicia|s__Emticicia_sp_TH156|t__SGB2921
SGB	2922	0	1	kSGB	Species	k__Bacteria|p__Bacteroidetes|c__Cytophagia|o__Cytophagales|f__Cytophagaceae|g__Leadbetterella|s__Leadbetterella_byssophila|t__SGB2922
SGB	2924	0	2	kSGB	Species	k__Bacteria|p__Bacteroidetes|c__Flavobacteriia|o__Flavobacteriales|f__Flavobacteriaceae|g__Bergeyella|s__Bergeyella_zoohelcum|t__SGB2924
SGB	2925	0	5	kSGB	Species	k__Bacteria|p__Bacteroidetes|c__Flavobacteriia|o__Flavobacteriales|f__Flavobacteriaceae|g__Capnocytophaga|s__Capnocytophaga_canis|t__SGB2925
SGB	2926	0	4	kSGB	Species	k__Bacteria|p__Bacteroidetes|c__Flavobacteriia|o__Flavobacteriales|f__Flavobacteriaceae|g__Capnocytophaga|s__Capnocytophaga_canimorsus|t__SGB2926
SGB	2927	0	3	kSGB	Species	k__Bacteria|p__Bacteroidetes|c__Flavobacteriia|o__Flavobacteriales|f__Flavobacteriaceae|g__Capnocytophaga|s__Capnocytophaga_cynodegmi|t__SGB2927
SGB	2928	0	1	kSGB	Species	k__Bacteria|p__Bacteroidetes|c__Flavobacteriia|o__Flavobacteriales|f__Flavobacteriaceae|g__Capnocytophaga|s__Capnocytophaga_stomatis|t__SGB2928
SGB	2929	0	2	kSGB	Species	k__Bacteria|p__Bacteroidetes|c__Flavobacteriia|o__Flavobacteriales|f__Flavobacteriaceae|g__Zhouia|s__Zhouia_amylolytica|t__SGB2929
SGB	2930	0	1	kSGB	Species	k__Bacteria|p__Bacteroidetes|c__Flavobacteriia|o__Flavobacteriales|f__Flavobacteriaceae|g__Imtechella|s__Imtechella_halotolerans|t__SGB2930
SGB	2931	0	1	kSGB	Species	k__Bacteria|p__Bacteroidetes|c__Flavobacteriia|o__Flavobacteriales|f__Flavobacteriaceae|g__Pustulibacterium|s__Pustulibacterium_marinum|t__SGB2931
SGB	2932	0	1	kSGB	Species	k__Bacteria|p__Bacteroidetes|c__Flavobacteriia|o__Flavobacteriales|f__Flavobacteriaceae|g__Apibacter|s__Apibacter_mensalis|t__SGB2932
SGB	2933	1	3	kSGB	Species	k__Bacteria|p__Bacteroidetes|c__Flavobacteriia|o__Flavobacteriales|f__Flavobacteriaceae|g__Flavobacterium|s__Flavobacterium_sp_Leaf359|t__SGB2933
SGB	2934	0	1	kSGB	Species	k__Bacteria|p__Bacteroidetes|c__Flavobacteriia|o__Flavobacteriales|f__Flavobacteriaceae|g__Flavobacterium|s__Flavobacterium_noncentrifugens|t__SGB2934
SGB	2935	0	1	kSGB	Species	k__Bacteria|p__Bacteroidetes|c__Flavobacteriia|o__Flavobacteriales|f__Flavobacteriaceae|g__Flavobacterium|s__Flavobacterium_caeni|t__SGB2935
SGB	2937	0	1	kSGB	Species	k__Bacteria|p__Bacteroidetes|c__Flavobacteriia|o__Flavobacteriales|f__Flavobacteriaceae|g__Flavobacterium|s__Flavobacterium_sp_BFFFF1|t__SGB2937
SGB	2938	0	1	kSGB	Species	k__Bacteria|p__Bacteroidetes|c__Bacteroidetes_unclassified|o__Bacteroidetes_unclassified|f__Bacteroidetes_unclassified|g__Bacteroidetes_unclassified|s__Bacteroidetes_bacterium_HGW_Bacteroidetes_23|t__SGB2938
SGB	2941	0	1	kSGB	Species	k__Bacteria|p__Bacteroidetes|c__Bacteroidetes_unclassified|o__Bacteroidetes_unclassified|f__Bacteroidetes_unclassified|g__Bacteroidetes_unclassified|s__Bacteroidetes_bacterium_HGW_Bacteroidetes_2|t__SGB2941
SGB	2944	0	1	kSGB	Species	k__Bacteria|p__Bacteroidetes|c__Flavobacteriia|o__Flavobacteriales|f__Flavobacteriaceae|g__Flavobacterium|s__Flavobacterium_fontis|t__SGB2944
SGB	2945	0	3	kSGB	Species	k__Bacteria|p__Bacteroidetes|c__Flavobacteriia|o__Flavobacteriales|f__Flavobacteriaceae|g__Flavobacterium|s__Flavobacterium_branchiophilum|t__SGB2945
SGB	2946	0	2	kSGB	Species	k__Bacteria|p__Bacteroidetes|c__Flavobacteriia|o__Flavobacteriales|f__Flavobacteriaceae|g__Flavobacterium|s__Flavobacterium_aquatile|t__SGB2946
SGB	2947	0	58	kSGB	Species	k__Bacteria|p__Bacteroidetes|c__Flavobacteriia|o__Flavobacteriales|f__Flavobacteriaceae|g__Flavobacterium|s__Flavobacterium_psychrophilum|t__SGB2947
SGB	2948	0	1	kSGB	Species	k__Bacteria|p__Bacteroidetes|c__Flavobacteriia|o__Flavobacteriales|f__Flavobacteriaceae|g__Flavobacterium|s__Flavobacterium_swingsii|t__SGB2948
SGB	2949	0	1	kSGB	Species	k__Bacteria|p__Bacteroidetes|c__Flavobacteriia|o__Flavobacteriia_unclassified|f__Flavobacteriia_unclassified|g__Flavobacteriia_unclassified|s__Flavobacteria_bacterium_GWA2_35_26|t__SGB2949
SGB	2952	0	1	kSGB	Species	k__Bacteria|p__Bacteroidetes|c__Flavobacteriia|o__Flavobacteriales|f__Flavobacteriaceae|g__Flavobacterium|s__Flavobacterium_fluvii|t__SGB2952
SGB	2953	0	1	kSGB	Species	k__Bacteria|p__Bacteroidetes|c__Flavobacteriia|o__Flavobacteriales|f__Flavobacteriaceae|g__Flavobacterium|s__Flavobacterium_frigoris|t__SGB2953
SGB	2954	0	1	kSGB	Species	k__Bacteria|p__Bacteroidetes|c__Flavobacteriia|o__Flavobacteriales|f__Flavobacteriaceae|g__Flavobacterium|s__Flavobacterium_degerlachei|t__SGB2954
SGB	2955	0	1	kSGB	Species	k__Bacteria|p__Bacteroidetes|c__Flavobacteriia|o__Flavobacteriales|f__Flavobacteriaceae|g__Flavobacterium|s__Flavobacterium_gillisiae|t__SGB2955
SGB	2956	0	1	kSGB	Species	k__Bacteria|p__Bacteroidetes|c__Flavobacteriia|o__Flavobacteriales|f__Flavobacteriaceae|g__Flavobacterium|s__Flavobacterium_frigoris|t__SGB2956
SGB	2957	0	1	kSGB	Species	k__Bacteria|p__Bacteroidetes|c__Flavobacteriia|o__Flavobacteriales|f__Flavobacteriaceae|g__Flavobacterium|s__Flavobacterium_sp_ALD4|t__SGB2957
SGB	2958	0	1	kSGB	Species	k__Bacteria|p__Bacteroidetes|c__Flavobacteriia|o__Flavobacteriales|f__Flavobacteriaceae|g__Flavobacterium|s__Flavobacterium_granuli|t__SGB2958
SGB	2959	0	1	kSGB	Species	k__Bacteria|p__Bacteroidetes|c__Flavobacteriia|o__Flavobacteriales|f__Flavobacteriaceae|g__Flavobacterium|s__Flavobacterium_segetis|t__SGB2959
SGB	2960	0	1	kSGB	Species	k__Bacteria|p__Bacteroidetes|c__Flavobacteriia|o__Flavobacteriales|f__Flavobacteriaceae|g__Flavobacterium|s__Flavobacterium_micromati|t__SGB2960
SGB	2961	0	2	kSGB	Species	k__Bacteria|p__Bacteroidetes|c__Flavobacteriia|o__Flavobacteriales|f__Flavobacteriaceae|g__Flavobacterium|s__Flavobacterium_fryxellicola|t__SGB2961
SGB	2962	0	1	kSGB	Species	k__Bacteria|p__Bacteroidetes|c__Flavobacteriia|o__Flavobacteriales|f__Flavobacteriaceae|g__Flavobacterium|s__Flavobacterium_omnivorum|t__SGB2962
SGB	2963	0	1	kSGB	Species	k__Bacteria|p__Bacteroidetes|c__Flavobacteriia|o__Flavobacteriales|f__Flavobacteriaceae|g__Flavobacterium|s__Flavobacterium_xanthum|t__SGB2963
SGB	2964	0	1	kSGB	Species	k__Bacteria|p__Bacteroidetes|c__Flavobacteriia|o__Flavobacteriales|f__Flavobacteriaceae|g__Flavobacterium|s__Flavobacterium_sp_11|t__SGB2964
SGB	2965	0	1	kSGB	Species	k__Bacteria|p__Bacteroidetes|c__Flavobacteriia|o__Flavobacteriales|f__Flavobacteriaceae|g__Flavobacterium|s__Flavobacterium_sinopsychrotolerans|t__SGB2965
SGB	2966	0	1	kSGB	Species	k__Bacteria|p__Bacteroidetes|c__Flavobacteriia|o__Flavobacteriales|f__Flavobacteriaceae|g__Flavobacterium|s__Flavobacterium_xueshanense|t__SGB2966
SGB	2967	0	1	kSGB	Species	k__Bacteria|p__Bacteroidetes|c__Flavobacteriia|o__Flavobacteriales|f__Flavobacteriaceae|g__Flavobacterium|s__Flavobacterium_urumqiense|t__SGB2967
SGB	2968	0	1	kSGB	Species	k__Bacteria|p__Bacteroidetes|c__Flavobacteriia|o__Flavobacteriales|f__Flavobacteriaceae|g__Flavobacterium|s__Flavobacterium_xinjiangense|t__SGB2968
SGB	2969	0	1	kSGB	Species	k__Bacteria|p__Bacteroidetes|c__Flavobacteriia|o__Flavobacteriales|f__Flavobacteriaceae|g__Flavobacterium|s__Flavobacterium_sp_AED|t__SGB2969
SGB	2970	0	1	kSGB	Species	k__Bacteria|p__Bacteroidetes|c__Flavobacteriia|o__Flavobacteriales|f__Flavobacteriaceae|g__Flavobacterium|s__Flavobacterium_sp_FPG59|t__SGB2970
SGB	2971	0	1	kSGB	Species	k__Bacteria|p__Bacteroidetes|c__Flavobacteriia|o__Flavobacteriales|f__Flavobacteriaceae|g__Flavobacterium|s__Flavobacterium_crassostreae|t__SGB2971
SGB	2972	0	2	kSGB	Species	k__Bacteria|p__Bacteroidetes|c__Flavobacteriia|o__Flavobacteriales|f__Flavobacteriaceae|g__Flavobacterium|s__Flavobacterium_hydatis|t__SGB2972
SGB	2973	0	3	kSGB	Species	k__Bacteria|p__Bacteroidetes|c__Flavobacteriia|o__Flavobacteriales|f__Flavobacteriaceae|g__Flavobacterium|s__Flavobacterium_sp_JRM|t__SGB2973
SGB	2974	0	1	kSGB	Species	k__Bacteria|p__Bacteroidetes|c__Flavobacteriia|o__Flavobacteriales|f__Flavobacteriaceae|g__Flavobacterium|s__Flavobacterium_hercynium|t__SGB2974
SGB	2975	0	1	kSGB	Species	k__Bacteria|p__Bacteroidetes|c__Flavobacteriia|o__Flavobacteriales|f__Flavobacteriaceae|g__Flavobacterium|s__Flavobacterium_sp_IR1|t__SGB2975
SGB	2976	0	1	kSGB	Species	k__Bacteria|p__Bacteroidetes|c__Flavobacteriia|o__Flavobacteriales|f__Flavobacteriaceae|g__Flavobacterium|s__Flavobacterium_sp_CF136|t__SGB2976
SGB	2977	0	1	kSGB	Species	k__Bacteria|p__Bacteroidetes|c__Flavobacteriia|o__Flavobacteriales|f__Flavobacteriaceae|g__Flavobacterium|s__Flavobacterium_sp_LM4|t__SGB2977
SGB	2978	0	3	kSGB	Species	k__Bacteria|p__Bacteroidetes|c__Flavobacteriia|o__Flavobacteriales|f__Flavobacteriaceae|g__Flavobacterium|s__Flavobacterium_sp_F52|t__SGB2978
SGB	2980	0	1	kSGB	Species	k__Bacteria|p__Bacteroidetes|c__Flavobacteriia|o__Flavobacteriales|f__Flavobacteriaceae|g__Flavobacterium|s__Flavobacterium_phragmitis|t__SGB2980
SGB	2981	0	1	kSGB	Species	k__Bacteria|p__Bacteroidetes|c__Flavobacteriia|o__Flavobacteriales|f__Flavobacteriaceae|g__Flavobacterium|s__Flavobacterium_sp_Root935|t__SGB2981
SGB	2982	0	2	kSGB	Species	k__Bacteria|p__Bacteroidetes|c__Flavobacteriia|o__Flavobacteriales|f__Flavobacteriaceae|g__Flavobacterium|s__Flavobacterium_plurextorum|t__SGB2982
SGB	2983	0	1	kSGB	Species	k__Bacteria|p__Bacteroidetes|c__Flavobacteriia|o__Flavobacteriales|f__Flavobacteriaceae|g__Flavobacterium|s__Flavobacterium_oncorhynchi|t__SGB2983
SGB	2984	0	2	kSGB	Species	k__Bacteria|p__Bacteroidetes|c__Flavobacteriia|o__Flavobacteriales|f__Flavobacteriaceae|g__Flavobacterium|s__Flavobacterium_sp_fv08|t__SGB2984
SGB	2985	0	2	kSGB	Species	k__Bacteria|p__Bacteroidetes|c__Flavobacteriia|o__Flavobacteriales|f__Flavobacteriaceae|g__Flavobacterium|s__Flavobacterium_sp_VMW|t__SGB2985
SGB	2987	0	1	kSGB	Species	k__Bacteria|p__Bacteroidetes|c__Flavobacteriia|o__Flavobacteriales|f__Flavobacteriaceae|g__Flavobacterium|s__Flavobacterium_sp_Root186|t__SGB2987
SGB	2988	0	1	kSGB	Species	k__Bacteria|p__Bacteroidetes|c__Flavobacteriia|o__Flavobacteriales|f__Flavobacteriaceae|g__Flavobacterium|s__Flavobacterium_defluvii|t__SGB2988
SGB	2989	0	1	kSGB	Species	k__Bacteria|p__Bacteroidetes|c__Flavobacteriia|o__Flavobacteriales|f__Flavobacteriaceae|g__Flavobacterium|s__Flavobacterium_sp_Root901|t__SGB2989
SGB	2990	0	4	kSGB	Species	k__Bacteria|p__Bacteroidetes|c__Flavobacteriia|o__Flavobacteriales|f__Flavobacteriaceae|g__Flavobacterium|s__Flavobacterium_johnsoniae|t__SGB2990
SGB	2991	0	1	kSGB	Species	k__Bacteria|p__Bacteroidetes|c__Flavobacteriia|o__Flavobacteriales|f__Flavobacteriaceae|g__Flavobacterium|s__Flavobacterium_johnsoniae|t__SGB2991
SGB	2992	0	3	kSGB	Species	k__Bacteria|p__Bacteroidetes|c__Flavobacteriia|o__Flavobacteriales|f__Flavobacteriaceae|g__Flavobacterium|s__Flavobacterium_spartansii|t__SGB2992
SGB	2993	0	2	kSGB	Species	k__Bacteria|p__Bacteroidetes|c__Flavobacteriia|o__Flavobacteriales|f__Flavobacteriaceae|g__Flavobacterium|s__Flavobacterium_reichenbachii|t__SGB2993
SGB	2994	0	2	kSGB	Species	k__Bacteria|p__Bacteroidetes|c__Flavobacteriia|o__Flavobacteriales|f__Flavobacteriaceae|g__Flavobacterium|s__Flavobacterium_hibernum|t__SGB2994
SGB	2995	0	1	kSGB	Species	k__Bacteria|p__Bacteroidetes|c__Flavobacteriia|o__Flavobacteriales|f__Flavobacteriaceae|g__Flavobacterium|s__Flavobacterium_sp_9|t__SGB2995
SGB	2996	0	1	kSGB	Species	k__Bacteria|p__Bacteroidetes|c__Flavobacteriia|o__Flavobacteriales|f__Flavobacteriaceae|g__Flavobacterium|s__Flavobacterium_sp_ov086|t__SGB2996
SGB	2997	0	2	kSGB	Species	k__Bacteria|p__Bacteroidetes|c__Flavobacteriia|o__Flavobacteriales|f__Flavobacteriaceae|g__Flavobacterium|s__Flavobacterium_aquidurense|t__SGB2997
SGB	2998	0	3	kSGB	Species	k__Bacteria|p__Bacteroidetes|c__Flavobacteriia|o__Flavobacteriales|f__Flavobacteriaceae|g__Flavobacterium|s__Flavobacterium_piscis|t__SGB2998
SGB	2999	0	1	kSGB	Species	k__Bacteria|p__Bacteroidetes|c__Flavobacteriia|o__Flavobacteriales|f__Flavobacteriaceae|g__Flavobacterium|s__Flavobacterium_aquidurense|t__SGB2999
SGB	3000	0	1	kSGB	Species	k__Bacteria|p__Bacteroidetes|c__Flavobacteriia|o__Flavobacteriales|f__Flavobacteriaceae|g__Flavobacterium|s__Flexibacter_sp_ATCC_35103|t__SGB3000
SGB	3001	0	1	kSGB	Species	k__Bacteria|p__Bacteroidetes|c__Flavobacteriia|o__Flavobacteriales|f__Flavobacteriaceae|g__Flavobacterium|s__Flavobacterium_sp_Leaf82|t__SGB3001
SGB	3002	0	1	kSGB	Species	k__Bacteria|p__Bacteroidetes|c__Flavobacteriia|o__Flavobacteriales|f__Flavobacteriaceae|g__Flavobacterium|s__Flavobacterium_araucananum|t__SGB3002
SGB	3003	0	2	kSGB	Species	k__Bacteria|p__Bacteroidetes|c__Flavobacteriia|o__Flavobacteriales|f__Flavobacteriaceae|g__Flavobacterium|s__Flavobacterium_frigidimaris|t__SGB3003
SGB	3004	0	1	kSGB	Species	k__Bacteria|p__Bacteroidetes|c__Flavobacteriia|o__Flavobacteriales|f__Flavobacteriaceae|g__Flavobacterium|s__Flavobacterium_saccharophilum|t__SGB3004
SGB	3005	0	1	kSGB	Species	k__Bacteria|p__Bacteroidetes|c__Flavobacteriia|o__Flavobacteriales|f__Flavobacteriaceae|g__Flavobacterium|s__Flavobacterium_sp_Root420|t__SGB3005
SGB	3006	0	3	kSGB	Species	k__Bacteria|p__Bacteroidetes|c__Flavobacteriia|o__Flavobacteriales|f__Flavobacteriaceae|g__Flavobacterium|s__Flavobacterium_pectinovorum|t__SGB3006
SGB	3007	0	1	kSGB	Species	k__Bacteria|p__Bacteroidetes|c__Flavobacteriia|o__Flavobacteriales|f__Flavobacteriaceae|g__Flavobacteriaceae_unclassified|s__Flavobacteriaceae_bacterium_CRH|t__SGB3007
[truncated: 15,341 more rows]
